# Supplementary material for: Modulation of the Surface Proteome through Multiple Ubiquitylation Pathways in African Trypanosomes
Source: PLoS Pathog. 2015 Oct 22;11(10):e1005236. doi: 10.1371/journal.ppat.1005236 (PMC4619645; doi:10.1371/journal.ppat.1005236)
Supplement: S1 Table — Protein groups output table of the MaxQuant analysis of TbUsp7 RNAi (26h and 48h) and TbVdu1 RNAi (48h). False identifications (contaminants, reverses) and peptide IDs were removed from the list. Columns G-K were added and list the normalised ratios (induced/uninduced) for each independent experimental replicate (grey), the respective average (orange) and standard deviation (light orange). ND; not detected. (XLSX) [file ppat.1005236.s005.xlsx]

## Sheet: Usp7_26h
Protein IDs	Majority protein IDs	Peptide counts (all)	Peptide counts (razor+unique)	Peptide counts (unique)	Fasta headers	experiment1 ratio H/L normalized	experiment2 ratio L/H normalized	average	sd	Number of proteins	Peptides	Razor + unique peptides	Unique peptides	Peptides 1	Peptides 2	Razor + unique peptides 1	Razor + unique peptides 2	Unique peptides 1	Unique peptides 2	Sequence coverage [%]	Unique + razor sequence coverage [%]	Unique sequence coverage [%]	Mol. weight [kDa]	Sequence length	Sequence lengths	Fraction average	Fraction 1	Fraction 2	Fraction 3	Fraction 4	Fraction 5	Fraction 6	Fraction 7	Fraction 8	Q-value	Score	Ratio H/L	Ratio H/L normalized	Ratio H/L variability [%]	Ratio H/L count	Ratio H/L iso-count	Ratio H/L type	Ratio H/L 1	Ratio H/L normalized 1	Ratio H/L variability [%] 1	Ratio H/L count 1	Ratio H/L iso-count 1	Ratio H/L type 1	Ratio H/L 2
Tb927.7.470	Tb927.7.470	2	2	2	>Tb927.7.470 | organism=Trypanosoma_brucei_TREU927 | product=hypothetical protein | location=Tb927_07_v5.1:85318-86211(-) | length=297 | sequence_SO=chromosome | SO=protein_coding	0.38683	0.384349	0.38559	0.00186053	1	2	2	2	2	2	2	2	2	2	6.7	6.7	6.7	33.145	297	297	6						4			0	3.7242	0.32999	0.41539	105.79	3	0	Median	0.30508	0.38683	10.074	2	0	Median	2.2789
Tb927.5.360;Tb11.v5.0231	Tb927.5.360;Tb11.v5.0231	27;27	27;27	12;12	>Tb927.5.360 | organism=Trypanosoma_brucei_TREU927 | product=75 kDa invariant surface glycoprotein (ISG75) | location=Tb927_05_v5.1:163458-165029(-) | length=523 | sequence_SO=chromosome | SO=protein_coding;>Tb11.v5.0231 | organism=Trypanosoma_brucei_TREU9	0.46136	0.393066	0.427213	0.0512203	2	27	27	12	18	19	18	19	5	11	52	52	31.5	58.225	523	523;523	4.22	1			37	3	3		1	0	57.927	1.0639	1.2376	81.296	33	0	Median	0.36316	0.46136	27.336	16	0	Median	2.1134
Tb927.5.390;Tb11.v5.0228;Tb927.5.400;Tb927.5.350;Tb11.v5.0421;Tb11.v5.0227	Tb927.5.390;Tb11.v5.0228	21;21;9;9;9;9	6;6;0;0;0;0	2;2;0;0;0;0	>Tb927.5.390 | organism=Trypanosoma_brucei_TREU927 | product=75 kDa invariant surface glycoprotein, putative | location=Tb927_05_v5.1:177211-180087(+) | length=522 | sequence_SO=chromosome | SO=protein_coding;>Tb11.v5.0228 | organism=Trypanosoma_brucei_TRE	0.47585	0.386145	0.430998	0.0672787	6	21	6	2	16	14	3	6	1	2	36.8	12.8	6.7	57.736	522	522;523;522;522;522;522	4				12					0	18.364	2.1496	2.5869	88.288	7	0	Median	0.36197	0.47585	41.903	4	2	Median	2.3097
Tb927.9.11480	Tb927.9.11480	10	10	10	>Tb927.9.11480 | organism=Trypanosoma_brucei_TREU927 | product=hypothetical protein, conserved | location=Tb927_09_v5.1:1790459-1792144(+) | length=561 | sequence_SO=chromosome | SO=protein_coding	0.40334	0.488234	0.445787	0.0636702	1	10	10	10	4	9	4	9	4	9	27.1	27.1	27.1	62.474	561	561	4				15					0	21.608	1.6716	1.9194	71.803	12	0	Median	0.32339	0.40334	18.551	3	0	Median	1.739
Tb927.11.13130	Tb927.11.13130	12	12	12	>Tb927.11.13130 | organism=Trypanosoma_brucei_TREU927 | product=membrane-bound acid phosphatase 1 precursor (MBAP1) | location=Tb927_11_v5.1:3516306-3517880(-) | length=524 | sequence_SO=chromosome | SO=protein_coding	0.50834	0.491908	0.500124	0.0123239	1	12	12	12	11	6	11	6	11	6	27.1	27.1	27.1	59.376	524	524	4				18					0	38.523	0.43886	0.56181	68.752	11	0	Median	0.40346	0.50834	7.4178	7	0	Median	1.7421
Tb927.11.7550	Tb927.11.7550	3	3	3	>Tb927.11.7550 | organism=Trypanosoma_brucei_TREU927 | product=hypothetical protein, conserved | location=Tb927_11_v5.1:2136209-2136958(-) | length=221 | sequence_SO=chromosome | SO=protein_coding	0.52983	0.492199	0.511014	0.0282235	1	3	3	3	2	3	2	3	2	3	17.6	17.6	17.6	24.504	221	221	7							5		0	32.961	0.44726	0.58142	78.154	3	0	Median	0.41447	0.52983	13.14	2	0	Median	1.8082
Tb927.9.9000	Tb927.9.9000	3	3	3	>Tb927.9.9000 | organism=Trypanosoma_brucei_TREU927 | product=isopentenyl-diphosphate delta-isomerase (type II), putative | location=Tb927_09_v5.1:1441678-1442748(-) | length=356 | sequence_SO=chromosome | SO=protein_coding	0.67624	0.663086	0.669663	0.0098655	1	3	3	3	2	2	2	2	2	2	16.6	16.6	16.6	38.986	356	356	6						4			0	5.2185	1.2691	1.3959	30.774	3	0	Median	0.53003	0.67624	40.462	2	1	Median	1.3724
Tb927.5.3560	Tb927.5.3560	9	9	9	>Tb927.5.3560 | organism=Trypanosoma_brucei_TREU927 | product=vesicle-associated membrane protein, putative,synaptobrevin, putative (VAMP) | location=Tb927_05_v5.1:1174257-1174907(+) | length=216 | sequence_SO=chromosome | SO=protein_coding	0.723	0.671186	0.697093	0.0388605	1	9	9	9	9	7	9	7	9	7	53.7	53.7	53.7	24.402	216	216	7.46							15	13	0	74.386	0.61812	0.7839	38.505	25	0	Median	0.57893	0.723	8.8571	15	0	Median	1.2752
Tb927.5.630;Tb11.v5.0851	Tb927.5.630	19;2	19;2	19;2	>Tb927.5.630 | organism=Trypanosoma_brucei_TREU927 | product=acidic phosphatase, putative | location=Tb927_05_v5.1:265245-268369(-) | length=401 | sequence_SO=chromosome | SO=protein_coding	0.71699	0.779362	0.748176	0.0467794	2	19	19	19	18	15	18	15	18	15	38.7	38.7	38.7	43.663	401	401;360	3.39	1	3	33	23	1		1		0	140.11	0.6394	0.82924	32.42	51	0	Median	0.55441	0.71699	16.528	31	0	Median	1.0727
Tb927.5.3580	Tb927.5.3580	6	6	6	>Tb927.5.3580 | organism=Trypanosoma_brucei_TREU927 | product=phosphoglycerate mutase protein, putative | location=Tb927_05_v5.1:1177973-1179277(+) | length=185 | sequence_SO=chromosome | SO=protein_coding	0.90309	0.645203	0.774146	0.193415	1	6	6	6	3	4	3	4	3	4	37.8	37.8	37.8	20.717	185	185	7							7		0	6.0713	0.84577	1.1119	31.441	5	0	Median	0.71032	0.90309	20.726	3	0	Median	1.3826
Tb927.7.880	Tb927.7.880	5	5	5	>Tb927.7.880 | organism=Trypanosoma_brucei_TREU927 | product=RNA-binding protein, putative (RPB25) | location=Tb927_07_v5.1:208230-209063(-) | length=277 | sequence_SO=chromosome | SO=protein_coding	0.82647	0.757633	0.792052	0.0516276	1	5	5	5	5	2	5	2	5	2	26.7	26.7	26.7	29.808	277	277	7.5						2		6	0	20.614	0.76337	0.978	25.279	7	0	Median	0.66072	0.82647	12.069	5	0	Median	1.2074
Tb927.11.6280	Tb927.11.6280	16	16	16	>Tb927.11.6280 | organism=Trypanosoma_brucei_TREU927 | product=pyruvate phosphate dikinase (PPDK) | location=Tb927_11_v5.1:1767498-1770239(-) | length=913 | sequence_SO=chromosome | SO=protein_coding	0.75538	0.841751	0.798565	0.0647781	1	16	16	16	11	11	11	11	11	11	25.4	25.4	25.4	100.45	913	913	3			23						0	44.89	0.80989	0.94425	26.834	16	0	Median	0.59804	0.75538	10.589	7	0	Median	1.0569
Tb927.2.4850	Tb927.2.4850	8	8	8	>Tb927.2.4850 | organism=Trypanosoma_brucei_TREU927 | product=hypothetical protein, conserved | location=Tb927_02_v5.1:860900-861658(-) | length=252 | sequence_SO=chromosome | SO=protein_coding	0.91675	0.706215	0.811482	0.157901	1	8	8	8	5	5	5	5	5	5	39.7	39.7	39.7	29.04	252	252	6.6						4	6		0	28.991	0.71693	0.92898	23.648	5	0	Median	0.70797	0.91675	3.8835	4	0	Median	1.2408
Tb927.8.5740	Tb927.8.5740	6	6	6	>Tb927.8.5740 | organism=Trypanosoma_brucei_TREU927 | product=proteasome 26S non-ATPase subunit 9, putative | location=Tb927_08_v5.1:1697458-1698126(+) | length=222 | sequence_SO=chromosome | SO=protein_coding	0.85987	0.770832	0.815351	0.0667787	1	6	6	6	6	2	6	2	6	2	40.5	40.5	40.5	25.105	222	222	7							9		0	45.893	0.78477	0.97007	31.855	9	0	Median	0.665	0.85987	33.439	7	0	Median	1.1192
Tb927.6.3940	Tb927.6.3940	8	8	8	>Tb927.6.3940 | organism=Trypanosoma_brucei_TREU927 | product=hypothetical protein, conserved | location=Tb927_06_v5.1:1158505-1159602(-) | length=364 | sequence_SO=chromosome | SO=protein_coding	0.85002	0.809913	0.829967	0.03008	1	8	8	8	8	4	8	4	8	4	33.5	33.5	33.5	39.208	364	364	5.61					9	8		1	0	29.179	0.68564	0.86627	21.354	12	0	Median	0.66672	0.85002	11.598	8	0	Median	1.1172
Tb927.4.3480	Tb927.4.3480	2	2	2	>Tb927.4.3480 | organism=Trypanosoma_brucei_TREU927 | product=hypothetical protein | location=Tb927_04_v5.1:902006-902570(-) | length=183 | sequence_SO=chromosome | SO=protein_coding	0.92707	0.73692	0.831995	0.142613	1	2	2	2	2	2	2	2	2	2	13.1	13.1	13.1	19.994	183	183	7.5							2	2	0	10.577	0.87784	1.0427	25.648	4	0	Median	0.72843	0.92707	2.1121	2	0	Median	1.1682
Tb927.10.8630	Tb927.10.8630	7	7	7	>Tb927.10.8630 | organism=Trypanosoma_brucei_TREU927 | product=hypothetical protein, conserved | location=Tb927_10_v5.1:2138489-2139256(+) | length=255 | sequence_SO=chromosome | SO=protein_coding	0.93483	0.733783	0.834307	0.150785	1	7	7	7	7	3	7	3	7	3	41.2	41.2	41.2	27.968	255	255	7							10		0	28.979	0.74492	0.94755	18.268	10	0	Median	0.73588	0.93483	6.644	7	0	Median	1.1714
Tb927.7.4870;Tb11.v5.0169	Tb927.7.4870;Tb11.v5.0169	3;3	3;3	3;3	>Tb927.7.4870 | organism=Trypanosoma_brucei_TREU927 | product=hypothetical protein, conserved | location=Tb927_07_v5.1:1279068-1279880(-) | length=270 | sequence_SO=chromosome | SO=protein_coding;>Tb11.v5.0169 | organism=Trypanosoma_brucei_TREU927 | produc	0.81783	0.859402	0.838616	0.0311789	2	3	3	3	3	3	3	3	3	3	10.7	10.7	10.7	30.457	270	270;270	6.43						4	3		0	19.505	0.67097	0.81783	31.786	5	0	Median	0.65888	0.81783	38.714	3	0	Median	1.031
Tb927.10.810	Tb927.10.810	4	4	4	>Tb927.10.810 | organism=Trypanosoma_brucei_TREU927 | product=hypothetical protein, conserved | location=Tb927_10_v5.1:208873-210684(+) | length=603 | sequence_SO=chromosome | SO=protein_coding	0.86981	0.822368	0.846089	0.0355812	1	4	4	4	2	3	2	3	2	3	13.3	13.3	13.3	67.488	603	603	4				6					0	15.242	0.69561	0.87978	26.478	6	0	Median	0.67628	0.86981	3.9752	3	0	Median	1.0125
Tb927.11.2860	Tb927.11.2860	3	3	3	>Tb927.11.2860 | organism=Trypanosoma_brucei_TREU927 | product=hypothetical protein, conserved | location=Tb927_11_v5.1:841348-843657(-) | length=769 | sequence_SO=chromosome | SO=protein_coding	0.7895	0.90876	0.84913	0.0894453	1	3	3	3	3	2	3	2	3	2	6	6	6	83.077	769	769	3.14			6	1					0	12.701	0.61928	0.7895	1.0625	3	0	Median	0.61928	0.7895	1.0625	3	0	Median	1.0075
Tb927.11.250	Tb927.11.250	6	6	6	>Tb927.11.250 | organism=Trypanosoma_brucei_TREU927 | product=ubiquitin carboxyl-terminal hydrolase, putative,cysteine peptidase, Clan CA, family C12, putative | location=Tb927_11_v5.1:56264-56974(-) | length=236 | sequence_SO=chromosome | SO=protein_codin	0.84336	0.857706	0.850533	0.0107599	1	6	6	6	5	2	5	2	5	2	28	28	28	25.977	236	236	6.88						2	5	1	0	11.609	0.77435	0.94412	16.305	8	0	Median	0.65262	0.84336	12.528	5	0	Median	0.99358
Tb927.3.4510	Tb927.3.4510	6	6	6	>Tb927.3.4510 | organism=Trypanosoma_brucei_TREU927 | product=hypothetical protein, conserved | location=Tb927_03_v5.1:1260167-1264162(-) | length=1331 | sequence_SO=chromosome | SO=protein_coding	0.94291	0.758725	0.850818	0.138138	1	6	6	6	5	3	5	3	5	3	7.1	7.1	7.1	150.91	1331	1331	2		9							0	12.453	0.79461	0.97698	23.37	7	0	Median	0.76557	0.94291	10.764	5	0	Median	1.1682
Tb927.10.6810	Tb927.10.6810	3	3	3	>Tb927.10.6810 | organism=Trypanosoma_brucei_TREU927 | product=guanylate kinase, putative | location=Tb927_10_v5.1:1717161-1717955(+) | length=264 | sequence_SO=chromosome | SO=protein_coding	0.91758	0.790514	0.854047	0.0952996	1	3	3	3	3	2	3	2	3	2	15.9	15.9	15.9	29.956	264	264	6.5						3	3		0	11.982	0.7521	0.90148	16.277	3	0	Median	0.74059	0.91758	16.597	3	1	Median	1.1474
Tb927.11.1230	Tb927.11.1230	3	3	3	>Tb927.11.1230 | organism=Trypanosoma_brucei_TREU927 | product=hypothetical protein, conserved | location=Tb927_11_v5.1:358626-359972(+) | length=448 | sequence_SO=chromosome | SO=protein_coding	1.1271	0.582615	0.854857	0.408364	1	3	3	3	2	2	2	2	2	2	8.9	8.9	8.9	53.366	448	448	5					5				0	5.6177	0.93711	1.1271	46.469	4	2	Median	0.88169	1.1271	6.94	2	1	Median	1.5625
Tb927.7.3880	Tb927.7.3880	4	4	4	>Tb927.7.3880 | organism=Trypanosoma_brucei_TREU927 | product=protein kinase, putative | location=Tb927_07_v5.1:1011421-1013751(-) | length=776 | sequence_SO=chromosome | SO=protein_coding	0.89942	0.810833	0.855126	0.0664405	1	4	4	4	3	3	3	3	3	3	6.8	6.8	6.8	87.072	776	776	4			2	5	2				0	6.4277	0.74889	0.92379	21.588	8	0	Median	0.70376	0.89942	18.22	5	0	Median	1.1269
Tb927.10.12960	Tb927.10.12960	11	11	11	>Tb927.10.12960 | organism=Trypanosoma_brucei_TREU927 | product=ras-related protein rab-5,small GTPase, putative (RAB5A) | location=Tb927_10_v5.1:3150211-3150903(-) | length=230 | sequence_SO=chromosome | SO=protein_coding	0.89779	0.815727	0.856759	0.0615471	1	11	11	11	11	6	11	6	11	6	71.3	71.3	71.3	24.484	230	230	6.77	1					3	19	3	0	67.324	0.78289	0.9782	17.829	21	0	Median	0.71246	0.89779	10.152	14	0	Median	1.0326
Tb927.8.5510	Tb927.8.5510	6	6	6	>Tb927.8.5510 | organism=Trypanosoma_brucei_TREU927 | product=apurinic/apyrimidinic endonuclease, putative | location=Tb927_08_v5.1:1630582-1631772(+) | length=396 | sequence_SO=chromosome | SO=protein_coding	1.041	0.677277	0.859139	0.272792	1	6	6	6	5	3	5	3	5	3	25.5	25.5	25.5	44.375	396	396	5.75					3	4	1		0	17.445	0.8345	1.01	9.2319	6	0	Median	0.83188	1.041	9.0109	5	0	Median	1.3306
Tb927.9.1680	Tb927.9.1680	1	1	1	>Tb927.9.1680 | organism=Trypanosoma_brucei_TREU927 | product=Mov34/MPN/PAD-1 metallopeptidase, putative,metallo-peptidase, Clan MP, Family M67 | location=Tb927_09_v5.1:387124-387957(-) | length=277 | sequence_SO=chromosome | SO=protein_coding	0.86052	0.863185	0.861853	0.00199886	1	1	1	1	1	1	1	1	1	1	4.3	4.3	4.3	31.173	277	277	7						2	1	2	0	5.9777	0.7949	0.99269	49.335	5	0	Median	0.705	0.86052	54.184	3	0	Median	1.0501
Tb927.3.4500;Tb11.v5.0629	Tb927.3.4500;Tb11.v5.0629	5;4	5;4	5;4	>Tb927.3.4500 | organism=Trypanosoma_brucei_TREU927 | product=fumarate hydratase, class I (FHc) | location=Tb927_03_v5.1:1256691-1258388(-) | length=565 | sequence_SO=chromosome | SO=protein_coding;>Tb11.v5.0629 | organism=Trypanosoma_brucei_TREU927 | prod	0.83296	0.900495	0.866728	0.0506515	2	5	5	5	4	3	4	3	4	3	19.1	19.1	19.1	62.262	565	565;458	4				7					0	10.803	0.72007	0.86295	18.918	7	0	Median	0.65241	0.83296	11.603	4	0	Median	1.0158
Tb927.10.9400	Tb927.10.9400	4	4	4	>Tb927.10.9400 | organism=Trypanosoma_brucei_TREU927 | product=branch point binding protein, putative | location=Tb927_10_v5.1:2324478-2325293(+) | length=271 | sequence_SO=chromosome | SO=protein_coding	0.74239	0.99691	0.86965	0.19089	1	4	4	4	2	2	2	2	2	2	16.2	16.2	16.2	31.63	271	271	6						4			0	6.322	0.60383	0.77853	5.8512	3	0	Median	0.58889	0.74239	6.7215	2	0	Median	0.90494
Tb927.5.3250	Tb927.5.3250	6	6	6	>Tb927.5.3250 | organism=Trypanosoma_brucei_TREU927 | product=hypothetical protein, conserved | location=Tb927_05_v5.1:1068696-1073369(-) | length=1557 | sequence_SO=chromosome | SO=protein_coding	0.76387	0.983284	0.873577	0.164561	1	6	6	6	3	4	3	4	3	4	6.2	6.2	6.2	172.16	1557	1557	3.14		4		2		1			0	22.416	0.7504	0.89563	16.098	6	0	Median	0.60522	0.76387	13.07	3	0	Median	0.91536
Tb927.10.3310	Tb927.10.3310	6	6	6	>Tb927.10.3310 | organism=Trypanosoma_brucei_TREU927 | product=hypothetical protein, conserved | location=Tb927_10_v5.1:852096-854936(+) | length=946 | sequence_SO=chromosome | SO=protein_coding	0.80577	0.946253	0.876011	0.105362	1	6	6	6	4	4	4	4	4	4	7.7	7.7	7.7	110.24	946	946	3			8						0	9.5359	0.81428	0.92755	20.927	6	0	Median	0.62863	0.80577	25.594	3	0	Median	0.88084
Tb927.11.15190	Tb927.11.15190	5	5	5	>Tb927.11.15190 | organism=Trypanosoma_brucei_TREU927 | product=hypothetical protein, conserved | location=Tb927_11_v5.1:4035840-4037888(-) | length=682 | sequence_SO=chromosome | SO=protein_coding	0.97217	0.787278	0.879724	0.138669	1	5	5	5	3	4	3	4	3	4	11.1	11.1	11.1	77.343	682	682	3.88			1	7					0	14.012	0.8891	1.1458	17.009	7	0	Median	0.78523	0.97217	15.241	3	0	Median	1.0603
Tb927.2.1080	Tb927.2.1080	20	3	0	>Tb927.2.1080 | organism=Trypanosoma_brucei_TREU927 | product=retrotransposon hot spot protein 5 (RHS5), putative | location=Tb927_02_v5.1:179639-181663(-) | length=674 | sequence_SO=chromosome | SO=protein_coding	0.81576	0.944465	0.880113	0.0965291	1	20	3	0	18	18	2	2	0	0	29.2	5.3	0	76.643	674	674	3			4						0	3.5474	0.71561	0.83742	30.234	4	0	Median	0.64076	0.81576	13.795	2	0	Median	0.9387
Tb927.8.7210;Tb927.4.5190	Tb927.8.7210	6;1	6;1	6;1	>Tb927.8.7210 | organism=Trypanosoma_brucei_TREU927 | product=hypothetical protein, conserved | location=Tb927_08_v5.1:2071616-2072065(+) | length=149 | sequence_SO=chromosome | SO=protein_coding	0.84496	0.916926	0.880943	0.0539748	2	6	6	6	6	2	6	2	6	2	59.1	59.1	59.1	16.908	149	149;149	7.9							1	9	0	30.324	0.7968	0.94003	18.915	10	0	Median	0.65844	0.84496	14.789	6	0	Median	0.98311
Tb927.8.730	Tb927.8.730	4	4	4	>Tb927.8.730 | organism=Trypanosoma_brucei_TREU927 | product=nucleolar RNA-binding protein, putative | location=Tb927_08_v5.1:204081-204861(-) | length=253 | sequence_SO=chromosome | SO=protein_coding	0.80182	0.960246	0.881033	0.118819	1	4	4	4	4	2	4	2	4	2	13.8	13.8	13.8	28.338	253	253	5.62		1			1	5		1	0	8.6631	0.81798	0.99796	23.245	6	0	Median	0.64058	0.80182	16.133	4	2	Median	0.90387
Tb927.11.1370	Tb927.11.1370	12	12	12	>Tb927.11.1370 | organism=Trypanosoma_brucei_TREU927 | product=glutaredoxin, putative | location=Tb927_11_v5.1:397850-398137(+) | length=95 | sequence_SO=chromosome | SO=protein_coding	0.89208	0.872981	0.882531	0.0143241	1	12	12	12	11	6	11	6	11	6	90.5	90.5	90.5	10.576	95	95	8								18	0	34.115	0.72856	0.92715	17.936	15	0	Median	0.71692	0.89208	15.223	11	0	Median	0.9894
Tb927.11.7420	Tb927.11.7420	4	4	4	>Tb927.11.7420 | organism=Trypanosoma_brucei_TREU927 | product=phosphoadenosine phosphosulfate reductase-like protein | location=Tb927_11_v5.1:2090763-2091731(+) | length=322 | sequence_SO=chromosome | SO=protein_coding	0.92185	0.844024	0.882937	0.0583693	1	4	4	4	2	2	2	2	2	2	15.2	15.2	15.2	36.057	322	322	6						4			0	5.0634	0.9786	1.1529	28.92	4	2	Median	0.73199	0.92185	41.213	2	1	Median	1.0594
Tb927.8.2660;Tb11.v5.0472;Tb11.v5.0471	Tb927.8.2660	4;1;1	4;1;1	4;1;1	>Tb927.8.2660 | organism=Trypanosoma_brucei_TREU927 | product=hypothetical protein, conserved | location=Tb927_08_v5.1:785065-790824(+) | length=1919 | sequence_SO=chromosome | SO=protein_coding	0.91499	0.852224	0.883607	0.0470743	3	4	4	4	3	3	3	3	3	3	2.6	2.6	2.6	209.69	1919	1919;425;752	2	1	6	1						0	22.043	0.83631	1.0273	15.642	6	0	Median	0.72573	0.91499	11.862	4	0	Median	1.0181
Tb927.10.8440;Tb11.v5.0330;Tb927.10.8480;Tb927.10.8470;Tb927.10.8460;Tb11.v5.0309;Tb11.v5.0308;Tb11.v5.0307;Tb927.10.8450;Tb11.v5.0310;Tb11.v5.0333;Tb927.10.8530;Tb927.10.8520;Tb927.10.8510;Tb927.10.8500;Tb927.10.8490;Tb11.v5.0332;Tb11.v5.0331	Tb927.10.8440;Tb11.v5.0330;Tb927.10.8480;Tb927.10.8470;Tb927.10.8460;Tb11.v5.0309;Tb11.v5.0308;Tb11.v5.0307;Tb927.10.8450;Tb11.v5.0310	11;11;10;10;10;10;10;10;9;9;1;1;1;1;1;1;1;1	11;11;10;10;10;10;10;10;9;9;1;1;1;1;1;1;1;1	11;11;10;10;10;10;10;10;9;9;1;1;1;1;1;1;1;1	>Tb927.10.8440 | organism=Trypanosoma_brucei_TREU927 | product=glucose transporter 1B (THT1-) | location=Tb927_10_v5.1:2093459-2095042(+) | length=527 | sequence_SO=chromosome | SO=protein_coding;>Tb11.v5.0330 | organism=Trypanosoma_brucei_TREU927 | produc	0.84751	0.924727	0.886119	0.0579129	18	11	11	11	9	10	9	10	9	10	19.9	19.9	19.9	56.479	527	527;527;527;527;527;527;527;527;527;527;322;529;529;529;529;529;529;529	3.92	9	13	9	11	17	16	1	1	0	70.149	0.76598	0.94165	18.675	66	0	Median	0.66534	0.84751	10.932	31	0	Median	0.92367
Tb927.11.16320	Tb927.11.16320	4	4	4	>Tb927.11.16320 | organism=Trypanosoma_brucei_TREU927 | product=hypothetical protein, conserved | location=Tb927_11_v5.1:4329086-4329637(-) | length=154 | sequence_SO=chromosome | SO=protein_coding	0.8405	0.934579	0.88754	0.0705596	1	4	4	4	3	4	3	4	3	4	33.1	33.1	33.1	17.008	154	154	8								8	0	8.6798	0.74021	0.86412	15.241	4	0	Median	0.67799	0.8405	9.5037	3	1	Median	0.97907
Tb927.9.12150	Tb927.9.12150	4	4	4	>Tb927.9.12150 | organism=Trypanosoma_brucei_TREU927 | product=transport protein particle (TRAPP) subunit, putative | location=Tb927_09_v5.1:1898906-1899514(+) | length=202 | sequence_SO=chromosome | SO=protein_coding	0.97839	0.801025	0.889708	0.133024	1	4	4	4	4	3	4	3	4	3	24.3	24.3	24.3	23.01	202	202	7							8		0	21.579	0.83743	1.0739	14.877	6	0	Median	0.7769	0.97839	11.367	4	0	Median	1.0825
Tb927.2.5030	Tb927.2.5030	3	3	3	>Tb927.2.5030 | organism=Trypanosoma_brucei_TREU927 | product=transcription initiation protein, putative | location=Tb927_02_v5.1:890141-892288(-) | length=715 | sequence_SO=chromosome | SO=protein_coding	0.91	0.872296	0.891148	0.0282781	1	3	3	3	2	3	2	3	2	3	6.6	6.6	6.6	79.801	715	715	3			5						0	5.5442	0.89832	1.1308	11.461	3	0	Median	0.717	0.91	30.724	2	1	Median	1.0215
Tb927.10.15730	Tb927.10.15730	4	4	4	>Tb927.10.15730 | organism=Trypanosoma_brucei_TREU927 | product=hypothetical protein, conserved | location=Tb927_10_v5.1:3871247-3881629(+) | length=3460 | sequence_SO=chromosome | SO=protein_coding	0.89388	0.889126	0.891503	0.00356551	1	4	4	4	2	2	2	2	2	2	1.4	1.4	1.4	383.41	3460	3460	2	3	1			1				0	7.3286	0.85505	1.0203	23.021	4	0	Median	0.72498	0.89388	25.386	2	0	Median	0.98582
Tb927.9.3750	Tb927.9.3750	6	6	6	>Tb927.9.3750 | organism=Trypanosoma_brucei_TREU927 | product=hypothetical protein, conserved | location=Tb927_09_v5.1:747848-748333(+) | length=161 | sequence_SO=chromosome | SO=protein_coding	0.91479	0.868659	0.891724	0.0345984	1	6	6	6	5	4	5	4	5	4	59	59	59	18.076	161	161	7.6							6	9	0	57.133	0.88136	0.98886	18.918	15	0	Median	0.72954	0.91479	12.577	7	0	Median	1.0302
Tb927.10.210	Tb927.10.210	3	3	3	>Tb927.10.210 | organism=Trypanosoma_brucei_TREU927 | product=GPI transamidase component GAA1 (TbGAA1) | location=Tb927_10_v5.1:75527-76912(+) | length=461 | sequence_SO=chromosome | SO=protein_coding	0.92094	0.863111	0.892025	0.043372	1	3	3	3	2	3	2	3	2	3	8.7	8.7	8.7	51.313	461	461	6						6			0	9.0076	0.72166	0.92094	21.71	4	0	Median	0.72166	0.92094	15.472	2	0	Median	1.0552
Tb927.10.4490;Tb10.v4.0039	Tb927.10.4490;Tb10.v4.0039	4;4	4;4	4;4	>Tb927.10.4490 | organism=Trypanosoma_brucei_TREU927 | product=hypothetical protein, conserved | location=Tb927_10_v5.1:1153329-1156301(-) | length=990 | sequence_SO=chromosome | SO=protein_coding;>Tb10.v4.0039 | organism=Trypanosoma_brucei_TREU927 | produ	0.79879	0.987459	0.893125	0.141502	2	4	4	4	2	2	2	2	2	2	4.8	4.8	4.8	115.32	990	990;990	3			4						0	30.547	0.74986	0.87512	15.044	4	0	Median	0.64079	0.79879	2.6998	2	0	Median	0.92333
Tb927.8.5880	Tb927.8.5880	6	6	6	>Tb927.8.5880 | organism=Trypanosoma_brucei_TREU927 | product=eukaryotic translation initiation factor 1A, putative | location=Tb927_08_v5.1:1732407-1732925(+) | length=172 | sequence_SO=chromosome | SO=protein_coding	0.9189	0.869263	0.894081	0.0372279	1	6	6	6	6	6	6	6	6	6	44.2	44.2	44.2	19.445	172	172	7.11				1			13	5	0	44.979	0.82404	0.99464	14.403	16	0	Median	0.71938	0.9189	8.4449	8	0	Median	0.98031
Tb927.4.1340	Tb927.4.1340	7	7	7	>Tb927.4.1340 | organism=Trypanosoma_brucei_TREU927 | product=cleavage and polyadenylation specificity factor subunit, putative (CPSF3) | location=Tb927_04_v5.1:351645-353957(-) | length=770 | sequence_SO=chromosome | SO=protein_coding	0.88338	0.906783	0.895081	0.0175521	1	7	7	7	6	3	6	3	6	3	14.7	14.7	14.7	85.313	770	770	3.33			6	3					0	11.655	0.74656	0.93342	23.308	7	0	Median	0.70391	0.88338	17.458	4	0	Median	0.97749
Tb927.11.8300	Tb927.11.8300	6	6	6	>Tb927.11.8300 | organism=Trypanosoma_brucei_TREU927 | product=hypothetical protein, conserved | location=Tb927_11_v5.1:2330735-2332723(+) | length=662 | sequence_SO=chromosome | SO=protein_coding	1.0396	0.753409	0.896505	0.214643	1	6	6	6	4	3	4	3	4	3	16.8	16.8	16.8	72.96	662	662	4				7					0	20.08	0.8224	1.0396	23.451	4	0	Median	0.815	1.0396	52.564	4	2	Median	1.0892
Tb927.7.2200	Tb927.7.2200	2	2	2	>Tb927.7.2200 | organism=Trypanosoma_brucei_TREU927 | product=hypothetical protein, conserved | location=Tb927_07_v5.1:569145-570478(-) | length=78 | sequence_SO=chromosome | SO=protein_coding	1.1062	0.688373	0.897287	0.31337	1	2	2	2	2	2	2	2	2	2	29.5	29.5	29.5	8.8073	78	78	8								5	0	6.3026	1.2313	1.4524	31.508	4	2	Median	0.87968	1.1062	46.585	2	0	Median	1.2431
Tb927.3.4230	Tb927.3.4230	19	19	19	>Tb927.3.4230 | organism=Trypanosoma_brucei_TREU927 | product=subtilisin-like serine peptidase,serine peptidase, clan SB, family S8-like protein | location=Tb927_03_v5.1:1189643-1193809(-) | length=1388 | sequence_SO=chromosome | SO=protein_coding	0.87704	0.918021	0.89753	0.0307356	1	19	19	19	17	12	17	12	17	12	19.4	19.4	19.4	151.32	1388	1388	2		29							0	44.099	0.7794	0.95976	24.298	25	0	Median	0.70212	0.87704	15.083	14	0	Median	0.96788
Tb11.v5.0731;Tb927.2.3270	Tb11.v5.0731;Tb927.2.3270	8;4	8;4	5;1	>Tb11.v5.0731 | organism=Trypanosoma_brucei_TREU927 | product=65 kDa invariant surface glycoprotein, putative | location=Tb927_11_bin_v5.1:3748160-3749452(-) | length=430 | sequence_SO=random_sequence | SO=protein_coding;>Tb927.2.3270 | organism=Trypanosom	0.88314	0.912742	0.897941	0.0222014	2	8	8	5	7	6	7	6	4	4	25.8	25.8	21.9	47.627	430	430;436	4.12				16		1			0	20.573	0.75084	0.94942	30.356	14	0	Median	0.68913	0.88314	20.032	9	0	Median	0.90833
Tb927.10.14130	Tb927.10.14130	3	3	3	>Tb927.10.14130 | organism=Trypanosoma_brucei_TREU927 | product=hypothetical protein, conserved | location=Tb927_10_v5.1:3432893-3433351(-) | length=152 | sequence_SO=chromosome | SO=protein_coding	0.81758	0.979144	0.898362	0.121173	1	3	3	3	2	2	2	2	2	2	25.7	25.7	25.7	17.116	152	152	7.5							3	3	0	51.382	0.91569	1.0076	12.035	5	0	Median	0.6526	0.81758	10.161	3	1	Median	0.91824
Tb927.6.3890	Tb927.6.3890	9	8	8	>Tb927.6.3890 | organism=Trypanosoma_brucei_TREU927 | product=replication factor C, subunit 2, putative | location=Tb927_06_v5.1:1149976-1151019(-) | length=347 | sequence_SO=chromosome | SO=protein_coding	0.88833	0.91191	0.90012	0.0176847	1	9	8	8	6	4	5	4	5	4	31.4	29.4	29.4	38.809	347	347	6						10			0	12.223	0.82564	0.95732	17.407	9	0	Median	0.65691	0.88833	16.413	5	0	Median	0.98819
Tb927.9.3760	Tb927.9.3760	6	6	6	>Tb927.9.3760 | organism=Trypanosoma_brucei_TREU927 | product=poly(A) export protein, putative (TbGLE2) | location=Tb927_09_v5.1:748592-749769(+) | length=349 | sequence_SO=chromosome | SO=protein_coding	0.98458	0.817394	0.900987	0.125389	1	6	6	6	5	4	5	4	5	4	27.5	27.5	27.5	38.351	349	349	6						9			0	15.795	0.85524	1.0953	35.336	7	0	Median	0.77638	0.98458	9.9112	4	0	Median	1.1144
Tb927.10.4760	Tb927.10.4760	7	7	7	>Tb927.10.4760 | organism=Trypanosoma_brucei_TREU927 | product=hypothetical protein, conserved | location=Tb927_10_v5.1:1196563-1197291(-) | length=242 | sequence_SO=chromosome | SO=protein_coding	0.97834	0.82447	0.901405	0.115402	1	7	7	7	5	3	5	3	5	3	30.6	30.6	30.6	27.159	242	242	7							10		0	36.648	0.85901	1.0054	12.046	9	0	Median	0.78698	0.97834	11.005	6	0	Median	1.036
Tb927.6.400	Tb927.6.400	14	14	13	>Tb927.6.400 | organism=Trypanosoma_brucei_TREU927 | product=peptidase M20/M25/M40, putative | location=Tb927_06_v5.1:189748-192090(+) | length=475 | sequence_SO=chromosome | SO=protein_coding	0.90307	0.901876	0.902473	0.000895574	1	14	14	13	11	12	11	12	11	11	43.2	43.2	41.5	52.185	475	475	5.19					31	3	2		0	94.088	0.84205	1.0056	18.174	33	0	Median	0.69434	0.90307	12.912	18	0	Median	0.99689
Tb927.5.2890	Tb927.5.2890	32	32	32	>Tb927.5.2890 | organism=Trypanosoma_brucei_TREU927 | product=hypothetical protein, conserved | location=Tb927_05_v5.1:963174-969665(-) | length=2163 | sequence_SO=chromosome | SO=protein_coding	0.84027	0.965065	0.902667	0.093596	1	32	32	32	15	29	15	29	15	29	21.2	21.2	21.2	236.85	2163	2163	1.6	35	25	8						0	178.16	0.83101	0.99321	27.258	54	0	Median	0.68203	0.84027	19.619	20	0	Median	0.88247
Tb927.10.5520	Tb927.10.5520	5	5	5	>Tb927.10.5520 | organism=Trypanosoma_brucei_TREU927 | product=hypothetical protein, conserved | location=Tb927_10_v5.1:1385748-1386719(+) | length=323 | sequence_SO=chromosome | SO=protein_coding	0.88169	0.924471	0.90308	0.0320856	1	5	5	5	4	3	4	3	4	3	21.1	21.1	21.1	36.138	323	323	6						7			0	15.52	0.90243	1.0234	18.941	7	0	Median	0.69388	0.88169	19.353	4	0	Median	0.98532
Tb927.11.10430	Tb927.11.10430	10	10	10	>Tb927.11.10430 | organism=Trypanosoma_brucei_TREU927 | product=hypothetical protein, conserved | location=Tb927_11_v5.1:2778115-2779873(+) | length=568 | sequence_SO=chromosome | SO=protein_coding	0.92483	0.882613	0.903721	0.0316631	1	10	10	10	8	7	8	7	8	7	26.6	26.6	26.6	63.675	568	568	4				15					0	19.322	0.86597	1.1162	16.838	15	0	Median	0.72723	0.92483	14.752	8	0	Median	0.93053
Tb927.5.310;Tb11.v5.0208	Tb927.5.310;Tb11.v5.0208	7;6	2;1	2;1	>Tb927.5.310 | organism=Trypanosoma_brucei_TREU927 | product=hypothetical protein | location=Tb927_05_v5.1:74022-76024(-) | length=407 | sequence_SO=chromosome | SO=protein_coding;>Tb11.v5.0208 | organism=Trypanosoma_brucei_TREU927 | product=hypothetical p	0.91316	0.894374	0.903767	0.0140892	2	7	2	2	5	6	2	1	2	1	18.7	6.4	6.4	44.533	407	407;439	4				5					0	3.4102	0.76884	0.98615	11.401	5	0	Median	0.71327	0.91316	6.0639	3	0	Median	0.93321
Tb927.11.15120;REV__Tb927.10.10750	Tb927.11.15120	6;1	6;1	6;1	>Tb927.11.15120 | organism=Trypanosoma_brucei_TREU927 | product=hypothetical protein, conserved | location=Tb927_11_v5.1:4021195-4023366(-) | length=723 | sequence_SO=chromosome | SO=protein_coding	0.92132	0.886918	0.904119	0.0258015	2	6	6	6	4	3	4	3	4	3	11.5	11.5	11.5	78.567	723	723;1570	3.14			6	1					0	12.732	0.82167	0.96484	15.933	6	0	Median	0.71945	0.92132	11.284	3	0	Median	0.97821
Tb927.7.6440	Tb927.7.6440	8	8	8	>Tb927.7.6440 | organism=Trypanosoma_brucei_TREU927 | product=hypothetical protein, conserved | location=Tb927_07_v5.1:1748269-1748937(+) | length=222 | sequence_SO=chromosome | SO=protein_coding	0.9232	0.885269	0.904235	0.0284482	1	8	8	8	8	3	8	3	8	3	58.6	58.6	58.6	25.254	222	222	7.62							6	10	0	22.01	0.83094	0.94482	19.247	13	0	Median	0.74124	0.9232	14.475	8	0	Median	1.0033
Tb927.6.2510	Tb927.6.2510	4	4	4	>Tb927.6.2510 | organism=Trypanosoma_brucei_TREU927 | product=hypothetical protein, conserved | location=Tb927_06_v5.1:762702-763142(+) | length=146 | sequence_SO=chromosome | SO=protein_coding	0.98305	0.827198	0.905124	0.116889	1	4	4	4	3	2	3	2	3	2	32.9	32.9	32.9	16.92	146	146	7.67						1		5	0	4.9316	0.84955	1.0616	13.424	6	0	Median	0.78688	0.98305	8.4541	4	0	Median	1.0448
Tb927.11.1330	Tb927.11.1330	7	7	7	>Tb927.11.1330 | organism=Trypanosoma_brucei_TREU927 | product=hypothetical protein, conserved | location=Tb927_11_v5.1:385812-386147(+) | length=111 | sequence_SO=chromosome | SO=protein_coding	0.90522	0.905305	0.905263	6.38159e-05	1	7	7	7	6	6	6	6	6	6	89.2	89.2	89.2	12.271	111	111	8								15	0	19.512	0.74217	0.938	19.251	15	0	Median	0.71234	0.90522	7.5497	9	0	Median	0.95032
Tb927.6.840	Tb927.6.840	6	6	6	>Tb927.6.840 | organism=Trypanosoma_brucei_TREU927 | product=hypothetical protein, conserved | location=Tb927_06_v5.1:356547-357602(-) | length=351 | sequence_SO=chromosome | SO=protein_coding	0.92971	0.88098	0.905345	0.0365478	1	6	6	6	5	3	5	3	5	3	25.9	25.9	25.9	38.157	351	351	6.5						8	2	2	0	31.07	0.76872	0.96194	11.801	9	0	Median	0.73673	0.92971	9.4887	7	0	Median	1.0306
Tb927.7.5160	Tb927.7.5160	4	4	4	>Tb927.7.5160 | organism=Trypanosoma_brucei_TREU927 | product=deoxyuridine triphosphatase, putative,dUTP diphosphatase | location=Tb927_07_v5.1:1361423-1362286(+) | length=287 | sequence_SO=chromosome | SO=protein_coding	0.9476	0.863483	0.905542	0.0630875	1	4	4	4	2	3	2	3	2	3	13.9	13.9	13.9	31.943	287	287	6.78						5	1	3	0	4.9352	0.89406	1.0238	16.272	8	0	Median	0.73897	0.9476	10.956	3	0	Median	1.0402
Tb927.8.3470	Tb927.8.3470	3	3	3	>Tb927.8.3470 | organism=Trypanosoma_brucei_TREU927 | product=hypothetical protein, conserved | location=Tb927_08_v5.1:1032469-1033173(+) | length=234 | sequence_SO=chromosome | SO=protein_coding	0.91199	0.899685	0.905838	0.00922867	1	3	3	3	3	2	3	2	3	2	21.4	21.4	21.4	26.369	234	234	7.4						1	1	3	0	12.357	0.72217	0.91199	10.834	3	0	Median	0.72217	0.91199	10.834	3	0	Median	1.0005
Tb927.10.1830	Tb927.10.1830	5	5	5	>Tb927.10.1830 | organism=Trypanosoma_brucei_TREU927 | product=syntaxin, putative | location=Tb927_10_v5.1:480135-480827(+) | length=230 | sequence_SO=chromosome | SO=protein_coding	0.93227	0.881446	0.906858	0.0381183	1	5	5	5	5	2	5	2	5	2	33.5	33.5	33.5	25.824	230	230	7.22						1	5	3	0	8.7277	0.7688	0.95721	14.987	6	0	Median	0.75202	0.93227	16.672	5	0	Median	1.0224
Tb927.9.2600	Tb927.9.2600	6	6	6	>Tb927.9.2600 | organism=Trypanosoma_brucei_TREU927 | product=hypothetical protein, conserved | location=Tb927_09_v5.1:576060-577636(-) | length=229 | sequence_SO=chromosome | SO=protein_coding	0.94387	0.870474	0.907172	0.0550473	1	6	6	6	6	2	6	2	6	2	37.1	37.1	37.1	24.515	229	229	7							8		0	53.167	0.78465	0.99315	15.47	8	0	Median	0.74644	0.94387	13.72	6	0	Median	1.0269
Tb927.11.16770	Tb927.11.16770	11	11	11	>Tb927.11.16770 | organism=Trypanosoma_brucei_TREU927 | product=glucosamine-6-phosphate isomerase, putative | location=Tb927_11_v5.1:4462084-4462926(-) | length=280 | sequence_SO=chromosome | SO=protein_coding	0.88128	0.934754	0.908017	0.0401056	1	11	11	11	9	8	9	8	9	8	51.1	51.1	51.1	31.087	280	280	6.17						19	4		0	69.503	0.76566	0.94333	14.225	20	0	Median	0.68974	0.88128	11.689	13	0	Median	0.90906
Tb927.8.4220	Tb927.8.4220	7	7	7	>Tb927.8.4220 | organism=Trypanosoma_brucei_TREU927 | product=hypothetical protein, conserved | location=Tb927_08_v5.1:1250584-1251261(-) | length=225 | sequence_SO=chromosome | SO=protein_coding	0.91582	0.900333	0.908077	0.0116152	1	7	7	7	7	2	7	2	7	2	31.1	31.1	31.1	25.995	225	225	7.82							2	9	0	17.643	0.71491	0.91582	26.265	11	0	Median	0.71491	0.91582	23.108	9	0	Median	0.92265
Tb927.8.1510;Tb927.10.6630	Tb927.8.1510	21;1	21;1	21;1	>Tb927.8.1510 | organism=Trypanosoma_brucei_TREU927 | product=ATP-dependent DEAD/H RNA helicase, putative | location=Tb927_08_v5.1:490106-493862(+) | length=569 | sequence_SO=chromosome | SO=protein_coding	0.82314	0.995322	0.909231	0.129136	2	21	21	21	15	21	15	21	15	21	51.8	51.8	51.8	62.439	569	569;568	4.51				26	27				0	72.757	0.78068	0.92006	19.483	51	0	Median	0.65585	0.82314	18.287	22	0	Median	0.87204
Tb927.3.5530	Tb927.3.5530	55	55	54	>Tb927.3.5530 | organism=Trypanosoma_brucei_TREU927 | product=Tb-292 membrane associated protein (Tb-292) | location=Tb927_03_v5.1:1547383-1554963(+) | length=2463 | sequence_SO=chromosome | SO=protein_coding	0.92084	0.898634	0.909737	0.0166544	1	55	55	54	46	47	46	47	45	46	44.2	44.2	31.2	279.19	2463	2463	1.85	53	91	11	3	1	1	1		0	309.14	0.88711	1.0243	18.686	133	0	Median	0.73371	0.92084	16.587	66	0	Median	0.98299
Tb927.11.1620	Tb927.11.1620	5	5	5	>Tb927.11.1620 | organism=Trypanosoma_brucei_TREU927 | product=hypothetical protein, conserved | location=Tb927_11_v5.1:502007-502585(-) | length=192 | sequence_SO=chromosome | SO=protein_coding	0.98789	0.832848	0.910369	0.116282	1	5	5	5	5	2	5	2	5	2	31.2	31.2	31.2	21.598	192	192	7							7		0	11.009	0.80271	1.0242	7.033	6	0	Median	0.78015	0.98789	7.7659	5	0	Median	1.0518
Tb927.5.930;Tb11.v5.0613	Tb927.5.930;Tb11.v5.0613	44;27	44;27	22;10	>Tb927.5.930 | organism=Trypanosoma_brucei_TREU927 | product=NADH-dependent fumarate reductase (FRDg) | location=Tb927_05_v5.1:366462-369890(+) | length=1142 | sequence_SO=chromosome | SO=protein_coding;>Tb11.v5.0613 | organism=Trypanosoma_brucei_TREU927 |	0.90677	0.915081	0.910925	0.0062329	2	44	44	22	37	29	37	29	18	12	51	51	25.1	123.69	1142	1142;624	2.37	1	66	25	6					0	228.29	0.76793	0.96283	16.495	88	0	Median	0.71876	0.90677	12.596	48	0	Median	0.94018
Tb927.4.5120	Tb927.4.5120	7	5	5	>Tb927.4.5120 | organism=Trypanosoma_brucei_TREU927 | product=hypothetical protein, conserved | location=Tb927_04_v5.1:1400337-1404473(-) | length=1378 | sequence_SO=chromosome | SO=protein_coding	0.82585	0.998801	0.912326	0.129714	1	7	5	5	3	7	1	5	1	5	40.9	33.7	33.7	155.28	1378	1378	1.36	7	4							0	7.2859	0.73065	0.93683	23.666	8	0	Median	0.60819	0.82585	7.6618	2	0	Median	0.81071
Tb927.11.5180	Tb927.11.5180	14	14	14	>Tb927.11.5180 | organism=Trypanosoma_brucei_TREU927 | product=hypothetical protein, conserved | location=Tb927_11_v5.1:1477270-1478022(+) | length=250 | sequence_SO=chromosome | SO=protein_coding	0.99014	0.83619	0.913165	0.115462	1	14	14	14	14	3	14	3	14	3	58	58	58	27.635	250	250	7							21		0	32.031	0.79024	1.0001	11.632	19	0	Median	0.77582	0.99014	10.196	16	0	Median	1.0412
Tb927.10.4000	Tb927.10.4000	6	6	6	>Tb927.10.4000 | organism=Trypanosoma_brucei_TREU927 | product=methylglutaconyl-CoA hydratase, mitochondrial precursor, putative | location=Tb927_10_v5.1:1058124-1058957(-) | length=277 | sequence_SO=chromosome | SO=protein_coding	1.0036	0.82291	0.913255	0.135518	1	6	6	6	5	3	5	3	5	3	31.4	31.4	31.4	29.195	277	277	6.91						3	6	2	0	16.542	0.85649	1.071	15.31	10	0	Median	0.7993	1.0036	16.592	7	0	Median	1.1069
Tb927.11.12680	Tb927.11.12680	4	4	4	>Tb927.11.12680 | organism=Trypanosoma_brucei_TREU927 | product=prefoldin subunit 2, putative | location=Tb927_11_v5.1:3396629-3397066(+) | length=145 | sequence_SO=chromosome | SO=protein_coding	0.91395	0.912825	0.913388	0.000843605	1	4	4	4	4	2	4	2	4	2	29	29	29	15.902	145	145	7.71							2	5	0	14.29	0.79631	0.9578	10.882	5	0	Median	0.72376	0.91395	4.8032	4	2	Median	0.92084
Tb927.7.6280	Tb927.7.6280	9	9	9	>Tb927.7.6280 | organism=Trypanosoma_brucei_TREU927 | product=hypothetical protein, conserved | location=Tb927_07_v5.1:1699655-1701577(-) | length=640 | sequence_SO=chromosome | SO=protein_coding	0.88883	0.938086	0.913458	0.0369422	1	9	9	9	9	5	9	5	9	5	17.8	17.8	17.8	72.053	640	640	4				14					0	15.468	0.79624	0.95314	18.283	12	0	Median	0.70019	0.88883	12.078	8	0	Median	0.9697
Tb927.10.790	Tb927.10.790	5	5	5	>Tb927.10.790 | organism=Trypanosoma_brucei_TREU927 | product=vesicle-associated membrane protein, putative,synaptobrevin, putative (VAMP) | location=Tb927_10_v5.1:203928-204647(+) | length=239 | sequence_SO=chromosome | SO=protein_coding	0.84955	0.977517	0.913534	0.0959753	1	5	5	5	5	2	5	2	5	2	23.4	23.4	23.4	26.489	239	239	6.78						2	7		0	35.394	0.68657	0.86817	17.077	8	0	Median	0.66676	0.84955	13.654	6	0	Median	0.93062
Tb927.5.2640	Tb927.5.2640	5	5	5	>Tb927.5.2640 | organism=Trypanosoma_brucei_TREU927 | product=hypothetical protein, conserved | location=Tb927_05_v5.1:902256-903159(+) | length=277 | sequence_SO=chromosome | SO=protein_coding	0.97826	0.850702	0.914481	0.0956686	1	5	5	5	3	3	3	3	3	3	21.3	21.3	21.3	31.244	277	277	6						6			0	16.382	0.92191	1.0936	13.598	5	0	Median	0.75413	0.97826	13.721	3	0	Median	1.0027
Tb927.5.550	Tb927.5.550	11	11	11	>Tb927.5.550 | organism=Trypanosoma_brucei_TREU927 | product=vacuolar ATP synthase, putative | location=Tb927_05_v5.1:228588-229739(-) | length=383 | sequence_SO=chromosome | SO=protein_coding	0.97845	0.852806	0.915628	0.0942332	1	11	11	11	9	5	9	5	9	5	38.1	38.1	38.1	42.849	383	383	5.83					5	11	2		0	32.252	0.82973	0.99643	15.023	17	0	Median	0.77107	0.97845	13.222	12	0	Median	1.0722
Tb927.1.4690	Tb927.1.4690	4	4	4	>Tb927.1.4690 | organism=Trypanosoma_brucei_TREU927 | product=arginine N-methyltransferase (PRMT1) | location=Tb927_01_v5.1:964186-965223(+) | length=345 | sequence_SO=chromosome | SO=protein_coding	0.88783	0.94402	0.915925	0.0421422	1	4	4	4	2	3	2	3	2	3	18.6	18.6	18.6	39.206	345	345	5.6				1		4			0	25.081	0.831	1.0593	16.096	5	0	Median	0.6922	0.88783	25.865	2	0	Median	0.90434
Tb927.10.6310;Tb11.v5.0275	Tb927.10.6310;Tb11.v5.0275	22;22	22;22	22;22	>Tb927.10.6310 | organism=Trypanosoma_brucei_TREU927 | product=major vault protein, putative (MVP) | location=Tb927_10_v5.1:1595280-1597868(-) | length=862 | sequence_SO=chromosome | SO=protein_coding;>Tb11.v5.0275 | organism=Trypanosoma_brucei_TREU927 | p	0.90772	0.924984	0.916352	0.0129479	2	22	22	22	16	14	16	14	16	14	32.9	32.9	32.9	96.198	862	862;862	3.17			33	2			1		0	102.88	0.83191	0.98391	15.914	35	0	Median	0.72626	0.90772	15.876	16	0	Median	0.90809
Tb927.11.14120	Tb927.11.14120	11	11	11	>Tb927.11.14120 | organism=Trypanosoma_brucei_TREU927 | product=phenylalanyl-tRNA synthetase alpha chain, putative | location=Tb927_11_v5.1:3742709-3744199(+) | length=496 | sequence_SO=chromosome | SO=protein_coding	0.94744	0.886054	0.916747	0.0460399	1	11	11	11	10	8	10	8	10	8	29.6	29.6	29.6	57.056	496	496	5					19				0	22.711	0.81643	1.04	14.927	17	0	Median	0.74357	0.94744	12.756	11	0	Median	1.0233
Tb927.5.3210	Tb927.5.3210	3	3	3	>Tb927.5.3210 | organism=Trypanosoma_brucei_TREU927 | product=small ubiquitin-related modifier, putative (TbSUMO) | location=Tb927_05_v5.1:1055767-1056111(-) | length=114 | sequence_SO=chromosome | SO=protein_coding	0.85504	0.978953	0.916996	0.0929344	1	3	3	3	3	1	3	1	3	1	28.9	28.9	28.9	12.378	114	114	7.8							1	4	0	10.392	0.6937	0.87071	9.4289	4	0	Median	0.68837	0.85504	7.664	3	0	Median	0.91954
Tb927.11.2130	Tb927.11.2130	16	16	16	>Tb927.11.2130 | organism=Trypanosoma_brucei_TREU927 | product=proteasome regulatory non-ATP-ase subunit 3 (RPN3) | location=Tb927_11_v5.1:605650-606813(+) | length=334 | sequence_SO=chromosome | SO=protein_coding	0.94231	0.891742	0.917026	0.0379257	1	16	16	16	12	11	12	11	12	11	60.5	60.5	60.5	38.167	334	334	6						27			0	79.861	0.82194	0.95498	14.635	19	0	Median	0.75435	0.94231	11.977	12	0	Median	1.0183
Tb927.8.6910	Tb927.8.6910	5	5	5	>Tb927.8.6910 | organism=Trypanosoma_brucei_TREU927 | product=cyclophilin, putative | location=Tb927_08_v5.1:1993034-1993621(-) | length=195 | sequence_SO=chromosome | SO=protein_coding	0.94942	0.884956	0.917188	0.0483482	1	5	5	5	5	3	5	3	5	3	34.4	34.4	34.4	21.339	195	195	7							8		0	21.226	0.7603	0.94942	10.786	6	0	Median	0.73387	0.94942	7.6212	4	0	Median	1.0057
Tb927.5.940	Tb927.5.940	31	10	10	>Tb927.5.940 | organism=Trypanosoma_brucei_TREU927 | product=NADH-dependent fumarate reductase, putative | location=Tb927_05_v5.1:371430-373865(+) | length=811 | sequence_SO=chromosome | SO=protein_coding	0.84583	0.988728	0.917279	0.107174	1	31	10	10	26	24	8	8	8	8	50.1	14.8	14.8	87.388	811	811	2.63		13	11	3					0	29.157	0.78269	0.90728	15.23	24	0	Median	0.67638	0.84583	10.415	13	0	Median	0.92115
Tb927.1.1710	Tb927.1.1710	13	13	13	>Tb927.1.1710 | organism=Trypanosoma_brucei_TREU927 | product=hypothetical protein, conserved | location=Tb927_01_v5.1:430943-436303(+) | length=1786 | sequence_SO=chromosome | SO=protein_coding	0.91121	0.923446	0.917328	0.00917723	1	13	13	13	7	10	7	10	7	10	12.6	12.6	12.6	195.44	1786	1786	1.5	10	10							0	46.005	0.84983	1.0284	24.525	17	0	Median	0.73518	0.91121	30.709	8	0	Median	0.94269
Tb927.11.10820	Tb927.11.10820	5	5	5	>Tb927.11.10820 | organism=Trypanosoma_brucei_TREU927 | product=protein kinase ck2 regulatory subunit, putative,casein kinase II beta chain, putative | location=Tb927_11_v5.1:2895189-2896073(+) | length=294 | sequence_SO=chromosome | SO=protein_coding	0.90788	0.927042	0.917461	0.0143714	1	5	5	5	5	3	5	3	5	3	23.8	23.8	23.8	33.52	294	294	6						10			0	13.204	0.9171	1.1246	19.012	5	0	Median	0.71181	0.90788	15.556	3	0	Median	0.96633
Tb927.8.5030	Tb927.8.5030	4	4	4	>Tb927.8.5030 | organism=Trypanosoma_brucei_TREU927 | product=trafficking protein particle complex subunit 3, putative,TRAPP, putative,transport protein particle (TRAPP) component, Bet3, putative | location=Tb927_08_v5.1:1488407-1488988(+) | length=193 | s	0.92076	0.914495	0.917627	0.00469894	1	4	4	4	2	3	2	3	2	3	22.8	22.8	22.8	20.947	193	193	7							7		0	8.4285	0.91264	1.0935	9.5412	3	0	Median	0.72012	0.92076	2.5618	2	1	Median	0.91264
Tb11.02.5380b;Tb11.02.5380	Tb11.02.5380b;Tb11.02.5380	6;6	6;6	6;6	>Tb11.02.5380b | organism=Trypanosoma_brucei_TREU927 | product=exosome complex exonuclease RRP44p homologue, putative | location=Tb927_11_bin_v5.1:650262-653180(+) | length=972 | sequence_SO=random_sequence | SO=protein_coding;>Tb11.02.5380 | organism=Tryp	0.86236	0.972952	0.917656	0.082944	2	6	6	6	6	2	6	2	6	2	11.2	11.2	11.2	108.88	972	972;972	3			8						0	21.787	0.7427	0.93883	17.179	5	0	Median	0.67629	0.86236	19.25	4	0	Median	0.89909
Tb927.8.4820;Tb11.v5.0659	Tb927.8.4820	10;4	10;4	10;4	>Tb927.8.4820 | organism=Trypanosoma_brucei_TREU927 | product=eukaryotic translation initation factor 4 gamma, putative | location=Tb927_08_v5.1:1422184-1424052(-) | length=622 | sequence_SO=chromosome | SO=protein_coding	0.89416	0.941176	0.917668	0.0352624	2	10	10	10	7	7	7	7	7	7	25.2	25.2	25.2	69.338	622	622;441	4				14					0	33.92	0.79762	0.97459	15.933	11	0	Median	0.72239	0.89416	19.569	5	0	Median	0.9702
Tb927.6.1430	Tb927.6.1430	3	3	3	>Tb927.6.1430 | organism=Trypanosoma_brucei_TREU927 | product=hypothetical protein, conserved | location=Tb927_06_v5.1:509214-511523(-) | length=769 | sequence_SO=chromosome | SO=protein_coding	0.97936	0.856604	0.917982	0.0920667	1	3	3	3	2	2	2	2	2	2	6.1	6.1	6.1	87.828	769	769	3			4						0	3.5407	0.88088	1.0432	15.066	4	0	Median	0.78936	0.97936	9.7119	2	0	Median	1.0177
Tb927.5.309b;Tb11.v5.0216	Tb927.5.309b;Tb11.v5.0216	8;8	8;8	3;3	>Tb927.5.309b | organism=Trypanosoma_brucei_TREU927 | product=hypothetical protein | location=Tb927_05_v5.1:131102-132283(-) | length=393 | sequence_SO=chromosome | SO=protein_coding;>Tb11.v5.0216 | organism=Trypanosoma_brucei_TREU927 | product=hypothetica	0.93008	0.905961	0.918021	0.0180891	2	8	8	3	6	8	6	8	3	3	21.4	21.4	8.7	43.143	393	393;393	4				18					0	56.505	0.80612	1.0155	11.556	18	0	Median	0.73695	0.93008	9.3521	9	0	Median	0.94999
Tb927.4.4040	Tb927.4.4040	6	6	6	>Tb927.4.4040 | organism=Trypanosoma_brucei_TREU927 | product=hypothetical protein, conserved | location=Tb927_04_v5.1:1073082-1073861(-) | length=259 | sequence_SO=chromosome | SO=protein_coding	0.92962	0.907935	0.918778	0.0162635	1	6	6	6	3	5	3	5	3	5	23.9	23.9	23.9	30.274	259	259	6.11						8	1		0	17.709	0.93115	1.0603	17.338	9	0	Median	0.71133	0.92962	17.464	4	0	Median	0.99685
Tb927.5.1410;Tb927.5.1390	Tb927.5.1410	10;4	10;4	5;0	>Tb927.5.1410 | organism=Trypanosoma_brucei_TREU927 | product=64 kDa invariant surface glycoprotein (ISG64) | location=Tb927_05_v5.1:508589-509896(-) | length=435 | sequence_SO=chromosome | SO=protein_coding	0.88965	0.947957	0.918804	0.0437304	2	10	10	5	10	6	10	6	5	3	24.6	24.6	17.9	46.895	435	435;434	5.74	1				14		3	5	0	31.505	0.72972	0.94891	14.109	20	0	Median	0.68727	0.88965	10.189	12	0	Median	0.83151
Tb927.10.15540;Tb11.v5.0651	Tb927.10.15540;Tb11.v5.0651	4;3	4;3	4;3	>Tb927.10.15540 | organism=Trypanosoma_brucei_TREU927 | product=predicted VPS53-like domain protein | location=Tb927_10_v5.1:3814068-3816575(+) | length=835 | sequence_SO=chromosome | SO=protein_coding;>Tb11.v5.0651 | organism=Trypanosoma_brucei_TREU927 |	0.90584	0.931966	0.918903	0.0195948	2	4	4	4	4	3	4	3	4	3	7.4	7.4	7.4	93.63	835	835;656	3			7						0	19.488	0.89132	1.073	27.329	7	0	Median	0.7126	0.90584	34.265	4	0	Median	0.89132
Tb927.6.630	Tb927.6.630	4	4	4	>Tb927.6.630 | organism=Trypanosoma_brucei_TREU927 | product=hypothetical protein, conserved | location=Tb927_06_v5.1:258895-261087(-) | length=730 | sequence_SO=chromosome | SO=protein_coding	0.84847	0.989511	0.918991	0.105781	1	4	4	4	3	2	3	2	3	2	8.9	8.9	8.9	78.795	730	730	3.6		1		4					0	4.2834	0.77351	0.96209	11.654	5	0	Median	0.68215	0.84847	10.18	3	0	Median	0.88678
Tb927.8.3970	Tb927.8.3970	3	3	3	>Tb927.8.3970 | organism=Trypanosoma_brucei_TREU927 | product=oxidoreductase, putative | location=Tb927_08_v5.1:1185508-1186884(-) | length=433 | sequence_SO=chromosome | SO=protein_coding	0.85587	0.982511	0.919191	0.094981	1	3	3	3	2	3	2	3	2	3	8.3	8.3	8.3	45.637	433	433	5.8			1		1	1	1	1	0	3.8006	0.83698	0.92383	11.776	5	0	Median	0.67911	0.85587	1.2045	2	0	Median	0.85899
Tb927.6.4990	Tb927.6.4990	8	8	8	>Tb927.6.4990 | organism=Trypanosoma_brucei_TREU927 | product=ATP synthase, epsilon chain, putative | location=Tb927_06_v5.1:1370982-1371530(+) | length=182 | sequence_SO=chromosome | SO=protein_coding	0.98631	0.85266	0.919485	0.100237	1	8	8	8	6	5	6	5	6	5	51.6	51.6	51.6	20.147	182	182	7.08							11	1	0	59.008	0.79183	1.0239	15.194	11	0	Median	0.76326	0.98631	12.995	7	0	Median	0.97842
Tb927.8.6200	Tb927.8.6200	19	19	19	>Tb927.8.6200 | organism=Trypanosoma_brucei_TREU927 | product=tubulin folding cofactor D, putative | location=Tb927_08_v5.1:1802875-1806906(+) | length=1343 | sequence_SO=chromosome | SO=protein_coding	0.95232	0.887311	0.919816	0.0487564	1	19	19	19	16	7	16	7	16	7	18.5	18.5	18.5	147.63	1343	1343	2.04		24	1						0	24.636	0.81582	1.0076	20.309	19	0	Median	0.77422	0.95232	19.235	15	0	Median	1.0119
Tb927.7.3920	Tb927.7.3920	6	6	6	>Tb927.7.3920 | organism=Trypanosoma_brucei_TREU927 | product=hypothetical protein, conserved | location=Tb927_07_v5.1:1024201-1025163(+) | length=320 | sequence_SO=chromosome | SO=protein_coding	1.0259	0.814133	0.920017	0.158825	1	6	6	6	4	2	4	2	4	2	32.5	32.5	32.5	36.085	320	320	6						6			0	7.6266	0.83078	1.0647	18.211	6	0	Median	0.77833	1.0259	14.347	4	0	Median	1.1069
Tb927.4.3320	Tb927.4.3320	12	12	12	>Tb927.4.3320 | organism=Trypanosoma_brucei_TREU927 | product=uracil phosphoribosyltransferase, putative | location=Tb927_04_v5.1:869431-870153(-) | length=240 | sequence_SO=chromosome | SO=protein_coding	0.92591	0.91416	0.920035	0.00881224	1	12	12	12	12	7	12	7	12	7	71.7	71.7	71.7	27.031	240	240	6.86						5	22	1	0	65.288	0.75079	0.94382	18.49	24	0	Median	0.73235	0.92591	10.064	14	0	Median	0.9865
Tb927.10.15410	Tb927.10.15410	2	2	2	>Tb927.10.15410 | organism=Trypanosoma_brucei_TREU927 | product=glycosomal malate dehydrogenase (gMDH) | location=Tb927_10_v5.1:3786037-3787008(+) | length=323 | sequence_SO=chromosome | SO=protein_coding	0.92638	0.914411	0.920396	0.00897666	1	2	2	2	2	1	2	1	2	1	7.4	7.4	7.4	33.71	323	323	6.4						3	2		0	11.181	0.85888	1.0045	13.562	5	0	Median	0.74922	0.92638	12.652	3	0	Median	0.99717
Tb927.11.2190	Tb927.11.2190	3	3	3	>Tb927.11.2190 | organism=Trypanosoma_brucei_TREU927 | product=hypothetical protein, conserved | location=Tb927_11_v5.1:620154-620453(+) | length=99 | sequence_SO=chromosome | SO=protein_coding	1.0142	0.828363	0.921282	0.139378	1	3	3	3	3	2	3	2	3	2	48.5	48.5	48.5	11.175	99	99	8								6	0	5.1894	0.81881	1.0252	14.688	4	0	Median	0.80855	1.0142	1.4213	3	0	Median	1.0653
Tb927.10.3760	Tb927.10.3760	9	9	9	>Tb927.10.3760 | organism=Trypanosoma_brucei_TREU927 | product=vacuolar ATP synthase subunit d, putative | location=Tb927_10_v5.1:976750-977601(-) | length=283 | sequence_SO=chromosome | SO=protein_coding	0.89432	0.95057	0.922445	0.0421878	1	9	9	9	7	6	7	6	7	6	34.6	34.6	34.6	31.285	283	283	7.28						3	7	8	0	42.988	0.81468	0.95242	22.954	16	0	Median	0.69309	0.89432	14.901	10	0	Median	0.91895
Tb927.11.14870	Tb927.11.14870	3	3	3	>Tb927.11.14870 | organism=Trypanosoma_brucei_TREU927 | product=NAD synthase, putative | location=Tb927_11_v5.1:3949082-3949966(-) | length=294 | sequence_SO=chromosome | SO=protein_coding	0.94449	0.901469	0.92298	0.0322655	1	3	3	3	3	1	3	1	3	1	16.7	16.7	16.7	32.916	294	294	6.33						4	2		0	7.5525	0.78341	0.9771	10.156	6	0	Median	0.74431	0.94449	5.8276	4	0	Median	1.0027
Tb927.6.2460	Tb927.6.2460	21	21	21	>Tb927.6.2460 | organism=Trypanosoma_brucei_TREU927 | product=ubiquitin fusion degradation protein 2, putative,ubiquitin conjugation factor E4 B, putative | location=Tb927_06_v5.1:751703-754702(+) | length=999 | sequence_SO=chromosome | SO=protein_coding	0.9585	0.888257	0.923379	0.0526821	1	21	21	21	11	15	11	15	11	15	29.2	29.2	29.2	112.63	999	999	3			27						0	32.836	0.85104	1.0247	24.757	20	0	Median	0.75577	0.9585	15.622	10	0	Median	0.96825
Tb927.11.7150	Tb927.11.7150	5	5	5	>Tb927.11.7150 | organism=Trypanosoma_brucei_TREU927 | product=NGG1 interacting factor 3-like | location=Tb927_11_v5.1:2001908-2002862(-) | length=281 | sequence_SO=chromosome | SO=protein_coding	0.89536	0.952653	0.924007	0.0429699	1	5	5	5	5	2	5	2	5	2	27	27	27	30.459	281	281	6.67						3	6		0	24.733	0.80766	0.89536	17.996	7	0	Median	0.69029	0.89536	14.467	5	0	Median	0.9423
Tb927.11.14950	Tb927.11.14950	6	6	6	>Tb927.11.14950 | organism=Trypanosoma_brucei_TREU927 | product=zinc finger protein 2 (ZFP2) | location=Tb927_11_v5.1:3977262-3977681(-) | length=139 | sequence_SO=chromosome | SO=protein_coding	0.92302	0.925155	0.924087	0.00160122	1	6	6	6	6	4	6	4	6	4	66.9	66.9	66.9	15.767	139	139	7.76							4	13	0	19.693	0.83645	1.0417	12.396	11	0	Median	0.72246	0.92302	10.934	5	0	Median	0.96547
Tb927.11.8090	Tb927.11.8090	10	9	8	>Tb927.11.8090 | organism=Trypanosoma_brucei_TREU927 | product=protein phosphatase 1, putative | location=Tb927_11_v5.1:2267955-2268866(+) | length=303 | sequence_SO=chromosome | SO=protein_coding	1.0209	0.827815	0.924357	0.144814	1	10	9	8	6	9	5	8	5	7	48.5	43.9	40.9	34.443	303	303	6						18			0	53.019	0.85338	1.0694	19.726	13	0	Median	0.78865	1.0209	16.721	6	0	Median	1.0353
Tb927.3.3670	Tb927.3.3670	9	9	9	>Tb927.3.3670 | organism=Trypanosoma_brucei_TREU927 | product=RNA-binding protein, putative (TRRM3) | location=Tb927_03_v5.1:1027144-1029015(+) | length=623 | sequence_SO=chromosome | SO=protein_coding	0.90869	0.940026	0.924358	0.0235022	1	9	9	9	4	8	4	8	4	8	21.2	21.2	21.2	66.931	623	623	2	11						1	1	0	50.575	0.82936	1.0204	22.445	13	0	Median	0.73303	0.90869	28.806	4	0	Median	0.87102
Tb927.6.1270	Tb927.6.1270	4	4	4	>Tb927.6.1270 | organism=Trypanosoma_brucei_TREU927 | product=hypothetical protein, conserved | location=Tb927_06_v5.1:470760-471407(-) | length=215 | sequence_SO=chromosome | SO=protein_coding	0.97732	0.87222	0.92477	0.0788252	1	4	4	4	4	2	4	2	4	2	30.7	30.7	30.7	23.703	215	215	7							6		0	36.147	0.81779	1.0301	12.698	6	0	Median	0.76499	0.97732	9.8605	4	0	Median	0.95665
Tb927.10.520	Tb927.10.520	7	7	7	>Tb927.10.520 | organism=Trypanosoma_brucei_TREU927 | product=hypothetical protein, conserved | location=Tb927_10_v5.1:134180-135370(+) | length=396 | sequence_SO=chromosome | SO=protein_coding	1.0921	0.759129	0.925614	0.249729	1	7	7	7	6	2	6	2	6	2	22.2	22.2	22.2	46.781	396	396	5.75					2	6			0	6.899	0.86496	1.1022	22.031	7	0	Median	0.82253	1.0921	22.555	6	0	Median	1.1605
Tb927.9.3820	Tb927.9.3820	6	6	6	>Tb927.9.3820 | organism=Trypanosoma_brucei_TREU927 | product=syntaxin, putative | location=Tb927_09_v5.1:755001-755855(+) | length=284 | sequence_SO=chromosome | SO=protein_coding	0.85418	0.997208	0.925694	0.107271	1	6	6	6	6	2	6	2	6	2	17.6	17.6	17.6	31.106	284	284	7						6		6	0	8.2757	0.75179	0.87589	14.847	10	0	Median	0.68364	0.85418	15.7	7	0	Median	0.90803
Tb927.6.950	Tb927.6.950	37	37	37	>Tb927.6.950 | organism=Trypanosoma_brucei_TREU927 | product=cysteinyl-tRNA synthetase, putative | location=Tb927_06_v5.1:401460-403890(-) | length=785 | sequence_SO=chromosome | SO=protein_coding	0.9122	0.93932	0.92576	0.0203399	1	37	37	37	27	31	27	31	27	31	57.3	57.3	57.3	89.376	785	785	3.21		1	68	10		1		1	0	242.23	0.85569	0.99118	19.044	68	0	Median	0.72114	0.9122	10.092	27	0	Median	0.91203
Tb927.9.15050	Tb927.9.15050	4	3	3	>Tb927.9.15050 | organism=Trypanosoma_brucei_TREU927 | product=trypanin-related protein, putative | location=Tb927_09_v5.1:2349174-2350559(+) | length=461 | sequence_SO=chromosome | SO=protein_coding	1.0107	0.84246	0.92658	0.12618	1	4	3	3	3	3	2	2	2	2	8.9	7.4	7.4	54.165	461	461	5					4				0	7.6285	0.87193	1.0241	20.482	4	0	Median	0.80555	1.0107	10.731	2	0	Median	1.0825
Tb927.8.1590	Tb927.8.1590	21	21	21	>Tb927.8.1590 | organism=Trypanosoma_brucei_TREU927 | product=ubiquitin-protein ligase, putative (upl3) | location=Tb927_08_v5.1:516817-529731(+) | length=4304 | sequence_SO=chromosome | SO=protein_coding	0.97757	0.876885	0.927228	0.0755135	1	21	21	21	19	9	19	9	19	9	6.8	6.8	6.8	470.71	4304	4304	1.89	5	30	1						0	52	0.82505	1.0191	25.848	27	0	Median	0.78987	0.97757	24.841	17	0	Median	1.0254
Tb927.4.1930;REV__Tb927.11.13360	Tb927.4.1930	11;1	11;1	11;1	>Tb927.4.1930 | organism=Trypanosoma_brucei_TREU927 | product=RNA-binding protein, putative (EIF3D) | location=Tb927_04_v5.1:490369-491187(-) | length=272 | sequence_SO=chromosome | SO=protein_coding	0.88946	0.965065	0.927262	0.0567035	2	11	11	11	9	6	9	6	9	6	47.8	47.8	47.8	31.293	272	272;1281	6.9						13	6	10	0	88.987	0.75083	0.92941	19.376	25	0	Median	0.69407	0.88946	12.763	15	0	Median	0.90494
Tb927.5.1730	Tb927.5.1730	6	6	6	>Tb927.5.1730 | organism=Trypanosoma_brucei_TREU927 | product=inhibitor of serine peptidase (ISP), putative,ecotin family (I11), putative | location=Tb927_05_v5.1:602593-603090(+) | length=165 | sequence_SO=chromosome | SO=protein_coding	0.93757	0.917095	0.927332	0.0153565	1	6	6	6	6	5	6	5	6	5	55.8	55.8	55.8	19.342	165	165	7.12							14	2	0	22.054	0.75672	0.95948	9.3187	14	0	Median	0.72547	0.93757	6.7159	9	0	Median	0.91283
Tb927.10.12130	Tb927.10.12130	15	15	15	>Tb927.10.12130 | organism=Trypanosoma_brucei_TREU927 | product=hypothetical protein, conserved | location=Tb927_10_v5.1:2956367-2958718(+) | length=783 | sequence_SO=chromosome | SO=protein_coding	0.95852	0.896941	0.927731	0.0461839	1	15	15	15	6	14	6	14	6	14	34.5	34.5	34.5	87.529	783	783	3			21						0	62.921	0.89208	0.98393	18.628	18	0	Median	0.72901	0.95852	5.9115	6	0	Median	1.0081
Tb927.6.1400;Tb927.6.1380;Tb927.6.1360;Tb927.6.1340;Tb927.6.1320	Tb927.6.1400	3;1;1;1;1	3;1;1;1;1	3;1;1;1;1	>Tb927.6.1400 | organism=Trypanosoma_brucei_TREU927 | product=cyclophilin-type peptidyl-prolyl cis-trans isomerase, putative (PPIase) | location=Tb927_06_v5.1:505727-506509(-) | length=260 | sequence_SO=chromosome | SO=protein_coding	1.0118	0.844452	0.928126	0.125511	5	3	3	3	3	2	3	2	3	2	16.2	16.2	16.2	28.779	260	260;204;204;204;204	7						2	3	2	0	16.517	0.88821	1.0157	16.569	7	0	Median	0.81964	1.0118	14.459	5	0	Median	1.0611
Tb927.9.11230	Tb927.9.11230	6	6	6	>Tb927.9.11230 | organism=Trypanosoma_brucei_TREU927 | product=calmodulin-like protein, putative,EF hand containing protein | location=Tb927_09_v5.1:1776292-1776717(+) | length=141 | sequence_SO=chromosome | SO=protein_coding	0.9019	0.954472	0.928186	0.0394288	1	6	6	6	5	5	5	5	5	5	55.3	55.3	55.3	15.86	141	141	8								11	0	21.771	0.77692	0.96692	18.145	9	0	Median	0.71018	0.9019	19.8	5	0	Median	0.8811
Tb927.6.4760	Tb927.6.4760	7	7	7	>Tb927.6.4760 | organism=Trypanosoma_brucei_TREU927 | product=hypothetical protein, conserved | location=Tb927_06_v5.1:1324506-1327007(+) | length=794 | sequence_SO=chromosome | SO=protein_coding	0.89882	0.958405	0.928613	0.0446889	1	7	7	7	5	3	5	3	5	3	15.5	15.5	15.5	89.074	794	794	3			9						0	23.888	0.73732	0.92866	16.513	8	0	Median	0.70581	0.89882	17.469	6	0	Median	0.95203
Tb927.7.2950	Tb927.7.2950	4	4	4	>Tb927.7.2950 | organism=Trypanosoma_brucei_TREU927 | product=hypothetical protein, conserved | location=Tb927_07_v5.1:740636-742648(+) | length=670 | sequence_SO=chromosome | SO=protein_coding	0.93711	0.920556	0.928833	0.0124155	1	4	4	4	2	2	2	2	2	2	11.2	11.2	11.2	74.103	670	670	4				4					0	9.5723	0.81664	0.96429	17.082	4	0	Median	0.74227	0.93711	10.551	2	0	Median	0.92391
Tb927.5.3900	Tb927.5.3900	5	5	5	>Tb927.5.3900 | organism=Trypanosoma_brucei_TREU927 | product=hypothetical protein, conserved | location=Tb927_05_v5.1:1269555-1271789(+) | length=744 | sequence_SO=chromosome | SO=protein_coding	1.0142	0.845309	0.929754	0.126669	1	5	5	5	3	2	3	2	3	2	7.7	7.7	7.7	82.986	744	744	3			6						0	3.4924	0.80609	1.0142	20.033	6	0	Median	0.80609	1.0142	10.767	4	0	Median	1.0412
Tb927.7.1630	Tb927.7.1630	8	8	8	>Tb927.7.1630 | organism=Trypanosoma_brucei_TREU927 | product=hypothetical protein, conserved | location=Tb927_07_v5.1:408581-409177(+) | length=198 | sequence_SO=chromosome | SO=protein_coding	0.96885	0.89214	0.930495	0.0575323	1	8	8	8	8	5	8	5	8	5	51	51	51	22.379	198	198	7							15		0	20.802	0.78816	1.0185	11.112	9	0	Median	0.7625	0.96885	10.327	7	0	Median	0.96291
Tb927.6.4260	Tb927.6.4260	3	3	3	>Tb927.6.4260 | organism=Trypanosoma_brucei_TREU927 | product=hypothetical protein, conserved | location=Tb927_06_v5.1:1215043-1216017(-) | length=323 | sequence_SO=chromosome | SO=protein_coding	1.0191	0.842602	0.930851	0.132374	1	3	3	3	2	3	2	3	2	3	13.3	13.3	13.3	34.251	323	323	4.88				3	3	2			0	15.465	0.8491	1.0335	9.0194	7	0	Median	0.81224	1.0191	5.1681	4	0	Median	0.97578
Tb927.8.980	Tb927.8.980	26	26	26	>Tb927.8.980 | organism=Trypanosoma_brucei_TREU927 | product=phosphoacetylglucosamine mutase, putative,acetylglucosaminephosphomutase, putative,N-acetylglucosamine-phosphate mutase, putative | location=Tb927_08_v5.1:311350-313161(-) | length=602 | sequence	0.94154	0.920471	0.931006	0.0158015	1	26	26	26	23	22	23	22	23	22	60.3	60.3	60.3	64.95	602	602	4.38				49		6	2	1	0	84.974	0.83781	1.0129	13.138	54	0	Median	0.7422	0.94154	8.7013	26	0	Median	0.96517
Tb927.10.1250	Tb927.10.1250	8	8	8	>Tb927.10.1250 | organism=Trypanosoma_brucei_TREU927 | product=hypothetical protein, conserved | location=Tb927_10_v5.1:335940-336725(-) | length=261 | sequence_SO=chromosome | SO=protein_coding	0.95488	0.909091	0.931985	0.0343418	1	8	8	8	8	6	8	6	8	6	39.5	39.5	39.5	29.381	261	261	6.21		1				6	7		0	84.48	0.85127	1.0393	23.022	12	0	Median	0.74647	0.95488	23.767	6	0	Median	0.96726
Tb927.10.9250	Tb927.10.9250	11	11	11	>Tb927.10.9250 | organism=Trypanosoma_brucei_TREU927 | product=G-actin binding protein, putative,CAP/Srv2p, putative | location=Tb927_10_v5.1:2291789-2292598(+) | length=269 | sequence_SO=chromosome | SO=protein_coding	0.97744	0.887784	0.932612	0.0672419	1	11	11	11	9	9	9	9	9	9	45	45	45	29.333	269	269	6.38						16	7	1	0	43.791	0.85603	1.0523	19.339	21	0	Median	0.77139	0.97744	18.387	12	0	Median	0.97066
Tb927.1.540	Tb927.1.540	11	11	11	>Tb927.1.540 | organism=Trypanosoma_brucei_TREU927 | product=DNA-directed RNA polymerase III, putative,RNA polymerase subunit, putative (RPC128) | location=Tb927_01_v5.1:204418-207807(-) | length=1129 | sequence_SO=chromosome | SO=protein_coding	0.92238	0.943218	0.932799	0.0156287	1	11	11	11	11	2	11	2	11	2	13.6	13.6	13.6	126.58	1129	1129	2		13							0	27.126	0.74247	0.94552	12.777	12	0	Median	0.73481	0.92238	12.977	10	0	Median	0.91048
Tb927.8.1790	Tb927.8.1790	2	2	2	>Tb927.8.1790 | organism=Trypanosoma_brucei_TREU927 | product=hypothetical protein, conserved | location=Tb927_08_v5.1:588779-589249(-) | length=156 | sequence_SO=chromosome | SO=protein_coding	0.9233	0.942418	0.932859	0.0143387	1	2	2	2	1	2	1	2	1	2	10.9	10.9	10.9	17.441	156	156	6.8						1	4		0.0011834	2.162	0.8727	1.0281	10.375	4	0	Median	0.7384	0.9233	11.82	2	0	Median	0.95911
Tb927.11.600	Tb927.11.600	3	3	3	>Tb927.11.600 | organism=Trypanosoma_brucei_TREU927 | product=hypothetical protein, conserved | location=Tb927_11_v5.1:146673-146993(-) | length=106 | sequence_SO=chromosome | SO=protein_coding	1.0322	0.833542	0.932871	0.148994	1	3	3	3	3	3	3	3	3	3	20.8	20.8	20.8	12.081	106	106	8								6	0.0022875	1.6891	0.93624	1.1352	7.1299	5	0	Median	0.82698	1.0322	13.658	3	1	Median	1.1093
Tb927.11.7100	Tb927.11.7100	9	9	9	>Tb927.11.7100 | organism=Trypanosoma_brucei_TREU927 | product=cytoplasmic translation machinery associated protein, putative | location=Tb927_11_v5.1:1990982-1991593(-) | length=203 | sequence_SO=chromosome | SO=protein_coding	1.0044	0.861846	0.933123	0.106915	1	9	9	9	9	3	9	3	9	3	45.8	45.8	45.8	22.711	203	203	7							14		0	15.473	0.81327	1.0097	10.43	11	0	Median	0.81058	1.0044	10.883	10	0	Median	1.0032
Tb927.9.7230	Tb927.9.7230	4	4	4	>Tb927.9.7230 | organism=Trypanosoma_brucei_TREU927 | product=ADP-ribosylation factor-like protein, putative (ARL1B) | location=Tb927_09_v5.1:1174742-1175323(+) | length=193 | sequence_SO=chromosome | SO=protein_coding	0.89047	0.976372	0.933421	0.0644264	1	4	4	4	2	4	2	4	2	4	22.8	22.8	22.8	21.093	193	193	7							6		0	27.652	0.84564	1.0242	24.428	6	0	Median	0.71977	0.89047	25.606	2	0	Median	0.88202
Tb927.11.13750	Tb927.11.13750	8	7	7	>Tb927.11.13750 | organism=Trypanosoma_brucei_TREU927 | product=small GTPase, putative,ras-related rab-4 (RAB4) | location=Tb927_11_v5.1:3668958-3670113(+) | length=198 | sequence_SO=chromosome | SO=protein_coding	0.96198	0.904895	0.933438	0.0428134	1	8	7	7	6	6	5	5	5	5	58.1	52.5	52.5	22.057	198	198	7							13		0	21.502	0.85889	1.0776	16.787	7	0	Median	0.74729	0.96198	19.238	4	0	Median	0.92117
Tb927.10.16110;Tb11.v5.0527	Tb927.10.16110;Tb11.v5.0527	9;9	9;9	9;9	>Tb927.10.16110 | organism=Trypanosoma_brucei_TREU927 | product=hypothetical protein, conserved | location=Tb927_10_v5.1:3963160-3964320(+) | length=386 | sequence_SO=chromosome | SO=protein_coding;>Tb11.v5.0527 | organism=Trypanosoma_brucei_TREU927 | prod	0.98321	0.883704	0.933457	0.0746291	2	9	9	9	7	6	7	6	7	6	32.1	32.1	32.1	42.99	386	386;386	5.54					6	7			0	36.573	0.8762	1.0647	13.938	13	0	Median	0.77703	0.98321	17.358	7	0	Median	0.99736
Tb927.9.5590	Tb927.9.5590	19	19	19	>Tb927.9.5590 | organism=Trypanosoma_brucei_TREU927 | product=DNA topoisomerase ii (TOP2) | location=Tb927_09_v5.1:961067-964732(+) | length=1221 | sequence_SO=chromosome | SO=protein_coding	0.95373	0.913409	0.933569	0.0302409	1	19	19	19	18	11	18	11	18	11	24.2	24.2	24.2	137.56	1221	1221	2		31							0	78.151	0.84971	1.0429	15.267	27	0	Median	0.75607	0.95373	15.57	17	0	Median	0.98226
Tb927.7.4900;Tb11.v5.0171	Tb927.7.4900;Tb11.v5.0171	48;48	48;48	48;48	>Tb927.7.4900 | organism=Trypanosoma_brucei_TREU927 | product=5-3 exonuclease XRNA, putative,exoribonuclease 1, putative (XRNA) | location=Tb927_07_v5.1:1287020-1291276(-) | length=1418 | sequence_SO=chromosome | SO=protein_coding;>Tb11.v5.0171 | organis	0.92367	0.943574	0.933622	0.0149282	2	48	48	48	44	27	44	27	44	27	52.9	52.9	52.9	158.67	1418	1418;1418	2.18		78	10	3					0	155.09	0.77566	0.9476	17.526	75	0	Median	0.72903	0.92367	13.888	45	0	Median	0.9353
Tb927.11.2320	Tb927.11.2320	30	30	30	>Tb927.11.2320 | organism=Trypanosoma_brucei_TREU927 | product=hypothetical protein, conserved | location=Tb927_11_v5.1:663645-667298(+) | length=1217 | sequence_SO=chromosome | SO=protein_coding	0.98285	0.884721	0.933785	0.0735968	1	30	30	30	28	16	28	16	28	16	33.4	33.4	33.4	138.83	1217	1217	2		44							0	161.1	0.82952	1.0274	13.1	36	0	Median	0.7888	0.98285	10.051	23	0	Median	1.022
Tb927.3.1800	Tb927.3.1800	18	18	18	>Tb927.3.1800 | organism=Trypanosoma_brucei_TREU927 | product=hypothetical protein, conserved | location=Tb927_03_v5.1:465260-469645(-) | length=1461 | sequence_SO=chromosome | SO=protein_coding	0.93315	0.934667	0.933908	0.00113759	1	18	18	18	13	11	13	11	13	11	14.9	14.9	14.9	161.94	1461	1461	2.16	1	22		1	1				0	33.945	0.80604	0.97081	23.201	20	0	Median	0.74129	0.93315	10.854	11	0	Median	0.89219
Tb927.3.980	Tb927.3.980	6	6	6	>Tb927.3.980 | organism=Trypanosoma_brucei_TREU927 | product=hypothetical protein, conserved | location=Tb927_03_v5.1:240544-242646(+) | length=700 | sequence_SO=chromosome | SO=protein_coding	0.92461	0.944198	0.934404	0.0146909	1	6	6	6	3	5	3	5	3	5	13.4	13.4	13.4	78.463	700	700	4				8					0	10.086	0.91643	1.0224	21	8	0	Median	0.73267	0.92461	19.527	3	0	Median	0.96015
Tb927.9.3280	Tb927.9.3280	11	11	11	>Tb927.9.3280 | organism=Trypanosoma_brucei_TREU927 | product=acidocalcisomal exopolyphosphatase | location=Tb927_09_v5.1:693332-694483(+) | length=383 | sequence_SO=chromosome | SO=protein_coding	0.95458	0.914829	0.934705	0.029813	1	11	11	11	8	6	8	6	8	6	34.7	34.7	34.7	42.865	383	383	6.12						15		1	0	49.905	0.77467	0.97476	15.579	14	0	Median	0.73509	0.95458	14.264	8	0	Median	0.95713
Tb927.6.3140	Tb927.6.3140	2	2	2	>Tb927.6.3140 | organism=Trypanosoma_brucei_TREU927 | product=hypothetical protein, conserved | location=Tb927_06_v5.1:925945-926232(+) | length=95 | sequence_SO=chromosome | SO=protein_coding	1.0475	0.82203	0.934765	0.169102	1	2	2	2	2	2	2	2	2	2	36.8	36.8	36.8	10.622	95	95	8								4	0	12.485	0.86204	1.0696	13.282	4	0	Median	0.81875	1.0475	2.1118	2	0	Median	1.0101
Tb927.10.10880	Tb927.10.10880	21	21	21	>Tb927.10.10880 | organism=Trypanosoma_brucei_TREU927 | product=ATP-binding cassette protein, putative,ABC transporter, putative,ATPase, putative | location=Tb927_10_v5.1:2652394-2654448(-) | length=684 | sequence_SO=chromosome | SO=protein_coding	0.91349	0.957304	0.935397	0.0328607	1	21	21	21	11	16	11	16	11	16	50.9	50.9	50.9	77.697	684	684	3.97			1	30					0	29.742	0.8358	1.0053	40.7	25	0	Median	0.7064	0.91349	18.76	11	0	Median	0.87358
Tb927.6.2360;Tb927.6.2300	Tb927.6.2360;Tb927.6.2300	17;13	17;13	17;13	>Tb927.6.2360 | organism=Trypanosoma_brucei_TREU927 | product=adenosine kinase, putative | location=Tb927_06_v5.1:727282-728319(+) | length=345 | sequence_SO=chromosome | SO=protein_coding;>Tb927.6.2300 | organism=Trypanosoma_brucei_TREU927 | product=adeno	0.97739	0.893895	0.935642	0.0626215	2	17	17	17	13	11	13	11	13	11	47.5	47.5	47.5	37.958	345	345;345	6						25			0	48.912	0.90428	1.0349	13.976	24	0	Median	0.76952	0.97739	15.754	13	0	Median	0.96509
Tb927.10.6780	Tb927.10.6780	8	8	8	>Tb927.10.6780 | organism=Trypanosoma_brucei_TREU927 | product=vacuolar protein sorting-associated protein 45, putative (VPS45) | location=Tb927_10_v5.1:1707275-1709044(+) | length=589 | sequence_SO=chromosome | SO=protein_coding	0.95856	0.913492	0.936026	0.0338008	1	8	8	8	5	5	5	5	5	5	20.5	20.5	20.5	64.974	589	589	4.18				9	2				0	21.738	0.77823	1.0039	11.478	9	0	Median	0.76613	0.95856	8.1919	5	0	Median	0.90606
Tb927.10.6960;Tb927.10.6920;Tb10.v4.0248	Tb927.10.6960;Tb927.10.6920;Tb10.v4.0248	8;7;7	8;7;7	8;7;7	>Tb927.10.6960 | organism=Trypanosoma_brucei_TREU927 | product=hypothetical protein, conserved | location=Tb927_10_v5.1:1755170-1756132(+) | length=320 | sequence_SO=chromosome | SO=protein_coding;>Tb927.10.6920 | organism=Trypanosoma_brucei_TREU927 | prod	0.8902	0.982029	0.936114	0.0688717	3	8	8	8	5	4	5	4	5	4	29.7	29.7	29.7	36.056	320	320;320;320	6						11			0	10.728	0.85393	0.9909	17.509	8	0	Median	0.69456	0.8902	21.034	5	0	Median	0.89407
Tb927.10.4710	Tb927.10.4710	8	8	8	>Tb927.10.4710 | organism=Trypanosoma_brucei_TREU927 | product=proteasome beta 2 subunit, putative,20S proteasome subunit | location=Tb927_10_v5.1:1187414-1188034(-) | length=206 | sequence_SO=chromosome | SO=protein_coding	0.92539	0.94697	0.93618	0.0161848	1	8	8	8	6	7	6	7	6	7	43.7	43.7	43.7	22.776	206	206	7							17		0	33.806	0.82556	0.99566	10.52	16	0	Median	0.72933	0.92539	6.8189	8	0	Median	0.91122
Tb927.5.1100	Tb927.5.1100	11	11	11	>Tb927.5.1100 | organism=Trypanosoma_brucei_TREU927 | product=peroxisome targeting signal 1 receptor (TbPEX5) | location=Tb927_05_v5.1:415484-417451(+) | length=655 | sequence_SO=chromosome | SO=protein_coding	0.92857	0.943841	0.936206	0.0114536	1	11	11	11	6	10	6	10	6	10	30.4	30.4	30.4	72.095	655	655	4.21				17	1		1		0	45.548	0.86752	1.0442	17.644	17	0	Median	0.74247	0.92857	12.817	5	0	Median	0.95603
Tb927.6.3280	Tb927.6.3280	3	3	3	>Tb927.6.3280 | organism=Trypanosoma_brucei_TREU927 | product=cyclosome subunit 1, putative | location=Tb927_06_v5.1:966763-972276(+) | length=1837 | sequence_SO=chromosome | SO=protein_coding	0.83795	1.03666	0.937303	0.14903	1	3	3	3	2	2	2	2	2	2	2.4	2.4	2.4	202.2	1837	1837	2		4							0	7.1421	0.77394	0.90753	9.2295	4	0	Median	0.66813	0.83795	6.5106	2	0	Median	0.82884
Tb927.6.2340;Tb927.6.2280	Tb927.6.2340;Tb927.6.2280	10;10	10;10	10;10	>Tb927.6.2340 | organism=Trypanosoma_brucei_TREU927 | product=hypothetical protein, conserved | location=Tb927_06_v5.1:723018-723457(+) | length=139 | sequence_SO=chromosome | SO=protein_coding;>Tb927.6.2280 | organism=Trypanosoma_brucei_TREU927 | product=	0.91058	0.964041	0.937311	0.0400959	2	10	10	10	9	6	9	6	9	6	61.2	61.2	61.2	16.282	139	139;139	8								21	0	49.846	0.74712	0.93789	13.311	19	0	Median	0.73266	0.91058	10.925	13	0	Median	0.90091
Tb927.10.6840	Tb927.10.6840	3	3	3	>Tb927.10.6840 | organism=Trypanosoma_brucei_TREU927 | product=hypothetical protein, conserved | location=Tb927_10_v5.1:1722287-1723174(+) | length=295 | sequence_SO=chromosome | SO=protein_coding	0.99986	0.87512	0.93749	0.0935548	1	3	3	3	3	2	3	2	3	2	15.6	15.6	15.6	34.255	295	295	5.5				2		3	1		0	12.802	0.83917	1.0612	10.425	6	0	Median	0.80019	0.99986	9.0294	4	0	Median	0.97451
Tb927.11.4950	Tb927.11.4950	8	8	8	>Tb927.11.4950 | organism=Trypanosoma_brucei_TREU927 | product=hypothetical protein, conserved | location=Tb927_11_v5.1:1409821-1412181(+) | length=786 | sequence_SO=chromosome | SO=protein_coding	1.0207	0.854555	0.937627	0.124609	1	8	8	8	6	4	6	4	6	4	15.1	15.1	15.1	88.74	786	786	3.15			11	2					0	33.913	0.86734	1.0793	19.23	8	0	Median	0.8055	1.0207	18.956	5	0	Median	1.0719
Tb927.11.15040	Tb927.11.15040	9	7	7	>Tb927.11.15040 | organism=Trypanosoma_brucei_TREU927 | product=chaperonin HSP60, mitochondrial precursor, putative,heat shock protein 60 (Cpn60) | location=Tb927_11_v5.1:3999845-4001629(-) | length=594 | sequence_SO=chromosome | SO=protein_coding	0.94947	0.926012	0.937741	0.0175937	1	9	7	7	9	4	7	2	7	2	19.9	18.2	18.2	64.159	594	594	4				10					0	11.302	0.82831	1.0155	15.669	6	0	Median	0.7472	0.94947	11.441	4	0	Median	0.964
Tb927.11.6050	Tb927.11.6050	10	10	10	>Tb927.11.6050 | organism=Trypanosoma_brucei_TREU927 | product=hypothetical protein, conserved | location=Tb927_11_v5.1:1708041-1713164(-) | length=1707 | sequence_SO=chromosome | SO=protein_coding	0.95697	0.919118	0.938044	0.0283893	1	10	10	10	4	7	4	7	4	7	9.9	9.9	9.9	189.56	1707	1707	1.58	5	7							0	23.684	0.96655	1.088	20.58	9	0	Median	0.78237	0.95697	27.789	4	2	Median	0.96655
Tb927.8.4160	Tb927.8.4160	5	5	5	>Tb927.8.4160 | organism=Trypanosoma_brucei_TREU927 | product=hypothetical protein, conserved | location=Tb927_08_v5.1:1223367-1227104(-) | length=1245 | sequence_SO=chromosome | SO=protein_coding	1.0088	0.867905	0.938352	0.105671	1	5	5	5	5	2	5	2	5	2	5.7	5.7	5.7	135.52	1245	1245	2		7							0	7.1951	0.89971	1.1078	8.0479	7	0	Median	0.82205	1.0088	7.3792	5	0	Median	1.0297
Tb927.8.7490	Tb927.8.7490	25	25	2	>Tb927.8.7490 | organism=Trypanosoma_brucei_TREU927 | product=hypothetical protein, conserved | location=Tb927_08_v5.1:2157670-2162007(+) | length=1445 | sequence_SO=chromosome | SO=protein_coding	0.94014	0.93668	0.93841	0.0025947	1	25	25	2	21	17	21	17	2	2	25.7	25.7	2.9	157.97	1445	1445	2.26		39	1	2				1	0	104.72	0.82354	0.99069	34.081	37	0	Median	0.76599	0.94014	22.669	21	0	Median	0.91816
Tb927.1.240;Tb927.2.1160	Tb927.1.240	11;2	2;0	0;0	>Tb927.1.240 | organism=Trypanosoma_brucei_TREU927 | product=retrotransposon hot spot protein (RHS, pseudogene), putative | location=Tb927_01_v5.1:91365-99080(-) | length=2572 | sequence_SO=chromosome | SO=protein_coding	0.95409	0.923105	0.938598	0.0232385	2	11	2	0	7	9	2	1	0	0	6.6	1	0	283.49	2572	2572;330	3			5						0	10.793	0.76343	0.96401	17.189	5	0	Median	0.75734	0.95409	17.135	3	0	Median	0.97873
Tb927.10.2270	Tb927.10.2270	29	29	29	>Tb927.10.2270 | organism=Trypanosoma_brucei_TREU927 | product=vacuolar protein sorting-associated protein 35, putative | location=Tb927_10_v5.1:587863-590664(+) | length=933 | sequence_SO=chromosome | SO=protein_coding	0.93625	0.941708	0.938979	0.00409369	1	29	29	29	20	24	20	24	20	24	42.8	42.8	42.8	104.36	933	933	3			52						0	179.34	0.81456	0.97617	10.858	43	0	Median	0.73591	0.93625	8.4417	20	0	Median	0.93172
Tb927.8.2070;Tb927.8.2270	Tb927.8.2070;Tb927.8.2270	11;10	1;0	1;0	>Tb927.8.2070 | organism=Trypanosoma_brucei_TREU927 | product=hypothetical protein, conserved | location=Tb927_08_v5.1:654365-654964(+) | length=199 | sequence_SO=chromosome | SO=protein_coding;>Tb927.8.2270 | organism=Trypanosoma_brucei_TREU927 | product=	0.99221	0.886054	0.939132	0.0796174	2	11	1	1	10	10	1	1	1	1	83.4	10.1	10.1	21.799	199	199;199	7.25							6	2	0	4.2548	0.77276	1.0152	8.6291	8	0	Median	0.74709	0.99221	4.1971	5	0	Median	0.90558
Tb927.5.950	Tb927.5.950	10	10	10	>Tb927.5.950 | organism=Trypanosoma_brucei_TREU927 | product=monothiol glutaredoxin, putative | location=Tb927_05_v5.1:378044-378712(+) | length=222 | sequence_SO=chromosome | SO=protein_coding	0.91906	0.960523	0.939791	0.0310969	1	10	10	10	9	6	9	6	9	6	37.8	37.8	37.8	24.515	222	222	7.09							20	2	0	114.03	0.81713	0.97594	9.8386	21	0	Median	0.72125	0.91906	9.9188	12	0	Median	0.88937
Tb927.10.3150	Tb927.10.3150	4	4	4	>Tb927.10.3150 | organism=Trypanosoma_brucei_TREU927 | product=N-acetyltransferase, putative | location=Tb927_10_v5.1:822204-822821(+) | length=205 | sequence_SO=chromosome | SO=protein_coding	0.96392	0.915751	0.939835	0.0361268	1	4	4	4	3	3	3	3	3	3	18.5	18.5	18.5	23.621	205	205	7							7		0	9.2993	0.85105	1.0231	14.962	6	0	Median	0.75799	0.96392	7.899	3	0	Median	0.97386
Tb927.11.2300;Tb927.11.16840.1;Tb927.11.16840.2	Tb927.11.2300	18;1;1	18;1;1	18;1;1	>Tb927.11.2300 | organism=Trypanosoma_brucei_TREU927 | product=eukaryotic peptide chain release factor subunit 1, putative (ERF1) | location=Tb927_11_v5.1:656382-657740(+) | length=452 | sequence_SO=chromosome | SO=protein_coding	0.95991	0.920048	0.939979	0.0298966	3	18	18	18	17	11	17	11	17	11	39.4	39.4	39.4	50.976	452	452;910;920	5.19					29	1	1	1	0	56.1	0.79962	0.96746	13.946	24	0	Median	0.74602	0.95991	11.474	16	0	Median	0.9152
Tb927.7.3980	Tb927.7.3980	15	15	15	>Tb927.7.3980 | organism=Trypanosoma_brucei_TREU927 | product=immunodominant antigen, putative,tc40 antigen-like | location=Tb927_07_v5.1:1047000-1049714(+) | length=904 | sequence_SO=chromosome | SO=protein_coding	0.93583	0.944912	0.940371	0.00681124	1	15	15	15	6	14	6	14	6	14	26.4	26.4	26.4	97.32	904	904	3.67			20		3	4			0	80.319	0.81535	0.97605	16.313	22	0	Median	0.74891	0.93583	16.051	10	0	Median	0.91994
Tb927.10.11530	Tb927.10.11530	3	3	3	>Tb927.10.11530 | organism=Trypanosoma_brucei_TREU927 | product=hypothetical protein, conserved | location=Tb927_10_v5.1:2811743-2812048(+) | length=101 | sequence_SO=chromosome | SO=protein_coding	1.0054	0.876732	0.941066	0.0965013	1	3	3	3	2	3	2	3	2	3	32.7	32.7	32.7	11.032	101	101	8								5	0	14.245	0.73494	0.90547	15.114	4	0	Median	0.79251	1.0054	0.12596	2	0	Median	0.68925
Tb927.10.5630	Tb927.10.5630	6	6	6	>Tb927.10.5630 | organism=Trypanosoma_brucei_TREU927 | product=hypothetical protein, conserved | location=Tb927_10_v5.1:1406244-1406801(+) | length=185 | sequence_SO=chromosome | SO=protein_coding	1.0219	0.860956	0.941428	0.120708	1	6	6	6	6	3	6	3	6	3	34.1	34.1	34.1	21.709	185	185	7							10		0	11.515	0.82414	1.0291	8.8191	8	0	Median	0.81265	1.0219	3.8658	5	0	Median	1.0337
Tb927.2.2120	Tb927.2.2120	5	5	5	>Tb927.2.2120 | organism=Trypanosoma_brucei_TREU927 | product=protein kinase, putative,NIMA/Nek Serine/threonine-protein kinase family, putative | location=Tb927_02_v5.1:403330-404691(-) | length=453 | sequence_SO=chromosome | SO=protein_coding	0.95421	0.92885	0.94153	0.0190199	1	5	5	5	2	5	2	5	2	5	14.8	14.8	14.8	50.602	453	453	5.45					8	1	2		0	24.125	0.85999	1.0665	20.471	8	0	Median	0.74474	0.95421	25.562	4	0	Median	0.95105
Tb927.7.1790	Tb927.7.1790	8	8	8	>Tb927.7.1790 | organism=Trypanosoma_brucei_TREU927 | product=Adenine phosphoribosyltransferase, putative | location=Tb927_07_v5.1:438274-438966(+) | length=230 | sequence_SO=chromosome | SO=protein_coding	0.95371	0.929973	0.941842	0.0178027	1	8	8	8	6	5	6	5	6	5	51.3	51.3	51.3	25.624	230	230	7							12		0	54.495	0.77214	0.95969	14.684	12	0	Median	0.7381	0.95371	15.957	7	0	Median	0.89263
Tb927.11.3220	Tb927.11.3220	10	10	10	>Tb927.11.3220 | organism=Trypanosoma_brucei_TREU927 | product=metacaspase,cysteine peptidase, Clan CD, family C13 (mca1) | location=Tb927_11_v5.1:915041-916159(-) | length=372 | sequence_SO=chromosome | SO=protein_coding	1.0001	0.883626	0.941863	0.0873552	1	10	10	10	9	10	9	10	9	10	38.4	38.4	38.4	40.18	372	372	5.97					8	19	3	2	0	38.259	0.87885	1.0687	15.258	28	0	Median	0.79282	1.0001	13.326	14	0	Median	0.97005
Tb927.2.4590;Tb11.v5.0820;Tb927.2.4610	Tb927.2.4590;Tb11.v5.0820;Tb927.2.4610	20;18;18	20;18;18	20;18;18	>Tb927.2.4590 | organism=Trypanosoma_brucei_TREU927 | product=branched-chain amino acid aminotransferase, putative | location=Tb927_02_v5.1:816649-817752(-) | length=367 | sequence_SO=chromosome | SO=protein_coding;>Tb11.v5.0820 | organism=Trypanosoma_bruc	0.82994	1.05412	0.942029	0.168134	3	20	20	20	19	18	19	18	19	18	59.9	59.9	59.9	40.432	367	367;342;367	6.47						55	14	12	0	135.8	0.71307	0.89156	14.153	76	0	Median	0.65309	0.82994	12.799	42	0	Median	0.83747
Tb927.5.3510	Tb927.5.3510	36	36	36	>Tb927.5.3510 | organism=Trypanosoma_brucei_TREU927 | product=structural maintenance of chromosome 3 , putative (SMC3) | location=Tb927_05_v5.1:1159531-1163130(+) | length=1199 | sequence_SO=chromosome | SO=protein_coding	1.0165	0.867679	0.942089	0.111616	1	36	36	36	34	15	34	15	34	15	30.7	30.7	30.7	136.37	1199	1199	2		52							0	87.31	0.83877	1.0404	14.696	38	0	Median	0.79193	1.0165	14.808	26	0	Median	1.0164
Tb927.3.2490	Tb927.3.2490	45	45	45	>Tb927.3.2490 | organism=Trypanosoma_brucei_TREU927 | product=hypothetical protein, conserved | location=Tb927_03_v5.1:626648-629539(+) | length=963 | sequence_SO=chromosome | SO=protein_coding	0.94716	0.937031	0.942096	0.00759639	1	45	45	45	43	25	43	25	43	25	49.7	49.7	49.7	110.07	963	963	2.09		73	5	1					0	163.52	0.81002	1.004	16.177	64	0	Median	0.75956	0.94716	16.371	41	0	Median	0.94621
Tb927.9.11850	Tb927.9.11850	48	48	48	>Tb927.9.11850 | organism=Trypanosoma_brucei_TREU927 | product=structural maintenance of chromosome 1, putative (SMC1) | location=Tb927_09_v5.1:1847890-1851717(+) | length=1275 | sequence_SO=chromosome | SO=protein_coding	0.99414	0.890155	0.942147	0.0779888	1	48	48	48	45	20	45	20	45	20	41.7	41.7	41.7	144.54	1275	1275	2		71							0	225.09	0.80414	1.0185	16.965	64	0	Median	0.79444	0.99414	17.551	48	0	Median	0.98631
Tb927.9.10920	Tb927.9.10920	5	5	5	>Tb927.9.10920 | organism=Trypanosoma_brucei_TREU927 | product=protein kinase, putative | location=Tb927_09_v5.1:1718064-1721240(-) | length=1058 | sequence_SO=chromosome | SO=protein_coding	1.0169	0.867528	0.942214	0.112029	1	5	5	5	3	3	3	3	3	3	7.8	7.8	7.8	118.15	1058	1058	2		6							0	5.9173	0.88018	1.0561	11.783	5	0	Median	0.80973	1.0169	10.366	3	0	Median	0.99346
Tb927.11.14330	Tb927.11.14330	26	26	26	>Tb927.11.14330 | organism=Trypanosoma_brucei_TREU927 | product=hypothetical protein, conserved | location=Tb927_11_v5.1:3808658-3813487(+) | length=1609 | sequence_SO=chromosome | SO=protein_coding	0.90392	0.981547	0.942733	0.0582202	1	26	26	26	13	23	13	23	13	23	20.8	20.8	20.8	176.83	1609	1609	2.22	7	28	12	3					0	127.14	0.82029	0.98382	21.398	42	0	Median	0.73785	0.90392	20.039	20	0	Median	0.86149
Tb927.9.1970	Tb927.9.1970	7	7	7	>Tb927.9.1970 | organism=Trypanosoma_brucei_TREU927 | product=syntaxin binding protein 1, putative | location=Tb927_09_v5.1:445805-447733(-) | length=642 | sequence_SO=chromosome | SO=protein_coding	1.0134	0.872524	0.942962	0.105657	1	7	7	7	4	4	4	4	4	4	15.6	15.6	15.6	71.788	642	642	5.33				6				3	0	12.603	0.83322	1.0495	11.398	7	0	Median	0.80608	1.0134	5.813	3	0	Median	1.0447
Tb927.8.6640	Tb927.8.6640	4	4	4	>Tb927.8.6640 | organism=Trypanosoma_brucei_TREU927 | product=hypothetical protein, conserved | location=Tb927_08_v5.1:1917890-1919704(-) | length=604 | sequence_SO=chromosome | SO=protein_coding	1.1487	0.738007	0.943354	0.308019	1	4	4	4	2	4	2	4	2	4	8.4	8.4	8.4	67.498	604	604	4				6					0	8.777	1.1129	1.3082	36.844	6	0	Median	0.92163	1.1487	16.871	2	0	Median	1.1938
Tb927.10.5050	Tb927.10.5050	2	2	2	>Tb927.10.5050 | organism=Trypanosoma_brucei_TREU927 | product=hypothetical protein, conserved | location=Tb927_10_v5.1:1249171-1249398(+) | length=75 | sequence_SO=chromosome | SO=protein_coding	0.97079	0.916422	0.943606	0.0407758	1	2	2	2	2	2	2	2	2	2	29.3	29.3	29.3	8.6908	75	75	8								5	0	8.3253	0.84602	1.0481	7.8417	4	0	Median	0.76189	0.97079	6.724	2	0	Median	0.90996
Tb11.v5.0670	Tb11.v5.0670	13	2	1	>Tb11.v5.0670 | organism=Trypanosoma_brucei_TREU927 | product=retrotransposon hot spot (RHS) protein, putative | location=Tb927_11_bin_v5.1:3336238-3337128(+) | length=296 | sequence_SO=random_sequence | SO=protein_coding	0.96824	0.919118	0.943679	0.0368418	1	13	2	1	10	11	2	2	1	1	65.2	16.2	8.1	34.014	296	296	3.1		1	7	2					0	46.482	0.79551	1.0169	13.391	8	0	Median	0.75332	0.96824	6.9183	4	0	Median	0.90784
Tb927.10.200	Tb927.10.200	2	2	2	>Tb927.10.200 | organism=Trypanosoma_brucei_TREU927 | product=vacuolar ATP synthase, putative | location=Tb927_10_v5.1:74522-75097(+) | length=191 | sequence_SO=chromosome | SO=protein_coding	1.0088	0.87858	0.94369	0.0976648	1	2	2	2	1	2	1	2	1	2	11.5	11.5	11.5	19.38	191	191	7.83							1	5	0	14.29	0.88064	1.0673	10.045	5	0	Median	0.81031	1.0088	8.5465	3	0	Median	1.0149
Tb927.2.4540	Tb927.2.4540	11	11	11	>Tb927.2.4540 | organism=Trypanosoma_brucei_TREU927 | product=Small nuclear ribonucleoprotein-associated protein B (snRNP-B) (Sm protein B) (Sm-B) (SmB), putative (TbSmB) | location=Tb927_02_v5.1:807816-808145(-) | length=109 | sequence_SO=chromosome | SO=	0.96518	0.922254	0.943717	0.0321945	1	11	11	11	10	5	10	5	10	5	75.2	75.2	75.2	12.331	109	109	8								18	0	53.904	0.84431	0.98001	14.893	17	0	Median	0.75904	0.96518	16.229	12	0	Median	0.94108
Tb927.11.7470	Tb927.11.7470	5	5	5	>Tb927.11.7470 | organism=Trypanosoma_brucei_TREU927 | product=hypothetical protein, conserved | location=Tb927_11_v5.1:2120572-2121315(-) | length=247 | sequence_SO=chromosome | SO=protein_coding	1.0194	0.868056	0.943728	0.113508	1	5	5	5	3	4	3	4	3	4	34.8	34.8	34.8	26.198	247	247	7.71						1		6	0	11.501	0.87618	1.0399	21.109	6	0	Median	0.80876	1.0194	14.605	3	0	Median	1.0269
Tb927.11.3970	Tb927.11.3970	5	5	5	>Tb927.11.3970 | organism=Trypanosoma_brucei_TREU927 | product=hypothetical protein, conserved | location=Tb927_11_v5.1:1159933-1162122(+) | length=729 | sequence_SO=chromosome | SO=protein_coding	1.0823	0.805542	0.943921	0.207568	1	5	5	5	4	2	4	2	4	2	10.2	10.2	10.2	78.028	729	729	6.89				1		1	4	3	0	14.009	0.92034	1.0823	16.15	9	0	Median	0.86145	1.0823	16.142	7	0	Median	1.1015
Tb927.10.4040	Tb927.10.4040	7	7	7	>Tb927.10.4040 | organism=Trypanosoma_brucei_TREU927 | product=3-keto-dihydrosphingosine reductase | location=Tb927_10_v5.1:1063662-1064708(-) | length=348 | sequence_SO=chromosome | SO=protein_coding	1.0228	0.865202	0.944001	0.118199	1	7	7	7	6	4	6	4	6	4	28.2	28.2	28.2	38.045	348	348	6						11			0	26.52	0.80626	1.047	20.554	7	0	Median	0.80284	1.0228	13.426	4	0	Median	1.049
Tb927.9.10560	Tb927.9.10560	2	2	2	>Tb927.9.10560 | organism=Trypanosoma_brucei_TREU927 | product=hypothetical protein, conserved | location=Tb927_09_v5.1:1660453-1660959(-) | length=168 | sequence_SO=chromosome | SO=protein_coding	0.97205	0.916674	0.944362	0.0415318	1	2	2	2	2	2	2	2	2	2	27.4	27.4	27.4	19.035	168	168	7.4							3	2	0	27.39	0.80347	0.99203	9.484	5	0	Median	0.78144	0.97205	6.3659	3	0	Median	0.97167
Tb927.9.9670	Tb927.9.9670	14	14	14	>Tb927.9.9670 | organism=Trypanosoma_brucei_TREU927 | product=proteasome alpha 1 subunit, putative,20S proteasome subunit alpha-6, (putative) (TbPSA6) | location=Tb927_09_v5.1:1540119-1540871(-) | length=250 | sequence_SO=chromosome | SO=protein_coding	0.96498	0.9243	0.94464	0.0305101	1	14	14	14	14	5	14	5	14	5	60.4	60.4	60.4	27.543	250	250	6.74						6	17		0	45.81	0.84491	1.0006	12.247	18	0	Median	0.77294	0.96498	13.93	13	0	Median	0.9299
Tb927.8.1560	Tb927.8.1560	4	4	4	>Tb927.8.1560 | organism=Trypanosoma_brucei_TREU927 | product=hypothetical protein, conserved | location=Tb927_08_v5.1:508257-510107(+) | length=616 | sequence_SO=chromosome | SO=protein_coding	0.94672	0.942596	0.944658	0.00309307	1	4	4	4	3	4	3	4	3	4	13.8	13.8	13.8	69.483	616	616	4.3				9			1		0	9.3579	0.88833	0.98389	13.756	10	0	Median	0.75657	0.94672	3.1079	4	0	Median	0.97073
Tb927.11.440	Tb927.11.440	5	5	5	>Tb927.11.440 | organism=Trypanosoma_brucei_TREU927 | product=hypothetical protein, conserved | location=Tb927_11_v5.1:97129-98010(-) | length=293 | sequence_SO=chromosome | SO=protein_coding	0.91816	0.971628	0.944894	0.0401013	1	5	5	5	4	5	4	5	4	5	19.8	19.8	19.8	33.107	293	293	2.92	1	9	1					2	0	20.953	0.74694	0.92026	10.509	11	0	Median	0.71617	0.91816	5.3547	5	0	Median	0.89302
Tb927.4.4910	Tb927.4.4910	8	8	6	>Tb927.4.4910 | organism=Trypanosoma_brucei_TREU927 | product=3,2-trans-enoyl-CoA isomerase, mitochondrial precursor, putative | location=Tb927_04_v5.1:1344760-1345962(-) | length=400 | sequence_SO=chromosome | SO=protein_coding	1.0093	0.881446	0.945373	0.0958908	1	8	8	6	7	3	7	3	5	3	28.2	28.2	26	45.333	400	400	5.94			1		2	10	2	1	0	26.825	0.84592	1.0288	18.709	14	0	Median	0.79369	1.0093	13.735	10	0	Median	1.0279
Tb927.3.4910	Tb927.3.4910	2	2	2	>Tb927.3.4910 | organism=Trypanosoma_brucei_TREU927 | product=signal peptide peptidase, putative,aspartic peptidase, clan AD, family A22B, putative | location=Tb927_03_v5.1:1377662-1378720(+) | length=352 | sequence_SO=chromosome | SO=protein_coding	0.92175	0.969462	0.945606	0.035784	1	2	2	2	2	1	2	1	2	1	8.2	8.2	8.2	38.674	352	352	4.83	1			1		4			0	2.5234	0.80695	0.98284	9.8226	4	0	Median	0.71065	0.92175	2.2433	2	1	Median	0.86049
Tb927.9.2900	Tb927.9.2900	28	28	28	>Tb927.9.2900 | organism=Trypanosoma_brucei_TREU927 | product=hypothetical protein, conserved | location=Tb927_09_v5.1:654509-662404(-) | length=2631 | sequence_SO=chromosome | SO=protein_coding	0.88406	1.00805	0.946057	0.0929958	1	28	28	28	12	26	12	26	12	26	15.1	15.1	15.1	287.19	2631	2631	1.37	31	18							0	224.78	0.82332	0.95532	13.424	42	0	Median	0.7128	0.88406	14.495	17	0	Median	0.85467
Tb927.6.5080	Tb927.6.5080	5	5	5	>Tb927.6.5080 | organism=Trypanosoma_brucei_TREU927 | product=hypothetical protein, conserved | location=Tb927_06_v5.1:1386635-1388335(+) | length=566 | sequence_SO=chromosome | SO=protein_coding	0.98948	0.902935	0.946207	0.0649091	1	5	5	5	4	3	4	3	4	3	13.6	13.6	13.6	65.003	566	566	4.43				4	3				0	12.553	0.8132	1.0535	9.2874	7	0	Median	0.78593	0.98948	8.3352	4	0	Median	1.0088
Tb927.2.5850	Tb927.2.5850	7	7	7	>Tb927.2.5850 | organism=Trypanosoma_brucei_TREU927 | product=small nuclear ribonucleoprotein SmD2 (Sm-D2) | location=Tb927_02_v5.1:1058716-1059083(+) | length=111 | sequence_SO=chromosome | SO=protein_coding	0.96831	0.924471	0.94639	0.0328794	1	7	7	7	6	4	6	4	6	4	61.3	61.3	61.3	12.518	111	111	8								13	0	67.887	0.79037	0.98711	12.902	10	0	Median	0.76849	0.96831	11.483	6	0	Median	0.91021
Tb927.11.13870	Tb927.11.13870	9	9	9	>Tb927.11.13870 | organism=Trypanosoma_brucei_TREU927 | product=hypothetical protein, conserved | location=Tb927_11_v5.1:3687052-3687621(+) | length=189 | sequence_SO=chromosome | SO=protein_coding	1.0138	0.879275	0.946538	0.100893	1	9	9	9	7	4	7	4	7	4	64	64	64	21.129	189	189	7							15		0	41.14	0.81775	1.0227	12.076	11	0	Median	0.79668	1.0138	6.785	6	0	Median	0.94558
Tb927.6.3160	Tb927.6.3160	4	4	4	>Tb927.6.3160 | organism=Trypanosoma_brucei_TREU927 | product=splicing factor 3a, putative | location=Tb927_06_v5.1:942151-943779(+) | length=542 | sequence_SO=chromosome | SO=protein_coding	1.004	0.889205	0.946603	0.0860962	1	4	4	4	4	2	4	2	4	2	15.5	15.5	15.5	61.529	542	542	4				6					0	8.0539	0.84332	1.0373	12.347	4	0	Median	0.80109	1.004	15.052	3	0	Median	0.94585
Tb927.4.2310	Tb927.4.2310	33	33	33	>Tb927.4.2310 | organism=Trypanosoma_brucei_TREU927 | product=asparaginyl-tRNA synthetase, putative | location=Tb927_04_v5.1:601224-603245(+) | length=667 | sequence_SO=chromosome | SO=protein_coding	0.8826	1.01071	0.946657	0.0960852	1	33	33	33	26	29	26	29	26	29	55.5	55.5	55.5	75.462	667	667	4.21				62			2	2	0	91.874	0.811	0.94746	18.456	60	0	Median	0.70078	0.8826	21.719	27	0	Median	0.85464
Tb927.11.14220	Tb927.11.14220	4	4	4	>Tb927.11.14220 | organism=Trypanosoma_brucei_TREU927 | product=hypothetical protein, conserved | location=Tb927_11_v5.1:3772204-3774039(+) | length=516 | sequence_SO=chromosome | SO=protein_coding	0.95348	0.93985	0.946665	0.0102228	1	4	4	4	3	2	3	2	3	2	11.6	11.6	11.6	54.405	516	516	7.62							3	5	0	10.938	0.81271	1.0045	16.183	7	0	Median	0.76658	0.95348	18.874	4	0	Median	0.9667
Tb927.11.11430	Tb927.11.11430	13	13	13	>Tb927.11.11430 | organism=Trypanosoma_brucei_TREU927 | product=cullin 1, putative | location=Tb927_11_v5.1:3060388-3062805(+) | length=805 | sequence_SO=chromosome | SO=protein_coding	0.96374	0.929627	0.946684	0.0255846	1	13	13	13	7	10	7	10	7	10	20.6	20.6	20.6	91.936	805	805	3			17						0	66.055	0.89514	1.0136	14.165	15	0	Median	0.77022	0.96374	13.081	6	0	Median	0.9269
Tb927.9.5900	Tb927.9.5900	47	47	47	>Tb927.9.5900 | organism=Trypanosoma_brucei_TREU927 | product=glutamate dehydrogenase (GDH) | location=Tb927_09_v5.1:995225-998285(+) | length=992 | sequence_SO=chromosome | SO=protein_coding	1.0647	0.828775	0.946738	0.176944	1	47	47	47	38	38	38	38	38	38	58.8	58.8	58.8	112.11	992	992	2.96	8	4	89	12		1			0	296.77	0.88181	1.1014	11.798	100	0	Median	0.8386	1.0647	9.3895	58	0	Median	1.0639
Tb927.3.5010	Tb927.3.5010	16	16	16	>Tb927.3.5010 | organism=Trypanosoma_brucei_TREU927 | product=hypothetical protein, conserved | location=Tb927_03_v5.1:1406292-1406873(+) | length=193 | sequence_SO=chromosome | SO=protein_coding	0.98518	0.908348	0.946764	0.0576242	1	16	16	16	15	7	15	7	15	7	55.4	55.4	55.4	23.423	193	193	6.74						7	20		0	41.018	0.79911	1.0216	11.428	24	0	Median	0.78078	0.98518	10.569	18	0	Median	0.97288
Tb927.9.15090	Tb927.9.15090	9	9	9	>Tb927.9.15090 | organism=Trypanosoma_brucei_TREU927 | product=cytosolic coat protein, putative | location=Tb927_09_v5.1:2356154-2356813(+) | length=219 | sequence_SO=chromosome | SO=protein_coding	0.98086	0.912992	0.946926	0.0509011	1	9	9	9	8	7	8	7	8	7	45.2	45.2	45.2	24.595	219	219	7							19		0	28.532	0.81101	1.0189	11.103	18	0	Median	0.77367	0.98086	7.7836	10	0	Median	0.96762
Tb927.2.4930	Tb927.2.4930	13	13	13	>Tb927.2.4930 | organism=Trypanosoma_brucei_TREU927 | product=esterase, putative | location=Tb927_02_v5.1:870376-871113(-) | length=245 | sequence_SO=chromosome | SO=protein_coding	0.99704	0.897183	0.947111	0.0748929	1	13	13	13	13	5	13	5	13	5	46.5	46.5	46.5	27.191	245	245	7							23		0	26.677	0.80116	1.0029	10.122	18	0	Median	0.78927	0.99704	9.2189	13	0	Median	0.97686
Tb927.11.8950	Tb927.11.8950	18	18	18	>Tb927.11.8950 | organism=Trypanosoma_brucei_TREU927 | product=leucine rich repeat (TbLRRP1) | location=Tb927_11_v5.1:2454099-2456240(+) | length=713 | sequence_SO=chromosome | SO=protein_coding	0.96747	0.9273	0.947385	0.0301277	1	18	18	18	13	13	13	13	13	13	35.5	35.5	35.5	78.96	713	713	3.93			2	27					0	42.235	0.82891	1.0268	25.413	27	0	Median	0.76717	0.96747	30.259	15	0	Median	0.9458
Tb927.10.10030	Tb927.10.10030	5	5	5	>Tb927.10.10030 | organism=Trypanosoma_brucei_TREU927 | product=hypothetical protein, conserved | location=Tb927_10_v5.1:2472584-2472886(+) | length=100 | sequence_SO=chromosome | SO=protein_coding	0.7783	1.11674	0.947522	0.253833	1	5	5	5	4	3	4	3	4	3	38	38	38	11.38	100	100	8								7	0	14.73	0.74684	0.85486	29.062	6	0	Median	0.61081	0.7783	19.194	3	0	Median	0.79828
Tb927.11.16970	Tb927.11.16970	10	10	10	>Tb927.11.16970 | organism=Trypanosoma_brucei_TREU927 | product=protein phosphatase 4, putative | location=Tb927_11_v5.1:4524496-4525407(-) | length=303 | sequence_SO=chromosome | SO=protein_coding	0.98778	0.907276	0.947528	0.0603777	1	10	10	10	7	8	7	8	7	8	52.8	52.8	52.8	34.432	303	303	6						17			0	57.57	0.81667	1.0145	18.456	13	0	Median	0.78518	0.98778	17.841	7	0	Median	0.97563
Tb927.6.2420	Tb927.6.2420	9	9	9	>Tb927.6.2420 | organism=Trypanosoma_brucei_TREU927 | product=p22 protein precursor | location=Tb927_06_v5.1:743387-744070(+) | length=227 | sequence_SO=chromosome | SO=protein_coding	1.031	0.86408	0.94754	0.12519	1	9	9	9	9	6	9	6	9	6	45.4	45.4	45.4	25.349	227	227	6.86	1						18	3	0	55.473	0.88276	1.1018	27.102	17	0	Median	0.81012	1.031	31.017	12	0	Median	0.99656
Tb927.11.11590	Tb927.11.11590	15	15	15	>Tb927.11.11590 | organism=Trypanosoma_brucei_TREU927 | product=eukaryotic translation initiation factor, putative | location=Tb927_11_v5.1:3108243-3109775(+) | length=413 | sequence_SO=chromosome | SO=protein_coding	0.947	0.948317	0.947658	0.000987553	1	15	15	15	11	10	11	10	11	10	42.4	42.4	42.4	46.677	413	413	5.58					10	14			0	112.19	0.77859	1.0008	11.358	16	0	Median	0.73314	0.947	6.8259	9	0	Median	0.96164
Tb927.11.900	Tb927.11.900	28	28	25	>Tb927.11.900 | organism=Trypanosoma_brucei_TREU927 | product=isocitrate dehydrogenase, putative (IDH) | location=Tb927_11_v5.1:230567-231808(+) | length=413 | sequence_SO=chromosome | SO=protein_coding	0.98384	0.911993	0.947916	0.0538855	1	28	28	25	19	25	19	25	17	23	67.8	67.8	61.7	46.77	413	413	5.95	2				32	33	4	17	0	216.12	0.85042	1.0129	18.225	80	0	Median	0.78013	0.98384	19.762	41	0	Median	0.99013
Tb927.5.960	Tb927.5.960	9	9	9	>Tb927.5.960 | organism=Trypanosoma_brucei_TREU927 | product=hypothetical protein, conserved | location=Tb927_05_v5.1:379155-381201(+) | length=335 | sequence_SO=chromosome | SO=protein_coding	0.90841	0.987459	0.947935	0.059287	1	9	9	9	7	5	7	5	7	5	41.2	41.2	41.2	37.159	335	335	6						12			0	30.151	0.75298	0.94642	21.407	10	0	Median	0.72097	0.90841	23.294	6	0	Median	0.90572
Tb927.4.3350	Tb927.4.3350	4	4	4	>Tb927.4.3350 | organism=Trypanosoma_brucei_TREU927 | product=hypothetical protein, conserved | location=Tb927_04_v5.1:873796-875049(-) | length=417 | sequence_SO=chromosome | SO=protein_coding	0.93078	0.965531	0.948155	0.0260629	1	4	4	4	2	4	2	4	2	4	14.9	14.9	14.9	47.244	417	417	5.33					4	2			0	25.043	0.90881	1.0121	14.246	6	0	Median	0.73748	0.93078	7.8704	2	0	Median	0.94748
Tb927.4.1230	Tb927.4.1230	7	7	7	>Tb927.4.1230 | organism=Trypanosoma_brucei_TREU927 | product=hypothetical protein | location=Tb927_04_v5.1:329172-329960(-) | length=262 | sequence_SO=chromosome | SO=protein_coding	0.92788	0.968804	0.948342	0.0306934	1	7	7	7	4	6	4	6	4	6	25.2	25.2	25.2	30.297	262	262	3			12						0	15.853	0.83189	0.97359	8.6792	10	0	Median	0.71729	0.92788	7.1295	4	0	Median	0.90277
Tb927.10.11930	Tb927.10.11930	9	9	9	>Tb927.10.11930 | organism=Trypanosoma_brucei_TREU927 | product=beta-D-hydroxybutyrate dehydrogenase | location=Tb927_10_v5.1:2907661-2908443(+) | length=260 | sequence_SO=chromosome | SO=protein_coding	0.93848	0.958497	0.948489	0.0150128	1	9	9	9	8	2	8	2	8	2	47.7	47.7	47.7	27.645	260	260	6.85						2	11		0	23.911	0.75403	0.95575	26.26	12	0	Median	0.73377	0.93848	23.22	9	0	Median	0.87398
Tb927.7.7070;Tb11.v5.0612	Tb927.7.7070;Tb11.v5.0612	17;17	17;17	17;17	>Tb927.7.7070 | organism=Trypanosoma_brucei_TREU927 | product=hypothetical protein, conserved | location=Tb927_07_v5.1:2019858-2021189(-) | length=443 | sequence_SO=chromosome | SO=protein_coding;>Tb11.v5.0612 | organism=Trypanosoma_brucei_TREU927 | produc	0.92016	0.978091	0.949125	0.0434481	2	17	17	17	14	11	14	11	14	11	46.7	46.7	46.7	49.45	443	443;443	5.92					22	3	3	8	0	122.46	0.8069	0.96624	14.729	32	0	Median	0.73645	0.92016	12.753	17	0	Median	0.93938
Tb927.3.1680	Tb927.3.1680	13	13	13	>Tb927.3.1680 | organism=Trypanosoma_brucei_TREU927 | product=hypothetical protein, conserved | location=Tb927_03_v5.1:443368-444324(-) | length=318 | sequence_SO=chromosome | SO=protein_coding	0.92179	0.976944	0.949367	0.0413656	1	13	13	13	12	9	12	9	12	9	50.6	50.6	50.6	35.191	318	318	6.14						26	2	1	0	94.863	0.7514	0.93508	21.147	27	0	Median	0.69213	0.92179	22.241	18	0	Median	0.92888
Tb927.11.1700	Tb927.11.1700	9	9	9	>Tb927.11.1700 | organism=Trypanosoma_brucei_TREU927 | product=hypothetical protein, conserved | location=Tb927_11_v5.1:518427-520139(-) | length=570 | sequence_SO=chromosome | SO=protein_coding	0.94673	0.952018	0.949374	0.00396621	1	9	9	9	7	9	7	9	7	9	26.3	26.3	26.3	61.63	570	570	4				16					0	21.757	0.86813	1.003	25.102	16	0	Median	0.74146	0.94673	34.561	7	0	Median	0.87226
Tb927.11.11570	Tb927.11.11570	7	7	7	>Tb927.11.11570 | organism=Trypanosoma_brucei_TREU927 | product=guanine-nucleotide-exchange-factor,translation initiation factor eIF-2B subunit | location=Tb927_11_v5.1:3102890-3105292(+) | length=800 | sequence_SO=chromosome | SO=protein_coding	0.99846	0.900739	0.949599	0.073291	1	7	7	7	6	4	6	4	6	4	15.2	15.2	15.2	87.632	800	800	3.18			10		1				0	28.956	0.88932	1.046	16.253	10	0	Median	0.80501	0.99846	15.848	6	0	Median	0.98217
Tb927.11.4690	Tb927.11.4690	3	3	3	>Tb927.11.4690 | organism=Trypanosoma_brucei_TREU927 | product=mitochondrial DNA polymerase I protein B (POLIB) | location=Tb927_11_v5.1:1352395-1356609(+) | length=1404 | sequence_SO=chromosome | SO=protein_coding	1.038	0.861846	0.949923	0.132115	1	3	3	3	3	2	3	2	3	2	2.8	2.8	2.8	158.71	1404	1404	2		5							0	16	0.92635	1.0896	6.6456	4	0	Median	0.84441	1.038	0.76321	2	0	Median	1.032
Tb927.10.14320	Tb927.10.14320	29	29	29	>Tb927.10.14320 | organism=Trypanosoma_brucei_TREU927 | product=hypothetical protein, conserved | location=Tb927_10_v5.1:3479456-3482857(-) | length=1133 | sequence_SO=chromosome | SO=protein_coding	0.95767	0.942863	0.950266	0.0111056	1	29	29	29	22	23	22	23	22	23	35.5	35.5	35.5	121.8	1133	1133	2.31		45	7	2				1	0	132.26	0.81567	0.99721	19.276	48	0	Median	0.75047	0.95767	21.365	23	0	Median	0.91852
Tb927.7.4060	Tb927.7.4060	14	14	5	>Tb927.7.4060 | organism=Trypanosoma_brucei_TREU927 | product=calpain-like cysteine peptidase, putative,cysteine peptidase, Clan CA, family C2, putative | location=Tb927_07_v5.1:1075298-1075645(+) | length=115 | sequence_SO=chromosome | SO=protein_coding	1.0067	0.893895	0.950297	0.084604	1	14	14	5	13	9	13	9	5	3	99.1	99.1	44.3	12.873	115	115	8								29	0	80.688	0.82553	1.0373	13.362	26	0	Median	0.78979	1.0067	10.8	15	0	Median	0.93611
Tb927.2.4130	Tb927.2.4130	9	9	9	>Tb927.2.4130 | organism=Trypanosoma_brucei_TREU927 | product=enoyl-CoA hydratase/Enoyl-CoA isomerase/3-hydroxyacyl-CoA dehydrogenase, putative | location=Tb927_02_v5.1:721779-724251(-) | length=803 | sequence_SO=chromosome | SO=protein_coding	1.0586	0.842318	0.950459	0.162211	1	9	9	9	9	2	9	2	9	2	13.6	13.6	13.6	88.9	803	803	3.23			10	3					0	16.344	0.84247	1.0586	11.679	11	0	Median	0.84247	1.0586	11.679	11	0	Median	1.0571
Tb927.9.8720	Tb927.9.8720	12	12	12	>Tb927.9.8720 | organism=Trypanosoma_brucei_TREU927 | product=fructose-1,6-bisphosphatase (FBPase) | location=Tb927_09_v5.1:1405055-1406107(-) | length=350 | sequence_SO=chromosome | SO=protein_coding	0.89649	1.00482	0.950657	0.0812499	1	12	12	12	11	9	11	9	11	9	36.3	36.3	36.3	38.534	350	350	6.53						22	6	6	0	22.579	0.76449	0.94542	21.042	29	0	Median	0.71422	0.89649	19.395	18	0	Median	0.88303
Tb927.5.3390	Tb927.5.3390	8	8	8	>Tb927.5.3390 | organism=Trypanosoma_brucei_TREU927 | product=ADG1, pseudogene | location=Tb927_05_v5.1:1129185-1129541(-) | length=118 | sequence_SO=chromosome | SO=protein_coding	0.90268	0.998801	0.950741	0.0720911	1	8	8	8	8	7	8	7	8	7	48.3	48.3	48.3	13.175	118	118	7.85							3	17	0	24.123	0.79522	0.96283	17.848	15	0	Median	0.72129	0.90268	20.081	9	0	Median	0.85189
Tb927.2.3880	Tb927.2.3880	10	10	10	>Tb927.2.3880 | organism=Trypanosoma_brucei_TREU927 | product=heterogeneous nuclear ribonucleoprotein H/F, putative (HNRNPH) | location=Tb927_02_v5.1:684803-686266(-) | length=487 | sequence_SO=chromosome | SO=protein_coding	0.99157	0.910415	0.950993	0.0608661	1	10	10	10	10	6	10	6	10	6	30.6	30.6	30.6	55.134	487	487	5.81				5	5	9	4	3	0	30.946	0.83669	1.0293	22.912	23	0	Median	0.79882	0.99157	17.995	16	0	Median	0.94154
Tb927.11.330	Tb927.11.330	10	10	10	>Tb927.11.330 | organism=Trypanosoma_brucei_TREU927 | product=Nucleoporin (TbMlp-1) | location=Tb927_11_v5.1:73891-76845(-) | length=984 | sequence_SO=chromosome | SO=protein_coding	1.0372	0.864902	0.951051	0.129223	1	10	10	10	10	7	10	7	10	7	15.7	15.7	15.7	109.76	984	984	2		17							0	54.905	0.90493	1.0949	13.636	15	0	Median	0.84176	1.0372	9.4055	9	0	Median	1.0146
Tb927.7.6360	Tb927.7.6360	8	8	8	>Tb927.7.6360 | organism=Trypanosoma_brucei_TREU927 | product=histone H2A variant (h2aZ) | location=Tb927_07_v5.1:1727247-1727786(-) | length=179 | sequence_SO=chromosome | SO=protein_coding	1.052	0.850485	0.951242	0.151136	1	8	8	8	6	7	6	7	6	7	48	48	48	18.667	179	179	7.12	1						16	9	0	67.082	0.83553	1.0574	16.114	22	0	Median	0.82229	1.052	16.369	14	0	Median	1.0008
Tb927.8.2310	Tb927.8.2310	8	8	8	>Tb927.8.2310 | organism=Trypanosoma_brucei_TREU927 | product=(H )-ATPase G subunit, putative | location=Tb927_08_v5.1:699549-699878(+) | length=109 | sequence_SO=chromosome | SO=protein_coding	0.9789	0.923958	0.951429	0.0412063	1	8	8	8	8	4	8	4	8	4	71.6	71.6	71.6	12.749	109	109	8								17	0	82.463	0.77694	0.9858	9.0043	14	0	Median	0.76065	0.9789	6.9178	10	0	Median	0.92562
Tb927.1.90	Tb927.1.90	15	2	0	>Tb927.1.90 | organism=Trypanosoma_brucei_TREU927 | product=retrotransposon hot spot protein (RHS, pseudogene), putative | location=Tb927_01_v5.1:50428-52203(-) | length=592 | sequence_SO=chromosome | SO=protein_coding	0.98598	0.917011	0.951495	0.0517271	1	15	2	0	12	13	2	2	0	0	24.8	2.2	0	67.289	592	592	2.83		1	5						0	23.709	0.81106	1.0193	6.3536	6	0	Median	0.79738	0.98598	4.2467	4	0	Median	0.97811
Tb927.11.6170	Tb927.11.6170	26	26	26	>Tb927.11.6170 | organism=Trypanosoma_brucei_TREU927 | product=protein transport protein SEC31, putative,cytosolic coat protein, putative | location=Tb927_11_v5.1:1737795-1741490(-) | length=1231 | sequence_SO=chromosome | SO=protein_coding	1.0047	0.898392	0.951546	0.0797311	1	26	26	26	21	18	21	18	21	18	38.1	38.1	38.1	131.1	1231	1231	4.08		3	12	38			1	5	0	119.07	0.87338	1.0485	14.942	52	0	Median	0.79298	1.0047	13.001	32	0	Median	0.99446
Tb927.9.12630;Tb927.9.12590;Tb927.9.12570;Tb927.9.12550;Tb927.9.12610	Tb927.9.12630;Tb927.9.12590;Tb927.9.12570;Tb927.9.12550;Tb927.9.12610	44;44;44;42;41	44;44;44;42;41	44;44;44;42;41	>Tb927.9.12630 | organism=Trypanosoma_brucei_TREU927 | product=glycerol kinase, glycosomal (glk1) | location=Tb927_09_v5.1:1982416-1983954(+) | length=512 | sequence_SO=chromosome | SO=protein_coding;>Tb927.9.12590 | organism=Trypanosoma_brucei_TREU927 | p	0.93981	0.963391	0.951601	0.0176859	5	44	44	44	44	41	44	41	44	41	80.1	80.1	80.1	56.426	512	512;512;512;512;512	4.76	73	54	42	60	193	82	105	49	0	323.31	0.78288	0.97134	15.553	613	0	Median	0.74646	0.93981	11.65	331	0	Median	0.90541
Tb927.8.7040	Tb927.8.7040	6	6	6	>Tb927.8.7040 | organism=Trypanosoma_brucei_TREU927 | product=hypothetical protein, conserved | location=Tb927_08_v5.1:2022925-2023494(+) | length=189 | sequence_SO=chromosome | SO=protein_coding	0.98832	0.914913	0.951617	0.0550552	1	6	6	6	4	4	4	4	4	4	41.3	41.3	41.3	21.365	189	189	7.41							10	7	0	141.99	0.80268	1.0116	15.959	16	0	Median	0.79555	0.98832	11.603	9	0	Median	0.91027
Tb927.7.6290	Tb927.7.6290	10	10	10	>Tb927.7.6290 | organism=Trypanosoma_brucei_TREU927 | product=kinesin, putative (TbKIF9A) | location=Tb927_07_v5.1:1702287-1704962(-) | length=891 | sequence_SO=chromosome | SO=protein_coding	0.9285	0.974754	0.951627	0.0346904	1	10	10	10	6	10	6	10	6	10	16.6	16.6	16.6	96.951	891	891	3.12			15	2					0	18.713	0.8174	0.95337	15.8	11	0	Median	0.74254	0.9285	19.591	5	0	Median	0.87094
Tb927.8.3630;Tb11.v5.0766;Tb927.8.3620	Tb927.8.3630	3;1;1	3;1;1	2;0;0	>Tb927.8.3630 | organism=Trypanosoma_brucei_TREU927 | product=folate transporter, putative,expression site-associated gene 10 (ESAG10) protein, putative | location=Tb927_08_v5.1:1087606-1089504(-) | length=632 | sequence_SO=chromosome | SO=protein_coding	0.96363	0.939938	0.951784	0.017769	3	3	3	2	3	1	3	1	2	0	6.8	6.8	4.6	69.808	632	632;387;632	5.71				1	2	2	2		0	10.083	0.85027	0.97776	11.116	7	0	Median	0.7478	0.96363	11.226	4	0	Median	0.94565
Tb927.11.8210;Tb11.v5.0572;Tb11.v5.0573	Tb927.11.8210	31;11;5	31;11;5	31;11;5	>Tb927.11.8210 | organism=Trypanosoma_brucei_TREU927 | product=RAD50 DNA repair-like protein | location=Tb927_11_v5.1:2306956-2311005(+) | length=1349 | sequence_SO=chromosome | SO=protein_coding	0.94267	0.960984	0.951827	0.0137355	3	31	31	31	25	15	25	15	25	15	27	27	27	152.77	1349	1349;486;325	2		42							0	82.401	0.79934	0.97603	21.31	35	0	Median	0.75483	0.94267	20.853	23	0	Median	0.9187
Tb927.11.15870	Tb927.11.15870	6	6	6	>Tb927.11.15870 | organism=Trypanosoma_brucei_TREU927 | product=hypothetical protein, conserved | location=Tb927_11_v5.1:4203216-4204370(-) | length=384 | sequence_SO=chromosome | SO=protein_coding	1.048	0.855725	0.951862	0.144206	1	6	6	6	5	2	5	2	5	2	16.9	16.9	16.9	42.433	384	384	6.58					1	5	4	2	0	10.133	0.87064	1.079	15.886	9	0	Median	0.83475	1.048	14.013	8	0	Median	1.055
Tb927.5.1880	Tb927.5.1880	8	8	8	>Tb927.5.1880 | organism=Trypanosoma_brucei_TREU927 | product=inhibitor of serine peptidase (ISP), putative,ecotin family (I11), putative | location=Tb927_05_v5.1:640600-641064(+) | length=154 | sequence_SO=chromosome | SO=protein_coding	1.0136	0.890313	0.951957	0.092465	1	8	8	8	5	8	5	8	5	8	79.9	79.9	79.9	17.81	154	154	7.35							13	7	0	67.476	0.86578	1.0667	10.635	16	0	Median	0.79937	1.0136	9.4277	8	0	Median	0.96442
Tb927.8.2930;Tb927.8.2920;Tb927.8.2940	Tb927.8.2930;Tb927.8.2920;Tb927.8.2940	6;6;4	6;6;4	1;1;1	>Tb927.8.2930 | organism=Trypanosoma_brucei_TREU927 | product=mannosyl-oligosaccharide 1,2-alpha-mannosidase IB, putative | location=Tb927_08_v5.1:886730-888523(+) | length=597 | sequence_SO=chromosome | SO=protein_coding;>Tb927.8.2920 | organism=Trypanoso	0.89987	1.00431	0.952089	0.0783289	3	6	6	1	2	6	2	6	0	1	18.4	18.4	4	66.434	597	597;597;437	2.75		5		3					0	14.446	0.85283	0.97515	32.224	6	0	Median	0.71869	0.89987	10.37	2	1	Median	0.86301
Tb927.11.2670	Tb927.11.2670	10	10	10	>Tb927.11.2670 | organism=Trypanosoma_brucei_TREU927 | product=Nucleoporin (TbNup59) | location=Tb927_11_v5.1:783041-784678(-) | length=545 | sequence_SO=chromosome | SO=protein_coding	1.0055	0.898715	0.952107	0.0800889	1	10	10	10	10	4	10	4	10	4	22.9	22.9	22.9	58.822	545	545	6.08				7		3	12	2	0	46.376	0.81934	1.0248	22.085	22	0	Median	0.80868	1.0055	25.14	13	0	Median	1.0044
Tb927.9.6230	Tb927.9.6230	35	5	2	>Tb927.9.6230 | organism=Trypanosoma_brucei_TREU927 | product=unspecified product (AK) | location=Tb927_09_v5.1:1028991-1030577(+) | length=370 | sequence_SO=chromosome | SO=protein_coding	0.97777	0.926784	0.952277	0.0382395	1	35	5	2	33	28	4	4	1	2	66.2	7	4.3	41.597	370	370	5.9					11	4	1	4	0	6.9248	0.76403	0.97854	15.621	15	0	Median	0.75912	0.97777	16.535	10	0	Median	0.89933
Tb927.10.3660	Tb927.10.3660	27	27	27	>Tb927.10.3660 | organism=Trypanosoma_brucei_TREU927 | product=aspartate aminotransferase | location=Tb927_10_v5.1:952692-953903(-) | length=403 | sequence_SO=chromosome | SO=protein_coding	0.91712	0.987459	0.95229	0.0527545	1	27	27	27	25	20	25	20	25	20	71.2	71.2	71.2	44.787	403	403	5.86	2				23	35	14	4	0	161.72	0.77579	0.95607	33.304	69	0	Median	0.73048	0.91712	18.13	35	0	Median	0.90108
Tb927.10.14560;Tb11.v5.0477	Tb927.10.14560;Tb11.v5.0477	4;2	4;2	4;2	>Tb927.10.14560 | organism=Trypanosoma_brucei_TREU927 | product=hypothetical protein, conserved | location=Tb927_10_v5.1:3567127-3569136(-) | length=669 | sequence_SO=chromosome | SO=protein_coding;>Tb11.v5.0477 | organism=Trypanosoma_brucei_TREU927 | prod	0.94024	0.965065	0.952652	0.0186185	2	4	4	4	2	4	2	4	2	4	12	12	12	75.126	669	669;537	4				7					0	11.606	0.88615	0.99994	10.551	7	0	Median	0.75967	0.94024	3.9965	2	0	Median	0.94497
Tb927.8.6940;Tb927.4.5380	Tb927.8.6940;Tb927.4.5380	18;18	18;18	18;18	>Tb927.8.6940 | organism=Trypanosoma_brucei_TREU927 | product=hypothetical protein, conserved | location=Tb927_08_v5.1:2000856-2005238(+) | length=1460 | sequence_SO=chromosome | SO=protein_coding;>Tb927.4.5380 | organism=Trypanosoma_brucei_TREU927 | produ	0.97694	0.928678	0.952809	0.0361968	2	18	18	18	15	14	15	14	15	14	17.1	17.1	17.1	164.96	1460	1460;1460	1.98	7	30	2	2					0	74.834	0.78589	0.98618	17.09	33	0	Median	0.7704	0.97694	12.608	20	0	Median	0.95683
Tb927.9.13610	Tb927.9.13610	28	28	28	>Tb927.9.13610 | organism=Trypanosoma_brucei_TREU927 | product=helicase, putative | location=Tb927_09_v5.1:2158096-2162088(-) | length=1330 | sequence_SO=chromosome | SO=protein_coding	0.9435	0.962279	0.952889	0.014084	1	28	28	28	22	16	22	16	22	16	30.3	30.3	30.3	149.24	1330	1330	2.34		35	10	1		1			0	87.696	0.77143	0.96435	13.158	39	0	Median	0.74499	0.9435	11.21	25	0	Median	0.90472
Tb927.11.3280;Tb927.9.3650	Tb927.11.3280	13;1	13;1	13;1	>Tb927.11.3280 | organism=Trypanosoma_brucei_TREU927 | product=kinesin, putative,MCAK-like kinesin, putative (Kif13-5) | location=Tb927_11_v5.1:951904-954063(+) | length=719 | sequence_SO=chromosome | SO=protein_coding	0.9469	0.960246	0.953573	0.0100094	2	13	13	13	11	6	11	6	11	6	29.2	29.2	29.2	80.07	719	719;691	3.7			12	6		1		1	0	33.22	0.82777	0.98906	23.411	15	0	Median	0.75693	0.9469	21.762	11	0	Median	0.95418
Tb927.11.11280;Tb11.v5.1041	Tb927.11.11280;Tb11.v5.1041	5;3	5;3	5;3	>Tb927.11.11280 | organism=Trypanosoma_brucei_TREU927 | product=hypothetical protein, conserved | location=Tb927_11_v5.1:3016985-3020107(+) | length=1040 | sequence_SO=chromosome | SO=protein_coding;>Tb11.v5.1041 | organism=Trypanosoma_brucei_TREU927 | pro	0.81599	1.0912	0.953596	0.20641	2	5	5	5	4	2	4	2	4	2	7.3	7.3	7.3	120.86	1040	1040;484	2		6							0	10.785	0.7496	0.88098	15.846	6	0	Median	0.66066	0.81599	17.388	4	0	Median	0.81689
Tb927.10.12890	Tb927.10.12890	41	41	41	>Tb927.10.12890 | organism=Trypanosoma_brucei_TREU927 | product=bifunctional aminoacyl-tRNA synthetase, putative | location=Tb927_10_v5.1:3132295-3134721(-) | length=808 | sequence_SO=chromosome | SO=protein_coding	0.96395	0.943396	0.953673	0.0154153	1	41	41	41	34	38	34	38	34	38	55.2	55.2	55.2	90.96	808	808	3.67		1	48	73			3		0	183.93	0.82205	1.0075	13.071	117	0	Median	0.75211	0.96395	14.055	66	0	Median	0.89816
Tb927.5.3830	Tb927.5.3830	5	5	5	>Tb927.5.3830 | organism=Trypanosoma_brucei_TREU927 | product=dihydroorotate oxidase | location=Tb927_05_v5.1:1250559-1251500(+) | length=313 | sequence_SO=chromosome | SO=protein_coding	0.87982	1.02806	0.953938	0.111177	1	5	5	5	5	5	5	5	5	5	25.2	25.2	25.2	34.112	313	313	6						10			0	49.229	0.83046	0.96687	7.442	9	0	Median	0.68177	0.87982	8.8533	4	0	Median	0.84156
Tb927.11.6420	Tb927.11.6420	42	42	42	>Tb927.11.6420 | organism=Trypanosoma_brucei_TREU927 | product=hypothetical protein, conserved | location=Tb927_11_v5.1:1807696-1811655(-) | length=1319 | sequence_SO=chromosome | SO=protein_coding	0.99329	0.914746	0.954018	0.0589082	1	42	42	42	38	28	38	28	38	28	42.2	42.2	42.2	144.87	1319	1319	1.99	1	71							0	205.95	0.84374	1.0195	14.363	59	0	Median	0.78563	0.99329	14.229	35	0	Median	0.92574
Tb927.11.10560	Tb927.11.10560	12	12	12	>Tb927.11.10560 | organism=Trypanosoma_brucei_TREU927 | product=eukaryotic translation initation factor 4 gamma, putative | location=Tb927_11_v5.1:2812025-2814118(+) | length=697 | sequence_SO=chromosome | SO=protein_coding	0.89732	1.01132	0.954318	0.0854975	1	12	12	12	6	10	6	10	6	10	20.1	20.1	20.1	79.7	697	697	4.44			5	6	2	4	1		0	16.69	0.76417	0.90227	22.3	14	0	Median	0.71746	0.89732	8.8102	5	0	Median	0.89184
Tb927.3.4970	Tb927.3.4970	8	8	8	>Tb927.3.4970 | organism=Trypanosoma_brucei_TREU927 | product=hypothetical protein, conserved | location=Tb927_03_v5.1:1394942-1398573(+) | length=1063 | sequence_SO=chromosome | SO=protein_coding	1.0135	0.895496	0.954498	0.0885033	1	8	8	8	6	4	6	4	6	4	12.8	12.8	12.8	115.81	1063	1063	2.23		10	3						0	8.9643	0.85974	1.0659	24.738	13	0	Median	0.79219	1.0135	31.565	8	0	Median	0.98569
Tb927.5.4380;Tb05.5K5.30	Tb927.5.4380;Tb05.5K5.30	19;19	19;19	19;19	>Tb927.5.4380 | organism=Trypanosoma_brucei_TREU927 | product=kinetoplastid-specific phospho-protein phosphatase, putative | location=Tb927_05_v5.1:1357435-1359345(-) | length=636 | sequence_SO=chromosome | SO=protein_coding;>Tb05.5K5.30 | organism=Trypano	0.97476	0.934754	0.954757	0.0300044	2	19	19	19	14	15	14	15	14	15	43.4	43.4	43.4	71.37	636	636;636	4.98			1	27	2	3	8	3	0	78.149	0.83529	1.0137	14.9	41	0	Median	0.76277	0.97476	13.595	23	0	Median	0.95035
Tb927.9.5210	Tb927.9.5210	29	29	29	>Tb927.9.5210 | organism=Trypanosoma_brucei_TREU927 | product=glutaminyl-tRNA synthetase, putative | location=Tb927_09_v5.1:918642-920375(+) | length=577 | sequence_SO=chromosome | SO=protein_coding	1.0018	0.907935	0.954868	0.0703985	1	29	29	29	26	25	26	25	26	25	49	49	49	67.278	577	577	4				61					0	56.553	0.87383	1.041	15.004	53	0	Median	0.79105	1.0018	14.22	27	0	Median	0.94146
Tb11.v5.1039;Tb927.10.2990	Tb11.v5.1039;Tb927.10.2990	11;11	11;11	11;11	>Tb11.v5.1039 | organism=Trypanosoma_brucei_TREU927 | product=hypothetical protein, conserved | location=Tb927_11_bin_v5.1:5512365-5515100(-) | length=911 | sequence_SO=random_sequence | SO=protein_coding;>Tb927.10.2990 | organism=Trypanosoma_brucei_TREU92	0.96311	0.947239	0.955174	0.0119034	2	11	11	11	11	4	11	4	11	4	16.5	16.5	16.5	100.4	911	911;1004	3			15						0	36.523	0.7863	0.97464	7.8567	12	0	Median	0.74789	0.96311	7.4822	8	0	Median	0.97423
Tb927.11.2690	Tb927.11.2690	11	11	11	>Tb927.11.2690 | organism=Trypanosoma_brucei_TREU927 | product=succinyl-coA:3-ketoacid-coenzyme A transferase, mitochondrial precursor, putative | location=Tb927_11_v5.1:789901-791382(-) | length=493 | sequence_SO=chromosome | SO=protein_coding	1.0355	0.874891	0.955195	0.120457	1	11	11	11	10	5	10	5	10	5	32.3	32.3	32.3	53.096	493	493	5.16					18			1	0	40.857	0.86375	1.0697	15.774	15	0	Median	0.82149	1.0355	11.926	11	0	Median	1.0116
Tb927.8.3100	Tb927.8.3100	16	16	16	>Tb927.8.3100 | organism=Trypanosoma_brucei_TREU927 | product=coronin, putative (CRN12) | location=Tb927_08_v5.1:929015-930586(+) | length=523 | sequence_SO=chromosome | SO=protein_coding	0.96759	0.94304	0.955315	0.0184122	1	16	16	16	13	13	13	13	13	13	45.7	45.7	45.7	57.312	523	523	4.76			1	24	18	5		3	0	70.449	0.86207	1.0144	16.728	39	0	Median	0.77965	0.96759	20.13	21	0	Median	0.937
Tb927.10.14380	Tb927.10.14380	7	7	7	>Tb927.10.14380 | organism=Trypanosoma_brucei_TREU927 | product=hypothetical protein, conserved | location=Tb927_10_v5.1:3495871-3498456(-) | length=861 | sequence_SO=chromosome | SO=protein_coding	0.98835	0.922424	0.955387	0.0494444	1	7	7	7	4	4	4	4	4	4	12.9	12.9	12.9	92.77	861	861	3			10						0	27.382	0.89469	1.0841	18.555	7	0	Median	0.80376	0.98835	19.214	4	0	Median	0.98438
Tb927.3.1240	Tb927.3.1240	8	8	8	>Tb927.3.1240 | organism=Trypanosoma_brucei_TREU927 | product=protein phosphatase 2A, putative | location=Tb927_03_v5.1:309482-310453(+) | length=323 | sequence_SO=chromosome | SO=protein_coding	1.0309	0.880127	0.955513	0.11308	1	8	8	8	5	5	5	5	5	5	35.9	35.9	35.9	36.243	323	323	6						10			0	25.792	0.82514	1.0309	37.552	7	0	Median	0.82514	1.0309	21.331	5	0	Median	1.0259
Tb927.2.1890	Tb927.2.1890	3	3	3	>Tb927.2.1890 | organism=Trypanosoma_brucei_TREU927 | product=E2-like ubiquitin-conjugation enzyme (ATG3) | location=Tb927_02_v5.1:350887-351765(+) | length=292 | sequence_SO=chromosome | SO=protein_coding	0.83198	1.07994	0.955958	0.185968	1	3	3	3	3	2	3	2	3	2	22.3	22.3	22.3	33.628	292	292	7.4							3	2	0	8.1758	0.67242	0.83198	23.965	5	0	Median	0.67242	0.83198	6.1613	3	0	Median	0.81875
Tb927.6.1570	Tb927.6.1570	14	14	14	>Tb927.6.1570 | organism=Trypanosoma_brucei_TREU927 | product=2-hydroxy-3-oxopropionate reductase, putative | location=Tb927_06_v5.1:543198-544100(-) | length=300 | sequence_SO=chromosome | SO=protein_coding	0.97336	0.938615	0.955987	0.026059	1	14	14	14	13	12	13	12	13	12	67	67	67	31.753	300	300	6.27						38	7	3	0	101.8	0.80171	0.99249	13.977	47	0	Median	0.75114	0.97336	10.807	28	0	Median	0.95238
Tb927.5.2140	Tb927.5.2140	21	21	21	>Tb927.5.2140 | organism=Trypanosoma_brucei_TREU927 | product=regulator of nonsense transcripts UPF1 | location=Tb927_05_v5.1:732744-735318(-) | length=842 | sequence_SO=chromosome | SO=protein_coding	0.94346	0.968711	0.956085	0.018938	1	21	21	21	12	20	12	20	12	20	41.8	41.8	41.8	93.324	842	842	3			33						0	105.75	0.83011	1.0063	17.125	32	0	Median	0.74481	0.94346	17.185	13	0	Median	0.89731
Tb927.10.1550	Tb927.10.1550	22	22	22	>Tb927.10.1550 | organism=Trypanosoma_brucei_TREU927 | product=proteasome regulatory non-ATP-ase subunit 5,19S proteasome regulatory subunit (RPN5) | location=Tb927_10_v5.1:425467-426915(-) | length=482 | sequence_SO=chromosome | SO=protein_coding	0.94785	0.964972	0.956411	0.0128412	1	22	22	22	22	14	22	14	22	14	58.1	58.1	58.1	54.896	482	482	5					40				0	96.875	0.79848	0.99034	27.771	33	0	Median	0.74897	0.94785	26.042	20	0	Median	0.93368
Tb927.10.1430	Tb927.10.1430	17	17	17	>Tb927.10.1430 | organism=Trypanosoma_brucei_TREU927 | product=hypothetical protein, conserved | location=Tb927_10_v5.1:374254-374991(-) | length=245 | sequence_SO=chromosome | SO=protein_coding	0.95646	0.956755	0.956607	0.000221016	1	17	17	17	17	6	17	6	17	6	76.7	76.7	76.7	27.339	245	245	6.76						7	22		0	90.074	0.76562	0.95792	11.582	27	0	Median	0.75572	0.95646	10.336	21	0	Median	0.92228
Tb927.10.8080	Tb927.10.8080	13	13	13	>Tb927.10.8080 | organism=Trypanosoma_brucei_TREU927 | product=hypothetical protein, conserved | location=Tb927_10_v5.1:2012909-2015131(-) | length=740 | sequence_SO=chromosome | SO=protein_coding	0.98164	0.931706	0.956673	0.0374505	1	13	13	13	9	9	9	9	9	9	22.7	22.7	22.7	82.38	740	740	3.81		1	2	18					0	60.96	0.82957	1.0122	17.621	20	0	Median	0.79864	0.98164	14.147	10	0	Median	0.96339
Tb927.6.3610	Tb927.6.3610	5	5	5	>Tb927.6.3610 | organism=Trypanosoma_brucei_TREU927 | product=hypothetical protein, conserved | location=Tb927_06_v5.1:1076832-1077869(-) | length=345 | sequence_SO=chromosome | SO=protein_coding	0.91455	0.999001	0.956775	0.0633382	1	5	5	5	3	4	3	4	3	4	27.2	27.2	27.2	38.967	345	345	6						7			0	19.826	0.81963	0.95679	9.4673	6	0	Median	0.73183	0.91455	9.5018	3	0	Median	0.90715
Tb927.1.3260	Tb927.1.3260	32	32	32	>Tb927.1.3260 | organism=Trypanosoma_brucei_TREU927 | product=hypothetical protein, conserved | location=Tb927_01_v5.1:703126-708786(+) | length=1886 | sequence_SO=chromosome | SO=protein_coding	0.98875	0.925241	0.956995	0.0476321	1	32	32	32	15	29	15	29	15	29	27.2	27.2	27.2	203.06	1886	1886	2.08	9	37	1	6					0	144.48	0.85265	1.0289	20.274	47	0	Median	0.79055	0.98875	27.705	17	0	Median	0.92819
Tb927.6.1950	Tb927.6.1950	12	12	12	>Tb927.6.1950 | organism=Trypanosoma_brucei_TREU927 | product=hypothetical protein, conserved | location=Tb927_06_v5.1:640951-643539(-) | length=862 | sequence_SO=chromosome | SO=protein_coding	0.87753	1.03654	0.957034	0.119256	1	12	12	12	6	9	6	9	6	9	18.9	18.9	18.9	95.774	862	862	3.12			14	2					0	41.51	0.8229	0.9146	9.9211	14	0	Median	0.69324	0.87753	8.8362	5	0	Median	0.8887
Tb927.10.14180	Tb927.10.14180	11	11	11	>Tb927.10.14180 | organism=Trypanosoma_brucei_TREU927 | product=protein transport protein SEC13, putative,cytosolic coat protein, putative | location=Tb927_10_v5.1:3444000-3445124(-) | length=374 | sequence_SO=chromosome | SO=protein_coding	1.016	0.898069	0.957035	0.0884481	1	11	11	11	10	7	10	7	10	7	44.9	44.9	44.9	41.675	374	374	5.79		6	1		1	14	14	3	0	46.877	0.8442	1.0262	16.296	36	0	Median	0.8182	1.016	14.881	25	0	Median	1.0053
Tb927.6.2320;Tb927.6.2260	Tb927.6.2320;Tb927.6.2260	4;4	4;4	4;4	>Tb927.6.2320 | organism=Trypanosoma_brucei_TREU927 | product=hypothetical protein, conserved | location=Tb927_06_v5.1:720910-721476(+) | length=188 | sequence_SO=chromosome | SO=protein_coding;>Tb927.6.2260 | organism=Trypanosoma_brucei_TREU927 | product=	0.96185	0.952381	0.957115	0.00710179	2	4	4	4	3	2	3	2	3	2	28.7	28.7	28.7	20.146	188	188;188	8								5	0	34.004	0.83832	0.96185	12.258	5	0	Median	0.76352	0.96185	12.638	3	0	Median	0.9389
Tb927.10.12010	Tb927.10.12010	4	4	4	>Tb927.10.12010 | organism=Trypanosoma_brucei_TREU927 | product=hypothetical protein, conserved | location=Tb927_10_v5.1:2921123-2921518(+) | length=131 | sequence_SO=chromosome | SO=protein_coding	0.90711	1.00716	0.957135	0.0750382	1	4	4	4	3	3	3	3	3	3	35.1	35.1	35.1	14.706	131	131	8								10	0	38.999	0.72247	0.91685	15.964	9	0	Median	0.71345	0.90711	16.763	5	0	Median	0.83866
Tb927.4.3400	Tb927.4.3400	8	8	8	>Tb927.4.3400 | organism=Trypanosoma_brucei_TREU927 | product=hypothetical protein, conserved | location=Tb927_04_v5.1:886670-888487(-) | length=605 | sequence_SO=chromosome | SO=protein_coding	0.94813	0.966184	0.957157	0.0135402	1	8	8	8	6	3	6	3	6	3	20.3	20.3	20.3	66.689	605	605	4				9					0	20.701	0.82097	0.99011	15.872	8	0	Median	0.74763	0.94813	18.104	5	0	Median	0.92206
Tb927.1.4490	Tb927.1.4490	11	11	11	>Tb927.1.4490 | organism=Trypanosoma_brucei_TREU927 | product=acetyltransferase, putative | location=Tb927_01_v5.1:928843-929376(+) | length=172 | sequence_SO=chromosome | SO=protein_coding	0.94302	0.971345	0.957183	0.021244	1	11	11	11	10	4	10	4	10	4	50.6	50.6	50.6	19.682	172	172	7.06							16	1	0	33.568	0.73103	0.94537	20.719	15	0	Median	0.7217	0.94302	22.671	12	0	Median	0.90559
Tb927.8.7020	Tb927.8.7020	39	39	39	>Tb927.8.7020 | organism=Trypanosoma_brucei_TREU927 | product=peptidase, putative,metallo-peptidase, Clan ME, Family M16 | location=Tb927_08_v5.1:2018034-2021228(+) | length=1064 | sequence_SO=chromosome | SO=protein_coding	0.96124	0.954016	0.957628	0.00541769	1	39	39	39	34	30	34	30	34	30	47	47	47	118.86	1064	1064	2.12		70	3	3					0	212.13	0.82255	0.98957	11.957	70	0	Median	0.76663	0.96124	11.496	40	0	Median	0.93653
Tb927.11.10540	Tb927.11.10540	41	41	41	>Tb927.11.10540 | organism=Trypanosoma_brucei_TREU927 | product=hypothetical protein, conserved | location=Tb927_11_v5.1:2804994-2807561(+) | length=855 | sequence_SO=chromosome | SO=protein_coding	0.98425	0.931012	0.957631	0.0399285	1	41	41	41	32	30	32	30	32	30	53.6	53.6	53.6	99.443	855	855	3.41		1	67		3	8	1		0	188.29	0.82665	1.0192	14.32	63	0	Median	0.76489	0.98425	14.447	37	0	Median	0.92158
Tb927.8.3020	Tb927.8.3020	3	3	3	>Tb927.8.3020 | organism=Trypanosoma_brucei_TREU927 | product=hypothetical protein, conserved | location=Tb927_08_v5.1:907053-909089(+) | length=678 | sequence_SO=chromosome | SO=protein_coding	1.0329	0.88269	0.957795	0.112657	1	3	3	3	3	1	3	1	3	1	8.4	8.4	8.4	74.302	678	678	4				6					0	10.744	0.96537	1.1329	9.1515	4	0	Median	0.82135	1.0329	21.628	3	1	Median	1.0271
Tb927.11.2270	Tb927.11.2270	18	18	18	>Tb927.11.2270 | organism=Trypanosoma_brucei_TREU927 | product=dynein intermediate chain IC140 (IDA7), putative | location=Tb927_11_v5.1:644653-647082(+) | length=809 | sequence_SO=chromosome | SO=protein_coding	0.94335	0.972857	0.958104	0.0221305	1	18	18	18	14	12	14	12	14	12	30.2	30.2	30.2	90.406	809	809	3.13			26	4					0	70.104	0.85668	0.99656	13.241	23	0	Median	0.74925	0.94335	11.513	11	0	Median	0.92443
Tb927.4.3160	Tb927.4.3160	24	24	24	>Tb927.4.3160 | organism=Trypanosoma_brucei_TREU927 | product=dihydroxyacetone phosphate acyltransferase, putative (DAT) | location=Tb927_04_v5.1:829475-833480(+) | length=1242 | sequence_SO=chromosome | SO=protein_coding	1.0084	0.908265	0.958333	0.0751011	1	24	24	24	24	6	24	6	24	6	26.6	26.6	26.6	137.14	1242	1242	2		33							0	66.549	0.81594	1.0182	23.478	28	0	Median	0.81306	1.0084	17.929	23	0	Median	0.92731
Tb927.7.3900	Tb927.7.3900	3	3	3	>Tb927.7.3900 | organism=Trypanosoma_brucei_TREU927 | product=vacuolar transporter chaperone, putative | location=Tb927_07_v5.1:1020477-1021901(+) | length=180 | sequence_SO=chromosome | SO=protein_coding	1.02	0.896781	0.95839	0.0924146	1	3	3	3	2	2	2	2	2	2	17.2	17.2	17.2	19.768	180	180	7.5							2	2	0	4.8901	0.88422	1.0457	12.911	4	0	Median	0.80997	1.02	11.435	2	0	Median	0.96145
Tb927.5.3820	Tb927.5.3820	14	14	14	>Tb927.5.3820 | organism=Trypanosoma_brucei_TREU927 | product=aspartate carbamoyltransferase, putative | location=Tb927_05_v5.1:1248766-1249749(+) | length=327 | sequence_SO=chromosome | SO=protein_coding	0.92862	0.988338	0.958479	0.0447882	1	14	14	14	10	9	10	9	10	9	53.5	53.5	53.5	35.91	327	327	6						21			0	52.245	0.7777	0.94258	19.326	17	0	Median	0.74365	0.92862	11.37	10	0	Median	0.86348
Tb927.8.6580	Tb927.8.6580	22	22	22	>Tb927.8.6580 | organism=Trypanosoma_brucei_TREU927 | product=succinate dehydrogenase flavoprotein, putative | location=Tb927_08_v5.1:1901186-1903061(-) | length=609 | sequence_SO=chromosome | SO=protein_coding	1.0333	0.883939	0.958619	0.112021	1	22	22	22	20	14	20	14	20	14	52.4	52.4	52.4	66.88	609	609	4.25	1			41		3	3		0	87.817	0.85614	1.0597	18.65	34	0	Median	0.81768	1.0333	19.477	23	0	Median	0.93887
Tb927.11.5400	Tb927.11.5400	9	9	9	>Tb927.11.5400 | organism=Trypanosoma_brucei_TREU927 | product=signal recognition particle 54 kDa (SRP54) | location=Tb927_11_v5.1:1535638-1537101(+) | length=487 | sequence_SO=chromosome | SO=protein_coding	1.0353	0.88199	0.958645	0.114983	1	9	9	9	7	5	7	5	7	5	23.2	23.2	23.2	53.374	487	487	5.15					12		1		0	33.033	0.83468	1.0459	21.364	8	0	Median	0.82652	1.0353	11.029	5	0	Median	1.0409
Tb927.8.7100	Tb927.8.7100	85	85	84	>Tb927.8.7100 | organism=Trypanosoma_brucei_TREU927 | product=acetyl-CoA carboxylase | location=Tb927_08_v5.1:2041100-2047645(+) | length=2181 | sequence_SO=chromosome | SO=protein_coding	0.93996	0.977422	0.958691	0.0280962	1	85	85	84	74	66	74	66	73	66	53.3	53.3	53	242.91	2181	2181	2.2	75	122	80	24				1	0	323.31	0.82638	0.98823	17.066	268	0	Median	0.75344	0.93996	16.932	129	0	Median	0.89902
Tb927.7.4070	Tb927.7.4070	13	4	4	>Tb927.7.4070 | organism=Trypanosoma_brucei_TREU927 | product=calpain-like cysteine peptidase, putative,cysteine peptidase, Clan CA, family C2, putative | location=Tb927_07_v5.1:1076026-1076388(+) | length=120 | sequence_SO=chromosome | SO=protein_coding	0.95752	0.959969	0.958745	0.00183696	1	13	4	4	11	10	3	4	3	4	92.5	37.5	37.5	13.518	120	120	8								10	0	36.435	0.78591	0.97186	10.593	8	0	Median	0.75383	0.95752	9.6167	4	0	Median	0.86051
Tb927.7.6460	Tb927.7.6460	13	13	13	>Tb927.7.6460 | organism=Trypanosoma_brucei_TREU927 | product=FG-GAP repeat protein, putative,intergrin alpha chain protein, putative | location=Tb927_07_v5.1:1753202-1755739(+) | length=845 | sequence_SO=chromosome | SO=protein_coding	0.99764	0.920302	0.958971	0.0580036	1	13	13	13	10	11	10	11	10	11	24.3	24.3	24.3	92.145	845	845	2.18		24	3	1					0	47.23	0.80655	1.0085	18.521	23	0	Median	0.78364	0.99764	16.012	12	0	Median	0.9291
Tb927.6.850;Tb11.v5.0689	Tb927.6.850;Tb11.v5.0689	5;3	5;3	5;3	>Tb927.6.850 | organism=Trypanosoma_brucei_TREU927 | product=ccr4-not transcription complex subunit 2 | location=Tb927_06_v5.1:359179-360674(-) | length=330 | sequence_SO=chromosome | SO=protein_coding;>Tb11.v5.0689 | organism=Trypanosoma_brucei_TREU927 |	0.99055	0.927472	0.959011	0.0473087	2	5	5	5	2	4	2	4	2	4	22.7	22.7	22.7	37.396	330	330;413	6.57						3	4		0	16.751	0.86693	1.0424	16.544	5	0	Median	0.77191	0.99055	7.2189	2	0	Median	0.92291
Tb927.5.2980	Tb927.5.2980	4	4	4	>Tb927.5.2980 | organism=Trypanosoma_brucei_TREU927 | product=hypothetical protein, conserved | location=Tb927_05_v5.1:994105-997350(+) | length=1081 | sequence_SO=chromosome | SO=protein_coding	0.90068	1.01777	0.959225	0.0878177	1	4	4	4	3	1	3	1	3	1	5.6	5.6	5.6	121.3	1081	1081	3.2		3			2				0	3.2956	0.84024	0.98254	10.602	4	0	Median	0.7423	0.90068	11.475	3	1	Median	0.87383
Tb927.6.2740	Tb927.6.2740	12	12	12	>Tb927.6.2740 | organism=Trypanosoma_brucei_TREU927 | product=pyridoxal kinase (pdxK) | location=Tb927_06_v5.1:823608-824510(+) | length=300 | sequence_SO=chromosome | SO=protein_coding	0.91629	1.00247	0.959378	0.064632	1	12	12	12	10	8	10	8	10	8	54.7	54.7	54.7	33.332	300	300	6						23			0	92.684	0.79954	0.96307	10.357	23	0	Median	0.71358	0.91629	9.7976	14	0	Median	0.89551
Tb927.7.3700	Tb927.7.3700	4	4	4	>Tb927.7.3700 | organism=Trypanosoma_brucei_TREU927 | product=hypothetical protein, conserved | location=Tb927_07_v5.1:964950-965867(-) | length=305 | sequence_SO=chromosome | SO=protein_coding	0.79278	1.12616	0.959472	0.250038	1	4	4	4	3	2	3	2	3	2	20.3	20.3	20.3	33.765	305	305	6						5			0	11.451	0.71045	0.82722	9.7456	5	0	Median	0.61747	0.79278	9.8235	3	0	Median	0.78655
Tb927.11.1660	Tb927.11.1660	4	4	4	>Tb927.11.1660 | organism=Trypanosoma_brucei_TREU927 | product=vesicular transport protein (CDC48 homologue), putative | location=Tb927_11_v5.1:509071-511059(-) | length=662 | sequence_SO=chromosome | SO=protein_coding	0.97429	0.944733	0.959512	0.0221677	1	4	4	4	2	3	2	3	2	3	12.2	12.2	12.2	73.318	662	662	4				5					0	6.9612	0.81757	1.0334	15.339	3	0	Median	0.77656	0.97429	8.327	2	1	Median	0.88162
Tb927.3.5490	Tb927.3.5490	21	21	21	>Tb927.3.5490 | organism=Trypanosoma_brucei_TREU927 | product=flagellar transport protein, putative (PIFTB2) | location=Tb927_03_v5.1:1535280-1537319(+) | length=675 | sequence_SO=chromosome | SO=protein_coding	0.96131	0.957854	0.959582	0.0025917	1	21	21	21	18	18	18	18	18	18	46.7	46.7	46.7	77.659	675	675	4.57				40	4	1	1	5	0	71.893	0.85604	1.0043	13.93	48	0	Median	0.76057	0.96131	16.144	26	0	Median	0.89725
Tb927.11.10900	Tb927.11.10900	9	9	9	>Tb927.11.10900 | organism=Trypanosoma_brucei_TREU927 | product=MENG | location=Tb927_11_v5.1:2908386-2910932(+) | length=848 | sequence_SO=chromosome | SO=protein_coding	0.95655	0.96302	0.959785	0.00485252	1	9	9	9	5	5	5	5	5	5	14.7	14.7	14.7	99.792	848	848	3			10						0	21.472	0.78719	0.97015	11.2	9	0	Median	0.74872	0.95655	11.019	5	0	Median	0.94267
Tb927.1.3110	Tb927.1.3110	7	7	7	>Tb927.1.3110 | organism=Trypanosoma_brucei_TREU927 | product=soluble N-ethylmaleimide sensitive factor (NSF) attachment protein, putative | location=Tb927_01_v5.1:677755-678611(+) | length=281 | sequence_SO=chromosome | SO=protein_coding	1.0001	0.920132	0.960116	0.0599756	1	7	7	7	7	5	7	5	7	5	30.6	30.6	30.6	32.136	281	281	6.07						13	1		0	29.611	0.80714	1.042	10.213	12	0	Median	0.78672	1.0001	9.1389	8	0	Median	0.98863
Tb927.10.13280	Tb927.10.13280	57	57	57	>Tb927.10.13280 | organism=Trypanosoma_brucei_TREU927 | product=hypothetical protein, conserved | location=Tb927_10_v5.1:3238318-3246138(-) | length=2606 | sequence_SO=chromosome | SO=protein_coding	0.91247	1.00842	0.960445	0.0719627	1	57	57	57	26	53	26	53	26	53	29.4	29.4	29.4	286.2	2606	2606	1.57	60	55	4	2					0	323.31	0.82079	0.95903	20.961	105	0	Median	0.71297	0.91247	11.754	31	0	Median	0.86442
Tb927.11.10040	Tb927.11.10040	2	2	2	>Tb927.11.10040 | organism=Trypanosoma_brucei_TREU927 | product=hypothetical protein, conserved | location=Tb927_11_v5.1:2698929-2699297(+) | length=122 | sequence_SO=chromosome | SO=protein_coding	0.94064	0.980296	0.960468	0.029742	1	2	2	2	2	2	2	2	2	2	23.8	23.8	23.8	13.539	122	122	8								4	0	6.2999	0.77358	0.95066	6.9273	4	0	Median	0.74109	0.94064	0.36792	2	0	Median	0.89023
Tb927.11.4900	Tb927.11.4900	14	14	14	>Tb927.11.4900 | organism=Trypanosoma_brucei_TREU927 | product=guanine nucleotide-binding beta subunit-like protein,G-protein (beta)-like protein,beta transducin-like protein | location=Tb927_11_v5.1:1400327-1402009(+) | length=560 | sequence_SO=chromosome	0.94359	0.977422	0.960506	0.0253737	1	14	14	14	9	10	9	10	9	10	25.7	25.7	25.7	61.857	560	560	4.64				10	14	1			0	75.211	0.87234	0.99992	17.047	21	0	Median	0.74637	0.94359	18.458	10	0	Median	0.91368
Tb927.9.5520	Tb927.9.5520	36	36	36	>Tb927.9.5520 | organism=Trypanosoma_brucei_TREU927 | product=ubiquitin carboxyl-terminal hydrolase, putative,cysteine peptidase, Clan CA, family C19, putative | location=Tb927_09_v5.1:954383-958411(+) | length=1342 | sequence_SO=chromosome | SO=protein_co	0.98976	0.931446	0.960603	0.0437358	1	36	36	36	36	13	36	13	36	13	37.2	37.2	37.2	151.16	1342	1342	2.01	1	64	2						0	105.09	0.80708	0.99313	14.581	53	0	Median	0.7888	0.98976	13.815	40	0	Median	0.93108
Tb927.8.6980;Tb927.4.5340	Tb927.8.6980;Tb927.4.5340	5;4	5;4	5;4	>Tb927.8.6980 | organism=Trypanosoma_brucei_TREU927 | product=hypothetical protein, conserved | location=Tb927_08_v5.1:2010423-2012924(+) | length=833 | sequence_SO=chromosome | SO=protein_coding;>Tb927.4.5340 | organism=Trypanosoma_brucei_TREU927 | produc	0.79358	1.12787	0.960723	0.250715	2	5	5	5	2	4	2	4	2	4	7.1	7.1	7.1	95.057	833	833;835	3.86			5	1				1	0	3.9139	0.76217	0.88663	21.915	6	0	Median	0.63111	0.79358	28.626	2	0	Median	0.77954
Tb927.10.5840	Tb927.10.5840	11	7	7	>Tb927.10.5840 | organism=Trypanosoma_brucei_TREU927 | product=translation elongation factor 1-beta, putative | location=Tb927_10_v5.1:1448918-1449523(-) | length=201 | sequence_SO=chromosome | SO=protein_coding	0.98258	0.938879	0.960729	0.0327758	1	11	7	7	9	9	6	6	6	6	58.2	48.8	48.8	21.959	201	201	6.64	1			2		12	22	8	0	138.7	0.83755	1.0247	15.757	42	0	Median	0.77375	0.98258	18.908	18	0	Median	0.91857
Tb927.9.9660	Tb927.9.9660	10	10	10	>Tb927.9.9660 | organism=Trypanosoma_brucei_TREU927 | product=hypothetical protein, conserved | location=Tb927_09_v5.1:1537822-1538877(-) | length=351 | sequence_SO=chromosome | SO=protein_coding	0.95162	0.969932	0.960776	0.0137341	1	10	10	10	6	5	6	5	6	5	40.7	40.7	40.7	38.295	351	351	6						11			0	58.637	0.78799	0.97934	12.074	10	0	Median	0.7343	0.95162	11.386	6	0	Median	0.93731
Tb927.9.9290	Tb927.9.9290	11	11	11	>Tb927.9.9290 | organism=Trypanosoma_brucei_TREU927 | product=Polyadenylate-binding protein 1 (Poly(A)-binding protein 1) (PABP 1) (PABP1) | location=Tb927_09_v5.1:1478262-1479962(-) | length=566 | sequence_SO=chromosome | SO=protein_coding	0.96615	0.955566	0.960858	0.00793787	1	11	11	11	7	8	7	8	7	8	30	30	30	63.029	566	566	4.5			3	12	8	2		1	0	32.916	0.81412	0.97995	16.899	23	0	Median	0.74769	0.96615	19.327	12	0	Median	0.85804
Tb927.4.4540	Tb927.4.4540	6	6	6	>Tb927.4.4540 | organism=Trypanosoma_brucei_TREU927 | product=hypothetical protein, conserved | location=Tb927_04_v5.1:1248153-1249189(-) | length=121 | sequence_SO=chromosome | SO=protein_coding	1.0133	0.909504	0.961402	0.0778468	1	6	6	6	6	4	6	4	6	4	72.7	72.7	72.7	13.155	121	121	8								11	0	17.257	0.81855	1.0188	14.841	8	0	Median	0.80984	1.0133	14.342	5	0	Median	0.91935
Tb927.5.3450	Tb927.5.3450	17	17	17	>Tb927.5.3450 | organism=Trypanosoma_brucei_TREU927 | product=hypothetical protein, conserved | location=Tb927_05_v5.1:1143746-1145329(-) | length=527 | sequence_SO=chromosome | SO=protein_coding	0.88261	1.04026	0.961434	0.118236	1	17	17	17	13	10	13	10	13	10	52.6	52.6	52.6	57.992	527	527	4.96				1	24				0	51.862	0.7717	0.91626	17.637	22	0	Median	0.68745	0.88261	17.768	12	0	Median	0.87596
Tb927.10.3570;Tb11.v5.1042	Tb927.10.3570	9;3	9;3	9;3	>Tb927.10.3570 | organism=Trypanosoma_brucei_TREU927 | product=KREX2 (KREX2) | location=Tb927_10_v5.1:924539-927262(+) | length=907 | sequence_SO=chromosome | SO=protein_coding	0.89722	1.02567	0.961446	0.0963394	2	9	9	9	6	6	6	6	6	6	17	17	17	99.416	907	907;351	3			13						0	30.614	0.79425	0.94618	14.529	9	0	Median	0.69234	0.89722	17.097	5	0	Median	0.87161
Tb927.4.1740	Tb927.4.1740	5	5	5	>Tb927.4.1740 | organism=Trypanosoma_brucei_TREU927 | product=hypothetical protein, conserved | location=Tb927_04_v5.1:441851-443119(-) | length=422 | sequence_SO=chromosome | SO=protein_coding	0.88973	1.03327	0.961501	0.107656	1	5	5	5	4	3	4	3	4	3	11.1	11.1	11.1	47.677	422	422	6.67					2		6	1	0	12.498	0.86523	0.95296	15.791	7	0	Median	0.71089	0.88973	8.0695	3	0	Median	0.88701
Tb927.10.6970;Tb927.10.6940	Tb927.10.6970;Tb927.10.6940	26;26	26;26	26;26	>Tb927.10.6970 | organism=Trypanosoma_brucei_TREU927 | product=dipeptidyl-peptidase 8-like serine peptidase,serine peptidase, Clan SC, Family S9B | location=Tb927_10_v5.1:1756887-1759439(+) | length=850 | sequence_SO=chromosome | SO=protein_coding;>Tb927.1	0.97939	0.943931	0.96166	0.0265946	2	26	26	26	22	24	22	24	22	24	46.2	46.2	46.2	93.683	850	850;850	3.02			55	1					0	165.08	0.86215	0.99976	9.7489	49	0	Median	0.7701	0.97939	9.4678	24	0	Median	0.94004
Tb927.10.15370;Tb11.v5.0480	Tb927.10.15370;Tb11.v5.0480	5;5	5;5	5;5	>Tb927.10.15370 | organism=Trypanosoma_brucei_TREU927 | product=RNA-binding protein RPC40, putative,DNA-directed RNA polymerase, alpha subunit, putative (RPC40) | location=Tb927_10_v5.1:3770218-3771231(+) | length=337 | sequence_SO=chromosome | SO=protein_	0.91664	1.00693	0.961784	0.0677157	2	5	5	5	5	3	5	3	5	3	29.1	29.1	29.1	37.377	337	337;337	6						9			0	11.678	0.72164	0.91664	27.347	7	0	Median	0.72164	0.91664	21.937	5	0	Median	0.90119
Tb927.4.1850	Tb927.4.1850	16	16	16	>Tb927.4.1850 | organism=Trypanosoma_brucei_TREU927 | product=hypothetical protein, conserved | location=Tb927_04_v5.1:462661-464397(-) | length=578 | sequence_SO=chromosome | SO=protein_coding	0.91371	1.01021	0.961962	0.0723774	1	16	16	16	11	14	11	14	11	14	37.2	37.2	37.2	64.384	578	578	4				27					0	41.806	0.82241	0.96028	14.611	25	0	Median	0.71829	0.91371	19.389	12	0	Median	0.85171
Tb927.1.3820	Tb927.1.3820	3	3	3	>Tb927.1.3820 | organism=Trypanosoma_brucei_TREU927 | product=ATP synthase subunit, putative | location=Tb927_01_v5.1:815748-816149(+) | length=133 | sequence_SO=chromosome | SO=protein_coding	0.90553	1.01851	0.962018	0.0847322	1	3	3	3	3	2	3	2	3	2	36.1	36.1	36.1	14.198	133	133	8								7	0	15.859	0.72466	0.92141	6.4524	7	0	Median	0.71787	0.90553	2.176	4	0	Median	0.83494
Tb927.6.4740	Tb927.6.4740	18	18	18	>Tb927.6.4740 | organism=Trypanosoma_brucei_TREU927 | product=importin-alpha re-exporter protein, putative,cellular apoptosis susceptibility protein, putative | location=Tb927_06_v5.1:1317878-1320760(+) | length=960 | sequence_SO=chromosome | SO=protein_co	0.92922	0.994827	0.962023	0.0492052	1	18	18	18	15	15	15	15	15	15	27.2	27.2	27.2	106.58	960	960	3			33						0	249.93	0.82131	0.98408	11.471	28	0	Median	0.73431	0.92922	11.316	14	0	Median	0.85346
Tb927.9.7110	Tb927.9.7110	14	14	14	>Tb927.9.7110 | organism=Trypanosoma_brucei_TREU927 | product=unspecified product | location=Tb927_09_v5.1:1154238-1155125(+) | length=295 | sequence_SO=chromosome | SO=protein_coding	0.97358	0.95048	0.96203	0.017325	1	14	14	14	12	14	12	14	12	14	54.2	54.2	54.2	32.572	295	295	6.67						31	11	13	0	148.66	0.81675	1.0108	11.965	40	0	Median	0.77823	0.97358	9.3044	23	0	Median	0.92955
Tb927.3.2960	Tb927.3.2960	18	18	18	>Tb927.3.2960 | organism=Trypanosoma_brucei_TREU927 | product=inosine-adenosine-guanosine-nucleosidehydrolase,IAG-nucleoside hydrolase (IAGNH) | location=Tb927_03_v5.1:763717-764700(-) | length=327 | sequence_SO=chromosome | SO=protein_coding	0.93106	0.993049	0.962054	0.0464915	1	18	18	18	17	15	17	15	17	15	67.9	67.9	67.9	35.848	327	327	6.12	2			1		60	12	5	0	162.87	0.7793	0.95223	16.285	72	0	Median	0.72649	0.93106	17.8	44	0	Median	0.87212
Tb927.3.2050	Tb927.3.2050	6	6	6	>Tb927.3.2050 | organism=Trypanosoma_brucei_TREU927 | product=hypothetical protein, conserved | location=Tb927_03_v5.1:534244-538962(-) | length=1572 | sequence_SO=chromosome | SO=protein_coding	1.105	0.819336	0.962168	0.214248	1	6	6	6	3	4	3	4	3	4	4.6	4.6	4.6	172.41	1572	1572	1.88	4	1	3						0	10.776	1.0805	1.2205	26.209	7	0	Median	0.86881	1.105	36.268	3	1	Median	1.0805
Tb927.9.11000	Tb927.9.11000	6	6	6	>Tb927.9.11000 | organism=Trypanosoma_brucei_TREU927 | product=small GTPase, putative,GTP-binding protein, putative (RAB7) | location=Tb927_09_v5.1:1732962-1733381(-) | length=139 | sequence_SO=chromosome | SO=protein_coding	0.9475	0.97704	0.96227	0.0221547	1	6	6	6	5	5	5	5	5	5	40.3	40.3	40.3	14.819	139	139	7							11		0	40.766	0.74463	0.9566	10.073	11	0	Median	0.74224	0.9475	7.8757	6	0	Median	0.88493
Tb927.8.1870	Tb927.8.1870	28	28	28	>Tb927.8.1870 | organism=Trypanosoma_brucei_TREU927 | product=Golgi/lysosome glycoprotein 1 (tGLP1) | location=Tb927_08_v5.1:610606-612456(-) | length=616 | sequence_SO=chromosome | SO=protein_coding	0.95328	0.971345	0.962313	0.013549	1	28	28	28	26	25	26	25	26	25	49.8	49.8	49.8	67.597	616	616	4.3		5	21	77	27	5	13		0	225.21	0.80102	0.98483	11.794	139	0	Median	0.74982	0.95328	12.864	77	0	Median	0.88904
Tb927.11.4200	Tb927.11.4200	7	7	7	>Tb927.11.4200 | organism=Trypanosoma_brucei_TREU927 | product=lectin, putative,mannose-specific lectin, putative | location=Tb927_11_v5.1:1227471-1229108(-) | length=545 | sequence_SO=chromosome | SO=protein_coding	0.97342	0.951384	0.962402	0.0165268	1	7	7	7	6	5	6	5	6	5	17.8	17.8	17.8	62.272	545	545	3.89			13	3			1	2	0	31.859	0.82263	0.98478	15.707	19	0	Median	0.77252	0.97342	15.134	12	0	Median	0.91408
Tb927.1.3830	Tb927.1.3830	34	34	34	>Tb927.1.3830 | organism=Trypanosoma_brucei_TREU927 | product=glucose-6-phosphate isomerase, glycosomal (PGI) | location=Tb927_01_v5.1:816419-818242(+) | length=607 | sequence_SO=chromosome | SO=protein_coding	0.9571	0.967961	0.96253	0.00814538	1	34	34	34	31	33	31	33	31	33	63.3	63.3	63.3	67.614	607	607	4.01	18	18	5	148	44	15	4	3	0	254.36	0.80968	1.0016	15.694	221	0	Median	0.75144	0.9571	14.422	122	0	Median	0.88408
Tb927.9.7080	Tb927.9.7080	5	5	5	>Tb927.9.7080 | organism=Trypanosoma_brucei_TREU927 | product=hypothetical protein, conserved | location=Tb927_09_v5.1:1149145-1149525(+) | length=126 | sequence_SO=chromosome | SO=protein_coding	0.99428	0.930925	0.962603	0.047516	1	5	5	5	3	4	3	4	3	4	44.4	44.4	44.4	13.925	126	126	8								8	0	46.859	0.8191	1.0319	12.431	8	0	Median	0.7901	0.99428	10.446	4	0	Median	0.92338
Tb927.8.8280	Tb927.8.8280	6	6	6	>Tb927.8.8280 | organism=Trypanosoma_brucei_TREU927 | product=hypothetical protein, conserved | location=Tb927_08_v5.1:2450645-2452474(+) | length=262 | sequence_SO=chromosome | SO=protein_coding	0.90553	1.01974	0.962636	0.0856592	1	6	6	6	5	5	5	5	5	5	30.9	30.9	30.9	30.098	262	262	6.18						9	2		0	7.2641	0.74836	0.93692	12.693	10	0	Median	0.72451	0.90553	7.9768	5	0	Median	0.83996
Tb927.4.2110	Tb927.4.2110	6	6	6	>Tb927.4.2110 | organism=Trypanosoma_brucei_TREU927 | product=protein phosphatase 2C, putative | location=Tb927_04_v5.1:546741-547823(+) | length=314 | sequence_SO=chromosome | SO=protein_coding	1.0021	0.923361	0.962731	0.0590542	1	6	6	6	5	4	5	4	5	4	26.1	26.1	26.1	33.456	314	314	6.95						7	6	6	0	17.517	0.8843	1.0369	13.98	14	0	Median	0.81245	1.0021	11.479	8	0	Median	0.9838
Tb927.5.1000	Tb927.5.1000	10	10	10	>Tb927.5.1000 | organism=Trypanosoma_brucei_TREU927 | product=ubiquitin-conjugating enzyme E2, putative,ubiquitin carrier protein, putative,ubiquitin-protein ligase, putative | location=Tb927_05_v5.1:385346-385792(+) | length=148 | sequence_SO=chromosome |	0.96146	0.964134	0.962797	0.00200566	1	10	10	10	9	9	9	9	9	9	84.5	84.5	84.5	16.766	148	148	7.74						1	8	30	0	248.23	0.8377	1.0134	9.5738	39	0	Median	0.75573	0.96146	10.279	17	0	Median	0.8956
Tb927.9.8450	Tb927.9.8450	18	18	18	>Tb927.9.8450 | organism=Trypanosoma_brucei_TREU927 | product=adenylate kinase (ADKG) | location=Tb927_09_v5.1:1374365-1374967(-) | length=200 | sequence_SO=chromosome | SO=protein_coding	0.93388	0.991867	0.962873	0.04349	1	18	18	18	16	11	16	11	16	11	88.5	88.5	88.5	22.44	200	200	7.12							30	4	0	91.251	0.76591	0.95864	16.659	29	0	Median	0.7378	0.93388	7.1926	19	0	Median	0.85901
Tb927.7.4820;Tb11.v5.0164	Tb927.7.4820;Tb11.v5.0164	5;5	5;5	5;5	>Tb927.7.4820 | organism=Trypanosoma_brucei_TREU927 | product=hypothetical protein, conserved | location=Tb927_07_v5.1:1270606-1270989(-) | length=127 | sequence_SO=chromosome | SO=protein_coding;>Tb11.v5.0164 | organism=Trypanosoma_brucei_TREU927 | produc	0.92987	0.996016	0.962943	0.0496095	2	5	5	5	4	3	4	3	4	3	50.4	50.4	50.4	14.71	127	127;157	8								7	0	48.533	0.77676	0.96623	16.155	6	0	Median	0.72695	0.92987	11.061	3	0	Median	0.85469
Tb927.1.700	Tb927.1.700	41	41	15	>Tb927.1.700 | organism=Trypanosoma_brucei_TREU927 | product=phosphoglycerate kinase (PGKC) | location=Tb927_01_v5.1:231788-233110(-) | length=440 | sequence_SO=chromosome | SO=protein_coding	0.92065	1.00531	0.962979	0.0634935	1	41	41	15	39	35	39	35	15	10	88	88	32	47.245	440	440	5.07	24	20	16	12	126	56	28	37	0	323.31	0.75803	0.95336	18.761	287	0	Median	0.71889	0.92065	16.456	172	0	Median	0.85122
Tb927.10.15360	Tb927.10.15360	26	26	26	>Tb927.10.15360 | organism=Trypanosoma_brucei_TREU927 | product=hypothetical protein, conserved | location=Tb927_10_v5.1:3763602-3768911(+) | length=1769 | sequence_SO=chromosome | SO=protein_coding	1.0101	0.916254	0.963177	0.0703842	1	26	26	26	24	10	24	10	24	10	23	23	23	191.99	1769	1769	2.55	1	34	3				3	1	0	51.928	0.81082	1.0235	23.563	35	0	Median	0.802	1.0101	13.384	26	0	Median	0.9734
Tb927.10.4310;Tb10.v4.0045	Tb927.10.4310;Tb10.v4.0045	11;11	11;11	11;11	>Tb927.10.4310 | organism=Trypanosoma_brucei_TREU927 | product=prohibitin 2, putative (PHB2) | location=Tb927_10_v5.1:1121153-1122040(+) | length=295 | sequence_SO=chromosome | SO=protein_coding;>Tb10.v4.0045 | organism=Trypanosoma_brucei_TREU927 | product	0.97607	0.95048	0.963275	0.0191925	2	11	11	11	8	6	8	6	8	6	43.4	43.4	43.4	32.215	295	295;295	6.12						15	2		0	42.432	0.78129	0.97961	9.1145	13	0	Median	0.75826	0.97607	9.1888	10	0	Median	0.89845
Tb927.11.11080	Tb927.11.11080	8	8	8	>Tb927.11.11080 | organism=Trypanosoma_brucei_TREU927 | product=Nucleoporin (TbNup149) | location=Tb927_11_v5.1:2966881-2971249(+) | length=1439 | sequence_SO=chromosome | SO=protein_coding	1.0799	0.846883	0.963392	0.174762	1	8	8	8	7	3	7	3	7	3	35	35	35	149.23	1439	1439	4.18		7						4	0	18.111	0.89684	1.1123	23.02	9	0	Median	0.84977	1.0799	25.112	7	0	Median	0.97904
Tb927.10.2240	Tb927.10.2240	22	22	22	>Tb927.10.2240 | organism=Trypanosoma_brucei_TREU927 | product=hypothetical protein, conserved | location=Tb927_10_v5.1:578334-580100(+) | length=588 | sequence_SO=chromosome | SO=protein_coding	0.91755	1.0094	0.963474	0.0688856	1	22	22	22	20	17	20	17	20	17	47.4	47.4	47.4	66.352	588	588	5.38		1	1	28	18	4	25	3	0	182.68	0.77259	0.96455	13.058	71	0	Median	0.71246	0.91755	14.486	41	0	Median	0.8588
Tb927.11.5440	Tb927.11.5440	30	30	30	>Tb927.11.5440 | organism=Trypanosoma_brucei_TREU927 | product=malic enzyme | location=Tb927_11_v5.1:1546913-1548607(+) | length=564 | sequence_SO=chromosome | SO=protein_coding	0.93273	0.994233	0.963482	0.0461276	1	30	30	30	22	29	22	29	22	29	67	67	67	61.506	564	564	4.3				60	26				0	115.59	0.78101	0.96702	13.244	73	0	Median	0.72204	0.93273	11.861	42	0	Median	0.85347
Tb927.9.14080	Tb927.9.14080	8	8	8	>Tb927.9.14080 | organism=Trypanosoma_brucei_TREU927 | product=vesicle-associated membrane protein, putative | location=Tb927_09_v5.1:2198690-2199336(-) | length=205 | sequence_SO=chromosome | SO=protein_coding	0.97939	0.947777	0.963584	0.0237094	1	8	8	8	8	6	8	6	8	6	53.2	53.2	53.2	23.167	205	205	7.06							15	1	0	59.784	0.77357	0.98152	11.299	15	0	Median	0.74064	0.97939	8.6281	9	0	Median	0.8599
Tb927.9.7770	Tb927.9.7770	16	16	16	>Tb927.9.7770 | organism=Trypanosoma_brucei_TREU927 | product=spermidine synthase (SpSyn) | location=Tb927_09_v5.1:1275669-1276565(-) | length=298 | sequence_SO=chromosome | SO=protein_coding	0.91297	1.01429	0.963631	0.075991	1	16	16	16	12	13	12	13	12	13	63.1	63.1	63.1	32.926	298	298	6.16						31	6		0	140.81	0.76695	0.94244	8.8471	31	0	Median	0.71252	0.91297	7.0137	17	0	Median	0.88666
Tb927.10.7020	Tb927.10.7020	6	6	6	>Tb927.10.7020 | organism=Trypanosoma_brucei_TREU927 | product=acid phosphatase, putative | location=Tb927_10_v5.1:1768266-1769573(+) | length=435 | sequence_SO=chromosome | SO=protein_coding	1.0382	0.889205	0.963703	0.111746	1	6	6	6	5	3	5	3	5	3	23	23	23	49.918	435	435	5					8				0	11.075	0.88708	1.0805	20.787	8	0	Median	0.81272	1.0382	16.942	5	0	Median	1.019
Tb927.1.860	Tb927.1.860	3	3	3	>Tb927.1.860 | organism=Trypanosoma_brucei_TREU927 | product=hypothetical protein, conserved | location=Tb927_01_v5.1:261392-262198(-) | length=268 | sequence_SO=chromosome | SO=protein_coding	1.0565	0.871004	0.963752	0.139122	1	3	3	3	2	2	2	2	2	2	20.1	20.1	20.1	29.562	268	268	6						4			0	25.745	0.89804	1.0861	10.88	4	0	Median	0.84497	1.0565	9.8165	2	0	Median	1.0118
Tb927.7.6670;Tb11.v5.0444	Tb927.7.6670	38;13	38;13	38;13	>Tb927.7.6670 | organism=Trypanosoma_brucei_TREU927 | product=hypothetical protein, conserved | location=Tb927_07_v5.1:1829473-1838584(-) | length=3030 | sequence_SO=chromosome | SO=protein_coding	0.87764	1.0499	0.963771	0.129196	2	38	38	38	8	37	8	37	8	37	17.5	17.5	17.5	332.9	3030	3030;949	1	47								0	241.56	0.81292	0.95149	18.721	39	0	Median	0.71569	0.87764	33.542	7	0	Median	0.82557
Tb927.11.1420	Tb927.11.1420	22	22	22	>Tb927.11.1420 | organism=Trypanosoma_brucei_TREU927 | product=hypothetical protein, conserved | location=Tb927_11_v5.1:417336-419918(+) | length=860 | sequence_SO=chromosome | SO=protein_coding	0.92573	1.00182	0.963777	0.05707	1	22	22	22	18	17	18	17	18	17	41.2	41.2	41.2	94.838	860	860	3.92			3	35					0	64.373	0.83078	0.98037	14.963	32	0	Median	0.74577	0.92573	18.181	16	0	Median	0.85339
Tb927.10.12590	Tb927.10.12590	23	23	23	>Tb927.10.12590 | organism=Trypanosoma_brucei_TREU927 | product=hypothetical protein, conserved | location=Tb927_10_v5.1:3050413-3053214(-) | length=933 | sequence_SO=chromosome | SO=protein_coding	0.99052	0.937383	0.963951	0.0398529	1	23	23	23	21	21	21	21	21	21	44.8	44.8	44.8	105.85	933	933	1.82	41	5	1	13	1				0	179.5	0.83074	1.0254	12.884	56	0	Median	0.78404	0.99052	10.467	29	0	Median	0.94059
Tb927.10.6080;Tb11.v5.0200	Tb927.10.6080;Tb11.v5.0200	16;16	16;16	16;16	>Tb927.10.6080 | organism=Trypanosoma_brucei_TREU927 | product=proteasome beta 5 subunit, putative,proteasome beta 5 subunit (PRCE) | location=Tb927_10_v5.1:1533450-1534382(-) | length=310 | sequence_SO=chromosome | SO=protein_coding;>Tb11.v5.0200 | organi	0.97224	0.955749	0.963994	0.0123684	2	16	16	16	15	9	15	9	15	9	56.8	56.8	56.8	34.416	310	310;310	7.07							25	2	0	71.547	0.7862	0.98107	14.33	25	0	Median	0.75935	0.97224	16.468	17	0	Median	0.91797
Tb927.11.11250	Tb927.11.11250	21	21	21	>Tb927.11.11250 | organism=Trypanosoma_brucei_TREU927 | product=cytosolic malate dehydrogenase (cMDH) | location=Tb927_11_v5.1:3011678-3012664(+) | length=328 | sequence_SO=chromosome | SO=protein_coding	0.9658	0.962279	0.964039	0.00264099	1	21	21	21	20	17	20	17	20	17	59.8	59.8	59.8	35.151	328	328	6.35						49	4	9	0	195.16	0.81904	0.99113	9.1608	51	0	Median	0.75593	0.9658	8.957	28	0	Median	0.93194
Tb927.10.6670	Tb927.10.6670	7	7	7	>Tb927.10.6670 | organism=Trypanosoma_brucei_TREU927 | product=dynein light chain, putative | location=Tb927_10_v5.1:1685431-1685808(+) | length=125 | sequence_SO=chromosome | SO=protein_coding	0.93689	0.991375	0.964133	0.0408638	1	7	7	7	6	5	6	5	6	5	62.4	62.4	62.4	14.101	125	125	8								12	0	15.077	0.75326	0.95555	11.572	11	0	Median	0.74557	0.93689	12.381	6	0	Median	0.89677
Tb927.6.3050	Tb927.6.3050	14	14	14	>Tb927.6.3050 | organism=Trypanosoma_brucei_TREU927 | product=aldehyde dehydrogenase family, putative | location=Tb927_06_v5.1:904935-906566(+) | length=543 | sequence_SO=chromosome | SO=protein_coding	0.93488	0.993443	0.964162	0.0439225	1	14	14	14	10	13	10	13	10	13	37	37	37	59.689	543	543	4.07				26	2				0	63.077	0.80432	0.97767	9.2875	25	0	Median	0.72701	0.93488	8.4147	13	0	Median	0.8674
Tb927.11.2840	Tb927.11.2840	4	4	4	>Tb927.11.2840 | organism=Trypanosoma_brucei_TREU927 | product=hypothetical protein, conserved | location=Tb927_11_v5.1:833084-833734(-) | length=194 | sequence_SO=chromosome | SO=protein_coding	0.96225	0.966184	0.964217	0.00295018	1	4	4	4	3	3	3	3	3	3	24.2	24.2	24.2	22.354	194	194	7							8		0	33.208	0.78244	0.96812	19.806	7	0	Median	0.761	0.96225	17.956	4	0	Median	0.92347
Tb927.2.4445	Tb927.2.4445	4	4	4	>Tb927.2.4445 | organism=Trypanosoma_brucei_TREU927 | product=hypothetical protein, conserved | location=Tb927_02_v5.1:787612-788013(-) | length=133 | sequence_SO=chromosome | SO=protein_coding	0.95357	0.975324	0.964447	0.0163157	1	4	4	4	3	4	3	4	3	4	44.4	44.4	44.4	15.441	133	133	8								8	0	53.921	0.79574	0.95777	12.942	7	0	Median	0.76331	0.95357	6.0076	4	0	Median	0.85566
Tb927.11.8770	Tb927.11.8770	7	7	7	>Tb927.11.8770 | organism=Trypanosoma_brucei_TREU927 | product=ATP-dependent RNA helicase FAL1, putative | location=Tb927_11_v5.1:2410573-2411778(+) | length=401 | sequence_SO=chromosome | SO=protein_coding	1.0368	0.89222	0.96451	0.108435	1	7	7	7	5	6	5	6	5	6	22.9	22.9	22.9	45.516	401	401	5.36					9	5			0	27.107	0.845	1.0469	20.814	12	0	Median	0.83492	1.0368	24.447	7	0	Median	1.0108
Tb927.8.2520;Tb927.8.2790	Tb927.8.2520	24;2	24;2	24;2	>Tb927.8.2520 | organism=Trypanosoma_brucei_TREU927 | product=acetyl-CoA synthetase, putative | location=Tb927_08_v5.1:743395-745416(+) | length=673 | sequence_SO=chromosome | SO=protein_coding	0.98596	0.943485	0.964723	0.0318561	2	24	24	24	23	18	23	18	23	18	49.2	49.2	49.2	74.666	673	673;106	4.23			2	50			1	3	0	116.59	0.83619	1.0252	12.806	53	0	Median	0.78017	0.98596	14.471	30	0	Median	0.94005
Tb927.11.15750	Tb927.11.15750	23	23	23	>Tb927.11.15750 | organism=Trypanosoma_brucei_TREU927 | product=AMP deaminase, putative | location=Tb927_11_v5.1:4169121-4173374(-) | length=1417 | sequence_SO=chromosome | SO=protein_coding	0.96274	0.966744	0.964742	0.003003	1	23	23	23	22	11	22	11	22	11	23	23	23	163.21	1417	1417	2.03		34	1						0	96.152	0.7934	0.97293	16.561	29	0	Median	0.75736	0.96274	17.217	19	0	Median	0.92328
Tb927.7.3620	Tb927.7.3620	18	18	18	>Tb927.7.3620 | organism=Trypanosoma_brucei_TREU927 | product=tyrosyl-tRNA synthetase, putative | location=Tb927_07_v5.1:941013-943106(-) | length=697 | sequence_SO=chromosome | SO=protein_coding	0.89979	1.02978	0.964786	0.0974935	1	18	18	18	16	16	16	16	16	16	36.9	36.9	36.9	76.657	697	697	4				37					0	100.07	0.76701	0.96385	14.494	36	0	Median	0.71542	0.89979	14.433	19	0	Median	0.83089
Tb927.9.13990	Tb927.9.13990	15	15	15	>Tb927.9.13990 | organism=Trypanosoma_brucei_TREU927 | product=RNA-binding protein, putative (DRBD2) | location=Tb927_09_v5.1:2183754-2185266(-) | length=305 | sequence_SO=chromosome | SO=protein_coding	0.93306	0.996512	0.964786	0.0475892	1	15	15	15	14	11	14	11	14	11	47.2	47.2	47.2	34.618	305	305	6.77						31	7	18	0	99.787	0.80909	0.96324	15.769	48	0	Median	0.73888	0.93306	13.365	30	0	Median	0.89611
Tb927.2.3280;Tb927.2.3310;Tb927.2.3300;Tb927.2.3290	Tb927.2.3280;Tb927.2.3310;Tb927.2.3300;Tb927.2.3290	6;5;5;5	3;2;2;2	2;2;2;2	>Tb927.2.3280 | organism=Trypanosoma_brucei_TREU927 | product=65 kDa invariant surface glycoprotein | location=Tb927_02_v5.1:600521-602904(+) | length=436 | sequence_SO=chromosome | SO=protein_coding;>Tb927.2.3310 | organism=Trypanosoma_brucei_TREU927 | pr	0.98181	0.947777	0.964794	0.0255244	4	6	3	2	5	4	2	2	2	1	9.4	5.5	3.9	48.281	436	436;436;436;436	4				4					0.00079177	2.2084	0.86266	1.0551	7.3545	4	0	Median	0.77979	0.98181	10.505	2	0	Median	0.8733
Tb927.2.830;Tb11.v5.0655	Tb927.2.830;Tb11.v5.0655	16;16	5;5	3;3	>Tb927.2.830 | organism=Trypanosoma_brucei_TREU927 | product=retrotransposon hot spot protein (RHS, pseudogene), putative,retrotransposon hot spot protein 1 (RHS1), interrupted | location=Tb927_02_v5.1:143717-144772(-) | length=352 | sequence_SO=chromosome	0.95103	0.979048	0.965039	0.0210138	2	16	5	3	11	14	3	5	2	3	47.4	18.2	13.1	40.504	352	352;427	3			8						0	15.453	0.8809	1.0081	12.57	8	0	Median	0.75944	0.95103	20.899	3	0	Median	0.88801
Tb927.2.2670	Tb927.2.2670	8	5	5	>Tb927.2.2670 | organism=Trypanosoma_brucei_TREU927 | product=histone H4 variant | location=Tb927_02_v5.1:531130-531432(+) | length=100 | sequence_SO=chromosome | SO=protein_coding	1.0304	0.899766	0.965083	0.0979755	1	8	5	5	8	6	5	3	5	3	47	32	32	11.253	100	100	8								10	0	10.696	0.84336	1.0492	14.583	10	0	Median	0.82854	1.0304	11.995	6	0	Median	0.98745
Tb927.11.14590	Tb927.11.14590	9	9	9	>Tb927.11.14590 | organism=Trypanosoma_brucei_TREU927 | product=hypothetical protein, conserved | location=Tb927_11_v5.1:3872610-3874499(+) | length=629 | sequence_SO=chromosome | SO=protein_coding	0.8667	1.06348	0.96509	0.147584	1	9	9	9	6	8	6	8	6	8	22.7	22.7	22.7	70.339	629	629	4.06				17	1				0	32.7	0.8294	0.92692	18.477	14	0	Median	0.69791	0.8667	23.993	7	0	Median	0.85028
Tb927.5.3920	Tb927.5.3920	10	10	10	>Tb927.5.3920 | organism=Trypanosoma_brucei_TREU927 | product=peroxisome assembly protein, putative | location=Tb927_05_v5.1:1273846-1276794(+) | length=982 | sequence_SO=chromosome | SO=protein_coding	1.0236	0.906783	0.965191	0.0876129	1	10	10	10	7	6	7	6	7	6	14.4	14.4	14.4	106.05	982	982	2.92		1	12						0	58.55	0.8491	1.0435	17.508	12	0	Median	0.80363	1.0236	12.783	6	0	Median	0.98154
Tb927.1.1670;Tb11.v5.0887	Tb927.1.1670;Tb11.v5.0887	46;23	46;23	46;23	>Tb927.1.1670 | organism=Trypanosoma_brucei_TREU927 | product=hypothetical protein, conserved | location=Tb927_01_v5.1:420033-423280(+) | length=1081 | sequence_SO=chromosome | SO=protein_coding;>Tb11.v5.0887 | organism=Trypanosoma_brucei_TREU927 | product	0.99118	0.93932	0.96525	0.0388951	2	46	46	46	36	39	36	39	36	39	57.1	57.1	57.1	120.87	1081	1081;566	3.01		4	85	5					0	290.99	0.86183	1.0291	12.712	84	0	Median	0.78507	0.99118	12.778	38	0	Median	0.91423
Tb927.7.2240	Tb927.7.2240	19	19	19	>Tb927.7.2240 | organism=Trypanosoma_brucei_TREU927 | product=hypothetical protein, conserved | location=Tb927_07_v5.1:578374-580008(-) | length=544 | sequence_SO=chromosome | SO=protein_coding	0.99767	0.932836	0.965253	0.0486256	1	19	19	19	19	15	19	15	19	15	41.9	41.9	41.9	59.665	544	544	4.65				40	26	2	6		0	109.91	0.83076	1.0468	15.677	69	0	Median	0.79822	0.99767	13.137	42	0	Median	0.89147
Tb927.3.4790;Tb927.3.4750	Tb927.3.4790;Tb927.3.4750	36;36	36;36	36;36	>Tb927.3.4790 | organism=Trypanosoma_brucei_TREU927 | product=aminopeptidase, putative,metallo-peptidase, Clan MA(E) Family M1 | location=Tb927_03_v5.1:1349602-1352217(-) | length=871 | sequence_SO=chromosome | SO=protein_coding;>Tb927.3.4750 | organism=Tr	0.95547	0.975324	0.965397	0.0148907	2	36	36	36	28	32	28	32	28	32	48.9	48.9	48.9	97.251	871	871;871	3.51		1	66	21	1	3	2	2	0	227.58	0.81113	0.98886	13.29	84	0	Median	0.76065	0.95547	14.5	39	0	Median	0.90016
Tb927.11.10200	Tb927.11.10200	8	8	8	>Tb927.11.10200 | organism=Trypanosoma_brucei_TREU927 | product=hypothetical protein, conserved | location=Tb927_11_v5.1:2728749-2730221(+) | length=490 | sequence_SO=chromosome | SO=protein_coding	0.95817	0.972952	0.965561	0.0110865	1	8	8	8	5	5	5	5	5	5	21.4	21.4	21.4	53.432	490	490	4.73				4	6	1			0	11.895	0.85375	0.99238	17.345	8	0	Median	0.7628	0.95817	21.737	3	0	Median	0.85937
Tb927.11.10690	Tb927.11.10690	15	15	15	>Tb927.11.10690 | organism=Trypanosoma_brucei_TREU927 | product=hypothetical protein, conserved | location=Tb927_11_v5.1:2862376-2863602(+) | length=408 | sequence_SO=chromosome | SO=protein_coding	0.96542	0.96581	0.965615	0.000292736	1	15	15	15	14	13	14	13	14	13	49.5	49.5	49.5	45.229	408	408	4.93				5	37	2			0	83.775	0.82185	0.96928	19.465	43	0	Median	0.7434	0.96542	22.128	24	0	Median	0.87749
Tb927.7.4700	Tb927.7.4700	28	2	2	>Tb927.7.4700 | organism=Trypanosoma_brucei_TREU927 | product=hypothetical protein, conserved | location=Tb927_07_v5.1:1250185-1252281(-) | length=698 | sequence_SO=chromosome | SO=protein_coding	0.95303	0.978282	0.965656	0.0189391	1	28	2	2	26	25	2	2	2	2	49.1	5	5	77.7	698	698	3.75			1	3					0	6.2858	0.77257	0.99652	5.773	4	0	Median	0.71774	0.95303	6.2153	2	0	Median	0.85751
Tb927.11.2520	Tb927.11.2520	22	22	22	>Tb927.11.2520 | organism=Trypanosoma_brucei_TREU927 | product=UDP-N-acetylglucosamine pyrophosphorylase, putative | location=Tb927_11_v5.1:743276-744913(-) | length=545 | sequence_SO=chromosome | SO=protein_coding	0.91875	1.01262	0.965684	0.0704004	1	22	22	22	18	14	18	14	18	14	58.7	58.7	58.7	60.161	545	545	3.91	1			33					0	105.54	0.78554	0.96426	10.217	33	0	Median	0.74123	0.91875	10.197	19	0	Median	0.89717
Tb927.8.7720	Tb927.8.7720	9	9	9	>Tb927.8.7720 | organism=Trypanosoma_brucei_TREU927 | product=hypothetical protein, conserved | location=Tb927_08_v5.1:2222999-2223676(+) | length=225 | sequence_SO=chromosome | SO=protein_coding	1.0615	0.869943	0.965722	0.143667	1	9	9	9	8	6	8	6	8	6	41.3	41.3	41.3	24.902	225	225	7.11							16	2	0	120.08	0.89762	1.1101	19.848	14	0	Median	0.85155	1.0615	25.009	8	0	Median	0.9574
Tb927.10.6220	Tb927.10.6220	6	6	6	>Tb927.10.6220 | organism=Trypanosoma_brucei_TREU927 | product=5-3 exoribonuclease 2, putative (XRND) | location=Tb927_10_v5.1:1575991-1578396(-) | length=801 | sequence_SO=chromosome | SO=protein_coding	0.92068	1.01081	0.965743	0.0675941	1	6	6	6	5	3	5	3	5	3	10.9	10.9	10.9	90.941	801	801	3			8						0	16.887	0.7703	0.98931	14.769	7	0	Median	0.72443	0.92068	11.735	5	0	Median	0.82732
Tb927.8.920	Tb927.8.920	4	4	4	>Tb927.8.920 | organism=Trypanosoma_brucei_TREU927 | product=ubiquitin-conjugating enzyme E2, putative,ubiquitin-protein ligase, putative,ubiquitin carrier protein, putative | location=Tb927_08_v5.1:285476-285994(-) | length=172 | sequence_SO=chromosome |	1.0188	0.912742	0.965771	0.0795436	1	4	4	4	4	4	4	4	4	4	32.6	32.6	32.6	18.992	172	172	8								9	0	50.096	0.83105	1.0612	17.685	9	0	Median	0.81939	1.0188	11.633	5	0	Median	0.99014
Tb927.10.2020	Tb927.10.2020	45	3	1	>Tb927.10.2020 | organism=Trypanosoma_brucei_TREU927 | product=hexokinase (HK2) | location=Tb927_10_v5.1:529818-531233(+) | length=471 | sequence_SO=chromosome | SO=protein_coding	1.0991	0.832917	0.966008	0.199637	1	45	3	1	45	39	3	2	1	0	73.5	7.9	3.6	51.148	471	471	5.45	1		1	6	15	4	8	3	0	137.82	0.90278	1.1555	17.611	36	0	Median	0.83846	1.0991	17.655	21	0	Median	0.99784
Tb927.10.3260;Tb11.v5.0825	Tb927.10.3260	41;16	41;16	41;16	>Tb927.10.3260 | organism=Trypanosoma_brucei_TREU927 | product=Long-chain-fatty-acid--CoA ligase 5 (EC 6.2.1.3) (Long-chain acyl-CoA synthetase 5) (LACS 5), putative | location=Tb927_10_v5.1:841483-843594(+) | length=703 | sequence_SO=chromosome | SO=prote	0.9749	0.957396	0.966148	0.0131281	2	41	41	41	39	35	39	35	39	35	57.6	57.6	57.6	78.983	703	703;289	4.66	3	2	4	95	12	21	13	7	0	186.97	0.8093	1.0088	14.434	135	0	Median	0.76308	0.9749	13.594	81	0	Median	0.90238
Tb927.9.9780	Tb927.9.9780	11	11	11	>Tb927.9.9780 | organism=Trypanosoma_brucei_TREU927 | product=peptidyl-prolyl cis-trans isomerase (cyclophilin- 40), putative,cyclophilin-40, putative | location=Tb927_09_v5.1:1555463-1556557(-) | length=354 | sequence_SO=chromosome | SO=protein_coding	0.93345	0.9993	0.966375	0.0493879	1	11	11	11	10	9	10	9	10	9	46	46	46	38.095	354	354	6.53						21	2	7	0	103.18	0.77615	0.94342	12.004	27	0	Median	0.73063	0.93345	9.5013	15	0	Median	0.88573
Tb927.11.530	Tb927.11.530	7	7	7	>Tb927.11.530 | organism=Trypanosoma_brucei_TREU927 | product=RNA-binding protein, putative (RBP3) | location=Tb927_11_v5.1:132186-132788(-) | length=200 | sequence_SO=chromosome | SO=protein_coding	0.95441	0.978474	0.966442	0.0180477	1	7	7	7	6	4	6	4	6	4	43	43	43	22.331	200	200	7.77							3	10	0	63.406	0.83646	1.0148	25.13	11	0	Median	0.75212	0.95441	16.621	6	0	Median	0.9308
Tb927.8.4430	Tb927.8.4430	28	28	28	>Tb927.8.4430 | organism=Trypanosoma_brucei_TREU927 | product=uridine phosphorylase | location=Tb927_08_v5.1:1315427-1317090(-) | length=341 | sequence_SO=chromosome | SO=protein_coding	0.97383	0.959141	0.966485	0.011017	1	28	28	28	26	23	26	23	26	23	76.2	76.2	76.2	36.925	341	341	6.48						79	29	15	0	220.67	0.80215	1.0041	11.179	106	0	Median	0.76067	0.97383	9.6119	60	0	Median	0.90256
Tb927.6.2860	Tb927.6.2860	7	7	7	>Tb927.6.2860 | organism=Trypanosoma_brucei_TREU927 | product=hypothetical protein, conserved | location=Tb927_06_v5.1:859092-860459(+) | length=455 | sequence_SO=chromosome | SO=protein_coding	1.0951	0.838364	0.966732	0.192552	1	7	7	7	6	5	6	5	6	5	23.3	23.3	23.3	48.966	455	455	5.08					12	1			0	20.738	0.88375	1.1093	18.639	12	0	Median	0.86774	1.0951	14.17	7	0	Median	1.0902
Tb927.4.2000;Tb927.7.7270	Tb927.4.2000	21;1	21;1	21;1	>Tb927.4.2000 | organism=Trypanosoma_brucei_TREU927 | product=ruvB-like DNA helicase, putative,ATP-dependent DNA helicase, putative | location=Tb927_04_v5.1:505366-506790(-) | length=474 | sequence_SO=chromosome | SO=protein_coding	0.95747	0.976276	0.966873	0.0141049	2	21	21	21	18	15	18	15	18	15	50	50	50	52.61	474	474;788	5					40				0	91.015	0.81773	0.98723	16.574	37	0	Median	0.74453	0.95747	18.19	21	0	Median	0.89248
Tb927.6.5110	Tb927.6.5110	11	11	11	>Tb927.6.5110 | organism=Trypanosoma_brucei_TREU927 | product=damage-specific DNA binding protein, putative | location=Tb927_06_v5.1:1397764-1401576(+) | length=1270 | sequence_SO=chromosome | SO=protein_coding	0.89247	1.04173	0.967101	0.111946	1	11	11	11	9	5	9	5	9	5	12.8	12.8	12.8	138.21	1270	1270	2		14							0	44.691	0.76241	0.90942	13.885	10	0	Median	0.70203	0.89247	15.827	6	0	Median	0.85224
Tb927.3.2090;Tb11.v5.0697	Tb927.3.2090;Tb11.v5.0697	15;13	15;13	15;13	>Tb927.3.2090 | organism=Trypanosoma_brucei_TREU927 | product=aminopeptidase P1, putative,metallo-peptidase, Clan MG, Family M24 | location=Tb927_03_v5.1:549317-551164(-) | length=615 | sequence_SO=chromosome | SO=protein_coding;>Tb11.v5.0697 | organism=Tr	0.93375	1.00069	0.96722	0.0502054	2	15	15	15	12	8	12	8	12	8	39.7	39.7	39.7	68.387	615	615;610	4.15				19			1		0	21.636	0.81272	0.98379	16.388	15	0	Median	0.74094	0.93375	16.495	8	0	Median	0.9094
Tb927.5.4420;Tb05.5K5.70	Tb927.5.4420;Tb05.5K5.70	24;24	24;24	24;24	>Tb927.5.4420 | organism=Trypanosoma_brucei_TREU927 | product=nucleolar RNA helicase II, putative,nucleolar RNA helicase Gu, putative | location=Tb927_05_v5.1:1366993-1368933(-) | length=632 | sequence_SO=chromosome | SO=protein_coding;>Tb05.5K5.70 | organ	0.96797	0.966651	0.96731	0.000989583	2	24	24	24	21	16	21	16	21	16	47.8	47.8	47.8	68.786	632	632;632	4.05				41		1			0	81.497	0.81337	1.0036	16.929	38	0	Median	0.76464	0.96797	19.7	23	0	Median	0.89681
Tb11.v5.0540;Tb927.4.4860;Tb927.4.4820;Tb927.4.4840	Tb11.v5.0540;Tb927.4.4860;Tb927.4.4820;Tb927.4.4840	5;4;4;3	5;4;4;3	5;4;4;3	>Tb11.v5.0540 | organism=Trypanosoma_brucei_TREU927 | product=amino acid transporter 8, putative | location=Tb927_11_bin_v5.1:2354708-2356180(-) | length=490 | sequence_SO=random_sequence | SO=protein_coding;>Tb927.4.4860 | organism=Trypanosoma_brucei_TREU	0.9547	0.980008	0.967354	0.0189809	4	5	5	5	3	5	3	5	3	5	16.7	16.7	16.7	52.651	490	490;473;490;490	5.5	1					9			0	39.814	0.80586	0.957	10.147	9	0	Median	0.73079	0.9547	5.6431	4	0	Median	0.92048
Tb927.6.1090	Tb927.6.1090	18	17	17	>Tb927.6.1090 | organism=Trypanosoma_brucei_TREU927 | product=proteasome regulatory ATPase subunit 3 (RPT3) | location=Tb927_06_v5.1:430187-431398(-) | length=403 | sequence_SO=chromosome | SO=protein_coding	0.95919	0.9758	0.967495	0.0124576	1	18	17	17	15	13	14	12	14	12	63.5	60.5	60.5	44.859	403	403	5.88					13	16	1	4	0	94.004	0.7964	0.97604	11.642	30	0	Median	0.76544	0.95919	11.691	18	0	Median	0.88206
Tb927.4.760	Tb927.4.760	27	27	27	>Tb927.4.760 | organism=Trypanosoma_brucei_TREU927 | product=gamma-adaptin 1, putative,AP-1 adapter complex gamma subunit, putative | location=Tb927_04_v5.1:208118-210523(-) | length=801 | sequence_SO=chromosome | SO=protein_coding	0.98535	0.949758	0.967554	0.0266941	1	27	27	27	27	23	27	23	27	23	46.9	46.9	46.9	87.344	801	801	4.35		2	16	52	2	2		11	0	140.95	0.83239	1.0294	14.82	72	0	Median	0.77949	0.98535	16.186	41	0	Median	0.90937
Tb927.2.2440	Tb927.2.2440	17	17	17	>Tb927.2.2440 | organism=Trypanosoma_brucei_TREU927 | product=proteasome regulatory non-ATPase subunit 6 (RPN6) | location=Tb927_02_v5.1:480837-482378(-) | length=513 | sequence_SO=chromosome | SO=protein_coding	0.94127	0.993937	0.967603	0.0395002	1	17	17	17	14	13	14	13	14	13	46.8	46.8	46.8	57.323	513	513	4.76				12	23	1	1		0	120.49	0.79889	0.97799	13.274	35	0	Median	0.74824	0.94127	14.976	16	0	Median	0.89733
Tb927.8.4330	Tb927.8.4330	12	12	12	>Tb927.8.4330 | organism=Trypanosoma_brucei_TREU927 | product=small GTP-binding protein Rab11 (RAB11) | location=Tb927_08_v5.1:1285929-1286579(-) | length=216 | sequence_SO=chromosome | SO=protein_coding	0.94043	0.994827	0.967628	0.0407977	1	12	12	12	11	9	11	9	11	9	57.4	57.4	57.4	23.527	216	216	7							27		0	112.84	0.74468	0.94679	8.4483	26	0	Median	0.73573	0.94043	6.1152	14	0	Median	0.82825
Tb927.11.14300	Tb927.11.14300	29	29	29	>Tb927.11.14300 | organism=Trypanosoma_brucei_TREU927 | product=dynein intermediate chain IC70, putative | location=Tb927_11_v5.1:3803683-3805491(+) | length=602 | sequence_SO=chromosome | SO=protein_coding	0.99582	0.939585	0.967702	0.0421765	1	29	29	29	26	17	26	17	26	17	57	57	57	68.115	602	602	4.12				52	3			1	0	120.47	0.84074	1.0296	11.964	49	0	Median	0.77954	0.99582	12.078	28	0	Median	0.88547
Tb927.4.100	Tb927.4.100	26	4	1	>Tb927.4.100 | organism=Trypanosoma_brucei_TREU927 | product=retrotransposon hot spot protein (RHS, pseudogene), putative,retrotransposon hot spot protein 1 (RHS1), interrupted | location=Tb927_04_v5.1:1682-3133(-) | length=483 | sequence_SO=chromosome | S	0.97572	0.959785	0.967753	0.0119512	1	26	4	1	25	21	4	4	1	1	65.2	8.5	2.1	55.106	483	483	3			8						0	21.685	0.793	1.0012	7.5146	8	0	Median	0.7686	0.97572	4.1515	4	0	Median	0.86232
Tb927.6.2060	Tb927.6.2060	10	10	10	>Tb927.6.2060 | organism=Trypanosoma_brucei_TREU927 | product=histidyl-tRNA synthetase | location=Tb927_06_v5.1:670558-672794(-) | length=477 | sequence_SO=chromosome | SO=protein_coding	0.99542	0.941176	0.968298	0.0406826	1	10	10	10	6	6	6	6	6	6	33.8	33.8	33.8	53.345	477	477	5					12				0	17.557	0.89995	1.0544	26.304	10	0	Median	0.77666	0.99542	9.1144	5	0	Median	0.93225
Tb927.11.2360	Tb927.11.2360	29	29	29	>Tb927.11.2360 | organism=Trypanosoma_brucei_TREU927 | product=phenylalanyl-tRNA synthetase (beta subunit), putative | location=Tb927_11_v5.1:676961-678835(+) | length=624 | sequence_SO=chromosome | SO=protein_coding	0.96725	0.969368	0.968309	0.00158848	1	29	29	29	23	23	23	23	23	23	61.4	61.4	61.4	70.311	624	624	4				49					0	56.555	0.82129	0.99721	13.374	45	0	Median	0.76069	0.96725	11.781	24	0	Median	0.88423
Tb927.10.7500	Tb927.10.7500	14	14	14	>Tb927.10.7500 | organism=Trypanosoma_brucei_TREU927 | product=fibrillarin (NOP1) | location=Tb927_10_v5.1:1884555-1885457(-) | length=300 | sequence_SO=chromosome | SO=protein_coding	0.97429	0.962464	0.968377	0.00886957	1	14	14	14	13	11	13	11	13	11	57.3	57.3	57.3	31.643	300	300	6.12						29	2	1	0	73.365	0.80175	0.97502	18.097	32	0	Median	0.7517	0.97429	19.733	19	0	Median	0.9088
Tb927.11.14090	Tb927.11.14090	15	15	15	>Tb927.11.14090 | organism=Trypanosoma_brucei_TREU927 | product=hypothetical protein, conserved | location=Tb927_11_v5.1:3731214-3732656(+) | length=480 | sequence_SO=chromosome | SO=protein_coding	0.94783	0.989022	0.968426	0.0308939	1	15	15	15	14	12	14	12	14	12	39	39	39	51.674	480	480	6.84					6	12	17	16	0	85.714	0.80164	0.98523	23.63	46	0	Median	0.76066	0.94783	28.068	28	0	Median	0.91158
Tb927.10.4260	Tb927.10.4260	2	2	2	>Tb927.10.4260 | organism=Trypanosoma_brucei_TREU927 | product=hypothetical protein, conserved | location=Tb927_10_v5.1:1113513-1114925(+) | length=470 | sequence_SO=chromosome | SO=protein_coding	0.96093	0.975991	0.96846	0.0112955	1	2	2	2	2	2	2	2	2	2	6.4	6.4	6.4	52.328	470	470	6						4			0	3.4593	0.88523	1.0246	7.9173	4	0	Median	0.72565	0.96093	12.027	2	0	Median	0.93768
Tb927.10.2560	Tb927.10.2560	8	8	8	>Tb927.10.2560 | organism=Trypanosoma_brucei_TREU927 | product=mitochondrial malate dehydrogenase (mMDH) | location=Tb927_10_v5.1:663281-664237(+) | length=318 | sequence_SO=chromosome | SO=protein_coding	1.0398	0.897183	0.968491	0.106963	1	8	8	8	7	6	7	6	7	6	43.4	43.4	43.4	33.188	318	318	6						16			0	71.525	0.86578	1.0842	13.597	11	0	Median	0.79783	1.0398	15.626	7	0	Median	1.0145
Tb927.11.6530	Tb927.11.6530	6	6	6	>Tb927.11.6530 | organism=Trypanosoma_brucei_TREU927 | product=hypothetical protein, conserved | location=Tb927_11_v5.1:1836373-1837620(-) | length=415 | sequence_SO=chromosome | SO=protein_coding	1.0146	0.922424	0.968512	0.0691319	1	6	6	6	4	4	4	4	4	4	21.7	21.7	21.7	45.865	415	415	5.09					10	1			0	19.202	0.88114	1.0488	15.469	8	0	Median	0.81511	1.0146	14.45	5	0	Median	0.95732
Tb927.10.5140	Tb927.10.5140	12	12	12	>Tb927.10.5140 | organism=Trypanosoma_brucei_TREU927 | product=protein kinase, putative,mitogen-activated protein kinase 2, putative | location=Tb927_10_v5.1:1261399-1262727(+) | length=442 | sequence_SO=chromosome | SO=protein_coding	0.95423	0.982994	0.968612	0.0215732	1	12	12	12	9	10	9	10	9	10	42.1	42.1	42.1	49.74	442	442	5.55					19	11	2	1	0	44.025	0.80321	0.99452	16.932	24	0	Median	0.75325	0.95423	15.82	12	0	Median	0.90644
Tb927.9.15070	Tb927.9.15070	21	21	21	>Tb927.9.15070 | organism=Trypanosoma_brucei_TREU927 | product=hypothetical protein, conserved | location=Tb927_09_v5.1:2352212-2354425(+) | length=737 | sequence_SO=chromosome | SO=protein_coding	0.9665	0.97078	0.96864	0.00320965	1	21	21	21	18	20	18	20	18	20	41.5	41.5	41.5	82.306	737	737	3.93			3	41					0	56.426	0.80984	1.001	16.311	40	0	Median	0.776	0.9665	18.992	20	0	Median	0.93137
Tb927.1.3390	Tb927.1.3390	5	5	5	>Tb927.1.3390 | organism=Trypanosoma_brucei_TREU927 | product=hypothetical protein, conserved | location=Tb927_01_v5.1:732009-732497(-) | length=162 | sequence_SO=chromosome | SO=protein_coding	1.0524	0.885034	0.968717	0.125524	1	5	5	5	5	3	5	3	5	3	44.4	44.4	44.4	17.88	162	162	7.2							8	2	0	59.066	0.87897	1.1258	10.562	7	0	Median	0.83821	1.0524	6.753	4	0	Median	0.99942
Tb927.9.5220	Tb927.9.5220	4	4	4	>Tb927.9.5220 | organism=Trypanosoma_brucei_TREU927 | product=hypothetical protein, conserved | location=Tb927_09_v5.1:920669-920998(+) | length=109 | sequence_SO=chromosome | SO=protein_coding	1.0299	0.907606	0.968753	0.0917207	1	4	4	4	4	2	4	2	4	2	51.4	51.4	51.4	12.201	109	109	8								6	0	17.073	0.8567	1.0492	13.811	6	0	Median	0.81633	1.0299	17.189	4	0	Median	0.94755
Tb927.7.4290	Tb927.7.4290	16	16	16	>Tb927.7.4290 | organism=Trypanosoma_brucei_TREU927 | product=hypothetical protein, conserved | location=Tb927_07_v5.1:1138432-1139325(-) | length=297 | sequence_SO=chromosome | SO=protein_coding	0.9559	0.981643	0.968772	0.0193075	1	16	16	16	12	14	12	14	12	14	44.8	44.8	44.8	33.703	297	297	6.36						28	13	1	0	111.79	0.80979	0.98945	14.3	37	0	Median	0.75166	0.9559	16.614	18	0	Median	0.88614
Tb927.6.1290	Tb927.6.1290	8	8	8	>Tb927.6.1290 | organism=Trypanosoma_brucei_TREU927 | product=hypothetical protein, conserved | location=Tb927_06_v5.1:472888-475587(-) | length=899 | sequence_SO=chromosome | SO=protein_coding	0.98519	0.952562	0.968876	0.0244707	1	8	8	8	5	8	5	8	5	8	12.8	12.8	12.8	100.58	899	899	3			14						0	31.692	0.87308	1.0443	13.213	11	0	Median	0.774	0.98519	8.384	4	0	Median	0.91137
Tb927.2.1810	Tb927.2.1810	38	38	38	>Tb927.2.1810 | organism=Trypanosoma_brucei_TREU927 | product=transcription silencer (ISWI) | location=Tb927_02_v5.1:335476-338958(+) | length=1160 | sequence_SO=chromosome | SO=protein_coding	0.96767	0.970309	0.968989	0.00197892	1	38	38	38	34	23	34	23	34	23	39.8	39.8	39.8	132.76	1160	1160	2.02		59	1						0	187.99	0.78904	0.98668	13.946	46	0	Median	0.75674	0.96767	15.978	29	0	Median	0.90009
Tb927.11.13270	Tb927.11.13270	5	5	5	>Tb927.11.13270 | organism=Trypanosoma_brucei_TREU927 | product=hypothetical protein, conserved | location=Tb927_11_v5.1:3559065-3559877(-) | length=270 | sequence_SO=chromosome | SO=protein_coding	0.96532	0.972668	0.968994	0.00551102	1	5	5	5	5	3	5	3	5	3	24.8	24.8	24.8	30.104	270	270	6.9						3	5	2	0	18.484	0.76072	0.96532	13.843	9	0	Median	0.75902	0.96532	11.332	7	0	Median	0.91796
Tb927.10.1990;Tb11.v5.0641	Tb927.10.1990	34;12	34;12	34;12	>Tb927.10.1990 | organism=Trypanosoma_brucei_TREU927 | product=major vault protein, putative (MVP) | location=Tb927_10_v5.1:521750-524341(+) | length=863 | sequence_SO=chromosome | SO=protein_coding	0.926	1.01214	0.969068	0.0646016	2	34	34	34	24	28	24	28	24	28	54.5	54.5	54.5	95.062	863	863;408	3.02			54	1					0	207.41	0.81606	0.97224	11.745	48	0	Median	0.73656	0.926	11.518	21	0	Median	0.85563
Tb927.6.2200	Tb927.6.2200	13	13	13	>Tb927.6.2200 | organism=Trypanosoma_brucei_TREU927 | product=hypothetical protein, conserved | location=Tb927_06_v5.1:698549-699142(+) | length=197 | sequence_SO=chromosome | SO=protein_coding	0.98182	0.95648	0.96915	0.0190049	1	13	13	13	7	10	7	10	7	10	74.1	74.1	74.1	21.126	197	197	7.08							23	2	0	90.732	0.80888	1.0035	16.255	25	0	Median	0.76714	0.98182	12.709	10	0	Median	0.93024
Tb927.2.560	Tb927.2.560	41	14	8	>Tb927.2.560 | organism=Trypanosoma_brucei_TREU927 | product=retrotransposon hot spot protein 4 (RHS4), putative | location=Tb927_02_v5.1:108732-111269(-) | length=845 | sequence_SO=chromosome | SO=protein_coding	0.91807	1.02042	0.969244	0.0767614	1	41	14	8	29	34	8	13	4	7	45.1	18.8	9.9	95.911	845	845	3.06		4	26	2			1		0	101.25	0.78315	0.92919	14.362	29	0	Median	0.71213	0.91807	15.075	13	0	Median	0.85524
Tb927.7.4390	Tb927.7.4390	8	8	8	>Tb927.7.4390 | organism=Trypanosoma_brucei_TREU927 | product=threonine synthase, putative | location=Tb927_07_v5.1:1163839-1165866(-) | length=675 | sequence_SO=chromosome | SO=protein_coding	0.96772	0.971062	0.969391	0.00250676	1	8	8	8	7	3	7	3	7	3	19.9	19.9	19.9	73.873	675	675	4				10					0	17.466	0.77703	0.98066	13.867	9	0	Median	0.7594	0.96772	14.106	6	0	Median	0.94326
Tb927.1.2570	Tb927.1.2570	34	34	34	>Tb927.1.2570 | organism=Trypanosoma_brucei_TREU927 | product=coatomer beta subunit (beta-coP) | location=Tb927_01_v5.1:603482-606430(+) | length=982 | sequence_SO=chromosome | SO=protein_coding	0.96281	0.975991	0.9694	0.00988547	1	34	34	34	27	32	27	32	27	32	44.9	44.9	44.9	110.05	982	982	3.6			61	9	11	2		3	0	314.67	0.83624	0.98737	20.211	74	0	Median	0.77409	0.96281	25.927	36	0	Median	0.90849
Tb927.10.2620	Tb927.10.2620	8	8	8	>Tb927.10.2620 | organism=Trypanosoma_brucei_TREU927 | product=hypothetical protein, conserved | location=Tb927_10_v5.1:678065-678643(+) | length=192 | sequence_SO=chromosome | SO=protein_coding	0.90793	1.03097	0.96945	0.0922803	1	8	8	8	8	7	8	7	8	7	25.5	25.5	25.5	21.809	192	192	7.26							17	6	0	56.571	0.75289	0.92674	37.527	22	0	Median	0.71165	0.90793	43.712	16	0	Median	0.82381
Tb927.10.290	Tb927.10.290	14	14	14	>Tb927.10.290 | organism=Trypanosoma_brucei_TREU927 | product=proteasome alpha 2 subunit, putative | location=Tb927_10_v5.1:84898-85593(+) | length=231 | sequence_SO=chromosome | SO=protein_coding	1.0003	0.938791	0.969545	0.0461319	1	14	14	14	14	12	14	12	14	12	77.5	77.5	77.5	25.354	231	231	6.97						1	37		0	144.96	0.82335	1.0166	9.8717	31	0	Median	0.78884	1.0003	5.329	17	0	Median	0.88787
Tb927.10.3030;Tb927.10.2980	Tb927.10.3030;Tb927.10.2980	10;10	10;10	10;10	>Tb927.10.3030 | organism=Trypanosoma_brucei_TREU927 | product=proteasome regulatory non-ATPase subunit 11,19S proteasome regulatory subunit, Metallo-peptidase, Clan MP, Family M67 (RPN11) | location=Tb927_10_v5.1:794511-795428(+) | length=305 | sequence_S	0.97469	0.964692	0.969691	0.0074983	2	10	10	10	9	9	9	9	9	9	44.9	44.9	44.9	33.847	305	305;305	6.33						19	2	3	0	66.879	0.79131	0.99127	15.814	20	0	Median	0.77147	0.97469	9.9714	11	0	Median	0.94085
Tb927.3.3410;Tb11.v5.0768	Tb927.3.3410;Tb11.v5.0768	15;9	15;9	15;9	>Tb927.3.3410 | organism=Trypanosoma_brucei_TREU927 | product=aspartyl aminopeptidase, putative,metallo-peptidase, Clan MH, Family M20 | location=Tb927_03_v5.1:871008-874159(-) | length=451 | sequence_SO=chromosome | SO=protein_coding;>Tb11.v5.0768 | organ	0.96008	0.979816	0.969948	0.0148018	2	15	15	15	12	11	12	11	12	11	51.4	51.4	51.4	49.327	451	451;297	5					29				0	55.761	0.80405	0.98699	17.819	26	0	Median	0.75334	0.96008	15.203	13	0	Median	0.92097
Tb927.8.4610	Tb927.8.4610	6	5	5	>Tb927.8.4610 | organism=Trypanosoma_brucei_TREU927 | product=small GTP-binding protein Rab1 (Trab1) | location=Tb927_08_v5.1:1362137-1362793(-) | length=218 | sequence_SO=chromosome | SO=protein_coding	0.99832	0.94162	0.96997	0.0425253	1	6	5	5	6	4	5	3	5	3	32.6	27.5	27.5	24.018	218	218	7							8		0	22.795	0.80601	1.0214	10.876	8	0	Median	0.77369	0.99832	13.743	5	0	Median	0.92848
Tb927.5.2320	Tb927.5.2320	20	20	20	>Tb927.5.2320 | organism=Trypanosoma_brucei_TREU927 | product=hypothetical protein, conserved | location=Tb927_05_v5.1:781880-784171(+) | length=736 | sequence_SO=chromosome | SO=protein_coding	0.92033	1.01976	0.970047	0.0745748	1	20	20	20	12	18	12	18	12	18	33.4	33.4	33.4	82.159	736	736	3.89			4	32					0	36.997	0.7964	0.95353	16.543	32	0	Median	0.7336	0.92033	20.417	16	0	Median	0.87079
Tb927.4.3380	Tb927.4.3380	28	28	28	>Tb927.4.3380 | organism=Trypanosoma_brucei_TREU927 | product=myosin IB heavy chain, putative | location=Tb927_04_v5.1:879793-883296(-) | length=1167 | sequence_SO=chromosome | SO=protein_coding	0.94383	0.996413	0.970121	0.0394372	1	28	28	28	26	12	26	12	26	12	34.9	34.9	34.9	131.76	1167	1167	2		44							0	108.94	0.78553	0.95202	14.039	38	0	Median	0.7594	0.94383	14.934	28	0	Median	0.88798
Tb927.3.2870	Tb927.3.2870	2	2	2	>Tb927.3.2870 | organism=Trypanosoma_brucei_TREU927 | product=hypothetical protein, conserved | location=Tb927_03_v5.1:739992-741956(-) | length=654 | sequence_SO=chromosome | SO=protein_coding	0.99026	0.950209	0.970235	0.0300382	1	2	2	2	1	2	1	2	1	2	3.5	3.5	3.5	72.901	654	654	3.75			1	3					0	3.7298	0.85617	0.99455	6.761	4	0	Median	0.79613	0.99026	2.3361	2	0	Median	0.95966
Tb927.10.13450	Tb927.10.13450	9	9	9	>Tb927.10.13450 | organism=Trypanosoma_brucei_TREU927 | product=hypothetical protein, conserved,hypothetical protein | location=Tb927_10_v5.1:3281746-3283548(-) | length=600 | sequence_SO=chromosome | SO=protein_coding	1.006	0.934492	0.970246	0.0536309	1	9	9	9	8	6	8	6	8	6	21.5	21.5	21.5	67.206	600	600	4				14					0	19.096	0.88846	1.0232	14.572	14	0	Median	0.8079	1.006	18.257	8	0	Median	0.96325
Tb927.8.1210	Tb927.8.1210	11	11	11	>Tb927.8.1210 | organism=Trypanosoma_brucei_TREU927 | product=hypothetical protein, conserved | location=Tb927_08_v5.1:385963-388023(-) | length=686 | sequence_SO=chromosome | SO=protein_coding	0.98219	0.958313	0.970252	0.0179075	1	11	11	11	11	6	11	6	11	6	51.9	51.9	51.9	77.786	686	686	1.79	19	12	5	3					0	57.003	0.80595	0.99662	11.047	33	0	Median	0.77465	0.98219	13.8	18	0	Median	0.85426
Tb927.7.6090	Tb927.7.6090	42	42	42	>Tb927.7.6090 | organism=Trypanosoma_brucei_TREU927 | product=hypothetical protein, conserved | location=Tb927_07_v5.1:1659147-1662227(-) | length=762 | sequence_SO=chromosome | SO=protein_coding	0.93002	1.01074	0.970382	0.0605432	1	42	42	42	39	33	39	33	39	33	52.8	52.8	52.8	88.162	762	762	3.44			85	7	5	5	1	2	0	201.98	0.79376	0.9629	15.649	92	0	Median	0.73089	0.93002	13.617	50	0	Median	0.87856
Tb927.11.6330	Tb927.11.6330	10	10	10	>Tb927.11.6330 | organism=Trypanosoma_brucei_TREU927 | product=6-phosphogluconolactonase (6PGL) | location=Tb927_11_v5.1:1778348-1779148(-) | length=266 | sequence_SO=chromosome | SO=protein_coding	0.94308	0.998004	0.970542	0.041193	1	10	10	10	9	7	9	7	9	7	62.8	62.8	62.8	28.65	266	266	6.5						12	9	1	0	32.455	0.82591	0.9931	25.714	20	0	Median	0.73548	0.94308	28.814	13	0	Median	0.8715
Tb927.4.4660	Tb927.4.4660	7	7	7	>Tb927.4.4660 | organism=Trypanosoma_brucei_TREU927 | product=hypothetical protein, conserved | location=Tb927_04_v5.1:1280399-1282651(-) | length=181 | sequence_SO=chromosome | SO=protein_coding	0.96536	0.975895	0.970628	0.00790154	1	7	7	7	7	4	7	4	7	4	61.3	61.3	61.3	19.989	181	181	7							13		0	47.035	0.78048	0.997	16.743	11	0	Median	0.76154	0.96536	15.374	7	0	Median	0.88311
Tb927.10.2010	Tb927.10.2010	48	48	3	>Tb927.10.2010 | organism=Trypanosoma_brucei_TREU927 | product=hexokinase (HK1) | location=Tb927_10_v5.1:526772-528187(+) | length=471 | sequence_SO=chromosome | SO=protein_coding	1.0102	0.93188	0.97104	0.0587403	1	48	48	3	48	41	48	41	3	2	78.8	78.8	6.8	51.295	471	471	5.49	34	28	23	38	183	78	171	63	0	323.31	0.85488	1.0403	18.007	556	0	Median	0.80164	1.0102	11.125	299	0	Median	0.94608
Tb927.9.9550	Tb927.9.9550	16	16	16	>Tb927.9.9550 | organism=Trypanosoma_brucei_TREU927 | product=hypothetical protein, conserved | location=Tb927_09_v5.1:1520887-1521525(-) | length=212 | sequence_SO=chromosome | SO=protein_coding	0.92293	1.01925	0.971092	0.0722428	1	16	16	16	15	8	15	8	15	8	62.3	62.3	62.3	24.509	212	212	7.02						11	22	12	0	54.18	0.73286	0.93103	15.045	36	0	Median	0.72996	0.92293	10.627	23	0	Median	0.83767
Tb927.5.1430	Tb927.5.1430	8	3	3	>Tb927.5.1430 | organism=Trypanosoma_brucei_TREU927 | product=64 kDa invariant surface glycoprotein (ISG64) | location=Tb927_05_v5.1:511528-512832(-) | length=434 | sequence_SO=chromosome | SO=protein_coding	0.88389	1.05866	0.971275	0.131078	1	8	3	3	8	5	3	2	3	2	19.6	11.1	11.1	46.711	434	434	5.14					6	1			0	13.552	0.72917	0.90069	8.2458	7	0	Median	0.6762	0.88389	9.0013	5	0	Median	0.78606
Tb927.5.1360	Tb927.5.1360	12	12	12	>Tb927.5.1360 | organism=Trypanosoma_brucei_TREU927 | product=nucleoside 2-deoxyribosyltransferase (NDRT) | location=Tb927_05_v5.1:498441-498902(+) | length=153 | sequence_SO=chromosome | SO=protein_coding	0.97786	0.964878	0.971369	0.00973618	1	12	12	12	12	9	12	9	12	9	69.9	69.9	69.9	17.298	153	153	7.65							11	20	0	144.12	0.81228	0.98752	15.092	29	0	Median	0.77134	0.97786	17.485	16	0	Median	0.87471
Tb927.9.14100	Tb927.9.14100	6	6	6	>Tb927.9.14100 | organism=Trypanosoma_brucei_TREU927 | product=hypothetical protein, conserved | location=Tb927_09_v5.1:2201540-2202484(-) | length=314 | sequence_SO=chromosome | SO=protein_coding	0.93595	1.00732	0.971637	0.0535299	1	6	6	6	5	4	5	4	5	4	26.8	26.8	26.8	34.916	314	314	6						9			0	32.909	0.77636	0.93595	16.82	9	0	Median	0.7477	0.93595	3.5968	5	0	Median	0.87589
Tb927.11.5230	Tb927.11.5230	7	7	7	>Tb927.11.5230 | organism=Trypanosoma_brucei_TREU927 | product=hypothetical protein, conserved | location=Tb927_11_v5.1:1491304-1492011(+) | length=235 | sequence_SO=chromosome | SO=protein_coding	0.99224	0.951113	0.971676	0.0308454	1	7	7	7	7	4	7	4	7	4	44.7	44.7	44.7	25.968	235	235	7.07						4	6	5	0	12.295	0.81214	0.99224	9.0656	14	0	Median	0.78278	0.99224	7.5349	10	0	Median	0.90329
Tb927.10.3200	Tb927.10.3200	10	10	10	>Tb927.10.3200 | organism=Trypanosoma_brucei_TREU927 | product=U2 splicing auxiliary factor, putative (U2AF35) | location=Tb927_10_v5.1:829453-830196(+) | length=247 | sequence_SO=chromosome | SO=protein_coding	0.97434	0.969274	0.971807	0.00379949	1	10	10	10	8	8	8	8	8	8	49	49	49	29.114	247	247	6.46						14	12		0	56.594	0.77466	0.98436	12.573	23	0	Median	0.77221	0.97434	9.0456	13	0	Median	0.89889
Tb927.2.4520	Tb927.2.4520	17	17	17	>Tb927.2.4520 | organism=Trypanosoma_brucei_TREU927 | product=hypothetical protein, conserved | location=Tb927_02_v5.1:800711-804475(-) | length=1254 | sequence_SO=chromosome | SO=protein_coding	0.98234	0.961354	0.971847	0.0157398	1	17	17	17	15	8	15	8	15	8	18.7	18.7	18.7	143.93	1254	1254	2.64		22	2	2				2	0	58.334	0.79973	0.99388	25.608	24	0	Median	0.7844	0.98234	28.458	16	0	Median	0.92236
Tb927.10.8040	Tb927.10.8040	30	30	30	>Tb927.10.8040 | organism=Trypanosoma_brucei_TREU927 | product=adaptin complex 1 subunit, putative,beta-adaptin, fragment (BAD1) | location=Tb927_10_v5.1:2002267-2004354(-) | length=695 | sequence_SO=chromosome | SO=protein_coding	0.9931	0.950661	0.97188	0.0318295	1	30	30	30	26	28	26	28	26	28	56.8	56.8	56.8	76.279	695	695	3.97			2	69					0	151.14	0.83819	1.0372	35.852	67	0	Median	0.78206	0.9931	46.252	34	0	Median	0.90387
Tb927.10.7280	Tb927.10.7280	9	9	8	>Tb927.10.7280 | organism=Trypanosoma_brucei_TREU927 | product=pre-mRNA splicing factor ATP-dependent RNA helicase, putative,RNA helicase, putative | location=Tb927_10_v5.1:1833351-1836539(-) | length=1062 | sequence_SO=chromosome | SO=protein_coding	1.0588	0.885034	0.971917	0.130324	1	9	9	8	8	3	8	3	8	2	10.4	10.4	9.2	121.24	1062	1062	2.18		10		1					0	10.794	0.87556	1.0749	16.348	11	0	Median	0.84982	1.0588	7.0841	8	0	Median	1.0115
Tb927.2.100;Tb927.2.1344	Tb927.2.100	55;1	55;1	11;0	>Tb927.2.100 | organism=Trypanosoma_brucei_TREU927 | product=retrotransposon hot spot protein 1 (RHS1), putative | location=Tb927_02_v5.1:1683-4172(-) | length=829 | sequence_SO=chromosome | SO=protein_coding	0.99705	0.947149	0.9721	0.0374257	2	55	55	11	47	46	47	46	9	9	77.2	77.2	18.9	94.932	829	829;71	3.1	1	6	118	21	1				0	323.31	0.85217	1.0211	11.631	131	0	Median	0.78694	0.99705	10.803	64	0	Median	0.89571
Tb927.8.4910	Tb927.8.4910	2	2	2	>Tb927.8.4910 | organism=Trypanosoma_brucei_TREU927 | product=hypothetical protein, conserved | location=Tb927_08_v5.1:1455685-1456029(+) | length=114 | sequence_SO=chromosome | SO=protein_coding	0.96283	0.981643	0.972237	0.01411	1	2	2	2	2	1	2	1	2	1	32.5	32.5	32.5	13.123	114	114	8								5	0	17.071	0.80826	0.96283	13.967	5	0	Median	0.76891	0.96283	15.923	3	0	Median	0.90814
Tb927.3.3900	Tb927.3.3900	23	23	23	>Tb927.3.3900 | organism=Trypanosoma_brucei_TREU927 | product=carnitine O-palmitoyltransferase II, putative (CPT II) | location=Tb927_03_v5.1:1084019-1085884(+) | length=621 | sequence_SO=chromosome | SO=protein_coding	1.0049	0.939673	0.972286	0.0489203	1	23	23	23	19	18	19	18	19	18	51.5	51.5	51.5	67.395	621	621	4				41					0	57.473	0.83352	1.0178	12.059	40	0	Median	0.79006	1.0049	12.878	20	0	Median	0.90672
Tb927.7.4910;Tb11.v5.0172	Tb927.7.4910;Tb11.v5.0172	11;11	11;11	11;11	>Tb927.7.4910 | organism=Trypanosoma_brucei_TREU927 | product=hypothetical protein, conserved | location=Tb927_07_v5.1:1294355-1295464(-) | length=369 | sequence_SO=chromosome | SO=protein_coding;>Tb11.v5.0172 | organism=Trypanosoma_brucei_TREU927 | produc	0.98554	0.959417	0.972478	0.0195925	2	11	11	11	11	5	11	5	11	5	38.8	38.8	38.8	40.483	369	369;369	5.83					11	8	1	3	0	38.895	0.82089	1.004	13.024	21	0	Median	0.78607	0.98554	12.722	15	0	Median	0.95061
Tb927.2.4210	Tb927.2.4210	38	38	38	>Tb927.2.4210 | organism=Trypanosoma_brucei_TREU927 | product=glycosomal phosphoenolpyruvate carboxykinase (PEPCK) | location=Tb927_02_v5.1:740813-742390(-) | length=525 | sequence_SO=chromosome | SO=protein_coding	0.97347	0.971534	0.972502	0.00145196	1	38	38	38	33	29	33	29	33	29	75.4	75.4	75.4	58.564	525	525	5.06	14	1	1	18	76	26	13	12	0	323.31	0.81788	0.99369	13.696	146	0	Median	0.7736	0.97347	13.339	88	0	Median	0.89543
Tb927.10.2570;Tb11.v5.0498	Tb927.10.2570;Tb11.v5.0498	5;3	5;3	5;3	>Tb927.10.2570 | organism=Trypanosoma_brucei_TREU927 | product=lysosomal alpha-mannosidase precursor, putative | location=Tb927_10_v5.1:664909-667902(+) | length=997 | sequence_SO=chromosome | SO=protein_coding;>Tb11.v5.0498 | organism=Trypanosoma_brucei_T	1.0329	0.912242	0.972571	0.0904933	2	5	5	5	5	4	5	4	5	4	10.5	10.5	10.5	111.75	997	997;708	4				10					0	11.203	0.84963	1.0613	7.697	8	0	Median	0.81857	1.0329	6.7679	5	0	Median	0.96763
Tb927.11.670;Tb11.0890	Tb927.11.670;Tb11.0890	7;6	7;6	7;6	>Tb927.11.670 | organism=Trypanosoma_brucei_TREU927 | product=epsinR | location=Tb927_11_v5.1:163804-165321(-) | length=505 | sequence_SO=chromosome | SO=protein_coding;>Tb11.0890 | organism=Trypanosoma_brucei_TREU927 | product=epsin, putative,chrXI additi	0.99692	0.948587	0.972753	0.03625	2	7	7	7	7	5	7	5	7	5	15.2	15.2	15.2	55.266	505	505;493	7.16				2			13	10	0	33.256	0.83881	1.0213	11.907	24	0	Median	0.78238	0.99692	10.771	13	0	Median	0.94328
Tb927.4.2540	Tb927.4.2540	1	1	1	>Tb927.4.2540 | organism=Trypanosoma_brucei_TREU927 | product=ubiquitin, putative | location=Tb927_04_v5.1:670241-670477(+) | length=78 | sequence_SO=chromosome | SO=protein_coding	0.95782	0.987752	0.972786	0.0224489	1	1	1	1	1	1	1	1	1	1	21.8	21.8	21.8	8.668	78	78	5.5			2					2	0	60.897	0.80487	1.0018	10.847	4	0	Median	0.74478	0.95782	14.891	2	0	Median	0.84589
Tb927.6.740	Tb927.6.740	17	17	17	>Tb927.6.740 | organism=Trypanosoma_brucei_TREU927 | product=ATP-dependent DEAH-box RNA helicase, putative | location=Tb927_06_v5.1:301628-305383(-) | length=1251 | sequence_SO=chromosome | SO=protein_coding	1.0105	0.935104	0.972802	0.0565472	1	17	17	17	15	5	15	5	15	5	16.5	16.5	16.5	139.08	1251	1251	2		21							0	37.602	0.83832	1.0233	19.459	16	0	Median	0.81737	1.0105	19.398	12	0	Median	0.91493
Tb927.5.1230;Tb11.v5.0639	Tb927.5.1230;Tb11.v5.0639	10;10	10;10	10;10	>Tb927.5.1230 | organism=Trypanosoma_brucei_TREU927 | product=hypothetical protein, conserved | location=Tb927_05_v5.1:465845-467296(+) | length=483 | sequence_SO=chromosome | SO=protein_coding;>Tb11.v5.0639 | organism=Trypanosoma_brucei_TREU927 | product=	0.91888	1.02677	0.972824	0.0809159	2	10	10	10	6	9	6	9	6	9	21.1	21.1	21.1	58.564	483	483;483	4.11				16	2				0	26.468	0.79934	0.94068	23.399	17	0	Median	0.73563	0.91888	14.124	8	0	Median	0.87189
Tb927.9.10690	Tb927.9.10690	4	4	4	>Tb927.9.10690 | organism=Trypanosoma_brucei_TREU927 | product=hypothetical protein, conserved | location=Tb927_09_v5.1:1693091-1694557(-) | length=488 | sequence_SO=chromosome | SO=protein_coding	0.97358	0.972101	0.97284	0.00110947	1	4	4	4	3	2	3	2	3	2	10	10	10	55.64	488	488	5					5				0	6.5939	0.84677	1.008	8.41	4	0	Median	0.76355	0.97358	10.495	2	0	Median	0.91401
Tb927.9.14480	Tb927.9.14480	5	5	5	>Tb927.9.14480 | organism=Trypanosoma_brucei_TREU927 | product=dynein-associated protein, putative | location=Tb927_09_v5.1:2261326-2262337(-) | length=98 | sequence_SO=chromosome | SO=protein_coding	0.98274	0.963113	0.972926	0.0147204	1	5	5	5	5	4	5	4	5	4	75.5	75.5	75.5	11.13	98	98	8								10	0	37.451	0.81093	1.0145	8.6748	10	0	Median	0.77795	0.98274	9.9938	6	0	Median	0.89633
Tb927.6.3290	Tb927.6.3290	8	8	8	>Tb927.6.3290 | organism=Trypanosoma_brucei_TREU927 | product=intraflagellar transport protein 20, putative (IFT20) | location=Tb927_06_v5.1:972730-973122(+) | length=130 | sequence_SO=chromosome | SO=protein_coding	0.98043	0.965437	0.972934	0.0112445	1	8	8	8	7	5	7	5	7	5	68.5	68.5	68.5	15.419	130	130	8								16	0	39.597	0.81906	1.0017	18.238	15	0	Median	0.7682	0.98043	13.673	8	0	Median	0.86597
Tb927.7.3940	Tb927.7.3940	8	8	8	>Tb927.7.3940 | organism=Trypanosoma_brucei_TREU927 | product=mitochondrial carrier protein,adenine nucleotide mitochondrial translocator, putative (MCP16) | location=Tb927_07_v5.1:1032471-1033466(+) | length=331 | sequence_SO=chromosome | SO=protein_codin	0.983	0.963298	0.973149	0.0147762	1	8	8	8	5	5	5	5	5	5	30.2	30.2	30.2	36.34	331	331	6						10			0	45.279	0.81098	0.98636	12.669	9	0	Median	0.76718	0.983	12.856	5	0	Median	0.94087
Tb927.7.2100	Tb927.7.2100	27	27	27	>Tb927.7.2100 | organism=Trypanosoma_brucei_TREU927 | product=GMP synthase, putative,glutamine amidotransferase, putative | location=Tb927_07_v5.1:531728-534465(-) | length=658 | sequence_SO=chromosome | SO=protein_coding	0.93877	1.00833	0.973549	0.0521691	1	27	27	27	20	25	20	25	20	25	59.1	59.1	59.1	71.794	658	658	4				51					0	70.306	0.80009	0.96133	14.761	50	0	Median	0.7505	0.93877	14.338	23	0	Median	0.84446
Tb927.11.9780	Tb927.11.9780	7	7	7	>Tb927.11.9780 | organism=Trypanosoma_brucei_TREU927 | product=conserved protein | location=Tb927_11_v5.1:2643639-2646872(-) | length=1077 | sequence_SO=chromosome | SO=protein_coding	0.97047	0.976753	0.973612	0.00471245	1	7	7	7	5	4	5	4	5	4	10.1	10.1	10.1	118.85	1077	1077	2.91		1	10						0	69.213	0.81227	0.97217	9.6899	10	0	Median	0.75902	0.97047	6.3119	6	0	Median	0.8909
Tb927.3.3100	Tb927.3.3100	3	3	3	>Tb927.3.3100 | organism=Trypanosoma_brucei_TREU927 | product=peptidyl-prolyl cis-trans isomerase NIMA-interacting 4, putative | location=Tb927_03_v5.1:795604-796019(-) | length=122 | sequence_SO=chromosome | SO=protein_coding	0.94223	1.00517	0.973698	0.0472024	1	3	3	3	3	3	3	3	3	3	23.8	23.8	23.8	13.077	122	122	8								6	0	7.7434	0.77027	0.95961	10.418	6	0	Median	0.75357	0.94223	11.55	3	0	Median	0.89872
Tb927.2.5820	Tb927.2.5820	11	11	11	>Tb927.2.5820 | organism=Trypanosoma_brucei_TREU927 | product=hypothetical protein, conserved | location=Tb927_02_v5.1:1053845-1057090(+) | length=1081 | sequence_SO=chromosome | SO=protein_coding	1.0093	0.938174	0.973737	0.0533443	1	11	11	11	8	9	8	9	8	9	14.1	14.1	14.1	117.49	1081	1081	2.65		8	15						0	72.306	0.87946	1.0356	18.059	20	0	Median	0.81382	1.0093	20.335	8	0	Median	0.93719
Tb927.5.2790	Tb927.5.2790	11	11	11	>Tb927.5.2790 | organism=Trypanosoma_brucei_TREU927 | product=mitochondrial DNA polymerase beta-PAK (Pol beta-PAK) | location=Tb927_05_v5.1:939711-942152(-) | length=813 | sequence_SO=chromosome | SO=protein_coding	0.97348	0.974089	0.973785	0.00045692	1	11	11	11	7	9	7	9	7	9	19.4	19.4	19.4	87.228	813	813	3.16			16	3					0	108.98	0.85898	1.009	16.071	17	0	Median	0.78322	0.97348	19.551	7	0	Median	0.90823
Tb927.4.2170	Tb927.4.2170	5	5	5	>Tb927.4.2170 | organism=Trypanosoma_brucei_TREU927 | product=hypothetical protein, conserved | location=Tb927_04_v5.1:559051-559446(+) | length=131 | sequence_SO=chromosome | SO=protein_coding	1.0153	0.932314	0.973807	0.0622395	1	5	5	5	3	3	3	3	3	3	44.3	44.3	44.3	14.463	131	131	8								8	0	16.487	0.95618	1.0726	27.583	5	0	Median	0.79268	1.0153	38.259	3	1	Median	0.95618
Tb927.8.1950	Tb927.8.1950	9	9	9	>Tb927.8.1950 | organism=Trypanosoma_brucei_TREU927 | product=hypothetical protein, conserved | location=Tb927_08_v5.1:627302-629434(+) | length=710 | sequence_SO=chromosome | SO=protein_coding	0.89701	1.05064	0.973825	0.115223	1	9	9	9	4	6	4	6	4	6	22.4	22.4	22.4	78.766	710	710	3.9			1	9					0	14.375	0.78052	0.9518	14.941	7	0	Median	0.70402	0.89701	25.287	4	2	Median	0.78052
Tb927.10.5790	Tb927.10.5790	5	5	5	>Tb927.10.5790 | organism=Trypanosoma_brucei_TREU927 | product=hypothetical protein, conserved | location=Tb927_10_v5.1:1436891-1438501(-) | length=536 | sequence_SO=chromosome | SO=protein_coding	0.98957	0.958222	0.973896	0.0235113	1	5	5	5	3	3	3	3	3	3	12.1	12.1	12.1	59.193	536	536	5.38					7			1	0	27.727	0.81235	1.0162	23.256	6	0	Median	0.78329	0.98957	25.932	5	0	Median	0.92792
Tb927.11.4480	Tb927.11.4480	12	12	12	>Tb927.11.4480 | organism=Trypanosoma_brucei_TREU927 | product=radial spoke protein RSP4/6, putative | location=Tb927_11_v5.1:1297212-1298969(+) | length=585 | sequence_SO=chromosome | SO=protein_coding	0.992	0.95584	0.97392	0.0271199	1	12	12	12	10	9	10	9	10	9	31.3	31.3	31.3	66.905	585	585	5.44				3	14	5	5		0	62.756	0.81038	0.99212	15.099	21	0	Median	0.7907	0.992	15.042	12	0	Median	0.95622
Tb927.11.2470	Tb927.11.2470	20	20	20	>Tb927.11.2470 | organism=Trypanosoma_brucei_TREU927 | product=aminopeptidase, putative,metallo-peptidase, Clan MF, Family M17 | location=Tb927_11_v5.1:725560-727257(-) | length=565 | sequence_SO=chromosome | SO=protein_coding	0.98195	0.965997	0.973973	0.0119648	1	20	20	20	17	17	17	17	17	17	61.8	61.8	61.8	60.585	565	565	4.32				48	12	1	2		0	99.045	0.85802	1.0163	15.962	54	0	Median	0.76853	0.98195	18.666	32	0	Median	0.9171
Tb927.11.15430	Tb927.11.15430	10	10	10	>Tb927.11.15430 | organism=Trypanosoma_brucei_TREU927 | product=U5 small nuclear ribonucleoprotein component, putative,U5 snrnp-specific protein, putative | location=Tb927_11_v5.1:4097329-4100253(-) | length=974 | sequence_SO=chromosome | SO=protein_coding	0.95611	0.991867	0.973988	0.0268175	1	10	10	10	6	8	6	8	6	8	12.6	12.6	12.6	105.47	974	974	3			14						0	52.368	0.87468	0.99426	9.514	13	0	Median	0.76407	0.95611	10.763	6	0	Median	0.92332
Tb927.6.3150	Tb927.6.3150	45	45	45	>Tb927.6.3150 | organism=Trypanosoma_brucei_TREU927 | product=Hydin | location=Tb927_06_v5.1:927480-941045(+) | length=4521 | sequence_SO=chromosome | SO=protein_coding	0.98919	0.959049	0.974119	0.022606	1	45	45	45	28	36	28	36	28	36	15	15	15	501.13	4521	4521	1.48	43	36	1						0	203.81	0.8184	1.0037	14.01	65	0	Median	0.79448	0.98919	9.816	26	0	Median	0.89525
Tb927.3.5420	Tb927.3.5420	15	15	15	>Tb927.3.5420 | organism=Trypanosoma_brucei_TREU927 | product=protein transport protein Sec24 (SEC24.2) | location=Tb927_03_v5.1:1515728-1518439(+) | length=903 | sequence_SO=chromosome | SO=protein_coding	0.95807	0.990197	0.974134	0.0240953	1	15	15	15	11	9	11	9	11	9	28.6	28.6	28.6	100.87	903	903	3			22						0	43.318	0.79784	0.97561	18.696	18	0	Median	0.7721	0.95807	18.904	9	0	Median	0.91575
Tb927.10.13780;Tb11.v5.0718;Tb927.7.2420	Tb927.10.13780;Tb11.v5.0718	21;21;1	21;21;1	21;21;1	>Tb927.10.13780 | organism=Trypanosoma_brucei_TREU927 | product=glycogen synthase kinase 3 (GSK3) | location=Tb927_10_v5.1:3362271-3363329(-) | length=352 | sequence_SO=chromosome | SO=protein_coding;>Tb11.v5.0718 | organism=Trypanosoma_brucei_TREU927 | pr	0.9498	0.998502	0.974151	0.0365267	3	21	21	21	19	17	19	17	19	17	65.3	65.3	65.3	40.32	352	352;352;501	6.06						47	3		0	107.03	0.77793	0.97944	12.887	46	0	Median	0.73233	0.9498	13.328	24	0	Median	0.86008
Tb927.10.740;Tb11.v5.0750;Tb11.v5.0749	Tb927.10.740	19;7;3	19;7;3	19;7;3	>Tb927.10.740 | organism=Trypanosoma_brucei_TREU927 | product=structural maintenance of chromosome 4, putative (SMC4) | location=Tb927_10_v5.1:190483-194583(+) | length=1366 | sequence_SO=chromosome | SO=protein_coding	0.97838	0.970026	0.974203	0.00626536	3	19	19	19	15	11	15	11	15	11	19.7	19.7	19.7	154.7	1366	1366;586;368	2.17	1	28						1	0	54.078	0.83109	1.0074	19.418	23	0	Median	0.8097	0.97838	22.795	13	0	Median	0.88518
Tb927.10.4610	Tb927.10.4610	13	13	13	>Tb927.10.4610 | organism=Trypanosoma_brucei_TREU927 | product=dolicholphosphate-mannose synthase, putative (DPMS) | location=Tb927_10_v5.1:1174689-1175468(-) | length=259 | sequence_SO=chromosome | SO=protein_coding	1.0055	0.94304	0.97427	0.0468447	1	13	13	13	12	5	12	5	12	5	58.3	58.3	58.3	29.086	259	259	6.72						5	13		0	34.813	0.8012	1.0326	14.367	14	0	Median	0.77825	1.0055	14.944	11	0	Median	0.90082
Tb927.11.11380	Tb927.11.11380	6	6	6	>Tb927.11.11380 | organism=Trypanosoma_brucei_TREU927 | product=hypothetical protein, conserved | location=Tb927_11_v5.1:3038643-3040295(+) | length=550 | sequence_SO=chromosome | SO=protein_coding	0.99595	0.952653	0.974302	0.0324726	1	6	6	6	2	5	2	5	2	5	15.8	15.8	15.8	61.504	550	550	4.14				6	1				0	8.7368	0.83222	1.0128	19.455	6	0	Median	0.79697	0.99595	11.833	2	0	Median	0.87142
Tb927.3.3750	Tb927.3.3750	13	13	13	>Tb927.3.3750 | organism=Trypanosoma_brucei_TREU927 | product=paraflagellar rod component, putative (PFC7) | location=Tb927_03_v5.1:1046887-1048081(+) | length=176 | sequence_SO=chromosome | SO=protein_coding	1.0278	0.92081	0.974305	0.0802423	1	13	13	13	13	12	13	12	13	12	77.8	77.8	77.8	19.859	176	176	7.3							31	13	0	98.052	0.86577	1.0441	12.975	40	0	Median	0.81282	1.0278	13.446	21	0	Median	0.89148
Tb927.3.5620	Tb927.3.5620	48	48	48	>Tb927.3.5620 | organism=Trypanosoma_brucei_TREU927 | product=hypothetical protein, conserved | location=Tb927_03_v5.1:1568765-1571803(+) | length=1012 | sequence_SO=chromosome | SO=protein_coding	0.98823	0.96043	0.97433	0.0208498	1	48	48	48	46	39	46	39	46	39	55.5	55.5	55.5	112.6	1012	1012	2.22		106	4	10	1				0	260.85	0.82464	0.99858	12.665	101	0	Median	0.78266	0.98823	11.964	62	0	Median	0.88983
Tb927.2.3320	Tb927.2.3320	4	3	3	>Tb927.2.3320 | organism=Trypanosoma_brucei_TREU927 | product=65 kDa invariant surface glycoprotein | location=Tb927_02_v5.1:614694-617079(+) | length=437 | sequence_SO=chromosome | SO=protein_coding	0.96062	0.988142	0.974381	0.0206417	1	4	3	3	2	4	2	3	2	3	9.2	7.6	7.6	48.153	437	437	4.14				6	1				0	2.5787	0.80394	0.97223	22.381	7	0	Median	0.73881	0.96062	29.348	3	0	Median	0.83807
Tb927.5.1460	Tb927.5.1460	15	15	15	>Tb927.5.1460 | organism=Trypanosoma_brucei_TREU927 | product=hypothetical protein, conserved | location=Tb927_05_v5.1:520522-521502(-) | length=326 | sequence_SO=chromosome | SO=protein_coding	0.93723	1.01162	0.974427	0.0557952	1	15	15	15	14	14	14	14	14	14	44.8	44.8	44.8	36.762	326	326	6.66						32	11	13	0	75.903	0.79599	0.95127	14.589	49	0	Median	0.74632	0.93723	12.352	23	0	Median	0.84363
Tb927.11.2140	Tb927.11.2140	10	10	10	>Tb927.11.2140 | organism=Trypanosoma_brucei_TREU927 | product=hypothetical protein, conserved | location=Tb927_11_v5.1:607583-610924(+) | length=1113 | sequence_SO=chromosome | SO=protein_coding	0.92676	1.02211	0.974434	0.0715112	1	10	10	10	10	2	10	2	10	2	12	12	12	122.96	1113	1113	2.25		13	2	1					0	40.075	0.74012	0.92676	17.167	13	0	Median	0.74012	0.92676	16.161	11	0	Median	0.80398
Tb927.7.4420	Tb927.7.4420	15	15	15	>Tb927.7.4420 | organism=Trypanosoma_brucei_TREU927 | product=proteasome alpha 3 subunit, putative | location=Tb927_07_v5.1:1174410-1175270(-) | length=286 | sequence_SO=chromosome | SO=protein_coding	0.96102	0.987849	0.974435	0.0201221	1	15	15	15	15	15	15	15	15	15	61.9	61.9	61.9	32.154	286	286	6.1						39		2	0	143.63	0.8097	0.9654	13.023	38	0	Median	0.74511	0.96102	11.608	22	0	Median	0.87097
Tb927.5.2780	Tb927.5.2780	11	11	11	>Tb927.5.2780 | organism=Trypanosoma_brucei_TREU927 | product=mitochondrial DNA polymerase beta | location=Tb927_05_v5.1:935221-936444(-) | length=407 | sequence_SO=chromosome | SO=protein_coding	1.023	0.926441	0.97472	0.0724195	1	11	11	11	8	8	8	8	8	8	32.9	32.9	32.9	46.102	407	407	5.3					14	6			0	49.338	0.81283	1.0493	15.545	17	0	Median	0.78241	1.023	10.141	10	0	Median	0.92555
Tb927.9.8000	Tb927.9.8000	11	11	11	>Tb927.9.8000 | organism=Trypanosoma_brucei_TREU927 | product=ubiquitin-conjugating enzyme E2, putative,ubiquitin carrier protein, putative,ubiquitin-protein ligase, putative | location=Tb927_09_v5.1:1323553-1324005(-) | length=150 | sequence_SO=chromosome	0.97689	0.972573	0.974732	0.00323743	1	11	11	11	11	6	11	6	11	6	42	42	42	17.132	150	150	7.8							6	24	0	68.249	0.82725	1.0011	18.254	27	0	Median	0.77156	0.97689	17.678	16	0	Median	0.89112
Tb927.11.5910	Tb927.11.5910	24	24	24	>Tb927.11.5910 | organism=Trypanosoma_brucei_TREU927 | product=hypothetical protein, conserved | location=Tb927_11_v5.1:1675314-1679087(+) | length=1257 | sequence_SO=chromosome | SO=protein_coding	0.98544	0.964041	0.974741	0.0160491	1	24	24	24	23	7	23	7	23	7	27.2	27.2	27.2	143.97	1257	1257	2		33							0	61.121	0.80912	0.98544	22.723	25	0	Median	0.79632	0.98544	22.937	19	0	Median	0.93317
Tb927.11.8970	Tb927.11.8970	13	13	13	>Tb927.11.8970 | organism=Trypanosoma_brucei_TREU927 | product=ribose 5-phosphate isomerase, putative | location=Tb927_11_v5.1:2461686-2462708(+) | length=155 | sequence_SO=chromosome | SO=protein_coding	0.96445	0.985125	0.974787	0.015506	1	13	13	13	13	11	13	11	13	11	91	91	91	16.957	155	155	7.49	1					9	11	49	0	214.68	0.79396	0.98031	16.337	65	0	Median	0.76631	0.96445	17.898	39	0	Median	0.88449
Tb927.7.4480;Tb11.v5.0261	Tb927.7.4480;Tb11.v5.0261	11;11	11;11	11;11	>Tb927.7.4480 | organism=Trypanosoma_brucei_TREU927 | product=adenosine 5-monophosphoramidase, putative | location=Tb927_07_v5.1:1191513-1191982(-) | length=141 | sequence_SO=chromosome | SO=protein_coding;>Tb11.v5.0261 | organism=Trypanosoma_brucei_TREU9	1.0326	0.917011	0.974805	0.0866921	2	11	11	11	11	11	11	11	11	11	92.9	92.9	92.9	15.55	141	141;141	8								39	0	62.124	0.84754	1.0529	10.723	37	0	Median	0.8167	1.0326	8.4821	20	0	Median	0.90952
Tb927.9.10890	Tb927.9.10890	8	8	8	>Tb927.9.10890 | organism=Trypanosoma_brucei_TREU927 | product=hypothetical protein, conserved | location=Tb927_09_v5.1:1716244-1717032(-) | length=262 | sequence_SO=chromosome | SO=protein_coding	1.0722	0.877424	0.974812	0.146082	1	8	8	8	5	6	5	6	5	6	39.3	39.3	39.3	30.774	262	262	6.38						10	6		0	40.782	0.87048	1.0845	21.581	12	0	Median	0.82262	1.0722	7.7966	5	0	Median	1.0376
Tb927.5.1140	Tb927.5.1140	18	18	18	>Tb927.5.1140 | organism=Trypanosoma_brucei_TREU927 | product=choline/ethanolamine kinase (C/EK1) | location=Tb927_05_v5.1:445125-447101(+) | length=658 | sequence_SO=chromosome | SO=protein_coding	0.97537	0.974564	0.974967	0.000604588	1	18	18	18	16	15	16	15	16	15	41.9	41.9	41.9	73.294	658	658	4.24			1	38			1	2	0	115.76	0.84311	0.99214	9.9551	38	0	Median	0.77597	0.97537	10.915	23	0	Median	0.91874
Tb927.5.3260	Tb927.5.3260	18	18	18	>Tb927.5.3260 | organism=Trypanosoma_brucei_TREU927 | product=hypothetical protein, conserved | location=Tb927_05_v5.1:1075938-1080137(-) | length=1399 | sequence_SO=chromosome | SO=protein_coding	0.97541	0.974564	0.974987	0.000634588	1	18	18	18	15	10	15	10	15	10	20.4	20.4	20.4	149.17	1399	1399	2		26							0	57.136	0.80326	1.0002	16.007	23	0	Median	0.76994	0.97541	12.091	13	0	Median	0.88377
Tb927.6.640	Tb927.6.640	6	6	6	>Tb927.6.640 | organism=Trypanosoma_brucei_TREU927 | product=kinetoplastid-specific phospho-protein phosphatase, putative | location=Tb927_06_v5.1:265619-267823(-) | length=734 | sequence_SO=chromosome | SO=protein_coding	0.87276	1.07746	0.975109	0.153524	1	6	6	6	5	3	5	3	5	3	12.3	12.3	12.3	79.106	734	734	5.8				4		3		3	0	15.514	0.73742	0.88485	14.255	10	0	Median	0.6994	0.87276	13.399	6	0	Median	0.84867
Tb927.2.1330	Tb927.2.1330	13	2	2	>Tb927.2.1330 | organism=Trypanosoma_brucei_TREU927 | product=retrotransposon hot spot protein (RHS, pseudogene), putative,retrotransposon hot spot protein 6 (RHS6), degenerate | location=Tb927_02_v5.1:245650-247458(+) | length=602 | sequence_SO=chromosome	0.90669	1.04392	0.975304	0.102921	1	13	2	2	12	12	2	2	2	2	23.1	4.7	4.7	65.638	602	602	3	1	1	7	3					0	30.54	0.78563	0.94711	9.3545	12	0	Median	0.69867	0.90669	11.894	7	0	Median	0.81778
Tb927.3.5350	Tb927.3.5350	3	3	3	>Tb927.3.5350 | organism=Trypanosoma_brucei_TREU927 | product=hypothetical protein, conserved | location=Tb927_03_v5.1:1500815-1501132(+) | length=105 | sequence_SO=chromosome | SO=protein_coding	0.89722	1.0538	0.975508	0.117432	1	3	3	3	3	3	3	3	3	3	18.1	18.1	18.1	11.599	105	105	7.88							1	7	0	19.121	0.73455	0.92272	16.92	8	0	Median	0.70745	0.89722	13.172	3	0	Median	0.85402
Tb927.11.16830	Tb927.11.16830	13	13	13	>Tb927.11.16830 | organism=Trypanosoma_brucei_TREU927 | product=Rab-like 5, small G protein (RABL5) | location=Tb927_11_v5.1:4483052-4483711(-) | length=219 | sequence_SO=chromosome | SO=protein_coding	1.0034	0.947777	0.975589	0.0417169	1	13	13	13	13	9	13	9	13	9	68	68	68	24.466	219	219	7							25		0	197.63	0.79979	1.0205	15.398	23	0	Median	0.78819	1.0034	12.647	14	0	Median	0.87717
Tb927.10.540;Tb11.v5.0414	Tb927.10.540;Tb11.v5.0414	30;30	30;30	30;30	>Tb927.10.540 | organism=Trypanosoma_brucei_TREU927 | product=ATP-dependent DEAD/H RNA helicase, putative,DEAD box RNA helicase, putative | location=Tb927_10_v5.1:140816-142126(+) | length=436 | sequence_SO=chromosome | SO=protein_coding;>Tb11.v5.0414 | or	0.97132	0.979912	0.975616	0.00644386	2	30	30	30	26	28	26	28	26	28	74.8	74.8	74.8	49.226	436	436;436	5.63	1				69	19	13	10	0	217.38	0.80993	0.99726	16.433	100	0	Median	0.76407	0.97132	15.298	52	0	Median	0.87051
Tb927.2.5060;Tb10.v4.0129	Tb927.2.5060	17;1	17;1	17;1	>Tb927.2.5060 | organism=Trypanosoma_brucei_TREU927 | product=GTP binding protein, putative | location=Tb927_02_v5.1:895305-896489(-) | length=394 | sequence_SO=chromosome | SO=protein_coding	0.95296	0.998303	0.975631	0.0340072	2	17	17	17	15	12	15	12	15	12	54.1	54.1	54.1	44.349	394	394;167	5.72					17	15	1	3	0	82.509	0.80025	0.97914	13.659	28	0	Median	0.73759	0.95296	11.35	13	0	Median	0.8902
Tb927.5.3170	Tb927.5.3170	11	11	11	>Tb927.5.3170 | organism=Trypanosoma_brucei_TREU927 | product=ribose-phosphate pyrophosphokinase, putative (PRPS5) | location=Tb927_05_v5.1:1049134-1050753(-) | length=357 | sequence_SO=chromosome | SO=protein_coding	0.91507	1.03624	0.975654	0.0908754	1	11	11	11	8	10	8	10	8	10	43.1	43.1	43.1	39.188	357	357	4.32		4		17				4	0	36.142	0.78867	0.95496	9.9735	25	0	Median	0.7424	0.91507	7.6284	14	0	Median	0.83262
Tb927.5.1280	Tb927.5.1280	11	11	11	>Tb927.5.1280 | organism=Trypanosoma_brucei_TREU927 | product=alanine racemase, putative | location=Tb927_05_v5.1:478015-478788(+) | length=257 | sequence_SO=chromosome | SO=protein_coding	1.0192	0.932662	0.975931	0.0649036	1	11	11	11	11	5	11	5	11	5	55.6	55.6	55.6	27.575	257	257	6.71						5	12		0	48.142	0.85437	1.0444	9.9763	16	0	Median	0.82012	1.0192	10.314	12	0	Median	0.97244
Tb927.4.2140	Tb927.4.2140	10	10	10	>Tb927.4.2140 | organism=Trypanosoma_brucei_TREU927 | product=MBO2 | location=Tb927_04_v5.1:553424-556426(+) | length=1000 | sequence_SO=chromosome | SO=protein_coding	1.0245	0.927472	0.975986	0.0727712	1	10	10	10	9	2	9	2	9	2	12	12	12	114.76	1000	1000	2		11							0	31.007	0.81724	1.0055	17.823	9	0	Median	0.82842	1.0245	17.322	8	0	Median	0.95559
Tb927.6.4950	Tb927.6.4950	8	8	8	>Tb927.6.4950 | organism=Trypanosoma_brucei_TREU927 | product=mago nashi-like protein, putative | location=Tb927_06_v5.1:1365488-1365931(+) | length=147 | sequence_SO=chromosome | SO=protein_coding	1.0152	0.936944	0.976072	0.0586922	1	8	8	8	7	5	7	5	7	5	53.7	53.7	53.7	17.146	147	147	7							13		0	12.376	0.8212	1.0201	18.254	10	0	Median	0.79226	1.0152	22.155	6	0	Median	0.90624
Tb927.4.470	Tb927.4.470	5	5	5	>Tb927.4.470 | organism=Trypanosoma_brucei_TREU927 | product=snoRNP protein GAR1, putative | location=Tb927_04_v5.1:137277-137966(-) | length=229 | sequence_SO=chromosome | SO=protein_coding	1.0115	0.940645	0.976073	0.053141	1	5	5	5	5	5	5	5	5	5	40.2	40.2	40.2	21.783	229	229	7.33							14	7	0	35.063	0.82055	1.0407	10.978	16	0	Median	0.80568	1.0115	8.3301	10	0	Median	0.93578
Tb927.11.14190	Tb927.11.14190	37	37	37	>Tb927.11.14190 | organism=Trypanosoma_brucei_TREU927 | product=hypothetical protein, conserved | location=Tb927_11_v5.1:3761229-3764005(+) | length=924 | sequence_SO=chromosome | SO=protein_coding	0.94525	1.0072	0.976226	0.0464636	1	37	37	37	31	30	31	30	31	30	45.7	45.7	45.7	100.47	924	924	4.13			62	25	3	28	5	1	0	282.73	0.81038	0.96448	15.762	106	0	Median	0.74999	0.94525	14.729	55	0	Median	0.85532
Tb927.10.11310	Tb927.10.11310	15	15	15	>Tb927.10.11310 | organism=Trypanosoma_brucei_TREU927 | product=intraflagellar transport protein IFT55/IFT57, putative (IFT57/55) | location=Tb927_10_v5.1:2761335-2762576(+) | length=413 | sequence_SO=chromosome | SO=protein_coding	1.0163	0.936417	0.976359	0.059912	1	15	15	15	14	7	14	7	14	7	55.9	55.9	55.9	46.366	413	413	6.06					16	2	18		0	95.856	0.79672	1.0298	12.179	31	0	Median	0.79059	1.0163	10.066	20	0	Median	0.96603
Tb927.3.1900;Tb11.v5.0664	Tb927.3.1900	27;10	27;10	27;10	>Tb927.3.1900 | organism=Trypanosoma_brucei_TREU927 | product=hypothetical protein, conserved | location=Tb927_03_v5.1:493707-496310(-) | length=867 | sequence_SO=chromosome | SO=protein_coding	1.0078	0.94509	0.976445	0.0470323	2	27	27	27	27	15	27	15	27	15	46.3	46.3	46.3	95.755	867	867;532	2.6		49	13		1	1	3	1	0	119.37	0.80685	1.0092	17.539	55	0	Median	0.77292	1.0078	15.206	35	0	Median	0.93056
Tb927.9.10230	Tb927.9.10230	13	13	13	>Tb927.9.10230 | organism=Trypanosoma_brucei_TREU927 | product=hypothetical protein, conserved | location=Tb927_09_v5.1:1608745-1609251(-) | length=168 | sequence_SO=chromosome | SO=protein_coding	0.94119	1.01228	0.976734	0.0533167	1	13	13	13	12	9	12	9	12	9	53.6	53.6	53.6	18.769	168	168	7.48						1	24	25	0	82.298	0.75804	0.95026	11.101	45	0	Median	0.74098	0.94119	11.871	22	0	Median	0.80881
Tb927.6.4390	Tb927.6.4390	42	42	42	>Tb927.6.4390 | organism=Trypanosoma_brucei_TREU927 | product=kinesin, putative | location=Tb927_06_v5.1:1233753-1237088(-) | length=1111 | sequence_SO=chromosome | SO=protein_coding	0.93884	1.01463	0.976735	0.0568432	1	42	42	42	38	18	38	18	38	18	45.1	45.1	45.1	125.9	1111	1111	2.2		58	8	3					0	190.5	0.76244	0.95497	21.759	63	0	Median	0.74859	0.93884	23.811	44	0	Median	0.86017
Tb927.9.5100	Tb927.9.5100	41	19	19	>Tb927.9.5100 | organism=Trypanosoma_brucei_TREU927 | product=cAMP-specific phosphodiesterase (PDEB2) | location=Tb927_09_v5.1:908687-911464(+) | length=925 | sequence_SO=chromosome | SO=protein_coding	0.94064	1.01295	0.976793	0.0542291	1	41	19	19	33	36	12	17	12	17	54.7	27.1	27.1	103.22	925	925	3.03	1		34	3					0	89.418	0.81449	0.97301	11.728	34	0	Median	0.74096	0.94064	9.5945	14	0	Median	0.87579
Tb927.8.6390	Tb927.8.6390	23	23	23	>Tb927.8.6390 | organism=Trypanosoma_brucei_TREU927 | product=lysophospholipase, putative,alpha/beta hydrolase, putative (TbLysoPLA) | location=Tb927_08_v5.1:1855921-1856763(+) | length=280 | sequence_SO=chromosome | SO=protein_coding	0.98204	0.971628	0.976834	0.00780866	1	23	23	23	21	20	21	20	21	20	100	100	100	30.092	280	280	6.58	3	1				28	49	12	0	294.23	0.82008	1.0061	14.539	88	0	Median	0.78674	0.98204	13.073	47	0	Median	0.86576
Tb927.9.14430	Tb927.9.14430	11	11	11	>Tb927.9.14430 | organism=Trypanosoma_brucei_TREU927 | product=casein kinase II, putative | location=Tb927_09_v5.1:2254610-2255659(-) | length=349 | sequence_SO=chromosome | SO=protein_coding	0.96678	0.987167	0.976973	0.0152901	1	11	11	11	9	9	9	9	9	9	45.3	45.3	45.3	41.017	349	349	6						18			0	31.579	0.81514	0.99776	17.838	16	0	Median	0.77455	0.96678	17.296	8	0	Median	0.8651
Tb927.11.9180	Tb927.11.9180	6	6	6	>Tb927.11.9180 | organism=Trypanosoma_brucei_TREU927 | product=ADP-ribosylation factor GTPase activating protein, putative (Cnt-b5) | location=Tb927_11_v5.1:2515978-2516853(+) | length=291 | sequence_SO=chromosome | SO=protein_coding	0.98995	0.964227	0.977089	0.0192921	1	6	6	6	6	2	6	2	6	2	23.4	23.4	23.4	31.714	291	291	7.11							8	1	0	13.894	0.81757	1.0123	16.031	7	0	Median	0.79867	0.98995	17.514	6	0	Median	0.8949
Tb927.8.2620	Tb927.8.2620	5	5	5	>Tb927.8.2620 | organism=Trypanosoma_brucei_TREU927 | product=hypothetical protein, conserved | location=Tb927_08_v5.1:770953-773457(+) | length=834 | sequence_SO=chromosome | SO=protein_coding	1.0344	0.919879	0.977139	0.0858911	1	5	5	5	2	4	2	4	2	4	8.4	8.4	8.4	92.699	834	834	3.83			5					1	0	21.069	0.9362	1.0871	18.042	5	0	Median	0.81326	1.0344	22.533	2	0	Median	1.002
Tb927.9.10570	Tb927.9.10570	4	4	4	>Tb927.9.10570 | organism=Trypanosoma_brucei_TREU927 | product=predicted zinc finger protein | location=Tb927_09_v5.1:1662326-1663318(-) | length=321 | sequence_SO=chromosome | SO=protein_coding	1.048	0.90629	0.977145	0.106283	1	4	4	4	2	4	2	4	2	4	21.8	21.8	21.8	37.875	321	321	5.14					6	1			0	6.2486	0.8671	1.0961	9.9727	6	0	Median	0.78193	1.048	2.9779	3	0	Median	1.0188
Tb927.11.5820	Tb927.11.5820	1	1	1	>Tb927.11.5820 | organism=Trypanosoma_brucei_TREU927 | product=hypothetical protein, conserved | location=Tb927_11_v5.1:1651769-1652677(+) | length=302 | sequence_SO=chromosome | SO=protein_coding	1.0311	0.923446	0.977273	0.0807403	1	1	1	1	1	1	1	1	1	1	3.3	3.3	3.3	32.267	302	302	5.2	1				1	1	2		0	2.9647	0.91168	1.0446	6.8817	5	0	Median	0.83169	1.0311	8.5864	3	0	Median	0.95909
Tb927.9.4040;Tb927.9.3970	Tb927.9.4040;Tb927.9.3970	8;8	8;8	8;8	>Tb927.9.4040 | organism=Trypanosoma_brucei_TREU927 | product=nicotinamidase, putative (PNC1) | location=Tb927_09_v5.1:775368-775982(+) | length=204 | sequence_SO=chromosome | SO=protein_coding;>Tb927.9.3970 | organism=Trypanosoma_brucei_TREU927 | product=	0.92019	1.03453	0.977361	0.085757	2	8	8	8	8	4	8	4	8	4	38.2	38.2	38.2	22.391	204	204;204	7							13		0	54.376	0.77413	0.93431	13.455	12	0	Median	0.72508	0.92019	14.936	8	0	Median	0.83518
Tb927.2.280;Tb927.5.280;Tb10.v4.0220	Tb927.2.280	34;1;1	7;0;0	1;0;0	>Tb927.2.280 | organism=Trypanosoma_brucei_TREU927 | product=retrotransposon hot spot protein 2 (RHS2), putative | location=Tb927_02_v5.1:35798-38167(-) | length=789 | sequence_SO=chromosome | SO=protein_coding	0.9912	0.963763	0.977481	0.0205781	3	34	7	1	28	33	7	7	1	1	53.2	11.5	1.6	90.22	789	789;277;325	3.52			17	2			1	1	0	27.102	0.83097	1.0139	12.053	20	0	Median	0.78886	0.9912	12.534	8	0	Median	0.93111
Tb927.4.2060	Tb927.4.2060	25	25	25	>Tb927.4.2060 | organism=Trypanosoma_brucei_TREU927 | product=hypothetical protein, conserved | location=Tb927_04_v5.1:514552-516810(-) | length=586 | sequence_SO=chromosome | SO=protein_coding	1.0264	0.928764	0.977582	0.0732271	1	25	25	25	23	12	23	12	23	12	48.1	48.1	48.1	66.835	586	586	5.02				3	36		2		0	107.65	0.84005	1.0307	25.268	35	0	Median	0.80696	1.0264	13.712	23	0	Median	0.98023
Tb927.11.13670	Tb927.11.13670	37	37	37	>Tb927.11.13670 | organism=Trypanosoma_brucei_TREU927 | product=hypothetical protein, conserved | location=Tb927_11_v5.1:3640046-3644920(-) | length=1624 | sequence_SO=chromosome | SO=protein_coding	0.9653	0.989903	0.977601	0.0184522	1	37	37	37	19	32	19	32	19	32	29.9	29.9	29.9	183.5	1624	1624	1.78	13	46							0	190.64	0.83416	0.97301	19.911	50	0	Median	0.78607	0.9653	13.266	22	0	Median	0.89553
Tb927.8.900	Tb927.8.900	8	8	8	>Tb927.8.900 | organism=Trypanosoma_brucei_TREU927 | product=splicing factor TSR1 (TSR1) | location=Tb927_08_v5.1:267851-269421(-) | length=328 | sequence_SO=chromosome | SO=protein_coding	1.0623	0.892937	0.977618	0.127022	1	8	8	8	8	3	8	3	8	3	28.7	28.7	28.7	37.469	328	328	6.07					3	9		2	0	25.584	0.87474	1.0697	49.233	13	0	Median	0.84654	1.0623	26.167	9	0	Median	1.0198
Tb927.8.890	Tb927.8.890	19	19	17	>Tb927.8.890 | organism=Trypanosoma_brucei_TREU927 | product=small GTP-binding protein Rab1, putative | location=Tb927_08_v5.1:265034-266020(-) | length=208 | sequence_SO=chromosome | SO=protein_coding	0.94966	1.00562	0.977641	0.0419711	1	19	19	17	17	16	17	16	15	14	91.8	91.8	82.7	22.714	208	208	7.13	1					1	46	15	0	200.46	0.79256	0.9739	12.775	58	0	Median	0.74481	0.94966	11.864	28	0	Median	0.83399
Tb927.11.7020	Tb927.11.7020	16	16	16	>Tb927.11.7020 | organism=Trypanosoma_brucei_TREU927 | product=proteasome alpha 7 subunit, putative (PSA4) | location=Tb927_11_v5.1:1977633-1978376(-) | length=247 | sequence_SO=chromosome | SO=protein_coding	0.97836	0.976944	0.977652	0.00106191	1	16	16	16	15	11	15	11	15	11	79.4	79.4	79.4	27.865	247	247	6.72						13	20	3	0	99.422	0.81279	0.97845	19.825	29	0	Median	0.77582	0.97836	10.215	18	0	Median	0.92571
Tb927.8.4280	Tb927.8.4280	9	9	9	>Tb927.8.4280 | organism=Trypanosoma_brucei_TREU927 | product=nuclear transport factor 2, putative | location=Tb927_08_v5.1:1272250-1272624(-) | length=124 | sequence_SO=chromosome | SO=protein_coding	0.96185	0.993542	0.977696	0.023769	1	9	9	9	7	8	7	8	7	8	71.8	71.8	71.8	13.907	124	124	8								18	0	73.157	0.80116	0.98478	9.9941	15	0	Median	0.76017	0.96185	7.7693	7	0	Median	0.90291
Tb927.9.11940	Tb927.9.11940	4	4	4	>Tb927.9.11940 | organism=Trypanosoma_brucei_TREU927 | product=hypothetical protein, conserved | location=Tb927_09_v5.1:1866967-1867350(+) | length=127 | sequence_SO=chromosome | SO=protein_coding	0.87913	1.07629	0.977709	0.147868	1	4	4	4	4	3	4	3	4	3	34.6	34.6	34.6	14.045	127	127	7.89							1	8	0	9.3472	0.79755	0.91114	12.147	8	0	Median	0.70123	0.87913	13.405	5	0	Median	0.82828
Tb927.8.3770	Tb927.8.3770	18	18	18	>Tb927.8.3770 | organism=Trypanosoma_brucei_TREU927 | product=mitogen-activated protein kinase, putative (MPK10) | location=Tb927_08_v5.1:1123180-1124946(-) | length=409 | sequence_SO=chromosome | SO=protein_coding	1.0331	0.922339	0.97772	0.0830707	1	18	18	18	15	12	15	12	15	12	57.5	57.5	57.5	46.936	409	409	5.5					17	17			0	75.598	0.85193	1.0539	14.038	27	0	Median	0.80425	1.0331	9.6181	16	0	Median	0.96058
Tb927.8.2630	Tb927.8.2630	37	36	36	>Tb927.8.2630 | organism=Trypanosoma_brucei_TREU927 | product=kinesin, putative | location=Tb927_08_v5.1:774364-776616(+) | length=750 | sequence_SO=chromosome | SO=protein_coding	0.9887	0.966744	0.977722	0.016467	1	37	36	36	29	29	28	28	28	28	52.7	51.2	51.2	85.189	750	750	3.1			62	7					0	214.01	0.82636	1.0058	16.419	61	0	Median	0.78038	0.9887	15.381	31	0	Median	0.91297
Tb927.5.3610	Tb927.5.3610	4	4	4	>Tb927.5.3610 | organism=Trypanosoma_brucei_TREU927 | product=adaptor complex protein (AP) 3 delta subunit 1, putative | location=Tb927_05_v5.1:1185761-1189144(+) | length=1127 | sequence_SO=chromosome | SO=protein_coding	1.0153	0.940203	0.977752	0.0563227	1	4	4	4	4	2	4	2	4	2	4.1	4.1	4.1	125.4	1127	1127	2.5		6		2					0	8.4975	0.82231	0.98864	20.452	6	0	Median	0.82231	1.0153	23.148	4	0	Median	0.97371
Tb927.11.6010	Tb927.11.6010	5	5	5	>Tb927.11.6010 | organism=Trypanosoma_brucei_TREU927 | product=hypothetical protein, conserved | location=Tb927_11_v5.1:1701641-1702135(-) | length=164 | sequence_SO=chromosome | SO=protein_coding	0.95694	0.998602	0.977771	0.0312465	1	5	5	5	5	4	5	4	5	4	39.6	39.6	39.6	17.987	164	164	7.1							9	1	0	38.846	0.82943	1.0014	13.504	10	0	Median	0.7552	0.95694	16.277	6	0	Median	0.88571
Tb927.6.5070;REV__Tb927.11.2160	Tb927.6.5070	29;1	29;1	29;1	>Tb927.6.5070 | organism=Trypanosoma_brucei_TREU927 | product=hypothetical protein, conserved | location=Tb927_06_v5.1:1383939-1385303(+) | length=454 | sequence_SO=chromosome | SO=protein_coding	0.9776	0.978282	0.977941	0.000511602	2	29	29	29	28	24	28	24	28	24	65.2	65.2	65.2	51.821	454	454;154	5.39		2	2	5	65	8	8	10	0	176.43	0.81693	0.99289	13.724	92	0	Median	0.76097	0.9776	12.447	53	0	Median	0.88968
Tb927.7.3560	Tb927.7.3560	23	23	23	>Tb927.7.3560 | organism=Trypanosoma_brucei_TREU927 | product=hypothetical protein, conserved | location=Tb927_07_v5.1:921447-926729(-) | length=1760 | sequence_SO=chromosome | SO=protein_coding	1.0123	0.943841	0.978071	0.0513439	1	23	23	23	17	21	17	21	17	21	17.8	17.8	17.8	199.21	1760	1760	1.96	6	38		2					0	219.28	0.88787	1.0305	18.537	41	0	Median	0.81061	1.0123	19.415	20	0	Median	0.92262
Tb927.11.7270;Tb11.v5.0256	Tb927.11.7270;Tb11.v5.0256	7;7	7;7	7;7	>Tb927.11.7270 | organism=Trypanosoma_brucei_TREU927 | product=proteasome beta 3 subunit, putative (PSB3) | location=Tb927_11_v5.1:2053334-2053951(+) | length=205 | sequence_SO=chromosome | SO=protein_coding;>Tb11.v5.0256 | organism=Trypanosoma_brucei_TREU	0.93459	1.02171	0.978151	0.065341	2	7	7	7	6	7	6	7	6	7	39	39	39	22.484	205	205;205	7.44							14	11	0	62.904	0.75937	0.9463	9.1306	20	0	Median	0.73515	0.93459	6.3743	10	0	Median	0.83513
Tb927.5.1660	Tb927.5.1660	16	16	16	>Tb927.5.1660 | organism=Trypanosoma_brucei_TREU927 | product=protein phosphatase 2C, putative | location=Tb927_05_v5.1:581381-582658(+) | length=425 | sequence_SO=chromosome | SO=protein_coding	0.95562	1.00069	0.978155	0.0338029	1	16	16	16	14	13	14	13	14	13	48.2	48.2	48.2	46.85	425	425	5.26					29	10			0	80.685	0.78947	0.99206	18.824	35	0	Median	0.74333	0.95562	18.804	20	0	Median	0.90796
Tb927.11.2280	Tb927.11.2280	3	3	3	>Tb927.11.2280 | organism=Trypanosoma_brucei_TREU927 | product=hypothetical protein, conserved | location=Tb927_11_v5.1:648084-650672(+) | length=862 | sequence_SO=chromosome | SO=protein_coding	1.0335	0.92285	0.978175	0.0829877	1	3	3	3	3	3	3	3	3	3	6.1	6.1	6.1	97.079	862	862	3			7						0	36.396	0.83449	1.0704	14.195	5	0	Median	0.81102	1.0335	10.426	4	2	Median	0.99263
Tb927.10.830	Tb927.10.830	14	14	14	>Tb927.10.830 | organism=Trypanosoma_brucei_TREU927 | product=adenylate kinase, putative | location=Tb927_10_v5.1:215236-216018(+) | length=260 | sequence_SO=chromosome | SO=protein_coding	0.97753	0.978857	0.978193	0.000995022	1	14	14	14	12	11	12	11	12	11	64.6	64.6	64.6	29.765	260	260	6.25						24	8		0	49.905	0.82837	1.0184	17.445	29	0	Median	0.78644	0.97753	22.545	15	0	Median	0.90101
Tb927.1.2750	Tb927.1.2750	10	10	10	>Tb927.1.2750 | organism=Trypanosoma_brucei_TREU927 | product=hypothetical protein, conserved | location=Tb927_01_v5.1:633309-633871(+) | length=168 | sequence_SO=chromosome | SO=protein_coding	1.0034	0.953107	0.978254	0.0377197	1	10	10	10	9	6	9	6	9	6	69.6	69.6	69.6	18.698	168	168	7.38							18	11	0	72.267	0.84278	1.0202	9.8439	24	0	Median	0.78662	1.0034	8.2533	16	0	Median	0.92151
Tb927.9.7540	Tb927.9.7540	6	6	6	>Tb927.9.7540 | organism=Trypanosoma_brucei_TREU927 | product=calpain-like cysteine peptidase, putative,cysteine peptidase, Clan CA, family C2, putative | location=Tb927_09_v5.1:1239278-1241848(-) | length=856 | sequence_SO=chromosome | SO=protein_coding	1.1373	0.819269	0.978285	0.238523	1	6	6	6	4	3	4	3	4	3	11.4	11.4	11.4	95.448	856	856	3.12			7	1					0	9.4069	0.91324	1.1373	18.724	7	0	Median	0.90054	1.1373	15.277	3	0	Median	1.055
Tb11.v5.0489;Tb927.6.5170;Tb11.v5.0294;Tb11.0050;Tb927.4.290;Tb927.4.280;Tb927.4.270;Tb927.4.260;Tb927.4.300;Tb927.7.2000	Tb11.v5.0489	39;2;1;1;1;1;1;1;1;1	5;0;0;0;0;0;0;0;0;0	4;0;0;0;0;0;0;0;0;0	>Tb11.v5.0489 | organism=Trypanosoma_brucei_TREU927 | product=retrotransposon hot spot (RHS) protein, putative | location=Tb927_11_bin_v5.1:1982945-1984666(-) | length=573 | sequence_SO=random_sequence | SO=protein_coding	0.99216	0.964506	0.978333	0.0207404	10	39	5	4	36	35	5	5	4	4	60.4	14.1	11	65.818	573	573;337;273;317;557;557;557;557;572;691	3			13						0	120.36	0.85419	1.0258	19.927	13	0	Median	0.78748	0.99216	5.8833	5	0	Median	0.94435
Tb927.9.400	Tb927.9.400	3	3	3	>Tb927.9.400 | organism=Trypanosoma_brucei_TREU927 | product=variant surface glycoprotein (VSG, pseudogene), putative | location=Tb927_09_v5.1:95344-96918(+) | length=524 | sequence_SO=chromosome | SO=protein_coding	0.97181	0.985125	0.978467	0.00998596	1	3	3	3	3	2	3	2	3	2	2.1	2.1	2.1	55.637	524	524	4.27	3	4	2	4	10	4	3		0	4.0439	0.77573	0.97357	23.719	26	0	Median	0.7442	0.97181	22.289	15	0	Median	0.80121
Tb927.9.12070	Tb927.9.12070	26	26	26	>Tb927.9.12070 | organism=Trypanosoma_brucei_TREU927 | product=hypothetical protein, conserved | location=Tb927_09_v5.1:1880408-1883400(+) | length=995 | sequence_SO=chromosome | SO=protein_coding	0.99014	0.966837	0.978489	0.0174769	1	26	26	26	22	20	22	20	22	20	35.7	35.7	35.7	109.87	995	995	3		5	47	5					0	263.05	0.84736	1.0248	17.834	53	0	Median	0.78495	0.99014	21.775	28	0	Median	0.92204
Tb927.11.510;Tb927.11.500	Tb927.11.510;Tb927.11.500	6;5	6;5	6;5	>Tb927.11.510 | organism=Trypanosoma_brucei_TREU927 | product=RNA-binding protein, UBP2 (UBP2) | location=Tb927_11_v5.1:126101-127274(-) | length=175 | sequence_SO=chromosome | SO=protein_coding;>Tb927.11.500 | organism=Trypanosoma_brucei_TREU927 | product	0.98479	0.972195	0.978493	0.00944609	2	6	6	6	6	5	6	5	6	5	37.7	37.7	37.7	19.559	175	175;219	7.5							13	13	0	71.357	0.8401	0.9954	8.3262	24	0	Median	0.77883	0.98479	10.009	15	0	Median	0.86963
Tb927.11.9440	Tb927.11.9440	10	10	10	>Tb927.11.9440 | organism=Trypanosoma_brucei_TREU927 | product=hypothetical protein, conserved | location=Tb927_11_v5.1:2584609-2586267(-) | length=552 | sequence_SO=chromosome | SO=protein_coding	1.0057	0.951294	0.978497	0.0408047	1	10	10	10	5	9	5	9	5	9	27.9	27.9	27.9	61.765	552	552	4.12				14	2				0	34.05	0.86788	1.0124	10.942	15	0	Median	0.80197	1.0057	9.4667	7	0	Median	0.91179
Tb927.9.6290	Tb927.9.6290	38	38	7	>Tb927.9.6290 | organism=Trypanosoma_brucei_TREU927 | product=arginine kinase (AK) | location=Tb927_09_v5.1:1033220-1034290(+) | length=356 | sequence_SO=chromosome | SO=protein_coding	1.0045	0.952562	0.978531	0.0389532	1	38	38	7	37	29	37	29	7	5	70.5	70.5	12.1	40.196	356	356	5.56	7	3	6	7	63	102	30	7	0	323.31	0.81708	1.0187	13.143	211	0	Median	0.7811	1.0045	12.42	119	0	Median	0.90678
Tb927.5.860	Tb927.5.860	4	4	4	>Tb927.5.860 | organism=Trypanosoma_brucei_TREU927 | product=selenoprotein, putative (SelT) | location=Tb927_05_v5.1:350754-352113(+) | length=259 | sequence_SO=chromosome | SO=protein_coding	1.0135	0.943752	0.978626	0.0523107	1	4	4	4	3	3	3	3	3	3	18.1	18.1	18.1	28.792	259	259	7							6		0	5.2792	0.91185	1.0596	16.579	4	0	Median	0.80398	1.0135	28.258	2	0	Median	0.91185
Tb927.6.4800	Tb927.6.4800	4	4	4	>Tb927.6.4800 | organism=Trypanosoma_brucei_TREU927 | product=hypothetical protein, conserved | location=Tb927_06_v5.1:1337604-1338860(+) | length=418 | sequence_SO=chromosome | SO=protein_coding	0.84118	1.11611	0.978644	0.206197	1	4	4	4	3	2	3	2	3	2	11.2	11.2	11.2	46.376	418	418	4.4		1			4				0	9.5426	0.71092	0.84118	14.968	5	0	Median	0.67019	0.84118	16.251	3	0	Median	0.78982
Tb927.3.5550	Tb927.3.5550	10	10	10	>Tb927.3.5550 | organism=Trypanosoma_brucei_TREU927 | product=small GTP-binding protein, putative (TbRX1) | location=Tb927_03_v5.1:1558311-1558862(+) | length=183 | sequence_SO=chromosome | SO=protein_coding	0.9804	0.976944	0.978672	0.00259191	1	10	10	10	8	10	8	10	8	10	60.1	60.1	60.1	20.638	183	183	6.83		1					22	1	0	65.285	0.81214	1.0053	8.9697	18	0	Median	0.7684	0.9804	5.782	8	0	Median	0.89465
Tb927.6.620	Tb927.6.620	21	21	21	>Tb927.6.620 | organism=Trypanosoma_brucei_TREU927 | product=hypothetical protein, conserved | location=Tb927_06_v5.1:250957-259143(-) | length=2728 | sequence_SO=chromosome | SO=protein_coding	0.98549	0.972101	0.978795	0.010042	1	21	21	21	13	15	13	15	13	15	12.9	12.9	12.9	301.88	2728	2728	1.67	15	20			1				0	50.569	0.83008	0.99031	28.497	26	0	Median	0.78865	0.98549	25.625	9	0	Median	0.91347
Tb927.3.5370	Tb927.3.5370	12	12	12	>Tb927.3.5370 | organism=Trypanosoma_brucei_TREU927 | product=hypothetical protein, conserved | location=Tb927_03_v5.1:1503347-1505067(+) | length=313 | sequence_SO=chromosome | SO=protein_coding	0.97813	0.97972	0.978925	0.00119235	1	12	12	12	12	7	12	7	12	7	46	46	46	34.254	313	313	6.27				1	12	10	4	10	0	90.34	0.76097	0.98328	20.426	29	0	Median	0.75153	0.97813	14.502	19	0	Median	0.87657
Tb927.3.720	Tb927.3.720	3	3	3	>Tb927.3.720 | organism=Trypanosoma_brucei_TREU927 | product=zinc finger protein 2, putative (ZFP3) | location=Tb927_03_v5.1:176646-177038(-) | length=130 | sequence_SO=chromosome | SO=protein_coding	0.93954	1.01839	0.978966	0.0591391	1	3	3	3	3	2	3	2	3	2	33.8	33.8	33.8	14.168	130	130	8								5	0	6.5104	0.75985	0.93954	5.6094	5	0	Median	0.73654	0.93954	2.9733	3	0	Median	0.87766
Tb927.8.5070	Tb927.8.5070	6	6	6	>Tb927.8.5070 | organism=Trypanosoma_brucei_TREU927 | product=hypothetical protein, conserved | location=Tb927_08_v5.1:1497174-1497926(+) | length=125 | sequence_SO=chromosome | SO=protein_coding	1.0268	0.931272	0.979036	0.0716459	1	6	6	6	3	4	3	4	3	4	36	36	36	14.117	125	125	7.12	1							7	0	4.6353	0.97429	1.0738	14.668	5	0	Median	0.82294	1.0268	19.454	3	0	Median	0.97429
Tb927.3.3490	Tb927.3.3490	24	24	24	>Tb927.3.3490 | organism=Trypanosoma_brucei_TREU927 | product=high mobility group protein, putative (TDP1) | location=Tb927_03_v5.1:985606-986436(+) | length=271 | sequence_SO=chromosome | SO=protein_coding	1.0005	0.957671	0.979085	0.0321218	1	24	24	24	23	18	23	18	23	18	66.8	66.8	66.8	30.866	271	271	6.4						50	9	9	0	112.27	0.80135	1.0089	12.061	63	0	Median	0.77914	1.0005	10.702	38	0	Median	0.88545
Tb927.8.3530	Tb927.8.3530	27	27	27	>Tb927.8.3530 | organism=Trypanosoma_brucei_TREU927 | product=glycerol-3-phosphate dehydrogenase [NAD ], glycosomal | location=Tb927_08_v5.1:1057304-1058368(-) | length=354 | sequence_SO=chromosome | SO=protein_coding	0.95102	1.00779	0.979405	0.0425777	1	27	27	27	27	21	27	21	27	21	77.4	77.4	77.4	37.805	354	354	5.37	16	19	19	20	17	89	38	36	0	323.31	0.7852	0.96653	13.299	232	0	Median	0.75164	0.95102	11.05	122	0	Median	0.85438
Tb927.4.450	Tb927.4.450	60	60	60	>Tb927.4.450 | organism=Trypanosoma_brucei_TREU927 | product=coatomer alpha subunit, putative (TbCoatomerAlpha) | location=Tb927_04_v5.1:131246-134824(-) | length=1192 | sequence_SO=chromosome | SO=protein_coding	0.97782	0.981065	0.979443	0.00243408	1	60	60	60	59	42	59	42	59	42	67.4	67.4	67.4	132.85	1192	1192	2.36	1	119	13	13	4	1			0	323.31	0.80614	0.98887	19.747	129	0	Median	0.7735	0.97782	20.182	79	0	Median	0.8865
Tb927.8.1190;Tb927.8.1170;Tb11.v5.0871	Tb927.8.1190;Tb927.8.1170;Tb11.v5.0871	9;9;7	9;9;7	9;9;7	>Tb927.8.1190 | organism=Trypanosoma_brucei_TREU927 | product=hypothetical protein, conserved | location=Tb927_08_v5.1:379292-380624(-) | length=331 | sequence_SO=chromosome | SO=protein_coding;>Tb927.8.1170 | organism=Trypanosoma_brucei_TREU927 | product=	0.99482	0.96432	0.97957	0.0228749	3	9	9	9	9	8	9	8	9	8	45.9	45.9	45.9	36.419	331	331;331;310	6.59						17	7	5	0	57.427	0.82226	1.0157	13.192	27	0	Median	0.79485	0.99482	11.414	14	0	Median	0.92554
Tb927.3.1590	Tb927.3.1590	23	23	23	>Tb927.3.1590 | organism=Trypanosoma_brucei_TREU927 | product=mitochondrial RNA binding complex 1 subunit (MRB1590) | location=Tb927_03_v5.1:414759-416765(-) | length=668 | sequence_SO=chromosome | SO=protein_coding	0.95472	1.00449	0.979605	0.0373276	1	23	23	23	18	19	18	19	18	19	48.8	48.8	48.8	72.678	668	668	4				41					0	81.732	0.83173	0.97946	10.083	34	0	Median	0.7507	0.95472	10.354	16	0	Median	0.88105
Tb927.8.5760	Tb927.8.5760	14	14	14	>Tb927.8.5760 | organism=Trypanosoma_brucei_TREU927 | product=hypothetical protein, conserved | location=Tb927_08_v5.1:1701926-1703362(+) | length=478 | sequence_SO=chromosome | SO=protein_coding	1.0041	0.955384	0.979742	0.0365373	1	14	14	14	11	8	11	8	11	8	39.3	39.3	39.3	53.809	478	478	5.12					21	3			0	46.071	0.83263	1.0066	11.43	17	0	Median	0.78725	1.0041	10.141	10	0	Median	0.93767
Tb927.10.450	Tb927.10.450	33	33	33	>Tb927.10.450 | organism=Trypanosoma_brucei_TREU927 | product=hypothetical protein, conserved | location=Tb927_10_v5.1:116855-118612(+) | length=585 | sequence_SO=chromosome | SO=protein_coding	0.9951	0.964413	0.979757	0.0230151	1	33	33	33	25	29	25	29	25	29	53.5	53.5	53.5	65.63	585	585	1.88	66	14	1					9	0	265.34	0.82969	1.0264	26.301	85	0	Median	0.79016	0.9951	14.974	41	0	Median	0.87483
Tb927.2.380	Tb927.2.380	36	36	4	>Tb927.2.380 | organism=Trypanosoma_brucei_TREU927 | product=retrotransposon hot spot protein 2 (RHS2), putative | location=Tb927_02_v5.1:61399-63768(-) | length=789 | sequence_SO=chromosome | SO=protein_coding	0.99124	0.968335	0.979788	0.0171784	1	36	36	4	29	33	29	33	3	4	54.5	54.5	7	90.713	789	789	3.21	2	6	74	6	2	4	2		0	204.52	0.82956	1.0118	13.787	83	0	Median	0.77924	0.99124	10.454	39	0	Median	0.92366
Tb927.11.13180	Tb927.11.13180	14	14	14	>Tb927.11.13180 | organism=Trypanosoma_brucei_TREU927 | product=hypothetical protein conserved | location=Tb927_11_v5.1:3534820-3536717(-) | length=560 | sequence_SO=chromosome | SO=protein_coding	1.0447	0.914997	0.979848	0.0972774	1	14	14	14	10	11	10	11	10	11	38.4	38.4	38.4	61.21	560	560	4.32				24	6			1	0	44.405	0.87013	1.0739	17.466	26	0	Median	0.81773	1.0447	22.852	12	0	Median	0.92937
Tb927.1.4830	Tb927.1.4830	12	12	12	>Tb927.1.4830 | organism=Trypanosoma_brucei_TREU927 | product=phospholipase A1 (PLA1) | location=Tb927_01_v5.1:986718-987620(+) | length=300 | sequence_SO=chromosome | SO=protein_coding	0.85747	1.10226	0.979863	0.18359	1	12	12	12	9	10	9	10	9	10	54.3	54.3	54.3	32.404	300	300	6.43						13	10		0	104.48	0.72228	0.88678	12.483	20	0	Median	0.68027	0.85747	15.631	10	0	Median	0.8083
Tb927.11.9640	Tb927.11.9640	34	34	34	>Tb927.11.9640 | organism=Trypanosoma_brucei_TREU927 | product=glycyl-tRNA synthetase, putative | location=Tb927_11_v5.1:2620223-2622097(-) | length=624 | sequence_SO=chromosome | SO=protein_coding	0.96048	0.9993	0.97989	0.0291154	1	34	34	34	31	30	31	30	31	30	58.8	58.8	58.8	70.175	624	624	4.1				80		1	2		0	143.76	0.82007	0.97679	10.999	72	0	Median	0.75921	0.96048	12.285	39	0	Median	0.85589
Tb927.11.16740	Tb927.11.16740	7	7	7	>Tb927.11.16740 | organism=Trypanosoma_brucei_TREU927 | product=chaperone protein DNAj, putative | location=Tb927_11_v5.1:4454558-4455712(-) | length=384 | sequence_SO=chromosome | SO=protein_coding	0.9068	1.05299	0.979893	0.10964	1	7	7	7	7	2	7	2	7	2	22.9	22.9	22.9	42.846	384	384	6.36					2	6		3	0	13.05	0.71579	0.9068	13.555	10	0	Median	0.71579	0.9068	10.703	8	0	Median	0.8309
Tb927.11.4130	Tb927.11.4130	9	9	9	>Tb927.11.4130 | organism=Trypanosoma_brucei_TREU927 | product=ubiquitin-like protein, putative | location=Tb927_11_v5.1:1207386-1209283(-) | length=620 | sequence_SO=chromosome | SO=protein_coding	1.0356	0.924642	0.980121	0.0832187	1	9	9	9	8	6	8	6	8	6	21.8	21.8	21.8	67.282	620	620	4				14					0	29.499	0.91215	1.0408	14.572	14	0	Median	0.82445	1.0356	18.413	8	0	Median	0.97351
Tb927.3.2670	Tb927.3.2670	8	8	8	>Tb927.3.2670 | organism=Trypanosoma_brucei_TREU927 | product=hypothetical protein, conserved | location=Tb927_03_v5.1:677909-678718(-) | length=269 | sequence_SO=chromosome | SO=protein_coding	1.0757	0.884721	0.98021	0.143234	1	8	8	8	7	2	7	2	7	2	44.2	44.2	44.2	28.84	269	269	6.8						2	8		0	11.759	0.87262	1.0776	15.101	9	0	Median	0.87067	1.0757	15.595	8	0	Median	0.98737
Tb927.6.4500	Tb927.6.4500	6	6	6	>Tb927.6.4500 | organism=Trypanosoma_brucei_TREU927 | product=hypothetical protein, conserved | location=Tb927_06_v5.1:1262686-1263297(-) | length=203 | sequence_SO=chromosome | SO=protein_coding	0.94082	1.01971	0.980266	0.0591683	1	6	6	6	6	6	6	6	6	6	36.9	36.9	36.9	22.705	203	203	7.28							18	7	0	110.64	0.77715	0.9615	14.144	17	0	Median	0.75079	0.94082	9.4705	11	0	Median	0.85187
Tb927.11.9890	Tb927.11.9890	16	16	16	>Tb927.11.9890 | organism=Trypanosoma_brucei_TREU927 | product=signal recognition particle receptor alpha subunit, putative | location=Tb927_11_v5.1:2668628-2670376(+) | length=582 | sequence_SO=chromosome | SO=protein_coding	0.92263	1.03795	0.980289	0.086488	1	16	16	16	10	14	10	14	10	14	42.6	42.6	42.6	63.526	582	582	4.11			1	24		2			0	54.298	0.81114	0.95016	13.59	24	0	Median	0.73319	0.92263	11.306	10	0	Median	0.8679
Tb927.8.4770	Tb927.8.4770	6	5	5	>Tb927.8.4770 | organism=Trypanosoma_brucei_TREU927 | product=small GTP-binding protein Rab18 (TbRAB18) | location=Tb927_08_v5.1:1403399-1404568(-) | length=215 | sequence_SO=chromosome | SO=protein_coding	0.98095	0.97972	0.980335	0.00092265	1	6	5	5	3	6	2	5	2	5	31.6	27.9	27.9	23.467	215	215	7							7		0	12.011	0.78154	0.9864	18.814	5	0	Median	0.77304	0.98095	0.78222	2	0	Median	0.83855
Tb927.10.8600	Tb927.10.8600	9	9	9	>Tb927.10.8600 | organism=Trypanosoma_brucei_TREU927 | product=hypothetical protein, conserved | location=Tb927_10_v5.1:2130956-2134225(+) | length=1089 | sequence_SO=chromosome | SO=protein_coding	0.96882	0.992063	0.980442	0.0174326	1	9	9	9	9	2	9	2	9	2	13.2	13.2	13.2	119.84	1089	1089	2.91		9				1		1	0	15.366	0.82521	0.99068	17.103	10	0	Median	0.77135	0.96882	18.985	8	0	Median	0.89138
Tb927.10.15000	Tb927.10.15000	10	10	10	>Tb927.10.15000 | organism=Trypanosoma_brucei_TREU927 | product=hypothetical protein, conserved | location=Tb927_10_v5.1:3666262-3667530(+) | length=422 | sequence_SO=chromosome | SO=protein_coding	1.024	0.937119	0.98056	0.0651605	1	10	10	10	9	6	9	6	9	6	41.9	41.9	41.9	48.002	422	422	5					17				0	40.916	0.84022	1.0347	16.215	16	0	Median	0.81557	1.024	13.914	9	0	Median	0.91301
Tb927.11.3030	Tb927.11.3030	9	9	9	>Tb927.11.3030 | organism=Trypanosoma_brucei_TREU927 | product=phosphoribosylpyrophosphate synthetase, putative (PRS) | location=Tb927_11_v5.1:873641-874711(-) | length=356 | sequence_SO=chromosome | SO=protein_coding	0.94831	1.01282	0.980566	0.0483842	1	9	9	9	9	9	9	9	9	9	37.9	37.9	37.9	39.402	356	356	6.26						20		3	0	73.127	0.7865	0.97325	14.191	17	0	Median	0.75618	0.94831	13.706	9	0	Median	0.87534
Tb11.v5.0196;Tb927.10.6030	Tb11.v5.0196;Tb927.10.6030	19;18	19;18	19;18	>Tb11.v5.0196 | organism=Trypanosoma_brucei_TREU927 | product=hypothetical protein, conserved | location=Tb927_11_bin_v5.1:285932-286732(-) | length=266 | sequence_SO=random_sequence | SO=protein_coding;>Tb927.10.6030 | organism=Trypanosoma_brucei_TREU927	0.99209	0.969274	0.980682	0.017112	2	19	19	19	15	16	15	16	15	16	87.6	87.6	87.6	29.335	266	266;266	6.56						17	22		0	100.91	0.82546	1.0266	10.139	36	0	Median	0.79118	0.99209	9.7466	20	0	Median	0.91243
Tb927.8.6760;Tb927.8.6750	Tb927.8.6760;Tb927.8.6750	13;9	13;9	13;9	>Tb927.8.6760 | organism=Trypanosoma_brucei_TREU927 | product=IgE-dependent histamine-releasing factor, putative | location=Tb927_08_v5.1:1954263-1954775(-) | length=170 | sequence_SO=chromosome | SO=protein_coding;>Tb927.8.6750 | organism=Trypanosoma_bruc	0.96197	0.9995	0.980735	0.0281477	2	13	13	13	13	9	13	9	13	9	88.2	88.2	88.2	19.35	170	170;170	7.22							31	9	0	75.541	0.7816	0.97437	8.664	37	0	Median	0.74797	0.96197	6.7502	23	0	Median	0.8494
Tb927.9.11600	Tb927.9.11600	29	29	11	>Tb927.9.11600 | organism=Trypanosoma_brucei_TREU927 | product=unspecified product (gim5B) | location=Tb927_09_v5.1:1806052-1808712(+) | length=241 | sequence_SO=chromosome | SO=protein_coding	0.95787	1.00385	0.980862	0.0344886	1	29	29	11	26	22	26	22	9	7	90	90	24.5	25.975	241	241	5.98	12	9	7	10	13	24	97	25	0	323.31	0.77921	0.96958	21.816	169	0	Median	0.75401	0.95787	12.134	89	0	Median	0.87621
Tb927.3.2600	Tb927.3.2600	91	91	91	>Tb927.3.2600 | organism=Trypanosoma_brucei_TREU927 | product=ATP-dependent DEAD/H RNA helicase, putative | location=Tb927_03_v5.1:652291-658803(-) | length=2170 | sequence_SO=chromosome | SO=protein_coding	0.93104	1.03092	0.980979	0.0749079	1	91	91	91	75	84	75	84	75	84	49.5	49.5	49.5	244.99	2170	2170	2.02	145	131	69	32	2	3			0	323.31	0.7898	0.9474	17.807	335	0	Median	0.73571	0.93104	18.401	148	0	Median	0.84071
Tb927.2.5410	Tb927.2.5410	2	2	2	>Tb927.2.5410 | organism=Trypanosoma_brucei_TREU927 | product=ABC transporter, putative,multidrug resistance protein | location=Tb927_02_v5.1:963330-967175(-) | length=1281 | sequence_SO=chromosome | SO=protein_coding	0.95563	1.00669	0.981162	0.0382984	1	2	2	2	2	2	2	2	2	2	0.9	0.9	0.9	142.66	1281	1281	5.36				2	5	3		1	0.0026346	1.4766	0.84598	0.96981	7.3849	11	0	Median	0.74407	0.95563	7.1772	4	0	Median	0.88387
Tb927.10.8290;Tb927.10.8270;Tb11.v5.0877	Tb927.10.8290;Tb927.10.8270;Tb11.v5.0877	30;30;19	30;30;19	30;30;19	>Tb927.10.8290 | organism=Trypanosoma_brucei_TREU927 | product=eukaryotic translation initiation factor 3 subunit 8, putative | location=Tb927_10_v5.1:2052196-2054418(-) | length=740 | sequence_SO=chromosome | SO=protein_coding;>Tb927.10.8270 | organism=Tr	0.97009	0.99226	0.981175	0.0166278	3	30	30	30	28	23	28	23	28	23	54.5	54.5	54.5	84.339	740	740;740;490	3.37			53	31					0	169.9	0.78254	0.97631	18.034	78	0	Median	0.77001	0.97009	16.77	41	0	Median	0.86341
Tb927.10.1510	Tb927.10.1510	101	101	101	>Tb927.10.1510 | organism=Trypanosoma_brucei_TREU927 | product=NOT1 (NOT1) | location=Tb927_10_v5.1:405276-412256(-) | length=2326 | sequence_SO=chromosome | SO=protein_coding	0.98801	0.974374	0.981192	0.010227	1	101	101	101	92	85	92	85	92	85	55.3	55.3	55.3	259.12	2326	2326	2.13	107	176	63	24	4	5	3		0	323.31	0.82426	1.0066	17.553	341	0	Median	0.7797	0.98801	14.131	169	0	Median	0.88488
Tb927.11.5300	Tb927.11.5300	9	9	9	>Tb927.11.5300 | organism=Trypanosoma_brucei_TREU927 | product=kinesin, putative,mitotic centromere-associated kinesin, putative (Kif13-3) | location=Tb927_11_v5.1:1510715-1512415(+) | length=566 | sequence_SO=chromosome | SO=protein_coding	1.0071	0.955292	0.981196	0.0388558	1	9	9	9	7	8	7	8	7	8	24.7	24.7	24.7	62.524	566	566	4.78				15		7		1	0	41.562	0.88499	1.0372	12.901	22	0	Median	0.79528	1.0071	9.8335	11	0	Median	0.95359
Tb927.3.3560	Tb927.3.3560	29	29	29	>Tb927.3.3560 | organism=Trypanosoma_brucei_TREU927 | product=hypothetical protein, conserved | location=Tb927_03_v5.1:1001768-1003642(+) | length=624 | sequence_SO=chromosome | SO=protein_coding	0.98688	0.975515	0.981197	0.00852406	1	29	29	29	26	27	26	27	26	27	65.1	65.1	65.1	69.087	624	624	4.35		2	5	56	25			4	0	130.59	0.80624	0.9997	12.551	81	0	Median	0.78123	0.98688	11.151	45	0	Median	0.87596
Tb927.4.2530	Tb927.4.2530	4	4	4	>Tb927.4.2530 | organism=Trypanosoma_brucei_TREU927 | product=hypothetical protein, conserved | location=Tb927_04_v5.1:667668-668334(+) | length=158 | sequence_SO=chromosome | SO=protein_coding	0.89666	1.06594	0.981299	0.126959	1	4	4	4	4	3	4	3	4	3	25.3	25.3	25.3	16.835	158	158	7.62	1						1	19	0	96.623	0.75857	0.92163	12.87	17	0	Median	0.72099	0.89666	15.321	11	0	Median	0.82641
Tb927.8.3750	Tb927.8.3750	26	26	25	>Tb927.8.3750 | organism=Trypanosoma_brucei_TREU927 | product=nucleolar protein, putative | location=Tb927_08_v5.1:1120185-1121636(-) | length=483 | sequence_SO=chromosome | SO=protein_coding	0.97864	0.984155	0.981398	0.00413633	1	26	26	25	24	23	24	23	23	23	69.8	69.8	69.8	54.358	483	483	5.11	1				58	3	1	2	0	163.97	0.80763	0.99841	15.445	49	0	Median	0.75245	0.97864	11.143	27	0	Median	0.90407
Tb927.9.5840;Tb927.9.5750	Tb927.9.5840;Tb927.9.5750	22;22	22;22	22;22	>Tb927.9.5840 | organism=Trypanosoma_brucei_TREU927 | product=unspecified product (TRYP1) | location=Tb927_09_v5.1:989953-990552(+) | length=199 | sequence_SO=chromosome | SO=protein_coding;>Tb927.9.5750 | organism=Trypanosoma_brucei_TREU927 | product=unsp	0.97449	0.988338	0.981414	0.0103857	2	22	22	22	22	18	22	18	22	18	79.4	79.4	79.4	22.424	199	199;199	6.43	3	3	3	5	3	10	71	13	0	211.99	0.81098	0.99715	10.941	97	0	Median	0.76278	0.97449	11.003	57	0	Median	0.86929
Tb927.10.2370	Tb927.10.2370	12	12	12	>Tb927.10.2370 | organism=Trypanosoma_brucei_TREU927 | product=RNA-binding protein, putative (LA) | location=Tb927_10_v5.1:607374-608381(+) | length=335 | sequence_SO=chromosome | SO=protein_coding	0.95909	1.00392	0.981503	0.033619	1	12	12	12	12	9	12	9	12	9	48.1	48.1	48.1	37.659	335	335	6.56					1	19	11	5	0	62.001	0.79041	0.98276	15.179	31	0	Median	0.74435	0.95909	12.68	19	0	Median	0.8436
Tb927.10.13860	Tb927.10.13860	11	11	11	>Tb927.10.13860 | organism=Trypanosoma_brucei_TREU927 | product=GPI-anchor transamidase subunit 8 (GPI8) | location=Tb927_10_v5.1:3382544-3383503(-) | length=319 | sequence_SO=chromosome | SO=protein_coding	0.97428	0.988924	0.981602	0.010983	1	11	11	11	8	8	8	8	8	8	51.7	51.7	51.7	36.798	319	319	4.09		6	7			6	3		0	26.565	0.8047	0.99873	17.413	21	0	Median	0.78621	0.97428	10.757	9	0	Median	0.9069
Tb927.5.3030	Tb927.5.3030	67	67	67	>Tb927.5.3030 | organism=Trypanosoma_brucei_TREU927 | product=intraflagellar transport protein IFT122, putative (IFT122B) | location=Tb927_05_v5.1:1005325-1009107(+) | length=1260 | sequence_SO=chromosome | SO=protein_coding	1.0014	0.961816	0.981608	0.0296881	1	67	67	67	65	48	65	48	65	48	63.2	63.2	63.2	140.63	1260	1260	2.15		145	10	4				1	0	323.31	0.81236	1.0136	13.964	133	0	Median	0.79589	1.0014	9.681	82	0	Median	0.91618
Tb927.11.16810	Tb927.11.16810	9	9	9	>Tb927.11.16810 | organism=Trypanosoma_brucei_TREU927 | product=dynein light intermediate chain D1bLIC, putative | location=Tb927_11_v5.1:4474048-4475304(-) | length=418 | sequence_SO=chromosome | SO=protein_coding	1.0664	0.897263	0.981832	0.126852	1	9	9	9	9	4	9	4	9	4	25.6	25.6	25.6	45.168	418	418	5.27					16	6			0	49.666	0.91539	1.086	16.98	19	0	Median	0.8251	1.0664	18.928	13	0	Median	0.96231
Tb927.11.1990	Tb927.11.1990	42	42	42	>Tb927.11.1990 | organism=Trypanosoma_brucei_TREU927 | product=arginyl-tRNA synthetase, putative | location=Tb927_11_v5.1:578169-580528(+) | length=692 | sequence_SO=chromosome | SO=protein_coding	0.94699	1.01667	0.981832	0.0522626	1	42	42	42	32	32	32	32	32	32	69.4	69.4	69.4	78.432	692	692	3.89			9	71					0	139	0.77562	0.95512	15.804	69	0	Median	0.73269	0.94699	13.101	38	0	Median	0.84721
Tb927.10.14010	Tb927.10.14010	10	10	10	>Tb927.10.14010 | organism=Trypanosoma_brucei_TREU927 | product=hypothetical protein, conserved | location=Tb927_10_v5.1:3413886-3415277(-) | length=463 | sequence_SO=chromosome | SO=protein_coding	1.1162	0.847673	0.981937	0.201395	1	10	10	10	8	6	8	6	8	6	33.9	33.9	33.9	50.631	463	463	5.06				1	14	2			0	22.327	0.91313	1.1162	16.795	16	0	Median	0.86742	1.1162	17.238	10	0	Median	1.0388
Tb927.7.2300	Tb927.7.2300	28	28	28	>Tb927.7.2300 | organism=Trypanosoma_brucei_TREU927 | product=Nucleoporin (TbNup132) | location=Tb927_07_v5.1:590215-593826(-) | length=1203 | sequence_SO=chromosome | SO=protein_coding	1.0087	0.955201	0.981951	0.0401242	1	28	28	28	25	18	25	18	25	18	38.5	38.5	38.5	132.36	1203	1203	2.13	1	48	2	3					0	114.35	0.83456	1.0158	17.011	46	0	Median	0.8044	1.0087	12.255	28	0	Median	0.93968
Tb927.10.9890;Tb11.v5.0458	Tb927.10.9890	23;4	23;4	23;4	>Tb927.10.9890 | organism=Trypanosoma_brucei_TREU927 | product=hypothetical protein, conserved | location=Tb927_10_v5.1:2442363-2444978(+) | length=871 | sequence_SO=chromosome | SO=protein_coding	0.99572	0.968242	0.981981	0.0206087	2	23	23	23	20	20	20	20	20	20	37.9	37.9	37.9	97.192	871	871;209	3			43						0	151.11	0.85983	1.0059	15.073	41	0	Median	0.79118	0.99572	12.151	21	0	Median	0.92201
Tb927.6.1500	Tb927.6.1500	18	18	18	>Tb927.6.1500 | organism=Trypanosoma_brucei_TREU927 | product=alkyl-dihydroxyacetone phosphate synthase (DHAP) | location=Tb927_06_v5.1:524852-526693(-) | length=613 | sequence_SO=chromosome | SO=protein_coding	1.037	0.9273	0.98215	0.0822752	1	18	18	18	17	12	17	12	17	12	46.3	46.3	46.3	69.067	613	613	4				30					0	32.48	0.86044	1.0448	8.8062	22	0	Median	0.80973	1.037	10.763	12	0	Median	0.95722
Tb927.3.1010	Tb927.3.1010	29	29	29	>Tb927.3.1010 | organism=Trypanosoma_brucei_TREU927 | product=hypothetical protein, conserved | location=Tb927_03_v5.1:246909-248711(+) | length=600 | sequence_SO=chromosome | SO=protein_coding	0.99089	0.973615	0.982253	0.0129562	1	29	29	29	21	27	21	27	21	27	61.2	61.2	61.2	64.339	600	600	4.36		4	56	28	11	21	12	6	0	236.01	0.84316	1.0179	16.696	120	0	Median	0.79588	0.99089	11.846	66	0	Median	0.91461
Tb927.6.3670	Tb927.6.3670	19	19	19	>Tb927.6.3670 | organism=Trypanosoma_brucei_TREU927 | product=paraflagellar rod component, putative (PFC8) | location=Tb927_06_v5.1:1090477-1100145(-) | length=3222 | sequence_SO=chromosome | SO=protein_coding	0.97418	0.990589	0.982385	0.0123071	1	19	19	19	12	14	12	14	12	14	9.1	9.1	9.1	359.21	3222	3222	1.79	9	23	2						0	54.776	0.84769	0.98754	17.207	25	0	Median	0.79793	0.97418	19.39	12	0	Median	0.86582
Tb927.10.7230;Tb11.v5.0615	Tb927.10.7230	77;21	77;21	77;21	>Tb927.10.7230 | organism=Trypanosoma_brucei_TREU927 | product=hypothetical protein, conserved | location=Tb927_10_v5.1:1818867-1826432(-) | length=2521 | sequence_SO=chromosome | SO=protein_coding	1.0042	0.960707	0.982454	0.0326197	2	77	77	77	66	65	66	65	66	65	42	42	42	284.7	2521	2521;677	1.74	92	108	18	6	1				0	323.31	0.86548	1.0239	17.736	185	0	Median	0.80213	1.0042	18.957	90	0	Median	0.89554
Tb927.9.9580	Tb927.9.9580	4	4	4	>Tb927.9.9580 | organism=Trypanosoma_brucei_TREU927 | product=tubulin tyrosine ligase protein, putative | location=Tb927_09_v5.1:1523120-1525093(-) | length=657 | sequence_SO=chromosome | SO=protein_coding	0.90127	1.0638	0.982533	0.121894	1	4	4	4	3	3	3	3	3	3	10.5	10.5	10.5	74.09	657	657	4				6					0	2.5983	0.79248	0.92044	11.829	4	0	Median	0.73146	0.90127	14.482	3	0	Median	0.85857
Tb927.6.4970	Tb927.6.4970	12	12	12	>Tb927.6.4970 | organism=Trypanosoma_brucei_TREU927 | product=serine/arginine-rich protein specific kinase SRPK, putative,protein kinase, putative | location=Tb927_06_v5.1:1367566-1369737(+) | length=723 | sequence_SO=chromosome | SO=protein_coding	0.89749	1.0676	0.982545	0.127583	1	12	12	12	6	10	6	10	6	10	25.6	25.6	25.6	82.679	723	723	3.1			18	2					0	85.364	0.80582	0.93668	18.327	19	0	Median	0.69518	0.89749	17.524	6	0	Median	0.84178
Tb927.4.750;Tb927.3.2250	Tb927.4.750	7;1	7;1	7;1	>Tb927.4.750 | organism=Trypanosoma_brucei_TREU927 | product=50S ribosomal protein L7Ae, putative | location=Tb927_04_v5.1:207302-207739(-) | length=145 | sequence_SO=chromosome | SO=protein_coding	0.98232	0.982801	0.98256	0.000360737	2	7	7	7	7	3	7	3	7	3	45.5	45.5	45.5	16.32	145	145;298	7.86							2	12	0	31.889	0.78658	0.98663	14.947	11	0	Median	0.7566	0.98232	11.577	6	0	Median	0.84877
Tb927.10.2260	Tb927.10.2260	4	4	3	>Tb927.10.2260 | organism=Trypanosoma_brucei_TREU927 | product=hypothetical protein, conserved | location=Tb927_10_v5.1:584741-587095(+) | length=784 | sequence_SO=chromosome | SO=protein_coding	0.97905	0.986291	0.98267	0.00543042	1	4	4	3	2	2	2	2	2	1	6.8	6.8	5.9	86.188	784	784	4			3				1		0	6.2563	0.71567	0.8131	21.913	3	0	Median	0.75171	0.97905	26.266	2	0	Median	0.91578
Tb927.9.5730	Tb927.9.5730	10	10	10	>Tb927.9.5730 | organism=Trypanosoma_brucei_TREU927 | product=nucleosome assembly protein-like protein | location=Tb927_09_v5.1:985400-986668(+) | length=422 | sequence_SO=chromosome | SO=protein_coding	0.96967	0.995718	0.982694	0.0195363	1	10	10	10	9	7	9	7	9	7	29.6	29.6	29.6	47.584	422	422	5.09					20	2			0	23.365	0.84656	0.99701	22.706	19	0	Median	0.75528	0.96967	29.572	10	0	Median	0.87442
Tb927.11.3240	Tb927.11.3240	30	30	30	>Tb927.11.3240 | organism=Trypanosoma_brucei_TREU927 | product=T-complex protein 1, zeta subunit, putative (TCP-1-zeta) | location=Tb927_11_v5.1:925327-926961(+) | length=544 | sequence_SO=chromosome | SO=protein_coding	0.97772	0.987849	0.982785	0.00759709	1	30	30	30	26	29	26	29	26	29	65.8	65.8	65.8	59.579	544	544	5				73	22	18	20	5	0	166.64	0.8167	0.99024	12.013	123	0	Median	0.76198	0.97772	13.723	69	0	Median	0.85867
Tb927.9.13320	Tb927.9.13320	10	10	10	>Tb927.9.13320 | organism=Trypanosoma_brucei_TREU927 | product=hypothetical protein, conserved | location=Tb927_09_v5.1:2099368-2100897(-) | length=507 | sequence_SO=chromosome | SO=protein_coding	0.88862	1.07726	0.982941	0.141481	1	10	10	10	8	7	8	7	8	7	28	28	28	55.399	507	507	4				17					0	20.856	0.75217	0.90964	14.867	15	0	Median	0.69964	0.88862	16.216	9	0	Median	0.85013
Tb927.2.1120;Tb11.0820;Tb11.v5.0295	Tb927.2.1120	21;10;9	4;1;1	3;1;1	>Tb927.2.1120 | organism=Trypanosoma_brucei_TREU927 | product=retrotransposon hot spot protein (RHS, pseudogene), putative,retrotransposon hot spot protein 4 (RHS4), point mutation | location=Tb927_02_v5.1:190725-192860(-) | length=711 | sequence_SO=chromo	0.98164	0.984252	0.982946	0.00195898	3	21	4	3	16	18	2	4	2	3	28.8	9	6.2	80.856	711	711;803;409	3.14			6	1					0	79.034	0.84801	1.016	9.0931	5	0	Median	0.77041	0.98164	12.14	2	2	Median	0.84801
Tb927.5.2530	Tb927.5.2530	22	22	22	>Tb927.5.2530 | organism=Trypanosoma_brucei_TREU927 | product=hypothetical protein, conserved | location=Tb927_05_v5.1:874561-877680(+) | length=1039 | sequence_SO=chromosome | SO=protein_coding	0.9317	1.03427	0.982983	0.0769239	1	22	22	22	15	17	15	17	15	17	29.1	29.1	29.1	114.91	1039	1039	2.74		10	23	1					0	73.683	0.78614	0.94463	12.671	32	0	Median	0.7255	0.9317	14.015	16	0	Median	0.85594
Tb927.10.2490	Tb927.10.2490	20	20	20	>Tb927.10.2490 | organism=Trypanosoma_brucei_TREU927 | product=glucose-6-phosphate 1-dehydrogenase (G6PD) | location=Tb927_10_v5.1:648370-650046(+) | length=558 | sequence_SO=chromosome | SO=protein_coding	1.0235	0.942507	0.983004	0.0607447	1	20	20	20	17	15	17	15	17	15	53.8	53.8	53.8	63.503	558	558	4.38				35			5		0	56.257	0.84489	1.0294	13.484	35	0	Median	0.81229	1.0235	12.862	18	0	Median	0.94243
Tb927.9.9810	Tb927.9.9810	3	3	3	>Tb927.9.9810 | organism=Trypanosoma_brucei_TREU927 | product=hypothetical protein, conserved | location=Tb927_09_v5.1:1556919-1557377(-) | length=152 | sequence_SO=chromosome | SO=protein_coding	0.98588	0.9802	0.98304	0.00426003	1	3	3	3	3	1	3	1	3	1	19.7	19.7	19.7	16.882	152	152	8								7	0	6.3039	0.83134	1.0526	10.024	4	0	Median	0.78817	0.98588	8.6012	3	0	Median	0.85254
Tb927.9.8990	Tb927.9.8990	11	11	11	>Tb927.9.8990 | organism=Trypanosoma_brucei_TREU927 | product=hypothetical protein, conserved | location=Tb927_09_v5.1:1439387-1440424(-) | length=345 | sequence_SO=chromosome | SO=protein_coding	0.94228	1.02383	0.983057	0.0611662	1	11	11	11	10	9	10	9	10	9	43.5	43.5	43.5	38.856	345	345	6.04						24	1		0	108.9	0.8146	0.96733	8.4627	21	0	Median	0.73792	0.94228	9.7453	12	0	Median	0.86295
Tb927.11.13300	Tb927.11.13300	3	3	3	>Tb927.11.13300 | organism=Trypanosoma_brucei_TREU927 | product=hypothetical protein, conserved | location=Tb927_11_v5.1:3564685-3565155(-) | length=156 | sequence_SO=chromosome | SO=protein_coding	1.012	0.954381	0.98319	0.0432145	1	3	3	3	3	2	3	2	3	2	31.4	31.4	31.4	16.922	156	156	6.12	2						1	5	0	21.874	0.87318	1.0297	10.358	8	0	Median	0.79957	1.012	12.692	5	0	Median	0.91591
Tb927.9.10530	Tb927.9.10530	16	16	16	>Tb927.9.10530 | organism=Trypanosoma_brucei_TREU927 | product=hypothetical protein, conserved | location=Tb927_09_v5.1:1652019-1655150(-) | length=1043 | sequence_SO=chromosome | SO=protein_coding	0.99423	0.972195	0.983213	0.0165261	1	16	16	16	15	6	15	6	15	6	18.4	18.4	18.4	118.72	1043	1043	2.14		20			1				0	29.915	0.86618	1.0081	21.185	18	0	Median	0.80401	0.99423	23.744	14	0	Median	0.92427
Tb927.11.7350	Tb927.11.7350	10	10	10	>Tb927.11.7350 | organism=Trypanosoma_brucei_TREU927 | product=histone H2B variant, putative (H2BVAR) | location=Tb927_11_v5.1:2071522-2071953(+) | length=143 | sequence_SO=chromosome | SO=protein_coding	0.9875	0.979048	0.983274	0.00633873	1	10	10	10	10	6	10	6	10	6	58	58	58	15.786	143	143	7.28							23	9	0	38.995	0.77918	1.0012	9.1921	26	0	Median	0.76619	0.9875	9.4316	22	0	Median	0.84166
Tb927.3.5310	Tb927.3.5310	10	10	10	>Tb927.3.5310 | organism=Trypanosoma_brucei_TREU927 | product=paraflagellar rod protein | location=Tb927_03_v5.1:1488667-1495053(+) | length=2128 | sequence_SO=chromosome | SO=protein_coding	1.0741	0.892698	0.983399	0.136052	1	10	10	10	2	10	2	10	2	10	19.8	19.8	19.8	242.78	2128	2128	2.15	4	8						1	0	29.078	0.9517	1.0786	13.451	9	0	Median	0.86042	1.0741	0.59439	2	0	Median	1.0057
Tb927.5.3810	Tb927.5.3810	19	19	19	>Tb927.5.3810 | organism=Trypanosoma_brucei_TREU927 | product=orotidine-5-phosphate decarboxylase/orotate phosphoribosyltransferase, putative,OMPDCase-OPRTase, putative | location=Tb927_05_v5.1:1246263-1247652(+) | length=458 | sequence_SO=chromosome | SO=	0.90538	1.06145	0.983414	0.11705	1	19	19	19	14	17	14	17	14	17	49.3	49.3	49.3	49.955	458	458	4.93	2				35	5			0	99.262	0.77338	0.91811	13.715	37	0	Median	0.70489	0.90538	14.799	21	0	Median	0.85397
Tb927.11.14250	Tb927.11.14250	37	37	37	>Tb927.11.14250 | organism=Trypanosoma_brucei_TREU927 | product=T-complex protein 1, epsilon subunit, putative (TCP-1-epsilon) | location=Tb927_11_v5.1:3793465-3795081(+) | length=538 | sequence_SO=chromosome | SO=protein_coding	0.97095	0.996214	0.983582	0.0189483	1	37	37	37	35	35	35	35	35	35	73.6	73.6	73.6	59.381	538	538	4.49	1			95	11	7	8	4	0	201.83	0.81095	0.99771	15.115	112	0	Median	0.76842	0.97095	16.686	57	0	Median	0.85968
Tb927.10.15290;Tb11.v5.0628	Tb927.10.15290	12;4	12;4	12;4	>Tb927.10.15290 | organism=Trypanosoma_brucei_TREU927 | product=hypothetical protein, conserved | location=Tb927_10_v5.1:3731385-3736322(+) | length=1645 | sequence_SO=chromosome | SO=protein_coding	0.94384	1.02353	0.983685	0.0597682	2	12	12	12	7	11	7	11	7	11	10.1	10.1	10.1	178.49	1645	1645;604	1.9	2	18							0	35.093	0.80335	0.95484	16.829	14	0	Median	0.77843	0.94384	21.707	6	0	Median	0.84467
Tb927.9.1880	Tb927.9.1880	12	12	12	>Tb927.9.1880 | organism=Trypanosoma_brucei_TREU927 | product=hypothetical protein, conserved | location=Tb927_09_v5.1:428610-430319(-) | length=569 | sequence_SO=chromosome | SO=protein_coding	1.0835	0.883939	0.983719	0.149671	1	12	12	12	11	9	11	9	11	9	35.1	35.1	35.1	63.117	569	569	4.1				19		1			0	40.655	0.92387	1.1084	11.004	20	0	Median	0.8601	1.0835	12.889	11	0	Median	1.0014
Tb927.10.7200	Tb927.10.7200	12	12	12	>Tb927.10.7200 | organism=Trypanosoma_brucei_TREU927 | product=hypothetical protein, conserved | location=Tb927_10_v5.1:1810790-1813330(-) | length=846 | sequence_SO=chromosome | SO=protein_coding	1.036	0.931446	0.983723	0.0784158	1	12	12	12	9	7	9	7	9	7	14.4	14.4	14.4	93.195	846	846	3			17						0	26.313	0.81707	1.0583	32.241	13	0	Median	0.80936	1.036	38.079	8	0	Median	0.9756
Tb927.10.15520;Tb11.v5.0812	Tb927.10.15520;Tb11.v5.0812	12;6	12;6	12;6	>Tb927.10.15520 | organism=Trypanosoma_brucei_TREU927 | product=signal recognition particle protein, putative | location=Tb927_10_v5.1:3807791-3809821(+) | length=676 | sequence_SO=chromosome | SO=protein_coding;>Tb11.v5.0812 | organism=Trypanosoma_brucei_	0.97033	0.997307	0.983819	0.020233	2	12	12	12	11	7	11	7	11	7	22.9	22.9	22.9	76.262	676	676;340	4.05				19	1				0	38.964	0.78458	0.97548	16.808	18	0	Median	0.76263	0.97033	16.692	12	0	Median	0.82946
Tb927.11.15420	Tb927.11.15420	11	11	11	>Tb927.11.15420 | organism=Trypanosoma_brucei_TREU927 | product=hypothetical protein, conserved | location=Tb927_11_v5.1:4095426-4096043(-) | length=205 | sequence_SO=chromosome | SO=protein_coding	0.90093	1.06678	0.983855	0.124388	1	11	11	11	10	10	10	10	10	10	52.2	52.2	52.2	23.057	205	205	6.9				1	1		26	2	0	122.94	0.75094	0.9335	10.122	25	0	Median	0.69782	0.90093	12.214	14	0	Median	0.7822
Tb927.9.12650;Tb11.v5.0675	Tb927.9.12650	84;16	84;16	84;16	>Tb927.9.12650 | organism=Trypanosoma_brucei_TREU927 | product=ubiquitin-activating enzyme E1, putative (UBA2) | location=Tb927_09_v5.1:1986043-1989687(+) | length=1214 | sequence_SO=chromosome | SO=protein_coding	0.9851	0.982704	0.983902	0.0017967	2	84	84	84	84	66	84	66	84	66	72.4	72.4	72.4	134.65	1214	1214;331	3.01	14	243	99	53	19	19	10	18	0	323.31	0.80853	0.99958	16.267	437	0	Median	0.77787	0.9851	11.674	237	0	Median	0.88275
Tb927.4.1920	Tb927.4.1920	19	19	19	>Tb927.4.1920 | organism=Trypanosoma_brucei_TREU927 | product=GPI transamidase, putative (TbGPI16) | location=Tb927_04_v5.1:487062-489796(-) | length=686 | sequence_SO=chromosome | SO=protein_coding	0.94251	1.02539	0.983949	0.062159	1	19	19	19	17	16	17	16	17	16	41.7	41.7	41.7	75.806	686	686	3.45		8	16	34					0	87.15	0.83145	0.96839	13.04	54	0	Median	0.72818	0.94251	14.435	24	0	Median	0.86216
Tb927.8.5600	Tb927.8.5600	13	13	13	>Tb927.8.5600 | organism=Trypanosoma_brucei_TREU927 | product=transaldolase, putative | location=Tb927_08_v5.1:1663004-1664002(+) | length=332 | sequence_SO=chromosome | SO=protein_coding	0.9841	0.983961	0.984031	0.000103928	1	13	13	13	10	10	10	10	10	10	53	53	53	36.627	332	332	6						21			0	37.543	0.81556	0.9927	13.666	15	0	Median	0.77853	0.9841	16.135	8	0	Median	0.91588
Tb927.7.650	Tb927.7.650	12	12	12	>Tb927.7.650 | organism=Trypanosoma_brucei_TREU927 | product=hypothetical protein, conserved | location=Tb927_07_v5.1:133410-136364(-) | length=984 | sequence_SO=chromosome | SO=protein_coding	0.96697	1.00112	0.984046	0.0256134	1	12	12	12	11	5	11	5	11	5	21.5	21.5	21.5	105.93	984	984	2		16							0	52.26	0.82234	0.96915	15.476	14	0	Median	0.78496	0.96697	16.05	10	0	Median	0.89503
Tb927.11.5600	Tb927.11.5600	6	6	6	>Tb927.11.5600 | organism=Trypanosoma_brucei_TREU927 | product=hypothetical protein, conserved | location=Tb927_11_v5.1:1585675-1586034(+) | length=119 | sequence_SO=chromosome | SO=protein_coding	0.93627	1.03203	0.984152	0.0718233	1	6	6	6	5	4	5	4	5	4	52.9	52.9	52.9	13.577	119	119	8								11	0	28.866	0.83546	0.94507	14.211	11	0	Median	0.73544	0.93627	18.315	6	0	Median	0.87047
Tb927.8.2000	Tb927.8.2000	10	9	9	>Tb927.8.2000 | organism=Trypanosoma_brucei_TREU927 | product=cyclophilin, putative (NCP1) | location=Tb927_08_v5.1:635332-636120(+) | length=262 | sequence_SO=chromosome | SO=protein_coding	0.91025	1.05816	0.984203	0.11093	1	10	9	9	9	7	8	6	8	6	42.7	40.1	40.1	28.482	262	262	6.86						7	10	4	0	49.274	0.75853	0.91895	16.635	18	0	Median	0.7202	0.91025	11.525	9	0	Median	0.81196
Tb927.11.11290	Tb927.11.11290	23	12	12	>Tb927.11.11290 | organism=Trypanosoma_brucei_TREU927 | product=heat shock protein 70, putative | location=Tb927_11_v5.1:3020888-3022918(+) | length=676 | sequence_SO=chromosome | SO=protein_coding	1.0622	0.906208	0.984204	0.116994	1	23	12	12	19	22	8	11	8	11	43.9	29.7	29.7	73.63	676	676	4				19					0	31.249	0.84105	1.0756	13.022	17	0	Median	0.83545	1.0622	12.591	6	0	Median	0.91574
Tb927.6.2550	Tb927.6.2550	15	15	15	>Tb927.6.2550 | organism=Trypanosoma_brucei_TREU927 | product=RNA-binding protein, putative (TRRM2) | location=Tb927_06_v5.1:771730-773933(+) | length=724 | sequence_SO=chromosome | SO=protein_coding	1.0062	0.962371	0.984286	0.0328715	1	15	15	15	10	11	10	11	10	11	33.3	33.3	33.3	79.849	724	724	4.34			10	14		4	3	1	0	52.496	0.84571	1.0187	19.88	28	0	Median	0.79007	1.0062	13.992	12	0	Median	0.92032
Tb927.11.13230	Tb927.11.13230	15	15	15	>Tb927.11.13230 | organism=Trypanosoma_brucei_TREU927 | product=hypothetical protein, conserved | location=Tb927_11_v5.1:3548093-3548743(-) | length=216 | sequence_SO=chromosome | SO=protein_coding	1.0173	0.951384	0.984342	0.0494368	1	15	15	15	15	12	15	12	15	12	66.2	66.2	66.2	23.909	216	216	7.38						7	24	30	0	114.52	0.84914	1.0452	13.528	54	0	Median	0.81099	1.0173	10.48	27	0	Median	0.93436
Tb927.10.2810	Tb927.10.2810	10	10	10	>Tb927.10.2810 | organism=Trypanosoma_brucei_TREU927 | product=hypothetical protein, conserved | location=Tb927_10_v5.1:721079-722095(+) | length=338 | sequence_SO=chromosome | SO=protein_coding	1.0612	0.907606	0.984403	0.115196	1	10	10	10	7	6	7	6	7	6	36.7	36.7	36.7	38.589	338	338	6						15			0	37.786	0.89697	1.0813	9.4647	12	0	Median	0.85487	1.0612	10.818	7	0	Median	0.94052
Tb927.11.3490	Tb927.11.3490	25	25	25	>Tb927.11.3490 | organism=Trypanosoma_brucei_TREU927 | product=hypothetical protein, conserved | location=Tb927_11_v5.1:1032022-1034418(+) | length=798 | sequence_SO=chromosome | SO=protein_coding	0.95784	1.01113	0.984486	0.0399694	1	25	25	25	18	22	18	22	18	22	43.6	43.6	43.6	87.8	798	798	4.1			38	3	6	10	2	3	0	158.72	0.79772	0.96303	17.2	54	0	Median	0.75167	0.95784	13.284	25	0	Median	0.87917
Tb927.5.1630	Tb927.5.1630	6	6	6	>Tb927.5.1630 | organism=Trypanosoma_brucei_TREU927 | product=hypothetical protein, conserved | location=Tb927_05_v5.1:570736-571215(+) | length=159 | sequence_SO=chromosome | SO=protein_coding	0.93298	1.036	0.984491	0.0772658	1	6	6	6	6	5	6	5	6	5	42.1	42.1	42.1	17.683	159	159	8								11	0	53.434	0.77758	0.96413	19.554	11	0	Median	0.74007	0.93298	5.4894	6	0	Median	0.86441
Tb927.7.4500;Tb11.v5.0263	Tb927.7.4500;Tb11.v5.0263	26;26	26;26	26;26	>Tb927.7.4500 | organism=Trypanosoma_brucei_TREU927 | product=hypothetical protein, conserved | location=Tb927_07_v5.1:1198019-1199605(-) | length=528 | sequence_SO=chromosome | SO=protein_coding;>Tb11.v5.0263 | organism=Trypanosoma_brucei_TREU927 | produc	0.97545	0.993838	0.984644	0.0137912	2	26	26	26	26	22	26	22	26	22	63.3	63.3	63.3	58.428	528	528;528	5.2		1		43	27	23	20	2	0	96.528	0.80417	0.99438	13.616	108	0	Median	0.76532	0.97545	10.83	62	0	Median	0.86401
Tb927.11.11900	Tb927.11.11900	38	38	38	>Tb927.11.11900 | organism=Trypanosoma_brucei_TREU927 | product=coatomer gamma subunit, putative,cytosolic coat protein, putative (TbCoatomerGamma) | location=Tb927_11_v5.1:3188010-3190646(+) | length=878 | sequence_SO=chromosome | SO=protein_coding	1.0032	0.96609	0.984645	0.0278323	1	38	38	38	30	32	30	32	30	32	57.4	57.4	57.4	97.586	878	878	3.24		2	66	17	3				0	192.78	0.84927	1.0238	13.875	81	0	Median	0.79362	1.0032	13.698	34	0	Median	0.90943
Tb927.11.6370	Tb927.11.6370	29	29	29	>Tb927.11.6370 | organism=Trypanosoma_brucei_TREU927 | product=leucine-rich repeat protein (LRRP), putative | location=Tb927_11_v5.1:1790570-1793209(-) | length=879 | sequence_SO=chromosome | SO=protein_coding	0.99771	0.971723	0.984716	0.0194904	1	29	29	29	22	27	22	27	22	27	49.9	49.9	49.9	95.767	879	879	3.15		1	51	10					0	163.23	0.86053	1.024	14.879	53	0	Median	0.79425	0.99771	11.833	22	0	Median	0.89992
Tb927.2.6050	Tb927.2.6050	23	23	23	>Tb927.2.6050 | organism=Trypanosoma_brucei_TREU927 | product=beta prime COP protein | location=Tb927_02_v5.1:1092946-1095501(+) | length=851 | sequence_SO=chromosome | SO=protein_coding	1.022	0.947777	0.984889	0.0556669	1	23	23	23	23	18	23	18	23	18	37.8	37.8	37.8	94.051	851	851	3.28			38	15					0	93.461	0.83295	1.0271	18.832	42	0	Median	0.80609	1.022	19.504	22	0	Median	0.92985
Tb927.5.3800	Tb927.5.3800	63	63	63	>Tb927.5.3800 | organism=Trypanosoma_brucei_TREU927 | product=glutamine hydrolysing (not ammonia-dependent) carbomoyl phosphate synthase, putative | location=Tb927_05_v5.1:1238877-1244378(+) | length=1833 | sequence_SO=chromosome | SO=protein_coding	0.93068	1.03916	0.984918	0.0813565	1	63	63	63	37	59	37	59	37	59	49.3	49.3	49.3	204.09	1833	1833	2.18	30	93	38	7		2			0	323.31	0.80411	0.95449	13.654	150	0	Median	0.74025	0.93068	15.296	72	0	Median	0.85183
Tb927.9.4900	Tb927.9.4900	20	20	20	>Tb927.9.4900 | organism=Trypanosoma_brucei_TREU927 | product=condensin subunit 1, putative | location=Tb927_09_v5.1:887922-891698(+) | length=1258 | sequence_SO=chromosome | SO=protein_coding	0.97599	0.994036	0.985013	0.0135343	1	20	20	20	17	13	17	13	17	13	22.8	22.8	22.8	141.11	1258	1258	2.03		30	1						0	90.114	0.81741	1.0019	7.3478	25	0	Median	0.78012	0.97599	7.0818	15	0	Median	0.86218
Tb927.9.4680	Tb927.9.4680	25	25	25	>Tb927.9.4680 | organism=Trypanosoma_brucei_TREU927 | product=ATP-dependent DEAD box helicase, putative | location=Tb927_09_v5.1:864680-865894(+) | length=404 | sequence_SO=chromosome | SO=protein_coding	0.96887	1.00118	0.985026	0.0242335	1	25	25	25	22	23	22	23	22	23	72.5	72.5	72.5	45.361	404	404	5.99	3	2	2	8	48	57	32	30	0	301.12	0.80256	0.98301	15.478	156	0	Median	0.76313	0.96887	17.068	76	0	Median	0.87097
Tb927.10.1450	Tb927.10.1450	9	9	9	>Tb927.10.1450 | organism=Trypanosoma_brucei_TREU927 | product=hypothetical protein, conserved | location=Tb927_10_v5.1:376955-385573(-) | length=2872 | sequence_SO=chromosome | SO=protein_coding	0.95036	1.01978	0.985072	0.0520679	1	9	9	9	9	8	9	8	9	8	39.3	39.3	39.3	329.64	2872	2872	1.56	24	13	2	2					0	106.13	0.81198	0.96071	14.897	32	0	Median	0.76591	0.95036	12.342	14	0	Median	0.86714
Tb927.6.3500	Tb927.6.3500	86	86	86	>Tb927.6.3500 | organism=Trypanosoma_brucei_TREU927 | product=endosomal trafficking protein RME-8, putative | location=Tb927_06_v5.1:1037807-1044517(-) | length=2236 | sequence_SO=chromosome | SO=protein_coding	0.99421	0.976086	0.985148	0.0135931	1	86	86	86	66	74	66	74	66	74	47.9	47.9	47.9	253.87	2236	2236	1.68	123	116	21	8					0	323.31	0.84445	1.0157	15.366	223	0	Median	0.79853	0.99421	14.839	105	0	Median	0.88775
Tb11.v5.0624	Tb11.v5.0624	22	11	1	>Tb11.v5.0624 | organism=Trypanosoma_brucei_TREU927 | product=retrotransposon hot spot protein (PHS), putative | location=Tb927_11_bin_v5.1:3001423-3003057(-) | length=544 | sequence_SO=random_sequence | SO=protein_coding	0.99085	0.97972	0.985285	0.00834765	1	22	11	1	17	19	9	9	0	1	39.3	24.1	2.4	62.492	544	544	3		1	27	1					0	210.91	0.8439	1.0181	16.179	24	0	Median	0.78824	0.99085	17.97	13	0	Median	0.88393
Tb927.8.5090;Tb11.v5.0723	Tb927.8.5090;Tb11.v5.0723	8;6	8;6	8;6	>Tb927.8.5090 | organism=Trypanosoma_brucei_TREU927 | product=DNA-directed RNA polymerase I largest subunit (RPA190) | location=Tb927_08_v5.1:1502733-1508078(+) | length=1781 | sequence_SO=chromosome | SO=protein_coding;>Tb11.v5.0723 | organism=Trypanosoma	0.88655	1.08413	0.985339	0.148184	2	8	8	8	5	6	5	6	5	6	8	8	8	195.95	1781	1781;757	1.92	1	11							0	14.634	0.76419	0.9224	22.928	9	0	Median	0.68352	0.88655	28.602	4	0	Median	0.81916
Tb927.10.840;Tb11.v5.0753	Tb927.10.840	23;8	23;8	23;8	>Tb927.10.840 | organism=Trypanosoma_brucei_TREU927 | product=hypothetical protein, conserved | location=Tb927_10_v5.1:218290-223449(+) | length=1719 | sequence_SO=chromosome | SO=protein_coding	0.99203	0.978761	0.985395	0.00995183	2	23	23	23	18	13	18	13	18	13	18.9	18.9	18.9	195.48	1719	1719;708	2.05	6	32	2	3					0	97.753	0.81235	1.0017	17.523	38	0	Median	0.76351	0.99203	15.104	24	0	Median	0.88779
Tb927.11.3570	Tb927.11.3570	57	57	57	>Tb927.11.3570 | organism=Trypanosoma_brucei_TREU927 | product=aminopeptidase, putative,metallo-peptidase, Clan MA(E) Family M1 | location=Tb927_11_v5.1:1057399-1060014(+) | length=871 | sequence_SO=chromosome | SO=protein_coding	0.97692	0.993937	0.985428	0.0127627	1	57	57	57	53	52	53	52	53	52	71.2	71.2	71.2	98.098	871	871	3.32			143	32	1	2	2	2	0	323.31	0.80694	0.9968	12.042	159	0	Median	0.76664	0.97692	11.975	78	0	Median	0.86147
Tb927.11.16540	Tb927.11.16540	7	7	7	>Tb927.11.16540 | organism=Trypanosoma_brucei_TREU927 | product=hypothetical protein, conserved | location=Tb927_11_v5.1:4381622-4381918(-) | length=98 | sequence_SO=chromosome | SO=protein_coding	0.9874	0.983478	0.985439	0.00294182	1	7	7	7	7	5	7	5	7	5	80.6	80.6	80.6	10.913	98	98	8								14	0	58.092	0.82833	1.0133	34.419	14	0	Median	0.77313	0.9874	45.187	8	0	Median	0.89881
Tb927.10.9650	Tb927.10.9650	39	39	10	>Tb927.10.9650 | organism=Trypanosoma_brucei_TREU927 | product=hypothetical protein, conserved | location=Tb927_10_v5.1:2377684-2381904(+) | length=1406 | sequence_SO=chromosome | SO=protein_coding	1.0008	0.97012	0.98546	0.0230098	1	39	39	10	37	22	37	22	10	4	39	39	8.9	152.97	1406	1406	2.08		60	3	1					0	145.8	0.84617	1.0039	13.542	50	0	Median	0.79727	1.0008	9.8455	30	0	Median	0.89387
Tb927.11.15680	Tb927.11.15680	9	9	9	>Tb927.11.15680 | organism=Trypanosoma_brucei_TREU927 | product=hypothetical protein, conserved | location=Tb927_11_v5.1:4154242-4154631(-) | length=129 | sequence_SO=chromosome | SO=protein_coding	0.95669	1.01432	0.985506	0.0432242	1	9	9	9	9	5	9	5	9	5	87.6	87.6	87.6	14.492	129	129	8								16	0	53.967	0.7942	0.96268	8.5991	16	0	Median	0.76865	0.95669	8.7057	11	0	Median	0.87888
Tb927.3.1030	Tb927.3.1030	8	8	8	>Tb927.3.1030 | organism=Trypanosoma_brucei_TREU927 | product=RNA-binding protein (RPB28) | location=Tb927_03_v5.1:253218-254291(+) | length=357 | sequence_SO=chromosome | SO=protein_coding	0.95428	1.01689	0.985585	0.0469579	1	8	8	8	6	5	6	5	6	5	31.4	31.4	31.4	39.272	357	357	7.12					2	1	7	7	0	33.434	0.76777	0.95428	21.613	16	0	Median	0.74866	0.95428	10.845	8	0	Median	0.85232
Tb927.3.4820	Tb927.3.4820	5	5	5	>Tb927.3.4820 | organism=Trypanosoma_brucei_TREU927 | product=acyltransferase, putative | location=Tb927_03_v5.1:1357253-1358170(-) | length=305 | sequence_SO=chromosome | SO=protein_coding	0.94604	1.02555	0.985793	0.0596298	1	5	5	5	5	4	5	4	5	4	22.3	22.3	22.3	34.629	305	305	6	1					10	1	2	0	33.658	0.77764	0.95008	16.577	12	0	Median	0.74433	0.94604	9.8567	8	0	Median	0.84968
Tb927.6.4020	Tb927.6.4020	6	6	6	>Tb927.6.4020 | organism=Trypanosoma_brucei_TREU927 | product=hypothetical protein, conserved | location=Tb927_06_v5.1:1176571-1176891(-) | length=106 | sequence_SO=chromosome | SO=protein_coding	1.0047	0.966931	0.985815	0.0283268	1	6	6	6	6	5	6	5	6	5	83	83	83	11.61	106	106	7.13						10		13	0	38.469	0.80851	1.0114	10.796	23	0	Median	0.78827	1.0047	12.727	14	0	Median	0.88267
Tb927.5.4460;Tb05.5K5.110;Tb11.v5.0866	Tb927.5.4460;Tb05.5K5.110	42;42;20	42;42;20	42;42;20	>Tb927.5.4460 | organism=Trypanosoma_brucei_TREU927 | product=major vault protein, putative (MVP) | location=Tb927_05_v5.1:1374493-1377380(-) | length=838 | sequence_SO=chromosome | SO=protein_coding;>Tb05.5K5.110 | organism=Trypanosoma_brucei_TREU927 | pr	0.96618	1.00556	0.98587	0.0295356	3	42	42	42	27	39	27	39	27	39	62.5	62.5	62.5	94.102	838	838;838;519	3.01		1	79	2					0	323.31	0.80489	0.98007	12.27	71	0	Median	0.75263	0.96618	14.264	33	0	Median	0.84489
Tb927.9.13380	Tb927.9.13380	28	28	28	>Tb927.9.13380 | organism=Trypanosoma_brucei_TREU927 | product=phosphoinositide-binding protein, putative | location=Tb927_09_v5.1:2120407-2121666(-) | length=419 | sequence_SO=chromosome | SO=protein_coding	0.99994	0.971817	0.985879	0.021092	1	28	28	28	26	22	26	22	26	22	72.1	72.1	72.1	48.172	419	419	6.13					55	22	29	21	0	292.6	0.83787	1.0061	14.807	95	0	Median	0.79161	0.99994	15.165	53	0	Median	0.91676
Tb10.v4.0052;Tb927.10.10360;Tb10.v4.0053	Tb10.v4.0052;Tb927.10.10360;Tb10.v4.0053	16;13;11	16;13;11	4;4;3	>Tb10.v4.0052 | organism=Trypanosoma_brucei_TREU927 | product=microtubule-associated protein 2,chrX additional, unordered contigs | location=Tp_ends-39g01.p1k:50-14692(-) | length=4880 | sequence_SO=contig | SO=protein_coding;>Tb927.10.10360 | organism=Try	0.9932	0.978569	0.985885	0.010973	3	16	16	4	16	12	16	12	4	3	89.8	89.8	39.5	561.21	4880	4880;3198;4119	4.06	34	41	37	28	19	19	22	28	0	115.31	0.8305	1.008	10.219	214	0	Median	0.78776	0.9932	10.333	117	0	Median	0.89465
Tb927.10.14140;Tb11.v5.0605	Tb927.10.14140;Tb11.v5.0605	38;36	38;36	38;36	>Tb927.10.14140 | organism=Trypanosoma_brucei_TREU927 | product=pyruvate kinase 1 (PYK1) | location=Tb927_10_v5.1:3434717-3436216(-) | length=499 | sequence_SO=chromosome | SO=protein_coding;>Tb11.v5.0605 | organism=Trypanosoma_brucei_TREU927 | product=pyr	0.91889	1.05298	0.985933	0.100564	2	38	38	38	37	37	37	37	37	37	84	84	84	54.423	499	499;458	5	31	33	26	50	181	65	63	45	0	323.31	0.7585	0.93201	12.559	447	0	Median	0.72572	0.91889	11.043	252	0	Median	0.82515
Tb11.v5.0162;Tb927.7.4790	Tb11.v5.0162;Tb927.7.4790	11;10	11;10	11;10	>Tb11.v5.0162 | organism=Trypanosoma_brucei_TREU927 | product=proteasome beta 6 subunit | location=Tb927_11_bin_v5.1:178762-179538(-) | length=258 | sequence_SO=random_sequence | SO=protein_coding;>Tb927.7.4790 | organism=Trypanosoma_brucei_TREU927 | produ	1.0008	0.971251	0.986025	0.0221618	2	11	11	11	10	8	10	8	10	8	56.2	56.2	56.2	28.705	258	258;258	7							22		0	78.097	0.88696	1.0291	12.788	17	0	Median	0.79885	1.0008	15.939	8	0	Median	0.90456
Tb927.11.11480	Tb927.11.11480	24	24	24	>Tb927.11.11480 | organism=Trypanosoma_brucei_TREU927 | product=Trichohyalin, putative | location=Tb927_11_v5.1:3075484-3077460(+) | length=658 | sequence_SO=chromosome | SO=protein_coding	0.98395	0.988142	0.986046	0.00314422	1	24	24	24	15	17	15	17	15	17	41.2	41.2	41.2	78.966	658	658	4.48		1	31	9	5	4	9	6	0	29.936	0.7998	0.99008	19.51	55	0	Median	0.76774	0.98395	11.013	29	0	Median	0.91442
Tb927.11.3850	Tb927.11.3850	7	7	7	>Tb927.11.3850 | organism=Trypanosoma_brucei_TREU927 | product=AMP deaminase, putative | location=Tb927_11_v5.1:1125684-1130360(+) | length=1558 | sequence_SO=chromosome | SO=protein_coding	0.96355	1.00869	0.986122	0.0338587	1	7	7	7	5	5	5	5	5	5	5	5	5	175.55	1558	1558	1.5	5	5							0	14.601	0.83017	0.96355	24.979	9	0	Median	0.76786	0.96355	26.304	5	0	Median	0.88786
Tb927.2.4710	Tb927.2.4710	18	18	18	>Tb927.2.4710 | organism=Trypanosoma_brucei_TREU927 | product=RNA-binding protein, putative (TRRM1) | location=Tb927_02_v5.1:833328-834653(-) | length=441 | sequence_SO=chromosome | SO=protein_coding	0.9751	0.997208	0.986154	0.0165809	1	18	18	18	15	13	15	13	15	13	38.5	38.5	38.5	49.983	441	441	5.31	1	2	1	16	25	11	3	11	0	131.58	0.80861	0.99441	13.202	66	0	Median	0.78547	0.9751	9.563	36	0	Median	0.89959
Tb927.11.4320	Tb927.11.4320	8	8	8	>Tb927.11.4320 | organism=Trypanosoma_brucei_TREU927 | product=hypothetical protein, conserved | location=Tb927_11_v5.1:1255369-1256796(-) | length=475 | sequence_SO=chromosome | SO=protein_coding	0.98223	0.990197	0.986214	0.00597529	1	8	8	8	6	3	6	3	6	3	27.8	27.8	27.8	51.878	475	475	4.7				3	7				0	15.293	0.83007	0.99597	10.308	8	0	Median	0.75149	0.98223	12.57	5	0	Median	0.8387
Tb927.11.4230	Tb927.11.4230	13	13	13	>Tb927.11.4230 | organism=Trypanosoma_brucei_TREU927 | product=hypothetical protein, conserved | location=Tb927_11_v5.1:1236953-1240558(-) | length=1201 | sequence_SO=chromosome | SO=protein_coding	0.98004	0.992654	0.986347	0.00946077	1	13	13	13	12	7	12	7	12	7	15.2	15.2	15.2	132.43	1201	1201	2		19							0	38.337	0.82464	0.98004	27.527	17	0	Median	0.79664	0.98004	16.98	11	0	Median	0.86108
Tb927.10.5300;Tb11.v5.0246	Tb927.10.5300;Tb11.v5.0246	11;11	11;11	11;11	>Tb927.10.5300 | organism=Trypanosoma_brucei_TREU927 | product=eukaryotic translation initiation factor 6 (eIF-6), putative | location=Tb927_10_v5.1:1324711-1325457(+) | length=248 | sequence_SO=chromosome | SO=protein_coding;>Tb11.v5.0246 | organism=Trypa	0.99254	0.9802	0.98637	0.00925503	2	11	11	11	10	6	10	6	10	6	60.1	60.1	60.1	26.925	248	248;248	7							17		0	107.24	0.81428	1.0061	7.5307	12	0	Median	0.78779	0.99254	8.4331	8	0	Median	0.90644
Tb927.4.3740	Tb927.4.3740	59	59	59	>Tb927.4.3740 | organism=Trypanosoma_brucei_TREU927 | product=flagellar attachment zone protein (FAZ1) | location=Tb927_04_v5.1:939823-946721(-) | length=1692 | sequence_SO=chromosome | SO=protein_coding	0.99946	0.973331	0.986395	0.0195969	1	59	59	59	51	55	51	55	51	55	68	68	68	192.57	1692	1692	2.08	100	89	61	25	2	1			0	323.31	0.82897	1.0108	15.497	240	0	Median	0.79616	0.99946	13.741	107	0	Median	0.8784
Tb927.10.8170	Tb927.10.8170	45	45	45	>Tb927.10.8170 | organism=Trypanosoma_brucei_TREU927 | product=nuclear pore complex protein (NUP155), putative,nucleoporin, putative | location=Tb927_10_v5.1:2027678-2031655(-) | length=1325 | sequence_SO=chromosome | SO=protein_coding	0.99817	0.974754	0.986462	0.0175621	1	45	45	45	42	32	42	32	42	32	46.6	46.6	46.6	144.37	1325	1325	2.05	1	84	1	2					0	289.22	0.82054	1.0121	33.16	72	0	Median	0.80065	0.99817	41.64	41	0	Median	0.91904
Tb927.4.560	Tb927.4.560	167	165	165	>Tb927.4.560 | organism=Trypanosoma_brucei_TREU927 | product=Cytoplasmic dynein 2 heavy chain (DYNC2H1), putative | location=Tb927_04_v5.1:151879-164577(-) | length=4232 | sequence_SO=chromosome | SO=protein_coding	0.9972	0.9758	0.9865	0.0160499	1	167	165	165	137	150	135	148	135	148	47	46.4	46.4	479.84	4232	4232	1.67	239	216	42	13	1				0	323.31	0.83549	1.0109	15.561	453	0	Median	0.79397	0.9972	16.482	228	0	Median	0.88776
Tb927.7.1920	Tb927.7.1920	21	21	21	>Tb927.7.1920 | organism=Trypanosoma_brucei_TREU927 | product=paraflagellar rod component, putative (PFC5) | location=Tb927_07_v5.1:458754-460385(+) | length=543 | sequence_SO=chromosome | SO=protein_coding	0.9958	0.977231	0.986515	0.0139271	1	21	21	21	14	19	14	19	14	19	57.8	57.8	57.8	59.271	543	543	4.27				32	12				0	122.42	0.84506	1.006	18.252	38	0	Median	0.78294	0.9958	16.526	18	0	Median	0.90064
Tb927.6.4140	Tb927.6.4140	11	11	11	>Tb927.6.4140 | organism=Trypanosoma_brucei_TREU927 | product=paraflagellar rod component, putative (PFC4) | location=Tb927_06_v5.1:1194977-1195324(-) | length=115 | sequence_SO=chromosome | SO=protein_coding	0.99457	0.978569	0.98657	0.0120005	1	11	11	11	11	8	11	8	11	8	90.4	90.4	90.4	13.009	115	115	7.91							5	50	0	120.56	0.81126	1.0077	16.181	52	0	Median	0.79983	0.99457	10.578	33	0	Median	0.89874
Tb927.10.16120	Tb927.10.16120	28	28	28	>Tb927.10.16120 | organism=Trypanosoma_brucei_TREU927 | product=inosine-5-monophosphate dehydrogenase,IMP dehydrogenase | location=Tb927_10_v5.1:3965348-3966691(+) | length=447 | sequence_SO=chromosome | SO=protein_coding	0.97741	0.995818	0.986614	0.0138057	1	28	28	28	27	25	27	25	27	25	74.9	74.9	74.9	48.481	447	447	4.64	5	16	1		63	4	13	1	0	287.1	0.79594	0.98214	16.802	92	0	Median	0.76506	0.97741	13.881	60	0	Median	0.87088
Tb927.10.1170;Tb11.0560;Tb11.v5.0858	Tb927.10.1170;Tb11.0560	100;70;13	100;70;13	100;70;13	>Tb927.10.1170 | organism=Trypanosoma_brucei_TREU927 | product=intraflagellar transport protein IFT172, putative (IFT172) | location=Tb927_10_v5.1:311528-316771(-) | length=1747 | sequence_SO=chromosome | SO=protein_coding;>Tb11.0560 | organism=Trypanosoma	1.0027	0.970874	0.986787	0.0238697	3	100	100	100	81	92	81	92	81	92	64.9	64.9	64.9	196.6	1747	1747;1165;368	2.25	74	166	55	39	5	3			0	323.31	0.83659	1.0076	15.183	290	0	Median	0.80158	1.0027	15.114	162	0	Median	0.88632
Tb927.10.10610	Tb927.10.10610	6	6	6	>Tb927.10.10610 | organism=Trypanosoma_brucei_TREU927 | product=protein tyrosine phosphatase, putative | location=Tb927_10_v5.1:2586326-2587015(-) | length=229 | sequence_SO=chromosome | SO=protein_coding	0.99554	0.978091	0.986815	0.0130869	1	6	6	6	5	5	5	5	5	5	28.4	28.4	28.4	25.449	229	229	7							11		0	48.188	0.81491	1.0224	17.631	9	0	Median	0.77927	0.99554	19.473	6	0	Median	0.83822
Tb927.10.230	Tb927.10.230	14	14	14	>Tb927.10.230 | organism=Trypanosoma_brucei_TREU927 | product=proteasome alpha 5 subunit, putative,20S proteasome subunit alpha 5 | location=Tb927_10_v5.1:77658-78398(+) | length=246 | sequence_SO=chromosome | SO=protein_coding	0.97097	1.00275	0.986859	0.0238331	1	14	14	14	12	12	12	12	12	12	75.6	75.6	75.6	27.176	246	246	6.84						13	18	7	0	147.78	0.77717	0.9771	10.646	35	0	Median	0.76732	0.97097	9.5465	22	0	Median	0.87177
Tb927.3.1290	Tb927.3.1290	12	12	12	>Tb927.3.1290 | organism=Trypanosoma_brucei_TREU927 | product=cullin 4B, putative | location=Tb927_03_v5.1:317136-320098(+) | length=947 | sequence_SO=chromosome | SO=protein_coding	1.0352	0.938791	0.986995	0.0723069	1	12	12	12	7	10	7	10	7	10	21.8	21.8	21.8	105.84	947	947	3			17						0	36.918	0.85543	1.0501	17.555	14	0	Median	0.82825	1.0352	15.717	5	0	Median	0.88222
Tb927.8.3060	Tb927.8.3060	23	23	23	>Tb927.8.3060 | organism=Trypanosoma_brucei_TREU927 | product=cytosolic leucyl aminopeptidase, putative,metallo-peptidase, Clan MF, Family M17 | location=Tb927_08_v5.1:919954-921969(+) | length=671 | sequence_SO=chromosome | SO=protein_coding	0.97373	1.00042	0.987075	0.0200176	1	23	23	23	19	21	19	21	19	21	42	42	42	71.314	671	671	1.44	50	18		2				1	0	144.93	0.80944	0.98673	12.045	67	0	Median	0.77026	0.97373	13.623	33	0	Median	0.84184
Tb927.10.2530	Tb927.10.2530	17	17	17	>Tb927.10.2530 | organism=Trypanosoma_brucei_TREU927 | product=adenylate kinase, putative | location=Tb927_10_v5.1:658114-658782(+) | length=222 | sequence_SO=chromosome | SO=protein_coding	0.95794	1.01629	0.987116	0.0437634	1	17	17	17	15	15	15	15	15	15	74.8	74.8	74.8	24.941	222	222	7.08						1	42	5	0	188.73	0.78931	0.96702	13.867	42	0	Median	0.75812	0.95794	13.328	24	0	Median	0.8599
Tb927.11.8260	Tb927.11.8260	12	12	12	>Tb927.11.8260 | organism=Trypanosoma_brucei_TREU927 | product=carbonic anhydrase-like protein | location=Tb927_11_v5.1:2321078-2322346(+) | length=422 | sequence_SO=chromosome | SO=protein_coding	1.0062	0.968148	0.987174	0.0285391	1	12	12	12	10	10	10	10	10	10	39.3	39.3	39.3	45.777	422	422	4.04				22	1				0	26.267	0.81434	1.0086	7.7666	22	0	Median	0.78659	1.0062	7.492	13	0	Median	0.84491
Tb927.7.5760	Tb927.7.5760	6	6	6	>Tb927.7.5760 | organism=Trypanosoma_brucei_TREU927 | product=nuclear transport factor 2 protein, putative (NFT2) | location=Tb927_07_v5.1:1554226-1554633(+) | length=135 | sequence_SO=chromosome | SO=protein_coding	0.92659	1.04798	0.987283	0.0910398	1	6	6	6	4	3	4	3	4	3	65.2	65.2	65.2	15.812	135	135	8								7	0	11.333	0.8068	0.94599	18.428	6	0	Median	0.74662	0.92659	22.79	4	0	Median	0.84268
Tb927.10.1630	Tb927.10.1630	15	15	14	>Tb927.10.1630 | organism=Trypanosoma_brucei_TREU927 | product=unspecified product (RLI) | location=Tb927_10_v5.1:442367-444262(-) | length=631 | sequence_SO=chromosome | SO=protein_coding	0.9752	0.9996	0.9874	0.0183001	1	15	15	14	9	15	9	15	9	14	34.1	34.1	33	71.078	631	631	4				26					0	42.061	0.82232	0.98138	15.407	23	0	Median	0.7818	0.9752	15.977	9	0	Median	0.86116
Tb927.11.14290	Tb927.11.14290	9	9	9	>Tb927.11.14290 | organism=Trypanosoma_brucei_TREU927 | product=vacuolar sorting protein, putative | location=Tb927_11_v5.1:3802287-3802967(+) | length=226 | sequence_SO=chromosome | SO=protein_coding	0.99596	0.978953	0.987456	0.0127556	1	9	9	9	9	5	9	5	9	5	63.7	63.7	63.7	25.075	226	226	7							15		0	45.835	0.80429	0.99596	13.232	10	0	Median	0.77653	0.99596	4.8661	6	0	Median	0.89515
Tb11.v5.0584;Tb927.3.3180	Tb11.v5.0584;Tb927.3.3180	3;3	3;3	3;3	>Tb11.v5.0584 | organism=Trypanosoma_brucei_TREU927 | product=hypothetical protein, conserved | location=Tb927_11_bin_v5.1:2694518-2696359(-) | length=613 | sequence_SO=random_sequence | SO=protein_coding;>Tb927.3.3180 | organism=Trypanosoma_brucei_TREU927	0.97782	0.997108	0.987464	0.0144663	2	3	3	3	3	3	3	3	3	3	29.7	29.7	29.7	61.073	613	613;992	2.71		6	6	2					0	61.189	0.83799	0.98355	11.289	12	0	Median	0.76608	0.97782	12.84	6	0	Median	0.85393
Tb927.3.3690	Tb927.3.3690	17	17	17	>Tb927.3.3690 | organism=Trypanosoma_brucei_TREU927 | product=flagellar radial spoke protein-like, putative | location=Tb927_03_v5.1:1030636-1032282(+) | length=548 | sequence_SO=chromosome | SO=protein_coding	1.0383	0.93668	0.98749	0.0762147	1	17	17	17	17	6	17	6	17	6	44.7	44.7	44.7	60.992	548	548	6.46				4	2	10	15	6	0	51.564	0.85405	1.0569	14.413	36	0	Median	0.82663	1.0383	12.674	24	0	Median	0.95733
Tb927.5.3090	Tb927.5.3090	5	5	5	>Tb927.5.3090 | organism=Trypanosoma_brucei_TREU927 | product=hypothetical protein, conserved | location=Tb927_05_v5.1:1019968-1020273(+) | length=101 | sequence_SO=chromosome | SO=protein_coding	1.0112	0.963855	0.987528	0.0355084	1	5	5	5	5	3	5	3	5	3	62.4	62.4	62.4	11.655	101	101	8								9	0	17.093	0.8201	1.0112	16.761	8	0	Median	0.7937	1.0112	19.559	6	0	Median	0.88854
Tb927.6.590	Tb927.6.590	4	4	4	>Tb927.6.590 | organism=Trypanosoma_brucei_TREU927 | product=hypothetical protein, conserved | location=Tb927_06_v5.1:242552-242848(-) | length=98 | sequence_SO=chromosome | SO=protein_coding	1.0052	0.969932	0.987566	0.0264509	1	4	4	4	3	3	3	3	3	3	33.7	33.7	33.7	12.277	98	98	8								7	0	4.1334	0.78739	0.93547	9.5199	4	0	Median	0.79273	1.0052	158.85	3	1	Median	0.87914
Tb927.10.4180	Tb927.10.4180	15	15	15	>Tb927.10.4180 | organism=Trypanosoma_brucei_TREU927 | product=TFIIF-stimulated CTD phosphatase, putative | location=Tb927_10_v5.1:1098448-1099191(-) | length=247 | sequence_SO=chromosome | SO=protein_coding	0.99265	0.982801	0.987725	0.00738676	1	15	15	15	15	11	15	11	15	11	78.1	78.1	78.1	28.189	247	247	6.57				3		12	30	1	0	91.366	0.80887	1.0082	12.955	43	0	Median	0.78427	0.99265	8.6998	22	0	Median	0.91622
Tb927.2.450	Tb927.2.450	48	20	8	>Tb927.2.450 | organism=Trypanosoma_brucei_TREU927 | product=retrotransposon hot spot protein 4 (RHS4), putative | location=Tb927_02_v5.1:77151-79724(-) | length=857 | sequence_SO=chromosome | SO=protein_coding	0.97343	1.00208	0.987757	0.0214908	1	48	20	8	42	37	17	13	6	7	54	28.1	15.2	97.997	857	857	3.1	2	4	37	5			2		0	91.661	0.81497	0.97662	14.012	48	0	Median	0.76333	0.97343	16.025	27	0	Median	0.84503
Tb927.9.13510;Tb11.v5.0807	Tb927.9.13510;Tb11.v5.0807	13;12	13;12	13;12	>Tb927.9.13510 | organism=Trypanosoma_brucei_TREU927 | product=Poly(A)-specific ribonuclease PARN-3 | location=Tb927_09_v5.1:2142247-2144733(-) | length=623 | sequence_SO=chromosome | SO=protein_coding;>Tb11.v5.0807 | organism=Trypanosoma_brucei_TREU927 |	1.0051	0.970497	0.987798	0.0259523	2	13	13	13	13	7	13	7	13	7	34.3	34.3	34.3	70.77	623	623;566	4				22					0	33.934	0.81556	1.0137	5.4328	19	0	Median	0.79319	1.0051	5.0924	12	0	Median	0.85904
Tb927.5.1700	Tb927.5.1700	7	7	7	>Tb927.5.1700 | organism=Trypanosoma_brucei_TREU927 | product=replication Factor A 28 kDa subunit, putative | location=Tb927_05_v5.1:594919-595686(+) | length=255 | sequence_SO=chromosome | SO=protein_coding	1.0284	0.947329	0.987864	0.0608036	1	7	7	7	7	6	7	6	7	6	33.7	33.7	33.7	27.593	255	255	6.71						6	10	1	0	42.205	0.85693	1.0346	7.2689	15	0	Median	0.79624	1.0284	7.0408	9	0	Median	0.95842
Tb927.10.4690	Tb927.10.4690	8	8	8	>Tb927.10.4690 | organism=Trypanosoma_brucei_TREU927 | product=dynein light chain, putative | location=Tb927_10_v5.1:1185279-1185617(-) | length=112 | sequence_SO=chromosome | SO=protein_coding	0.96159	1.01418	0.987884	0.0394412	1	8	8	8	7	8	7	8	7	8	67	67	67	13.029	112	112	8								19	0	54.832	0.77013	0.97373	25.954	16	0	Median	0.75731	0.96159	32.372	9	0	Median	0.82907
Tb927.6.2090	Tb927.6.2090	14	14	14	>Tb927.6.2090 | organism=Trypanosoma_brucei_TREU927 | product=hypothetical protein, conserved | location=Tb927_06_v5.1:676063-678195(-) | length=710 | sequence_SO=chromosome | SO=protein_coding	0.94358	1.03225	0.987914	0.0665006	1	14	14	14	10	9	10	9	10	9	27.5	27.5	27.5	78.295	710	710	4.38				19				2	0	25.179	0.76649	0.95609	21.559	12	0	Median	0.73637	0.94358	13.9	7	0	Median	0.88353
Tb927.10.14530	Tb927.10.14530	5	5	5	>Tb927.10.14530 | organism=Trypanosoma_brucei_TREU927 | product=proteasome regulatory non-ATPase subunit 8,26S proteasome regulatory subunit (Rpn8) | location=Tb927_10_v5.1:3552922-3554067(-) | length=381 | sequence_SO=chromosome | SO=protein_coding	0.94198	1.0341	0.988042	0.0690936	1	5	5	5	4	5	4	5	4	5	23.6	23.6	23.6	42.35	381	381	5.31					9	4			0	110.26	0.81804	0.94843	13.8	12	0	Median	0.75405	0.94198	16.569	6	0	Median	0.87814
Tb927.10.5810	Tb927.10.5810	37	37	37	>Tb927.10.5810 | organism=Trypanosoma_brucei_TREU927 | product=hypothetical protein, conserved | location=Tb927_10_v5.1:1440824-1442125(-) | length=433 | sequence_SO=chromosome | SO=protein_coding	0.97324	1.0029	0.988069	0.0222438	1	37	37	37	33	32	33	32	33	32	78.3	78.3	78.3	48.257	433	433	6.12			2	8	81	56	47	42	0	323.31	0.79745	0.98509	13.431	215	0	Median	0.76651	0.97324	12.462	127	0	Median	0.86812
Tb927.1.190;Tb927.2.1060	Tb927.1.190	32;1	15;1	8;0	>Tb927.1.190 | organism=Trypanosoma_brucei_TREU927 | product=retrotransposon hot spot protein (RHS, pseudogene), putative | location=Tb927_01_v5.1:75424-77913(-) | length=830 | sequence_SO=chromosome | SO=protein_coding	0.98586	0.990393	0.988127	0.00339989	2	32	15	8	24	30	10	14	5	7	48.3	30.2	15.9	94.659	830	830;150	3.18			31	7					0	81.387	0.81137	1.0035	14.25	35	0	Median	0.75692	0.98586	10.731	14	0	Median	0.8614
Tb927.9.13740;Tb927.9.13710;Tb927.9.13680;Tb927.9.13650	Tb927.9.13740;Tb927.9.13710;Tb927.9.13680;Tb927.9.13650	14;14;14;13	14;14;14;13	14;14;14;13	>Tb927.9.13740 | organism=Trypanosoma_brucei_TREU927 | product=ADP-ribosylation factor, putative | location=Tb927_09_v5.1:2174469-2175017(-) | length=182 | sequence_SO=chromosome | SO=protein_coding;>Tb927.9.13710 | organism=Trypanosoma_brucei_TREU927 | pr	0.99729	0.979048	0.988169	0.0136812	4	14	14	14	13	12	13	12	13	12	80.2	80.2	80.2	20.624	182	182;182;182;182	7.2							43	11	0	174.21	0.80408	1.0052	13.138	53	0	Median	0.78983	0.99729	12.948	30	0	Median	0.87983
Tb927.11.7890	Tb927.11.7890	3	3	3	>Tb927.11.7890 | organism=Trypanosoma_brucei_TREU927 | product=zinc finger protein family member, putative (ZC3H44) | location=Tb927_11_v5.1:2233413-2234702(-) | length=429 | sequence_SO=chromosome | SO=protein_coding	0.97844	0.998004	0.988222	0.014673	1	3	3	3	3	2	3	2	3	2	12.8	12.8	12.8	48.18	429	429	5.43					4	3			0	8.5363	0.80918	1.027	14.034	6	0	Median	0.77748	0.97844	13.896	5	0	Median	0.91055
Tb927.11.6590;Tb11.v5.0360	Tb927.11.6590	28;11	28;11	28;11	>Tb927.11.6590 | organism=Trypanosoma_brucei_TREU927 | product=aminopeptidase, putative,metallo-peptidase, Clan MF, Family M17 | location=Tb927_11_v5.1:1853205-1854770(-) | length=521 | sequence_SO=chromosome | SO=protein_coding	0.96253	1.01392	0.988226	0.0385434	2	28	28	28	28	25	28	25	28	25	72.6	72.6	72.6	55.359	521	521;216	5.51				1	70	25	5	7	0	206.34	0.79647	0.97483	12.407	96	0	Median	0.74878	0.96253	10.968	58	0	Median	0.85314
Tb927.10.14790	Tb927.10.14790	18	18	18	>Tb927.10.14790 | organism=Trypanosoma_brucei_TREU927 | product=aminopeptidase, putative,metallo-peptidase, Clan MG, Family M24 | location=Tb927_10_v5.1:3606028-3607176(-) | length=382 | sequence_SO=chromosome | SO=protein_coding	0.98705	0.989511	0.988281	0.00184589	1	18	18	18	16	15	16	15	16	15	38.2	38.2	38.2	42.69	382	382	5.45					25	18	1		0	58.209	0.81224	1.0016	12.949	40	0	Median	0.7611	0.98705	11.752	23	0	Median	0.91621
Tb927.3.780	Tb927.3.780	13	13	13	>Tb927.3.780 | organism=Trypanosoma_brucei_TREU927 | product=proteasome alpha 7 subunit (TbPSA7) | location=Tb927_03_v5.1:187121-187834(-) | length=237 | sequence_SO=chromosome | SO=protein_coding	0.97439	1.00222	0.988307	0.0208762	1	13	13	13	13	7	13	7	13	7	54	54	54	25.463	237	237	6.79						6	17	1	0	66.126	0.80838	0.97885	14.283	18	0	Median	0.76219	0.97439	11.576	11	0	Median	0.86284
Tb927.10.2470	Tb927.10.2470	10	10	10	>Tb927.10.2470 | organism=Trypanosoma_brucei_TREU927 | product=hypothetical protein, conserved | location=Tb927_10_v5.1:640940-642592(+) | length=550 | sequence_SO=chromosome | SO=protein_coding	0.91826	1.05863	0.988443	0.105275	1	10	10	10	6	8	6	8	6	8	23.3	23.3	23.3	64.233	550	550	4				18					0	52.275	0.78917	0.93135	11.253	14	0	Median	0.72394	0.91826	11.554	7	0	Median	0.80996
Tb927.7.710	Tb927.7.710	41	38	38	>Tb927.7.710 | organism=Trypanosoma_brucei_TREU927 | product=heat shock 70 kDa protein, putative (HSP70) | location=Tb927_07_v5.1:155358-157286(-) | length=639 | sequence_SO=chromosome | SO=protein_coding	0.9661	1.01119	0.988647	0.0338204	1	41	38	38	40	37	37	34	37	34	72.1	67.4	67.4	70.211	639	639	4.29				100	5	8	3	1	0	260.21	0.79705	0.97443	12.327	105	0	Median	0.76178	0.9661	11.136	52	0	Median	0.84215
Tb927.10.14770	Tb927.10.14770	15	15	15	>Tb927.10.14770 | organism=Trypanosoma_brucei_TREU927 | product=protein kinase, putative | location=Tb927_10_v5.1:3600652-3602574(-) | length=640 | sequence_SO=chromosome | SO=protein_coding	0.97197	1.00538	0.988674	0.0250566	1	15	15	15	11	10	11	10	11	10	31.1	31.1	31.1	70.531	640	640	4.64				14	6			2	0	25.468	0.80696	0.97197	17.685	18	0	Median	0.77542	0.97197	17.129	10	0	Median	0.88352
Tb927.3.3200	Tb927.3.3200	5	5	5	>Tb927.3.3200 | organism=Trypanosoma_brucei_TREU927 | product=hypothetical protein, conserved | location=Tb927_03_v5.1:826007-827061(-) | length=350 | sequence_SO=chromosome | SO=protein_coding	0.95679	1.02076	0.988776	0.0479792	1	5	5	5	5	2	5	2	5	2	30	30	30	39.357	350	350	5.71					2	5			0	21.907	0.80673	0.97966	10.758	6	0	Median	0.72064	0.95679	13.845	4	0	Median	0.85489
Tb927.6.4590;Tb11.v5.0810	Tb927.6.4590;Tb11.v5.0810	35;34	35;34	35;34	>Tb927.6.4590 | organism=Trypanosoma_brucei_TREU927 | product=glutamyl-tRNA synthetase, putative | location=Tb927_06_v5.1:1285581-1287404(+) | length=607 | sequence_SO=chromosome | SO=protein_coding;>Tb11.v5.0810 | organism=Trypanosoma_brucei_TREU927 | pro	0.96857	1.00902	0.988795	0.030338	2	35	35	35	26	26	26	26	26	26	57	57	57	68.931	607	607;471	4.46				59	5			7	0	171.51	0.81245	0.98351	13.581	62	0	Median	0.76102	0.96857	14.724	34	0	Median	0.84111
Tb927.10.5380;Tb11.v5.0337	Tb927.10.5380;Tb11.v5.0337	52;49	52;49	52;49	>Tb927.10.5380 | organism=Trypanosoma_brucei_TREU927 | product=intraflagellar transport protein IFT122, putative | location=Tb927_10_v5.1:1350736-1354464(+) | length=1242 | sequence_SO=chromosome | SO=protein_coding;>Tb11.v5.0337 | organism=Trypanosoma_bru	1.0088	0.968804	0.988802	0.0299966	2	52	52	52	47	32	47	32	47	32	52.8	52.8	52.8	139.43	1242	1242;1231	2.48		71	50	1		2			0	219.03	0.83931	1.0105	15.361	109	0	Median	0.80553	1.0088	16.74	66	0	Median	0.88432
Tb927.9.5890	Tb927.9.5890	5	5	5	>Tb927.9.5890 | organism=Trypanosoma_brucei_TREU927 | product=solanesyl-diphosphate synthase, putative | location=Tb927_09_v5.1:993572-994651(+) | length=359 | sequence_SO=chromosome | SO=protein_coding	0.98996	0.987654	0.988807	0.00172926	1	5	5	5	5	2	5	2	5	2	13.6	13.6	13.6	39.253	359	359	6						7			0	8.3094	0.83541	0.98996	10.362	6	0	Median	0.78021	0.98996	12.73	4	0	Median	0.92214
Tb927.3.640	Tb927.3.640	4	4	4	>Tb927.3.640 | organism=Trypanosoma_brucei_TREU927 | product=hypothetical protein, conserved | location=Tb927_03_v5.1:160377-161267(-) | length=296 | sequence_SO=chromosome | SO=protein_coding	0.858	1.11983	0.988917	0.196375	1	4	4	4	4	3	4	3	4	3	14.2	14.2	14.2	32.723	296	296	6.22						7	2		0	41.434	0.72878	0.89103	18.891	9	0	Median	0.69505	0.858	19.945	6	0	Median	0.76276
Tb927.10.14890;Tb11.v5.0636;REV__CON__Q497I4;Tb927.7.4830;Tb11.v5.0165	Tb927.10.14890;Tb11.v5.0636	67;67;1;1;1	67;67;1;1;1	67;67;1;1;1	>Tb927.10.14890 | organism=Trypanosoma_brucei_TREU927 | product=C-terminal motor kinesin, putative (TBKIFC1) | location=Tb927_10_v5.1:3633146-3635608(+) | length=820 | sequence_SO=chromosome | SO=protein_coding;>Tb11.v5.0636 | organism=Trypanosoma_brucei_T	1.0031	0.974944	0.989022	0.021117	5	67	67	67	65	64	65	64	65	64	78.3	78.3	78.3	90.8	820	820;820;455;516;516	4.12	11	60	197	131	58	42	46	35	0	323.31	0.82818	1.015	13.492	521	0	Median	0.78982	1.0031	13.481	278	0	Median	0.88743
Tb927.7.4460	Tb927.7.4460	13	13	13	>Tb927.7.4460 | organism=Trypanosoma_brucei_TREU927 | product=hypothetical protein, conserved | location=Tb927_07_v5.1:1185409-1187937(-) | length=842 | sequence_SO=chromosome | SO=protein_coding	0.99574	0.982608	0.989174	0.00984912	1	13	13	13	12	9	12	9	12	9	19.5	19.5	19.5	91.199	842	842	3.18			23	5					0	57.831	0.87773	1.0091	13.107	26	0	Median	0.7896	0.99574	14.508	14	0	Median	0.90012
Tb11.02.5420b;Tb11.02.5420	Tb11.02.5420b;Tb11.02.5420	22;22	7;7	7;7	>Tb11.02.5420b | organism=Trypanosoma_brucei_TREU927 | product=NADPH-cytochrome p450 reductase, putative | location=Tb927_11_bin_v5.1:661542-663437(-) | length=631 | sequence_SO=random_sequence | SO=protein_coding;>Tb11.02.5420 | organism=Trypanosoma_bruce	0.95867	1.01988	0.989274	0.0459056	2	22	7	7	15	19	5	7	5	7	44.1	16.2	16.2	69.959	631	631;631	4				15					0	19.838	0.8291	0.95867	10.769	15	0	Median	0.75077	0.95867	12.539	7	0	Median	0.84897
Tb927.10.8940	Tb927.10.8940	34	34	34	>Tb927.10.8940 | organism=Trypanosoma_brucei_TREU927 | product=hypothetical protein, conserved | location=Tb927_10_v5.1:2219490-2220725(+) | length=411 | sequence_SO=chromosome | SO=protein_coding	0.97606	1.00259	0.989323	0.019895	1	34	34	34	31	28	31	28	31	28	78.6	78.6	78.6	45.398	411	411	5.67	7	14	18	23	81	52	55	58	0	323.31	0.80311	0.98685	18.316	272	0	Median	0.76493	0.97606	20.101	158	0	Median	0.87713
Tb927.11.2260	Tb927.11.2260	7	7	7	>Tb927.11.2260 | organism=Trypanosoma_brucei_TREU927 | product=eukaryotic translation initiation factor 4e, putative (eIF4E) | location=Tb927_11_v5.1:640550-641251(+) | length=233 | sequence_SO=chromosome | SO=protein_coding	1.0482	0.930492	0.989346	0.0882808	1	7	7	7	7	2	7	2	7	2	42.9	42.9	42.9	26.024	233	233	6.8						2	8		0	52.704	0.84131	1.0576	6.638	10	0	Median	0.81973	1.0482	7.1935	8	0	Median	0.91805
Tb927.11.16880	Tb927.11.16880	5	5	5	>Tb927.11.16880 | organism=Trypanosoma_brucei_TREU927 | product=leucine-rich repeat protein (LRRP), putative | location=Tb927_11_v5.1:4494906-4496792(-) | length=628 | sequence_SO=chromosome | SO=protein_coding	1.1093	0.869414	0.989357	0.179914	1	5	5	5	4	3	4	3	4	3	12.4	12.4	12.4	70.687	628	628	4				10					0	23.375	0.9003	1.1201	9.2135	7	0	Median	0.87774	1.1093	11	4	0	Median	0.96433
Tb927.10.7060	Tb927.10.7060	28	28	28	>Tb927.10.7060 | organism=Trypanosoma_brucei_TREU927 | product=nucleoporin interacting component (NUP93), putative | location=Tb927_10_v5.1:1776795-1779446(+) | length=883 | sequence_SO=chromosome | SO=protein_coding	1.0035	0.975229	0.989365	0.0212031	1	28	28	28	19	22	19	22	19	22	46.5	46.5	46.5	96.511	883	883	3.22	1		43	3				2	0	132	0.85172	1.0126	17.658	43	0	Median	0.79501	1.0035	7.3035	22	0	Median	0.9346
Tb927.11.4570	Tb927.11.4570	7	7	7	>Tb927.11.4570 | organism=Trypanosoma_brucei_TREU927 | product=small GTPase, putative,small GTP-binding protein Rab5b, putative (RAB5B) | location=Tb927_11_v5.1:1322602-1323213(+) | length=203 | sequence_SO=chromosome | SO=protein_coding	1.05	0.928764	0.989382	0.0909271	1	7	7	7	6	6	6	6	6	6	56.2	56.2	56.2	21.844	203	203	7							12		0	49.846	0.84264	1.0633	10.178	10	0	Median	0.83921	1.05	6.8062	5	0	Median	0.89565
Tb11.v5.0537;Tb927.11.9920;Tb11.01.1680.v5	Tb11.v5.0537;Tb927.11.9920;Tb11.01.1680.v5	11;11;11	11;11;11	11;11;11	>Tb11.v5.0537 | organism=Trypanosoma_brucei_TREU927 | product=polyubiquitin, putative | location=Tb927_11_bin_v5.1:2333410-2335281(+) | length=623 | sequence_SO=random_sequence | SO=protein_coding;>Tb927.11.9920 | organism=Trypanosoma_brucei_TREU927 | prod	0.95022	1.02862	0.989418	0.0587971	3	11	11	11	9	8	9	8	9	8	75.3	75.3	75.3	70.128	623	623;685;1283	5.5	14	16	11	12	9	7	9	61	0	179.38	0.79505	0.95896	9.7464	118	0	Median	0.74732	0.95022	11.039	60	0	Median	0.83415
Tb927.4.2760	Tb927.4.2760	14	14	14	>Tb927.4.2760 | organism=Trypanosoma_brucei_TREU927 | product=hypothetical protein, conserved | location=Tb927_04_v5.1:730990-733477(+) | length=672 | sequence_SO=chromosome | SO=protein_coding	1.0484	0.930752	0.989576	0.088236	1	14	14	14	9	9	9	9	9	9	27.8	27.8	27.8	75.492	672	672	4.1			1	18			1		0	34.09	0.84634	1.0536	17.168	18	0	Median	0.81753	1.0484	20.141	10	0	Median	0.94198
Tb927.9.3770	Tb927.9.3770	6	6	6	>Tb927.9.3770 | organism=Trypanosoma_brucei_TREU927 | product=hypothetical protein, conserved | location=Tb927_09_v5.1:750397-751059(+) | length=220 | sequence_SO=chromosome | SO=protein_coding	1.0113	0.967867	0.989583	0.0325749	1	6	6	6	5	4	5	4	5	4	43.6	43.6	43.6	23.95	220	220	7.25							12	4	0	54.293	0.8005	1.0266	8.0468	15	0	Median	0.79655	1.0113	4.5828	9	0	Median	0.88955
Tb927.11.14730	Tb927.11.14730	12	12	12	>Tb927.11.14730 | organism=Trypanosoma_brucei_TREU927 | product=metalloprotease, putative,cell division protein FtsH homologue, putative | location=Tb927_11_v5.1:3914527-3916560(-) | length=677 | sequence_SO=chromosome | SO=protein_coding	0.98946	0.989707	0.989584	0.000185285	1	12	12	12	9	8	9	8	9	8	26.9	26.9	26.9	74.475	677	677	4				20					0	39.234	0.85374	0.98946	21.578	17	0	Median	0.79862	0.98946	26.662	9	0	Median	0.86828
Tb927.5.4500;Tb05.5K5.150	Tb927.5.4500;Tb05.5K5.150	16;16	16;16	16;16	>Tb927.5.4500 | organism=Trypanosoma_brucei_TREU927 | product=ras-like small GTPase, putative (TbSAR1) | location=Tb927_05_v5.1:1383483-1384100(-) | length=194 | sequence_SO=chromosome | SO=protein_coding;>Tb05.5K5.150 | organism=Trypanosoma_brucei_TREU927	0.94784	1.03144	0.989639	0.0626987	2	16	16	16	15	12	15	12	15	12	80.4	80.4	80.4	21.771	194	194;194	7.13						1	37	7	0	139.67	0.78229	0.95549	14.18	38	0	Median	0.73504	0.94784	14.485	21	0	Median	0.82207
Tb927.11.8440	Tb927.11.8440	14	14	14	>Tb927.11.8440 | organism=Trypanosoma_brucei_TREU927 | product=haloacid dehalogenase-like hydrolase, putative | location=Tb927_11_v5.1:2363092-2363955(+) | length=287 | sequence_SO=chromosome | SO=protein_coding	0.92591	1.0534	0.989653	0.095615	1	14	14	14	12	10	12	10	12	10	62	62	62	31.585	287	287	6.25						29	5	2	0	88.779	0.76621	0.93057	16.4	30	0	Median	0.71226	0.92591	17.355	16	0	Median	0.83234
Tb927.7.2170	Tb927.7.2170	14	14	14	>Tb927.7.2170 | organism=Trypanosoma_brucei_TREU927 | product=hypothetical protein, conserved | location=Tb927_07_v5.1:559406-563851(-) | length=1481 | sequence_SO=chromosome | SO=protein_coding	1.0712	0.908183	0.989691	0.122263	1	14	14	14	6	13	6	13	6	13	11.5	11.5	11.5	168.67	1481	1481	1.85	6	13			1				0	27.783	0.94318	1.0792	19.053	15	0	Median	0.86685	1.0712	22.388	5	0	Median	0.9592
Tb927.11.7380	Tb927.11.7380	39	39	39	>Tb927.11.7380 | organism=Trypanosoma_brucei_TREU927 | product=glycerol-3-phosphate dehydrogenase (FAD-dependent), mitochondrial | location=Tb927_11_v5.1:2077880-2079691(+) | length=603 | sequence_SO=chromosome | SO=protein_coding	0.93466	1.04506	0.989862	0.0828023	1	39	39	39	39	37	39	37	39	37	78.8	78.8	78.8	66.991	603	603	3.69	20	7	5	115	7	5	1	2	0	229.8	0.75433	0.94324	14.783	144	0	Median	0.73411	0.93466	12.209	85	0	Median	0.81635
Tb927.1.3950	Tb927.1.3950	29	29	29	>Tb927.1.3950 | organism=Trypanosoma_brucei_TREU927 | product=alanine aminotransferase (ALAT) | location=Tb927_01_v5.1:840877-842391(+) | length=504 | sequence_SO=chromosome | SO=protein_coding	1.0034	0.976372	0.989886	0.0202711	1	29	29	29	27	28	27	28	27	28	74.4	74.4	74.4	55.704	504	504	5.23	1			9	71	12	8	3	0	249.11	0.83283	1.006	14.801	84	0	Median	0.78032	1.0034	14.613	48	0	Median	0.90118
Tb927.7.3370	Tb927.7.3370	36	36	36	>Tb927.7.3370 | organism=Trypanosoma_brucei_TREU927 | product=hypothetical protein, conserved | location=Tb927_07_v5.1:879487-881277(-) | length=596 | sequence_SO=chromosome | SO=protein_coding	0.98006	0.9998	0.98993	0.014805	1	36	36	36	29	30	29	30	29	30	57.4	57.4	57.4	67.485	596	596	4.22		1		67			2	3	0	102.43	0.81123	0.9931	11.584	65	0	Median	0.75793	0.98006	11.522	31	0	Median	0.85622
Tb927.4.1720	Tb927.4.1720	6	6	6	>Tb927.4.1720 | organism=Trypanosoma_brucei_TREU927 | product=nucleoside diphosphate kinase, putative | location=Tb927_04_v5.1:438461-439510(-) | length=349 | sequence_SO=chromosome | SO=protein_coding	1.0267	0.95338	0.99004	0.0549902	1	6	6	6	5	4	5	4	5	4	22.6	22.6	22.6	38.948	349	349	6						9			0	21.754	0.88943	1.0476	8.8938	7	0	Median	0.80016	1.0267	4.7803	4	0	Median	0.93461
Tb927.7.6890	Tb927.7.6890	9	9	9	>Tb927.7.6890 | organism=Trypanosoma_brucei_TREU927 | product=hypothetical protein, conserved | location=Tb927_07_v5.1:1949643-1950407(-) | length=254 | sequence_SO=chromosome | SO=protein_coding	0.96937	1.01075	0.990062	0.0310383	1	9	9	9	9	5	9	5	9	5	39.8	39.8	39.8	28.794	254	254	6.69						5	11		0	31.767	0.77672	0.97315	11.135	16	0	Median	0.76799	0.96937	8.5206	11	0	Median	0.89294
Tb927.9.13440	Tb927.9.13440	44	44	44	>Tb927.9.13440 | organism=Trypanosoma_brucei_TREU927 | product=hypothetical protein, conserved | location=Tb927_09_v5.1:2127874-2132610(-) | length=1578 | sequence_SO=chromosome | SO=protein_coding	1.048	0.932401	0.9902	0.0866993	1	44	44	44	31	33	31	33	31	33	37.3	37.3	37.3	177.37	1578	1578	1.85	12	58	1						0	222.49	0.88185	1.0619	16.579	58	0	Median	0.84005	1.048	16.678	29	0	Median	0.95331
Tb927.10.14390	Tb927.10.14390	27	27	27	>Tb927.10.14390 | organism=Trypanosoma_brucei_TREU927 | product=hypothetical protein, conserved | location=Tb927_10_v5.1:3499848-3501515(-) | length=555 | sequence_SO=chromosome | SO=protein_coding	1.0054	0.975134	0.990267	0.0226994	1	27	27	27	20	23	20	23	20	23	55.5	55.5	55.5	60.759	555	555	1.14	50	8							0	149.45	0.84933	1.0219	9.1696	47	0	Median	0.80645	1.0054	8.2239	19	0	Median	0.88654
Tb11.v5.0713;Tb927.4.190	Tb11.v5.0713	41;1	41;1	17;0	>Tb11.v5.0713 | organism=Trypanosoma_brucei_TREU927 | product=retrotransposon hot spot (RHS) protein, putative | location=Tb927_11_bin_v5.1:3629729-3631795(+) | length=688 | sequence_SO=random_sequence | SO=protein_coding	0.96936	1.01132	0.990338	0.0314675	2	41	41	17	33	39	33	39	11	17	60.6	60.6	28.6	78.342	688	688;209	3.18	6	8	96	33	7				0	291.13	0.81484	0.97742	22.223	130	0	Median	0.75916	0.96936	12.215	63	0	Median	0.85978
Tb927.10.11080	Tb927.10.11080	11	11	11	>Tb927.10.11080 | organism=Trypanosoma_brucei_TREU927 | product=paraflagellar rod protein | location=Tb927_10_v5.1:2700710-2704204(-) | length=1164 | sequence_SO=chromosome | SO=protein_coding	0.99913	0.981547	0.990338	0.0131873	1	11	11	11	7	9	7	9	7	9	59.2	59.2	59.2	134.45	1164	1164	1.85	13	14	4	2					0	145.13	0.80886	1.0106	18.252	32	0	Median	0.79158	0.99913	19.614	16	0	Median	0.84404
Tb927.8.3840	Tb927.8.3840	9	9	9	>Tb927.8.3840 | organism=Trypanosoma_brucei_TREU927 | product=hypothetical protein, conserved | location=Tb927_08_v5.1:1142757-1144982(-) | length=741 | sequence_SO=chromosome | SO=protein_coding	0.95071	1.03001	0.990362	0.0594785	1	9	9	9	7	5	7	5	7	5	16.5	16.5	16.5	80.049	741	741	3.44		1	9	7	1				0	16.101	0.87243	0.97027	33.485	16	0	Median	0.78033	0.95071	35.742	9	0	Median	0.88411
Tb927.8.2640	Tb927.8.2640	51	51	51	>Tb927.8.2640 | organism=Trypanosoma_brucei_TREU927 | product=ubiquitin-activating enzyme E1, putative (UBA1) | location=Tb927_08_v5.1:779205-782385(+) | length=1055 | sequence_SO=chromosome | SO=protein_coding	0.98782	0.993147	0.990484	0.00399546	1	51	51	51	41	42	41	42	41	42	66	66	66	116.41	1055	1055	2.89	2	43	96	23	1		1		0	317.76	0.81544	0.99157	16.036	145	0	Median	0.77668	0.98782	18.203	72	0	Median	0.8937
Tb927.10.15720	Tb927.10.15720	14	14	14	>Tb927.10.15720 | organism=Trypanosoma_brucei_TREU927 | product=proteasome regulatory non-ATP-ase subunit 9,19S proteasome regulatory subunit (RPN9) | location=Tb927_10_v5.1:3869048-3870265(+) | length=405 | sequence_SO=chromosome | SO=protein_coding	1.0362	0.945001	0.9906	0.0683993	1	14	14	14	12	10	12	10	12	10	46.4	46.4	46.4	45.989	405	405	5.7					10	15	2		0	40.463	0.8522	1.0384	12.617	26	0	Median	0.83309	1.0362	7.9987	15	0	Median	0.9541
Tb927.5.590	Tb927.5.590	5	5	5	>Tb927.5.590 | organism=Trypanosoma_brucei_TREU927 | product=protein phosphatase 1, regulatory subunit, putative | location=Tb927_05_v5.1:240048-241259(-) | length=403 | sequence_SO=chromosome | SO=protein_coding	0.97887	1.00243	0.990648	0.0176669	1	5	5	5	3	4	3	4	3	4	16.4	16.4	16.4	45.74	403	403	5.14				1	4	2			0	48.54	0.89121	0.99474	17.971	6	0	Median	0.77951	0.97887	26.119	3	0	Median	0.92139
Tb927.3.1200	Tb927.3.1200	4	4	4	>Tb927.3.1200 | organism=Trypanosoma_brucei_TREU927 | product=hypothetical protein, conserved | location=Tb927_03_v5.1:295770-298091(+) | length=773 | sequence_SO=chromosome | SO=protein_coding	0.97601	1.00538	0.990694	0.0220266	1	4	4	4	3	2	3	2	3	2	7	7	7	83.763	773	773	6			3				5	2	0	21.86	0.82948	0.98528	12.838	8	0	Median	0.78702	0.97601	13.107	5	0	Median	0.91602
Tb927.11.15150	Tb927.11.15150	9	9	9	>Tb927.11.15150 | organism=Trypanosoma_brucei_TREU927 | product=1-acyl-sn-glycerol-3-phosphate acyltransferase, putative | location=Tb927_11_v5.1:4028205-4029020(-) | length=271 | sequence_SO=chromosome | SO=protein_coding	0.95481	1.02659	0.990699	0.053834	1	9	9	9	9	7	9	7	9	7	44.6	44.6	44.6	30.359	271	271	6.67						7	14		0	40.531	0.8316	0.96188	18.355	16	0	Median	0.75274	0.95481	15.404	10	0	Median	0.86364
Tb927.6.4320	Tb927.6.4320	16	16	16	>Tb927.6.4320 | organism=Trypanosoma_brucei_TREU927 | product=hypothetical protein, conserved | location=Tb927_06_v5.1:1223763-1224962(-) | length=399 | sequence_SO=chromosome | SO=protein_coding	0.92228	1.05912	0.9907	0.10263	1	16	16	16	16	13	16	13	16	13	52.1	52.1	52.1	44.423	399	399	5.05					36		1		0	68.423	0.76519	0.92493	15.546	33	0	Median	0.72454	0.92228	14.572	18	0	Median	0.85087
Tb11.v5.0154	Tb11.v5.0154	28	28	2	>Tb11.v5.0154 | organism=Trypanosoma_brucei_TREU927 | product=hypothetical protein, conserved | location=Tb927_11_bin_v5.1:161952-164048(-) | length=698 | sequence_SO=random_sequence | SO=protein_coding	1.0094	0.972195	0.990798	0.0279036	1	28	28	2	25	25	25	25	1	2	48.3	48.3	4.2	77.689	698	698	4.13			27	49	9	10	1	2	0	193.79	0.81562	1.0142	14.161	87	0	Median	0.78851	1.0094	13.534	53	0	Median	0.85659
Tb927.9.10100	Tb927.9.10100	69	69	69	>Tb927.9.10100 | organism=Trypanosoma_brucei_TREU927 | product=hypothetical protein, conserved | location=Tb927_09_v5.1:1592850-1597199(-) | length=1449 | sequence_SO=chromosome | SO=protein_coding	1.0155	0.966184	0.990842	0.0369873	1	69	69	69	62	57	62	57	62	57	66.1	66.1	66.1	160.65	1449	1449	2.24	9	141	21	16					0	314.86	0.84	1.0249	15.371	170	0	Median	0.80753	1.0155	13.776	97	0	Median	0.89784
Tb927.10.8190	Tb927.10.8190	28	28	28	>Tb927.10.8190 | organism=Trypanosoma_brucei_TREU927 | product=T-complex protein 1, theta subunit, putative,CCT-theta, putative (TCP-1-theta) | location=Tb927_10_v5.1:2036388-2038001(-) | length=537 | sequence_SO=chromosome | SO=protein_coding	0.98699	0.994728	0.990859	0.00580346	1	28	28	28	27	24	27	24	27	24	62.8	62.8	62.8	58.081	537	537	4.81			1	61	15	15	14		0	164.42	0.80764	0.99504	11.313	90	0	Median	0.78204	0.98699	12.854	51	0	Median	0.85622
Tb927.3.960	Tb927.3.960	3	3	3	>Tb927.3.960 | organism=Trypanosoma_brucei_TREU927 | product=protein transport protein Sec61 gamma subunit, putative | location=Tb927_03_v5.1:237829-238038(+) | length=69 | sequence_SO=chromosome | SO=protein_coding	0.95408	1.0277	0.990888	0.0552123	1	3	3	3	2	3	2	3	2	3	47.8	47.8	47.8	7.6681	69	69	8								9	0	12.002	0.86111	0.97305	22.113	8	0	Median	0.76619	0.95408	24.402	4	0	Median	0.89442
Tb927.3.4880	Tb927.3.4880	7	7	7	>Tb927.3.4880 | organism=Trypanosoma_brucei_TREU927 | product=hypothetical protein, conserved | location=Tb927_03_v5.1:1370857-1371405(-) | length=182 | sequence_SO=chromosome | SO=protein_coding	1.0019	0.979912	0.990906	0.0164911	1	7	7	7	6	6	6	6	6	6	43.4	43.4	43.4	20.828	182	182	7							12		0	54.878	0.7936	1.0019	5.9255	8	0	Median	0.78669	1.0019	3.7405	4	0	Median	0.89262
Tb927.6.4370	Tb927.6.4370	19	19	19	>Tb927.6.4370 | organism=Trypanosoma_brucei_TREU927 | product=eukaryotic translation initiation factor 3 subunit 7-like protein | location=Tb927_06_v5.1:1229504-1231024(-) | length=506 | sequence_SO=chromosome | SO=protein_coding	0.9328	1.04908	0.990938	0.0872068	1	19	19	19	15	14	15	14	15	14	49.6	49.6	49.6	57.974	506	506	4.63				24	14			3	0	44.256	0.77182	0.95322	25.991	30	0	Median	0.72907	0.9328	25.686	16	0	Median	0.83901
Tb927.11.18680;Tb11.0845	Tb927.11.18680;Tb11.0845	7;7	7;7	7;7	>Tb927.11.18680 | organism=Trypanosoma_brucei_TREU927 | product=dynein light chain LC8, putative (DYNLL1) | location=Tb927_11_Homologues_1_v5.1:993-1265(-) | length=90 | sequence_SO=chromosome | SO=protein_coding;>Tb11.0845 | organism=Trypanosoma_brucei_TR	1.0134	0.968523	0.990962	0.0336577	2	7	7	7	7	5	7	5	7	5	52.2	52.2	52.2	10.429	90	90;90	7.94							2	31	0	83.071	0.83945	1.0192	11.782	32	0	Median	0.7978	1.0134	9.8777	17	0	Median	0.8736
Tb927.11.1840;Tb11.1380	Tb927.11.1840;Tb11.1380	30;30	30;30	30;30	>Tb927.11.1840 | organism=Trypanosoma_brucei_TREU927 | product=hypothetical protein, conserved | location=Tb927_11_v5.1:546579-547778(-) | length=399 | sequence_SO=chromosome | SO=protein_coding;>Tb11.1380 | organism=Trypanosoma_brucei_TREU927 | product=hy	0.98142	1.00065	0.991035	0.0144228	2	30	30	30	30	27	30	27	30	27	72.4	72.4	72.4	45.633	399	399;399	5.57	1	1	1		69	16	18	7	0	242.59	0.79644	0.99605	18.552	102	0	Median	0.77437	0.98142	18.349	63	0	Median	0.90754
Tb927.11.13360	Tb927.11.13360	9	9	9	>Tb927.11.13360 | organism=Trypanosoma_brucei_TREU927 | product=AAA ATPase, putative | location=Tb927_11_v5.1:3579889-3583734(-) | length=1281 | sequence_SO=chromosome | SO=protein_coding	0.98577	0.996314	0.991042	0.00790773	1	9	9	9	5	5	5	5	5	5	9.8	9.8	9.8	141.17	1281	1281	2.2		9		1					0	18.01	0.84109	0.98982	9.1273	7	0	Median	0.80542	0.98577	10.889	5	0	Median	0.8968
Tb927.8.570	Tb927.8.570	4	4	4	>Tb927.8.570 | organism=Trypanosoma_brucei_TREU927 | product=proteasome regulatory non-ATP-ase subunit 10 | location=Tb927_08_v5.1:162908-163903(-) | length=331 | sequence_SO=chromosome | SO=protein_coding	0.93299	1.04917	0.991082	0.0871386	1	4	4	4	4	2	4	2	4	2	15.7	15.7	15.7	35.778	331	331	6.43					2	4	8		0	46.353	0.73092	0.94231	12.949	12	0	Median	0.72872	0.93299	14.693	9	0	Median	0.79243
Tb927.6.3640	Tb927.6.3640	7	7	7	>Tb927.6.3640 | organism=Trypanosoma_brucei_TREU927 | product=hypothetical protein, conserved | location=Tb927_06_v5.1:1083599-1085284(-) | length=561 | sequence_SO=chromosome | SO=protein_coding	1.0932	0.889047	0.991123	0.153115	1	7	7	7	4	5	4	5	4	5	18.7	18.7	18.7	62.901	561	561	4.17				10	2				0	20.595	0.90461	1.1248	16.026	11	0	Median	0.83924	1.0932	18.69	6	0	Median	0.93654
Tb927.11.14210	Tb927.11.14210	10	10	10	>Tb927.11.14210 | organism=Trypanosoma_brucei_TREU927 | product=hypothetical protein, conserved | location=Tb927_11_v5.1:3766797-3771167(+) | length=1456 | sequence_SO=chromosome | SO=protein_coding	1.0094	0.972952	0.991176	0.027336	1	10	10	10	7	4	7	4	7	4	13	13	13	160.13	1456	1456	1.86	2	12							0	24.893	0.85019	1.0278	10.415	12	0	Median	0.82629	1.0094	11.877	8	0	Median	0.92891
Tb927.3.2900	Tb927.3.2900	15	15	15	>Tb927.3.2900 | organism=Trypanosoma_brucei_TREU927 | product=eukaryotic initiation factor 2a, putative | location=Tb927_03_v5.1:746598-747854(-) | length=418 | sequence_SO=chromosome | SO=protein_coding	0.97655	1.00604	0.991293	0.0221147	1	15	15	15	9	12	9	12	9	12	47.1	47.1	47.1	46.824	418	418	5.23					27	1		2	0	87.472	0.80117	0.98478	17.257	26	0	Median	0.77225	0.97655	10.293	11	0	Median	0.84974
Tb927.2.5980	Tb927.2.5980	67	67	67	>Tb927.2.5980 | organism=Trypanosoma_brucei_TREU927 | product=ATP-dependent Clp protease subunit, heat shock protein 104 (HSP104), putative,atp-dependent chaperone (HSP104) | location=Tb927_02_v5.1:1084458-1087070(+) | length=870 | sequence_SO=chromosome |	0.95202	1.03099	0.991506	0.0592287	1	67	67	67	58	62	58	62	58	62	78	78	78	97.037	870	870	3.2			154	15	4	3	1		0	323.31	0.80107	0.96065	13.184	167	0	Median	0.75009	0.95202	12.077	85	0	Median	0.86039
Tb927.11.13250	Tb927.11.13250	13	13	13	>Tb927.11.13250 | organism=Trypanosoma_brucei_TREU927 | product=eukaryotic translation initiation factor 2 gamma, putative (eIF-2-gamma) | location=Tb927_11_v5.1:3552393-3553826(-) | length=477 | sequence_SO=chromosome | SO=protein_coding	0.95943	1.0236	0.991517	0.0481307	1	13	13	13	11	11	11	11	11	11	41.7	41.7	41.7	52.2	477	477	5.24				1	25	6		1	0	55.815	0.80479	0.96998	25.003	26	0	Median	0.75157	0.95943	21.329	12	0	Median	0.87876
Tb927.11.2370	Tb927.11.2370	3	3	3	>Tb927.11.2370 | organism=Trypanosoma_brucei_TREU927 | product=hypothetical protein, conserved | location=Tb927_11_v5.1:679550-682424(+) | length=575 | sequence_SO=chromosome | SO=protein_coding	1.1057	0.877347	0.991523	0.171265	1	3	3	3	2	2	2	2	2	2	9	9	9	62.541	575	575	4				4					0	3.477	0.93343	1.139	3.414	4	0	Median	0.87551	1.1057	4.9962	2	0	Median	0.97436
Tb927.11.10780	Tb927.11.10780	9	9	9	>Tb927.11.10780 | organism=Trypanosoma_brucei_TREU927 | product=hypothetical protein, conserved | location=Tb927_11_v5.1:2885617-2886456(+) | length=279 | sequence_SO=chromosome | SO=protein_coding	1.0207	0.963113	0.991906	0.0431904	1	9	9	9	7	5	7	5	7	5	49.8	49.8	49.8	30.902	279	279	6.58						5	7		0	22.115	0.82834	1.0294	20.036	12	0	Median	0.80581	1.0207	10.885	7	0	Median	0.94578
Tb927.8.7420;Tb927.4.5000;Tb11.v5.0696	Tb927.8.7420;Tb927.4.5000	17;17;7	17;17;7	17;17;7	>Tb927.8.7420 | organism=Trypanosoma_brucei_TREU927 | product=hypothetical protein, conserved | location=Tb927_08_v5.1:2137644-2140223(+) | length=859 | sequence_SO=chromosome | SO=protein_coding;>Tb927.4.5000 | organism=Trypanosoma_brucei_TREU927 | produc	0.92195	1.06203	0.991992	0.105063	3	17	17	17	13	12	13	12	13	12	27.6	27.6	27.6	96.391	859	859;859;501	3.04			26	1					0	75.156	0.75468	0.92195	13.31	22	0	Median	0.73075	0.92195	9.8602	12	0	Median	0.82144
Tb927.11.2540	Tb927.11.2540	11	11	11	>Tb927.11.2540 | organism=Trypanosoma_brucei_TREU927 | product=hypothetical protein, conserved | location=Tb927_11_v5.1:748077-748970(-) | length=297 | sequence_SO=chromosome | SO=protein_coding	1.0034	0.980584	0.991992	0.0171117	1	11	11	11	9	7	9	7	9	7	44.1	44.1	44.1	33.848	297	297	6.17				1	1	16	3	2	0	37.373	0.82463	1.0034	21.765	20	0	Median	0.78986	1.0034	25.628	14	0	Median	0.88993
Tb927.9.13070	Tb927.9.13070	4	4	4	>Tb927.9.13070 | organism=Trypanosoma_brucei_TREU927 | product=predicted heat shock factor binding protein | location=Tb927_09_v5.1:2069205-2069453(+) | length=82 | sequence_SO=chromosome | SO=protein_coding	1.0235	0.960615	0.992057	0.0471639	1	4	4	4	4	3	4	3	4	3	81.7	81.7	81.7	9.2493	82	82	8								9	0	80.159	0.85935	1.0391	10.509	9	0	Median	0.82408	1.0235	10.396	5	0	Median	0.9305
Tb927.2.470;Tb927.4.220;Tb927.7.1970;Tb927.7.1960;Tb927.7.1950;Tb927.7.1990;Tb927.7.1980;Tb927.7.2030	Tb927.2.470	46;5;2;2;2;2;2;1	9;1;1;1;1;1;1;1	5;1;1;1;1;1;1;1	>Tb927.2.470 | organism=Trypanosoma_brucei_TREU927 | product=retrotransposon hot spot protein 4 (RHS4), putative | location=Tb927_02_v5.1:86881-89463(-) | length=860 | sequence_SO=chromosome | SO=protein_coding	0.9674	1.01673	0.992063	0.0369938	8	46	9	5	40	37	7	8	3	5	52	12.2	8.5	98.316	860	860;345;686;690;690;693;693;688	3.46	5	3	16	7	3	2	3		0	47.976	0.81208	0.98355	18.119	28	0	Median	0.77428	0.9674	17.8	14	0	Median	0.87755
Tb927.10.6800	Tb927.10.6800	15	15	15	>Tb927.10.6800 | organism=Trypanosoma_brucei_TREU927 | product=developmentally regulated GTP-binding protein, putative | location=Tb927_10_v5.1:1715104-1716210(+) | length=368 | sequence_SO=chromosome | SO=protein_coding	0.89507	1.0891	0.992085	0.145522	1	15	15	15	11	9	11	9	11	9	59	59	59	41.267	368	368	6					9	16	1	4	0	78.076	0.75844	0.91057	16.939	24	0	Median	0.69559	0.89507	21.042	14	0	Median	0.79223
Tb927.3.1120	Tb927.3.1120	20	20	20	>Tb927.3.1120 | organism=Trypanosoma_brucei_TREU927 | product=GTP-binding nuclear protein rtb2, putative (rtb2) | location=Tb927_03_v5.1:273590-274243(+) | length=217 | sequence_SO=chromosome | SO=protein_coding	0.98396	1.00022	0.99209	0.012195	1	20	20	20	20	13	20	13	20	13	86.6	86.6	86.6	24.406	217	217	6.46	4					21	47	4	0	131.68	0.79055	0.99193	12.948	66	0	Median	0.77167	0.98396	12.788	38	0	Median	0.84207
Tb927.11.12230	Tb927.11.12230	12	12	12	>Tb927.11.12230 | organism=Trypanosoma_brucei_TREU927 | product=heat shock protein HslVU, ATPase subunit HslU, putative,ATP-dependent hsl protease ATP-binding subunit hslU, putative | location=Tb927_11_v5.1:3270492-3271982(+) | length=496 | sequence_SO=chr	0.98013	1.00413	0.992128	0.0179977	1	12	12	12	8	8	8	8	8	8	32.3	32.3	32.3	54.897	496	496	4.33		1		9	8				0	49.45	0.84115	0.99206	19.659	18	0	Median	0.75866	0.98013	25.387	10	0	Median	0.8727
Tb927.10.5620;Tb11.v5.0531	Tb927.10.5620;Tb11.v5.0531	53;53	53;53	53;53	>Tb927.10.5620 | organism=Trypanosoma_brucei_TREU927 | product=fructose-bisphosphate aldolase, glycosomal (ALD) | location=Tb927_10_v5.1:1404259-1405377(+) | length=372 | sequence_SO=chromosome | SO=protein_coding;>Tb11.v5.0531 | organism=Trypanosoma_bruce	1.0058	0.978474	0.992137	0.0204948	2	53	53	53	51	37	51	37	51	37	94.1	94.1	94.1	41.071	372	372;372	4.88	54	49	51	54	91	179	58	52	0	323.31	0.81695	1.0103	13.26	536	0	Median	0.78626	1.0058	11.03	299	0	Median	0.88283
Tb927.4.3060	Tb927.4.3060	8	8	8	>Tb927.4.3060 | organism=Trypanosoma_brucei_TREU927 | product=hypothetical protein, conserved | location=Tb927_04_v5.1:810076-810522(+) | length=148 | sequence_SO=chromosome | SO=protein_coding	1.005	0.97972	0.99236	0.0189601	1	8	8	8	8	5	8	5	8	5	37.2	37.2	37.2	17.732	148	148	7.3						1	17	9	0	26.899	0.81964	1.0093	8.2782	26	0	Median	0.79606	1.005	5.463	17	0	Median	0.88955
Tb927.7.3120	Tb927.7.3120	3	3	3	>Tb927.7.3120 | organism=Trypanosoma_brucei_TREU927 | product=small nuclear ribonucleoprotein SmD1,SmD-1 like small nuclear ribonucleoprotein (Sm-D1) | location=Tb927_07_v5.1:792434-792754(+) | length=106 | sequence_SO=chromosome | SO=protein_coding	0.97774	1.00741	0.992577	0.0222559	1	3	3	3	2	3	2	3	2	3	45.3	45.3	45.3	11.713	106	106	8								10	0	61.6	0.7905	0.98821	7.6116	9	0	Median	0.77627	0.97774	3.3277	4	0	Median	0.87829
Tb927.9.1960	Tb927.9.1960	6	6	6	>Tb927.9.1960 | organism=Trypanosoma_brucei_TREU927 | product=nitrilase, putative | location=Tb927_09_v5.1:439106-439936(-) | length=273 | sequence_SO=chromosome | SO=protein_coding	1.0791	0.906372	0.992736	0.129546	1	6	6	6	5	4	5	4	5	4	25.3	25.3	25.3	30.298	273	273	6.56						4	5		0	13.929	0.86656	1.0791	5.4219	7	0	Median	0.82925	1.0791	5.7164	3	0	Median	0.94437
Tb927.10.5010	Tb927.10.5010	5	5	5	>Tb927.10.5010 | organism=Trypanosoma_brucei_TREU927 | product=Mitochondrial elongation factor G, putative | location=Tb927_10_v5.1:1240921-1243161(+) | length=746 | sequence_SO=chromosome | SO=protein_coding	1.0259	0.959601	0.99275	0.0497244	1	5	5	5	4	3	4	3	4	3	8.4	8.4	8.4	83.982	746	746	3			7						0	11.849	0.81515	1.0301	9.7711	7	0	Median	0.80527	1.0259	7.2086	4	0	Median	0.89466
Tb927.7.6970;Tb11.v5.0616	Tb927.7.6970;Tb11.v5.0616	11;10	11;10	11;10	>Tb927.7.6970 | organism=Trypanosoma_brucei_TREU927 | product=paraflagellar rod protein, putative | location=Tb927_07_v5.1:1987354-1989420(-) | length=688 | sequence_SO=chromosome | SO=protein_coding;>Tb11.v5.0616 | organism=Trypanosoma_brucei_TREU927 | pr	1.0223	0.963298	0.992799	0.0442512	2	11	11	11	7	8	7	8	7	8	19.3	19.3	19.3	77.214	688	688;678	3.89			2	16					0	47.178	0.82981	1.0314	15.453	14	0	Median	0.79434	1.0223	17.758	8	0	Median	0.90533
Tb927.10.6880;Tb11.v5.0516	Tb927.10.6880;Tb11.v5.0516	27;27	25;25	25;25	>Tb927.10.6880 | organism=Trypanosoma_brucei_TREU927 | product=glyceraldehyde 3-phosphate dehydrogenase, cytosolic (GAP) | location=Tb927_10_v5.1:1730120-1731115(+) | length=331 | sequence_SO=chromosome | SO=protein_coding;>Tb11.v5.0516 | organism=Trypanos	0.99181	0.993937	0.992873	0.00159524	2	27	25	25	21	21	19	19	19	19	92.4	90	90	35.61	331	331;331	6.05	3			2		55	21	1	0	165.34	0.82197	0.9989	14.514	70	0	Median	0.78517	0.99181	11.914	40	0	Median	0.85696
Tb927.11.9420	Tb927.11.9420	15	15	15	>Tb927.11.9420 | organism=Trypanosoma_brucei_TREU927 | product=ATP synthase, putative | location=Tb927_11_v5.1:2582103-2582753(-) | length=216 | sequence_SO=chromosome | SO=protein_coding	0.97292	1.01303	0.992974	0.0300807	1	15	15	15	15	10	15	10	15	10	65.7	65.7	65.7	24.788	216	216	6.83						10	28	3	0	239.68	0.81463	0.98031	14.779	35	0	Median	0.75633	0.97292	9.8426	16	0	Median	0.84584
Tb927.11.6130	Tb927.11.6130	11	11	11	>Tb927.11.6130 | organism=Trypanosoma_brucei_TREU927 | product=S-phase kinase-associated protein, putative,Skp1 family protein, putative,Cyclin A/CDK2-associated protein,Cyclin A/CDK2- associated protein | location=Tb927_11_v5.1:1729404-1729952(-) | length	0.99247	0.993641	0.993055	0.000878025	1	11	11	11	11	8	11	8	11	8	58.8	58.8	58.8	21.125	182	182	7							25		0	101.55	0.79181	0.99635	15.309	23	0	Median	0.76571	0.99247	15.304	12	0	Median	0.8846
Tb927.4.4700	Tb927.4.4700	15	15	15	>Tb927.4.4700 | organism=Trypanosoma_brucei_TREU927 | product=hypothetical protein, conserved | location=Tb927_04_v5.1:1293542-1294351(-) | length=269 | sequence_SO=chromosome | SO=protein_coding	1.0224	0.963763	0.993081	0.0439781	1	15	15	15	12	12	12	12	12	12	62.5	62.5	62.5	30.771	269	269	6.06						30	2		0	117.85	0.84091	1.0303	13.345	31	0	Median	0.79942	1.0224	11.852	18	0	Median	0.9442
Tb927.11.4860	Tb927.11.4860	13	13	13	>Tb927.11.4860 | organism=Trypanosoma_brucei_TREU927 | product=hypothetical protein, conserved | location=Tb927_11_v5.1:1394308-1395708(+) | length=466 | sequence_SO=chromosome | SO=protein_coding	0.97078	1.01541	0.993097	0.0334755	1	13	13	13	12	9	12	9	12	9	41	41	41	52.008	466	466	4.41	1	1	1	20	11		2	1	0	35.869	0.77539	0.97137	18.693	35	0	Median	0.76027	0.97078	22.192	20	0	Median	0.84738
Tb927.7.5230	Tb927.7.5230	13	13	13	>Tb927.7.5230 | organism=Trypanosoma_brucei_TREU927 | product=lanosterol synthase | location=Tb927_07_v5.1:1382167-1384887(+) | length=906 | sequence_SO=chromosome | SO=protein_coding	0.9718	1.0144	0.993102	0.0319534	1	13	13	13	7	12	7	12	7	12	23.1	23.1	23.1	103.03	906	906	2.95		1	19						0	42.139	0.82459	0.97388	13.162	15	0	Median	0.77331	0.9718	9.5891	6	0	Median	0.83683
Tb927.9.11270	Tb927.9.11270	36	36	36	>Tb927.9.11270 | organism=Trypanosoma_brucei_TREU927 | product=T-complex protein 1, eta subunit, putative,t- complex protein 1 (eta subunit), putative (TCP-1-eta) | location=Tb927_09_v5.1:1779935-1781641(+) | length=568 | sequence_SO=chromosome | SO=protei	0.96455	1.02172	0.993136	0.0428789	1	36	36	36	30	36	30	36	30	36	76.2	76.2	76.2	61.471	568	568	4.47		1	2	90	20	5	10	1	0	144.17	0.7913	0.97254	13.448	120	0	Median	0.75204	0.96455	13.993	57	0	Median	0.83642
Tb927.1.4050	Tb927.1.4050	18	18	18	>Tb927.1.4050 | organism=Trypanosoma_brucei_TREU927 | product=protein phosphatase with EF-Hand domains (PPEF),ser/thr protein phosphatase, putative | location=Tb927_01_v5.1:856511-859288(+) | length=925 | sequence_SO=chromosome | SO=protein_coding	1.0021	0.984252	0.993176	0.013386	1	18	18	18	12	14	12	14	12	14	26.1	26.1	26.1	105.75	925	925	3.45			25	5		2	1		0	92.676	0.79998	1.0021	15.583	23	0	Median	0.79478	1.0021	9.0423	13	0	Median	0.85661
Tb927.6.4000	Tb927.6.4000	15	15	15	>Tb927.6.4000 | organism=Trypanosoma_brucei_TREU927 | product=small glutamine-rich tetratricopeptide repeat protein, putative (SGT) | location=Tb927_06_v5.1:1172982-1174232(-) | length=416 | sequence_SO=chromosome | SO=protein_coding	1.0194	0.967118	0.993259	0.0392115	1	15	15	15	12	13	12	13	12	13	49	49	49	45.966	416	416	5.57					13	17			0	145.73	0.84499	1.0222	13.413	27	0	Median	0.7764	1.0194	16.558	13	0	Median	0.93106
Tb927.2.4580	Tb927.2.4580	8	8	8	>Tb927.2.4580 | organism=Trypanosoma_brucei_TREU927 | product=UNC119 | location=Tb927_02_v5.1:814961-815551(-) | length=196 | sequence_SO=chromosome | SO=protein_coding	1.0003	0.986388	0.993344	0.0104341	1	8	8	8	6	7	6	7	6	7	56.6	56.6	56.6	22.66	196	196	7.05							18	1	0	73.366	0.82346	1.0009	14.55	18	0	Median	0.79307	1.0003	11.53	10	0	Median	0.88477
Tb927.7.3530	Tb927.7.3530	5	5	5	>Tb927.7.3530 | organism=Trypanosoma_brucei_TREU927 | product=hypothetical protein, conserved | location=Tb927_07_v5.1:909920-912808(-) | length=691 | sequence_SO=chromosome | SO=protein_coding	0.96995	1.01686	0.993405	0.0351821	1	5	5	5	3	2	3	2	3	2	8.1	8.1	8.1	77.548	691	691	4				5					0	9.717	0.802	0.96995	12.346	4	0	Median	0.77254	0.96995	11.185	2	0	Median	0.84498
Tb927.3.4760	Tb927.3.4760	43	7	7	>Tb927.3.4760 | organism=Trypanosoma_brucei_TREU927 | product=dynamin, putative,vacuolar sortin protein 1, putative | location=Tb927_03_v5.1:1342547-1344529(-) | length=660 | sequence_SO=chromosome | SO=protein_coding	1.0328	0.954198	0.993499	0.0589511	1	43	7	7	38	34	6	4	6	4	77.1	14.4	14.4	73.148	660	660	4				10					0	25.069	0.84241	1.0478	10.016	9	0	Median	0.81772	1.0328	5.6897	6	0	Median	0.87599
Tb927.3.1740	Tb927.3.1740	12	12	12	>Tb927.3.1740 | organism=Trypanosoma_brucei_TREU927 | product=hypothetical protein, conserved | location=Tb927_03_v5.1:453125-455176(-) | length=683 | sequence_SO=chromosome | SO=protein_coding	1.0066	0.980488	0.993544	0.0195838	1	12	12	12	10	7	10	7	10	7	29.3	29.3	29.3	76.97	683	683	4				19					0	24.049	0.84714	1.0199	12.936	17	0	Median	0.80001	1.0066	14.804	10	0	Median	0.92017
Tb927.10.15850;Tb11.v5.0427	Tb927.10.15850;Tb11.v5.0427	6;6	6;6	6;6	>Tb927.10.15850 | organism=Trypanosoma_brucei_TREU927 | product=peroxin 12 (PEX12) | location=Tb927_10_v5.1:3912283-3913470(+) | length=395 | sequence_SO=chromosome | SO=protein_coding;>Tb11.v5.0427 | organism=Trypanosoma_brucei_TREU927 | product=peroxisom	0.89268	1.09459	0.993637	0.151436	2	6	6	6	6	4	6	4	6	4	22	22	22	43.172	395	395;395	5.8					4	5		1	0	11.873	0.72669	0.90544	13.105	9	0	Median	0.70345	0.89268	12.97	6	0	Median	0.83485
Tb927.11.13780	Tb927.11.13780	10	10	10	>Tb927.11.13780 | organism=Trypanosoma_brucei_TREU927 | product=profilin | location=Tb927_11_v5.1:3673050-3673502(+) | length=150 | sequence_SO=chromosome | SO=protein_coding	0.98398	1.0034	0.993691	0.0145661	1	10	10	10	10	7	10	7	10	7	64	64	64	16.122	150	150	7.96							1	25	0	179.21	0.80133	0.98398	10.798	26	0	Median	0.78249	0.98398	7.3932	14	0	Median	0.85265
Tb927.10.2950	Tb927.10.2950	9	9	9	>Tb927.10.2950 | organism=Trypanosoma_brucei_TREU927 | product=hypothetical protein, conserved | location=Tb927_10_v5.1:766784-772387(+) | length=1867 | sequence_SO=chromosome | SO=protein_coding	1.0363	0.951294	0.993797	0.0637547	1	9	9	9	4	7	4	7	4	7	6.7	6.7	6.7	206.8	1867	1867	2.29	2	9	1	1	1				0	38.801	0.88458	1.0512	11.316	14	0	Median	0.8209	1.0363	12.536	6	0	Median	0.91163
Tb927.10.390	Tb927.10.390	10	10	10	>Tb927.10.390 | organism=Trypanosoma_brucei_TREU927 | product=hypothetical protein, conserved | location=Tb927_10_v5.1:104432-104881(+) | length=149 | sequence_SO=chromosome | SO=protein_coding	1.0177	0.969932	0.993816	0.0358259	1	10	10	10	10	6	10	6	10	6	77.2	77.2	77.2	16.343	149	149	8								20	0	123.04	0.82757	1.0242	8.0666	20	0	Median	0.81443	1.0177	8.527	13	0	Median	0.8441
Tb927.11.11550;Tb927.11.11540	Tb927.11.11550;Tb927.11.11540	31;21	31;21	31;21	>Tb927.11.11550 | organism=Trypanosoma_brucei_TREU927 | product=DNA topoisomerase II, putative | location=Tb927_11_v5.1:3091579-3095946(+) | length=1455 | sequence_SO=chromosome | SO=protein_coding;>Tb927.11.11540 | organism=Trypanosoma_brucei_TREU927 | pr	0.97252	1.01513	0.993823	0.031954	2	31	31	31	23	20	23	20	23	20	27.3	27.3	27.3	164.65	1455	1455;1424	1.95	8	43	3	1					0	115.95	0.81013	0.97879	17.22	46	0	Median	0.78393	0.97252	13.712	29	0	Median	0.83658
Tb927.10.9150	Tb927.10.9150	4	4	4	>Tb927.10.9150 | organism=Trypanosoma_brucei_TREU927 | product=hypothetical protein, conserved | location=Tb927_10_v5.1:2266922-2267824(+) | length=300 | sequence_SO=chromosome | SO=protein_coding	0.95111	1.03657	0.99384	0.0640951	1	4	4	4	3	2	3	2	3	2	27	27	27	33.243	300	300	6.6						2	3		0	9.6038	0.80838	0.95111	17.884	5	0	Median	0.74172	0.95111	25.096	3	0	Median	0.81966
Tb927.4.1080	Tb927.4.1080	32	32	32	>Tb927.4.1080 | organism=Trypanosoma_brucei_TREU927 | product=V-type ATPase, A subunit, putative | location=Tb927_04_v5.1:288344-290176(-) | length=610 | sequence_SO=chromosome | SO=protein_coding	1.0158	0.971912	0.993856	0.0329162	1	32	32	32	31	29	31	29	31	29	70.2	70.2	70.2	67.749	610	610	4.61				81	11	5	16		0	209.6	0.8336	1.0164	11.797	100	0	Median	0.78803	1.0158	10.316	55	0	Median	0.88542
Tb927.7.280	Tb927.7.280	7	7	7	>Tb927.7.280 | organism=Trypanosoma_brucei_TREU927 | product=cyclophilin-type peptidyl-prolyl cis-trans isomerase, putative (PPIase) | location=Tb927_07_v5.1:49568-50314(+) | length=225 | sequence_SO=chromosome | SO=protein_coding	1.0408	0.94697	0.993885	0.0703727	1	7	7	7	6	2	6	2	6	2	46.2	46.2	46.2	24.302	225	225	7							9		0	10.905	0.83394	1.0441	16.365	8	0	Median	0.80591	1.0408	18.873	6	0	Median	0.9097
Tb927.6.940	Tb927.6.940	6	6	1	>Tb927.6.940 | organism=Trypanosoma_brucei_TREU927 | product=metacaspase MCA2 (MCA2) | location=Tb927_06_v5.1:398695-399738(-) | length=347 | sequence_SO=chromosome | SO=protein_coding	1.0106	0.977231	0.993915	0.0250271	1	6	6	1	6	2	6	2	1	1	24.5	24.5	2.6	37.779	347	347	6						10			0	11.657	0.82154	1.0338	16.807	9	0	Median	0.80305	1.0106	17.949	8	0	Median	0.88361
Tb927.11.16670	Tb927.11.16670	3	3	3	>Tb927.11.16670 | organism=Trypanosoma_brucei_TREU927 | product=hypothetical protein, conserved | location=Tb927_11_v5.1:4433087-4434799(-) | length=570 | sequence_SO=chromosome | SO=protein_coding	0.94528	1.04256	0.993919	0.0729579	1	3	3	3	3	3	3	3	3	3	8.8	8.8	8.8	63.505	570	570	4				6					0	9.1303	0.76172	0.9522	8.8709	6	0	Median	0.74919	0.94528	1.5247	3	0	Median	0.87368
Tb927.5.2930	Tb927.5.2930	15	15	15	>Tb927.5.2930 | organism=Trypanosoma_brucei_TREU927 | product=hypothetical protein, conserved | location=Tb927_05_v5.1:982813-983925(+) | length=370 | sequence_SO=chromosome | SO=protein_coding	1.0651	0.922765	0.993932	0.106752	1	15	15	15	14	8	14	8	14	8	39.7	39.7	39.7	43.308	370	370	5.62					9	15			0	69.735	0.85882	1.0658	11.343	21	0	Median	0.85063	1.0651	12.479	14	0	Median	0.97976
Tb927.6.4480	Tb927.6.4480	49	49	49	>Tb927.6.4480 | organism=Trypanosoma_brucei_TREU927 | product=valyl-tRNA synthetase, putative (ValRS) | location=Tb927_06_v5.1:1256976-1259903(-) | length=975 | sequence_SO=chromosome | SO=protein_coding	0.96821	1.0201	0.994153	0.0389144	1	49	49	49	41	45	41	45	41	45	60.4	60.4	60.4	110.92	975	975	3.47		2	102	29	1	2	8		0	305.58	0.81672	0.97544	13.838	121	0	Median	0.76155	0.96821	15.768	56	0	Median	0.84724
Tb927.10.6050;Tb11.v5.0198;Tb11.v5.0197	Tb927.10.6050;Tb11.v5.0198	120;66;50	120;66;50	120;66;50	>Tb927.10.6050 | organism=Trypanosoma_brucei_TREU927 | product=clathrin heavy chain (CHC) | location=Tb927_10_v5.1:1521816-1526927(-) | length=1703 | sequence_SO=chromosome | SO=protein_coding;>Tb11.v5.0198 | organism=Trypanosoma_brucei_TREU927 | product=c	1.0153	0.973047	0.994173	0.03169	3	120	120	120	115	113	115	113	115	113	76.9	76.9	76.9	190.62	1703	1703;835;850	3.08	199	301	220	188	71	71	39	18	0	323.31	0.84474	1.0218	12.414	994	0	Median	0.8049	1.0153	11.932	526	0	Median	0.90088
Tb927.11.2570	Tb927.11.2570	10	10	10	>Tb927.11.2570 | organism=Trypanosoma_brucei_TREU927 | product=hypothetical protein, conserved | location=Tb927_11_v5.1:753723-755462(-) | length=573 | sequence_SO=chromosome | SO=protein_coding	1.0116	0.976753	0.994177	0.026135	1	10	10	10	10	3	10	3	10	3	20.9	20.9	20.9	63.115	573	573	4.29				12		2			0	21.222	0.79985	1.0174	22.191	13	0	Median	0.79924	1.0116	24.545	10	0	Median	0.84748
Tb927.10.6490	Tb927.10.6490	13	13	13	>Tb927.10.6490 | organism=Trypanosoma_brucei_TREU927 | product=hypothetical protein, conserved | location=Tb927_10_v5.1:1644685-1645170(+) | length=161 | sequence_SO=chromosome | SO=protein_coding	1.0124	0.976086	0.994243	0.0272356	1	13	13	13	12	9	12	9	12	9	65.2	65.2	65.2	19.53	161	161	7							24		0	34.914	0.79398	1.0184	14.162	20	0	Median	0.77011	1.0124	12.488	13	0	Median	0.9118
Tb927.11.5520	Tb927.11.5520	18	18	18	>Tb927.11.5520 | organism=Trypanosoma_brucei_TREU927 | product=triosephosphate isomerase (TIM) | location=Tb927_11_v5.1:1567338-1568090(+) | length=250 | sequence_SO=chromosome | SO=protein_coding	0.98374	1.00475	0.994246	0.0157594	1	18	18	18	17	15	17	15	17	15	64	64	64	26.819	250	250	6.24	7	3	1	2		13	56	10	0	212.5	0.79148	0.98532	10.615	83	0	Median	0.77262	0.98374	7.7288	48	0	Median	0.84504
Tb927.9.10770	Tb927.9.10770	42	42	42	>Tb927.9.10770 | organism=Trypanosoma_brucei_TREU927 | product=Polyadenylate-binding protein 2 (Poly(A)-binding protein 2) (Poly(A)-binding protein II) (PABII) (Polyadenylate-binding nuclear protein 1) (Nuclear poly(A)-binding protein 1) (PABP2), putative	0.97725	1.01131	0.994278	0.0255423	1	42	42	42	38	37	38	37	38	37	69.5	69.5	69.5	62.147	555	555	4.97	3	4	14	90	58	42	21	17	0	291.74	0.8004	0.98449	9.932	219	0	Median	0.76642	0.97725	10.032	135	0	Median	0.84815
Tb927.1.4900;Tb927.1.5110;Tb927.3.560;Tb927.9.7400;Tb927.9.7320;Tb927.3.5820	Tb927.1.4900;Tb927.1.5110	4;3;1;1;1;1	4;3;1;1;1;1	4;3;1;1;1;1	>Tb927.1.4900 | organism=Trypanosoma_brucei_TREU927 | product=expression site-associated gene 11 (ESAG11) protein, putative | location=Tb927_01_v5.1:993544-994662(+) | length=372 | sequence_SO=chromosome | SO=protein_coding;>Tb927.1.5110 | organism=Trypano	0.96352	1.02525	0.994386	0.046299	6	4	4	4	2	4	2	4	2	4	12.6	12.6	12.6	40.662	372	372;364;367;371;371;372	5					6				0	10.145	0.8283	0.97537	23.024	6	0	Median	0.74987	0.96352	32.091	2	0	Median	0.86247
Tb927.10.650	Tb927.10.650	8	8	8	>Tb927.10.650 | organism=Trypanosoma_brucei_TREU927 | product=TAX-2 | location=Tb927_10_v5.1:173390-174052(+) | length=220 | sequence_SO=chromosome | SO=protein_coding	1.0088	0.980104	0.994452	0.0215221	1	8	8	8	8	2	8	2	8	2	56.4	56.4	56.4	25.588	220	220	6.83						2	10		0	28.801	0.79383	1.0088	16.202	11	0	Median	0.79383	1.0088	17.171	9	0	Median	0.85179
Tb927.9.7180	Tb927.9.7180	15	15	15	>Tb927.9.7180 | organism=Trypanosoma_brucei_TREU927 | product=adenosine monophosphate deaminase, putative,AMP deaminase, putative | location=Tb927_09_v5.1:1163295-1168367(+) | length=1690 | sequence_SO=chromosome | SO=protein_coding	0.95979	1.02926	0.994526	0.0521039	1	15	15	15	10	10	10	10	10	10	12.7	12.7	12.7	189.71	1690	1690	2.3		17	5	1					0	35.273	0.79475	0.96722	15.625	16	0	Median	0.76536	0.95979	14.685	9	0	Median	0.86157
Tb927.6.2940	Tb927.6.2940	6	6	6	>Tb927.6.2940 | organism=Trypanosoma_brucei_TREU927 | product=hypothetical protein, conserved | location=Tb927_06_v5.1:879758-880606(+) | length=251 | sequence_SO=chromosome | SO=protein_coding	0.96089	1.02825	0.994568	0.0505169	1	6	6	6	6	3	6	3	6	3	41	41	41	27.586	251	251	6.64						4	7		0	89.56	0.80563	0.97253	13.696	10	0	Median	0.74596	0.96089	16.374	6	0	Median	0.8556
Tb927.2.3780	Tb927.2.3780	21	21	21	>Tb927.2.3780 | organism=Trypanosoma_brucei_TREU927 | product=translation initiation factor IF-2, putative | location=Tb927_02_v5.1:673003-675504(-) | length=833 | sequence_SO=chromosome | SO=protein_coding	0.95639	1.03293	0.99466	0.0574049	1	21	21	21	17	19	17	19	17	19	34.7	34.7	34.7	94.472	833	833	3.02		1	38	2					0	94.663	0.79913	0.96471	15.009	36	0	Median	0.73321	0.95639	19.34	17	0	Median	0.84644
Tb927.8.2280;Tb927.8.2260	Tb927.8.2280;Tb927.8.2260	12;12	12;12	2;2	>Tb927.8.2280 | organism=Trypanosoma_brucei_TREU927 | product=hypothetical protein, conserved | location=Tb927_08_v5.1:695485-696084(+) | length=199 | sequence_SO=chromosome | SO=protein_coding;>Tb927.8.2260 | organism=Trypanosoma_brucei_TREU927 | product=	1.009	0.980488	0.994744	0.0213838	2	12	12	2	11	10	11	10	2	1	77.9	77.9	4.5	21.768	199	199;199	7.22						5	33	17	0	41.223	0.79371	1.0148	12.278	53	0	Median	0.77551	1.009	10.094	33	0	Median	0.84412
Tb927.3.3780;Tb927.3.3760	Tb927.3.3780;Tb927.3.3760	15;14	15;14	15;14	>Tb927.3.3780 | organism=Trypanosoma_brucei_TREU927 | product=tryparedoxin | location=Tb927_03_v5.1:1053583-1054017(+) | length=144 | sequence_SO=chromosome | SO=protein_coding;>Tb927.3.3760 | organism=Trypanosoma_brucei_TREU927 | product=tryparedoxin (TRY	0.99619	0.993443	0.994817	0.00206004	2	15	15	15	14	10	14	10	14	10	99.3	99.3	99.3	15.891	144	144;144	7.07	5	3		1			5	53	0	127.77	0.82203	0.99619	11.093	56	0	Median	0.8087	0.99619	10.152	38	0	Median	0.87379
Tb927.10.2900;Tb11.v5.0837	Tb927.10.2900;Tb11.v5.0837	21;15	21;15	21;15	>Tb927.10.2900 | organism=Trypanosoma_brucei_TREU927 | product=importin beta-1 subunit, putative | location=Tb927_10_v5.1:748683-751283(+) | length=866 | sequence_SO=chromosome | SO=protein_coding;>Tb11.v5.0837 | organism=Trypanosoma_brucei_TREU927 | produ	0.97053	1.01917	0.99485	0.0364804	2	21	21	21	15	20	15	20	15	20	32.2	32.2	32.2	95.068	866	866;575	3.29			40	3				2	0	151.23	0.82378	0.97719	20.783	36	0	Median	0.7799	0.97053	21.87	16	0	Median	0.86226
Tb927.11.4910	Tb927.11.4910	11	11	11	>Tb927.11.4910 | organism=Trypanosoma_brucei_TREU927 | product=predicted ankyrin repeat family protein | location=Tb927_11_v5.1:1402909-1404087(+) | length=392 | sequence_SO=chromosome | SO=protein_coding	0.89836	1.0915	0.99493	0.144855	1	11	11	11	10	8	10	8	10	8	40.1	40.1	40.1	43.647	392	392	5.59					9	13			0	55.643	0.72752	0.90205	8.4925	19	0	Median	0.7142	0.89836	8.0164	12	0	Median	0.82614
Tb927.9.11110	Tb927.9.11110	14	14	14	>Tb927.9.11110 | organism=Trypanosoma_brucei_TREU927 | product=PRP8 protein homologue,U5 snRNA-associated splicing factor | location=Tb927_09_v5.1:1753411-1760622(-) | length=2403 | sequence_SO=chromosome | SO=protein_coding	1.008	0.981932	0.994966	0.0195507	1	14	14	14	8	11	8	11	8	11	7.2	7.2	7.2	277	2403	2403	1.43	12	9							0	80.219	0.84872	1.0132	20.03	18	0	Median	0.82841	1.008	15.616	9	0	Median	0.90181
Tb927.7.1780	Tb927.7.1780	11	11	11	>Tb927.7.1780 | organism=Trypanosoma_brucei_TREU927 | product=Adenine phosphoribosyltransferase, putative | location=Tb927_07_v5.1:436819-437526(+) | length=235 | sequence_SO=chromosome | SO=protein_coding	0.92214	1.06783	0.994984	0.109266	1	11	11	11	7	10	7	10	7	10	60	60	60	25.973	235	235	7.05							21	1	0	85.013	0.80023	0.93359	11.343	21	0	Median	0.72848	0.92214	13.236	8	0	Median	0.82411
Tb927.10.1060	Tb927.10.1060	33	33	33	>Tb927.10.1060 | organism=Trypanosoma_brucei_TREU927 | product=T-complex protein 1, delta subunit, putative (TCP-1-delta) | location=Tb927_10_v5.1:285416-287026(-) | length=536 | sequence_SO=chromosome | SO=protein_coding	1.0013	0.988826	0.995063	0.0093553	1	33	33	33	31	30	31	30	31	30	64.6	64.6	64.6	58.361	536	536	4.69				45	68	4	2		0	184.58	0.81256	1.0086	13.237	102	0	Median	0.77762	1.0013	12.776	47	0	Median	0.87332
Tb927.11.11980	Tb927.11.11980	19	19	19	>Tb927.11.11980 | organism=Trypanosoma_brucei_TREU927 | product=microtubule-associated protein,corset-associated protein 15 (CAP15) | location=Tb927_11_v5.1:3216090-3216455(+) | length=121 | sequence_SO=chromosome | SO=protein_coding	0.9669	1.02327	0.995085	0.0422769	1	19	19	19	18	15	18	15	18	15	66.1	66.1	66.1	14.091	121	121	7.83						1	14	77	0	162.16	0.77111	0.97319	25.33	80	0	Median	0.75704	0.9669	32.487	45	0	Median	0.82868
Tb927.8.8330	Tb927.8.8330	41	41	29	>Tb927.8.8330 | organism=Trypanosoma_brucei_TREU927 | product=calpain, putative,cysteine peptidase, putative | location=Tb927_08_v5.1:2466411-2469077(+) | length=888 | sequence_SO=chromosome | SO=protein_coding	0.97792	1.01229	0.995105	0.0257769	1	41	41	29	40	35	40	35	28	26	51.1	51.1	38.1	98.456	888	888	2.97	20	114	92	44	12	9	4	7	0	323.31	0.80665	0.98211	12.322	279	0	Median	0.77706	0.97792	11.483	146	0	Median	0.87121
Tb927.7.1310	Tb927.7.1310	20	20	20	>Tb927.7.1310 | organism=Trypanosoma_brucei_TREU927 | product=hypothetical protein, conserved | location=Tb927_07_v5.1:336723-340766(+) | length=1347 | sequence_SO=chromosome | SO=protein_coding	0.97102	1.01919	0.995106	0.0361285	1	20	20	20	19	9	19	9	19	9	22.4	22.4	22.4	152.52	1347	1347	2.5		22	16	2					0	57.489	0.81244	0.97102	14.724	33	0	Median	0.77725	0.97102	12.313	21	0	Median	0.89077
Tb927.10.15280;Tb11.v5.0999	Tb927.10.15280;Tb11.v5.0999	16;12	16;12	16;12	>Tb927.10.15280 | organism=Trypanosoma_brucei_TREU927 | product=hypothetical protein, conserved | location=Tb927_10_v5.1:3726748-3730341(+) | length=1197 | sequence_SO=chromosome | SO=protein_coding;>Tb11.v5.0999 | organism=Trypanosoma_brucei_TREU927 | pro	1.0646	0.92584	0.99522	0.10407	2	16	16	16	14	6	14	6	14	6	20.5	20.5	20.5	131.3	1197	1197;951	2		21							0	47.723	0.90574	1.0646	20.676	19	0	Median	0.84346	1.0646	22.587	13	0	Median	0.96291
Tb927.8.4500;Tb11.v5.0763	Tb927.8.4500;Tb11.v5.0763	26;22	26;22	26;22	>Tb927.8.4500 | organism=Trypanosoma_brucei_TREU927 | product=eukaryotic translation initation factor 4 gamma, putative | location=Tb927_08_v5.1:1329879-1332128(-) | length=749 | sequence_SO=chromosome | SO=protein_coding;>Tb11.v5.0763 | organism=Trypanoso	0.94431	1.04627	0.995288	0.0764669	2	26	26	26	23	22	23	22	23	22	45	45	45	84.574	749	749;565	3.6			26	39					0	92.949	0.7671	0.94453	11.79	55	0	Median	0.73645	0.94431	13.045	30	0	Median	0.83495
Tb927.10.10010	Tb927.10.10010	10	10	10	>Tb927.10.10010 | organism=Trypanosoma_brucei_TREU927 | product=60S acidic ribosomal protein, putative | location=Tb927_10_v5.1:2468708-2469388(+) | length=226 | sequence_SO=chromosome | SO=protein_coding	0.95369	1.03703	0.995361	0.0625068	1	10	10	10	6	8	6	8	6	8	50.9	50.9	50.9	25.628	226	226	7							15		0	67.488	0.80268	0.95897	17.422	14	0	Median	0.76442	0.95369	8.1841	5	0	Median	0.80481
Tb927.7.1130	Tb927.7.1130	11	11	3	>Tb927.7.1130 | organism=Trypanosoma_brucei_TREU927 | product=trypanothione/tryparedoxin dependent peroxidase 2,glutathione peroxidase-like 2 (TDPX2) | location=Tb927_07_v5.1:291056-291738(+) | length=169 | sequence_SO=chromosome | SO=protein_coding	1.004	0.986777	0.995389	0.0129171	1	11	11	3	11	10	11	10	3	3	66.3	66.3	29	18.873	169	169	7.29							24	10	0	60.625	0.79755	1.0048	11.342	31	0	Median	0.77719	1.004	13.146	19	0	Median	0.84195
Tb927.11.3650;Tb11.v5.0435	Tb927.11.3650;Tb11.v5.0435	53;53	53;53	53;53	>Tb927.11.3650 | organism=Trypanosoma_brucei_TREU927 | product=adenylosuccinate synthetase, putative | location=Tb927_11_v5.1:1075346-1077154(+) | length=602 | sequence_SO=chromosome | SO=protein_coding;>Tb11.v5.0435 | organism=Trypanosoma_brucei_TREU927 |	0.99746	0.993345	0.995402	0.00308656	2	53	53	53	50	44	50	44	50	44	87.9	87.9	87.9	66.674	602	602;602	4.43	4	1	4	139	19	9	19	2	0	247.01	0.81655	0.99835	11.19	167	0	Median	0.78784	0.99746	10.567	93	0	Median	0.86294
Tb927.1.1560;Tb11.v5.0464;Tb927.11.8350	Tb927.1.1560;Tb11.v5.0464	20;20;1	20;20;1	19;19;0	>Tb927.1.1560 | organism=Trypanosoma_brucei_TREU927 | product=vesicular-fusion protein nsf, putative,N-ethylmaleimide sensitive factor (NsF) | location=Tb927_01_v5.1:399676-401853(+) | length=725 | sequence_SO=chromosome | SO=protein_coding;>Tb11.v5.0464 |	1.019	0.971817	0.995409	0.035387	3	20	20	19	18	17	18	17	17	16	37.4	37.4	35.7	79.953	725	725;725;554	4.22				36	2	2	1		0	76.22	0.82883	1.019	12.987	37	0	Median	0.79739	1.019	13.091	19	0	Median	0.87326
Tb927.8.3870;Tb11.v5.0681	Tb927.8.3870;Tb11.v5.0681	10;6	10;6	10;6	>Tb927.8.3870 | organism=Trypanosoma_brucei_TREU927 | product=hypothetical protein, conserved | location=Tb927_08_v5.1:1151921-1156841(-) | length=1205 | sequence_SO=chromosome | SO=protein_coding;>Tb11.v5.0681 | organism=Trypanosoma_brucei_TREU927 | produ	0.99394	0.997407	0.995673	0.00260006	2	10	10	10	9	8	9	8	9	8	10	10	10	127.73	1205	1205;455	1.58	8	11							0	59.017	0.81752	1	10.103	15	0	Median	0.7895	0.99394	11.749	9	0	Median	0.859
Tb927.8.1960	Tb927.8.1960	8	8	8	>Tb927.8.1960 | organism=Trypanosoma_brucei_TREU927 | product=hypothetical protein, conserved | location=Tb927_08_v5.1:629740-631044(+) | length=434 | sequence_SO=chromosome | SO=protein_coding	1.0171	0.974659	0.995879	0.0318308	1	8	8	8	8	7	8	7	8	7	22.8	22.8	22.8	48.425	434	434	5.82					16	5	3	4	0	65.936	0.86258	1.0258	12.387	21	0	Median	0.81506	1.0171	14.201	14	0	Median	0.90625
Tb927.11.1980	Tb927.11.1980	28	28	28	>Tb927.11.1980 | organism=Trypanosoma_brucei_TREU927 | product=zinc finger protein family member, putative (ZC3H41) | location=Tb927_11_v5.1:574332-575885(+) | length=517 | sequence_SO=chromosome | SO=protein_coding	1.011	0.981162	0.996081	0.0223787	1	28	28	28	22	26	22	26	22	26	61.9	61.9	61.9	58.459	517	517	4.94				44	34	19	2	5	0	127.6	0.83596	1.0132	15.283	91	0	Median	0.79149	1.011	17.524	50	0	Median	0.87761
Tb927.8.1600	Tb927.8.1600	38	38	38	>Tb927.8.1600 | organism=Trypanosoma_brucei_TREU927 | product=lysyl-tRNA synthetase, putative | location=Tb927_08_v5.1:530903-533165(+) | length=584 | sequence_SO=chromosome | SO=protein_coding	0.9709	1.02143	0.996165	0.0378972	1	38	38	38	33	35	33	35	33	35	59.9	59.9	59.9	66.786	584	584	4.05				85				1	0	140.79	0.80834	0.97114	12.425	83	0	Median	0.75717	0.9709	14.133	41	0	Median	0.84407
Tb927.11.7740	Tb927.11.7740	7	7	7	>Tb927.11.7740 | organism=Trypanosoma_brucei_TREU927 | product=dynein light chain, putative | location=Tb927_11_v5.1:2193398-2193745(-) | length=115 | sequence_SO=chromosome | SO=protein_coding	1.009	0.983478	0.996239	0.0191418	1	7	7	7	7	4	7	4	7	4	48.7	48.7	48.7	13.077	115	115	8								16	0	34.84	0.84208	1.0168	19.545	15	0	Median	0.79837	1.009	23.696	10	0	Median	0.84385
Tb927.3.5180	Tb927.3.5180	11	11	11	>Tb927.3.5180 | organism=Trypanosoma_brucei_TREU927 | product=cofilin/actin depolymerizing factor, putative | location=Tb927_03_v5.1:1453906-1454316(+) | length=136 | sequence_SO=chromosome | SO=protein_coding	0.98688	1.00567	0.996276	0.014094	1	11	11	11	11	10	11	10	11	10	83.1	83.1	83.1	15.119	136	136	7.78	1						2	38	0	236.55	0.82785	0.99352	18.298	38	0	Median	0.79276	0.98688	21.576	23	0	Median	0.88414
Tb927.11.7940	Tb927.11.7940	3	3	3	>Tb927.11.7940 | organism=Trypanosoma_brucei_TREU927 | product=calmodulin, putative | location=Tb927_11_v5.1:2239115-2239604(-) | length=154 | sequence_SO=chromosome | SO=protein_coding	1.0301	0.962464	0.996282	0.0507271	1	3	3	3	3	1	3	1	3	1	27.9	27.9	27.9	17.786	154	154	7.8							1	4	0	12.94	0.87248	1.0301	13.172	5	0	Median	0.82843	1.0301	16.977	3	0	Median	0.93928
Tb927.7.840	Tb927.7.840	4	4	4	>Tb927.7.840 | organism=Trypanosoma_brucei_TREU927 | product=hypothetical protein, conserved | location=Tb927_07_v5.1:200191-200565(-) | length=124 | sequence_SO=chromosome | SO=protein_coding	1.1214	0.871232	0.996316	0.187626	1	4	4	4	3	2	3	2	3	2	35.5	35.5	35.5	14.51	124	124	8								7	0	13.623	0.8947	1.0729	30.526	3	0	Median	0.87895	1.1214	25.504	3	2	Plateau	0.95674
Tb927.11.2380	Tb927.11.2380	12	12	12	>Tb927.11.2380 | organism=Trypanosoma_brucei_TREU927 | product=phosphoglycerate kinase, putative | location=Tb927_11_v5.1:684322-687063(+) | length=913 | sequence_SO=chromosome | SO=protein_coding	0.91295	1.07975	0.99635	0.1251	1	12	12	12	6	9	6	9	6	9	19.7	19.7	19.7	100.85	913	913	3.06			15	1					0	17.307	0.77527	0.91952	29.443	12	0	Median	0.70459	0.91295	19.642	5	0	Median	0.78871
Tb927.11.4880	Tb927.11.4880	5	5	5	>Tb927.11.4880 | organism=Trypanosoma_brucei_TREU927 | product=hypothetical protein, conserved | location=Tb927_11_v5.1:1397075-1397950(+) | length=274 | sequence_SO=chromosome | SO=protein_coding	1.0111	0.981643	0.996372	0.0220925	1	5	5	5	4	3	4	3	4	3	29.9	29.9	29.9	30.214	274	274	6.12						7	1		0	16.174	0.81438	1.0149	6.0373	8	0	Median	0.7857	1.0111	5.9569	5	0	Median	0.87142
Tb927.10.1890	Tb927.10.1890	15	15	15	>Tb927.10.1890 | organism=Trypanosoma_brucei_TREU927 | product=calpain, putative,cysteine peptidase, Clan CA, family C2, putative | location=Tb927_10_v5.1:489021-493805(+) | length=1594 | sequence_SO=chromosome | SO=protein_coding	0.93443	1.05835	0.996388	0.0929375	1	15	15	15	10	8	10	8	10	8	12.9	12.9	12.9	178.09	1594	1594	1.91	6	14	2	1					0	37.925	0.75244	0.94487	27.053	19	0	Median	0.74901	0.93443	28.463	12	0	Median	0.78024
Tb927.9.2010	Tb927.9.2010	11	11	11	>Tb927.9.2010 | organism=Trypanosoma_brucei_TREU927 | product=kynureninase, putative | location=Tb927_09_v5.1:453131-454945(-) | length=463 | sequence_SO=chromosome | SO=protein_coding	1.0251	0.96768	0.99639	0.0430654	1	11	11	11	8	8	8	8	8	8	32.2	32.2	32.2	50.684	463	463	4.6			2	6	17				0	65.489	0.86127	1.0293	14.444	23	0	Median	0.78991	1.0251	14.978	12	0	Median	0.94279
Tb927.10.12410	Tb927.10.12410	17	17	17	>Tb927.10.12410 | organism=Trypanosoma_brucei_TREU927 | product=hypothetical protein, conserved | location=Tb927_10_v5.1:3008951-3009637(-) | length=228 | sequence_SO=chromosome | SO=protein_coding	1.03	0.962835	0.996417	0.0503741	1	17	17	17	15	11	15	11	15	11	70.2	70.2	70.2	24.659	228	228	7							31		0	107.15	0.81576	1.0343	13.255	27	0	Median	0.7971	1.03	12.782	16	0	Median	0.8822
Tb927.4.2030	Tb927.4.2030	12	4	4	>Tb927.4.2030 | organism=Trypanosoma_brucei_TREU927 | product=ALBA-Domain Protein (ALBA4) | location=Tb927_04_v5.1:509807-511276(-) | length=217 | sequence_SO=chromosome | SO=protein_coding	0.98223	1.01066	0.996446	0.0213244	1	12	4	4	12	11	4	4	4	4	40.6	18	18	22.704	217	217	6.64						11	12	2	0	46.889	0.78629	0.98223	13.094	25	0	Median	0.76045	0.98223	10.283	15	0	Median	0.81427
Tb927.8.810	Tb927.8.810	16	16	16	>Tb927.8.810 | organism=Trypanosoma_brucei_TREU927 | product=radial spoke protein RSP9, putative | location=Tb927_08_v5.1:231165-232166(-) | length=333 | sequence_SO=chromosome | SO=protein_coding	1.0352	0.957763	0.996481	0.058078	1	16	16	16	16	11	16	11	16	11	59.8	59.8	59.8	37.518	333	333	6.51						25	8	6	0	66.952	0.85902	1.0365	18.355	33	0	Median	0.82601	1.0352	18.584	16	0	Median	0.92604
Tb927.10.14740;Tb927.10.14620;Tb11.v5.1063	Tb927.10.14740;Tb927.10.14620;Tb11.v5.1063	15;14;14	15;14;14	15;14;14	>Tb927.10.14740 | organism=Trypanosoma_brucei_TREU927 | product=hypothetical protein, conserved | location=Tb927_10_v5.1:3596415-3597572(-) | length=385 | sequence_SO=chromosome | SO=protein_coding;>Tb927.10.14620 | organism=Trypanosoma_brucei_TREU927 | pr	1.01	0.982994	0.996497	0.0202543	3	15	15	15	15	8	15	8	15	8	46	46	46	44.177	385	385;385;385	5.81					9	21	1	1	0	87.855	0.85662	1.01	20.569	30	0	Median	0.78838	1.01	24.927	16	0	Median	0.87593
Tb927.3.5090	Tb927.3.5090	11	11	11	>Tb927.3.5090 | organism=Trypanosoma_brucei_TREU927 | product=tryparedoxin, putative | location=Tb927_03_v5.1:1429044-1429640(+) | length=198 | sequence_SO=chromosome | SO=protein_coding	1.0459	0.947239	0.996569	0.0739959	1	11	11	11	11	8	11	8	11	8	47	47	47	22.18	198	198	7.11							25	3	0	45.666	0.83049	1.0486	14.899	26	0	Median	0.82386	1.0459	7.4269	15	0	Median	0.93401
Tb927.3.4720	Tb927.3.4720	44	44	8	>Tb927.3.4720 | organism=Trypanosoma_brucei_TREU927 | product=dynamin, putative,vacuolar sortin protein 1, putative | location=Tb927_03_v5.1:1333544-1335526(-) | length=660 | sequence_SO=chromosome | SO=protein_coding	0.98629	1.00695	0.996619	0.0154935	1	44	44	8	39	38	39	38	7	8	78.2	78.2	15.5	73.321	660	660	4.7				98	14	5	15	7	0	231.78	0.80686	0.98858	13.625	131	0	Median	0.77825	0.98629	12.377	64	0	Median	0.84706
Tb927.6.4710	Tb927.6.4710	7	7	7	>Tb927.6.4710 | organism=Trypanosoma_brucei_TREU927 | product=calmodulin, putative | location=Tb927_06_v5.1:1310631-1312652(+) | length=673 | sequence_SO=chromosome | SO=protein_coding	0.99138	1.00192	0.996652	0.00790777	1	7	7	7	7	3	7	3	7	3	14.7	14.7	14.7	74.294	673	673	5.15				8	1	1		3	0	16.953	0.81758	0.99473	23.606	12	0	Median	0.8015	0.99138	25.275	9	0	Median	0.91485
Tb927.9.8880;Tb927.9.8850	Tb927.9.8880;Tb927.9.8850	32;32	32;32	32;32	>Tb927.9.8880 | organism=Trypanosoma_brucei_TREU927 | product=actin A | location=Tb927_09_v5.1:1426858-1428918(-) | length=376 | sequence_SO=chromosome | SO=protein_coding;>Tb927.9.8850 | organism=Trypanosoma_brucei_TREU927 | product=actin A | location=Tb9	0.97961	1.01372	0.996663	0.0255792	2	32	32	32	28	25	28	25	28	25	82.7	82.7	82.7	41.895	376	376;376	6.21					37	56	22	22	0	323.31	0.81455	0.98001	11.709	130	0	Median	0.77125	0.97961	11.988	70	0	Median	0.86768
Tb927.4.660	Tb927.4.660	12	12	12	>Tb927.4.660 | organism=Trypanosoma_brucei_TREU927 | product=hypothetical protein, conserved | location=Tb927_04_v5.1:188026-191291(-) | length=687 | sequence_SO=chromosome | SO=protein_coding	0.98643	1.00698	0.996704	0.0154113	1	12	12	12	6	10	6	10	6	10	29.1	29.1	29.1	78.751	687	687	3.79			4	15					0	51.99	0.82921	0.99307	23.262	15	0	Median	0.79644	0.98643	14.266	6	0	Median	0.87953
Tb927.8.6330	Tb927.8.6330	5	5	5	>Tb927.8.6330 | organism=Trypanosoma_brucei_TREU927 | product=hypothetical protein, conserved | location=Tb927_08_v5.1:1832611-1835271(+) | length=886 | sequence_SO=chromosome | SO=protein_coding	1.0867	0.907029	0.996865	0.134753	1	5	5	5	3	5	3	5	3	5	8.7	8.7	8.7	94.632	886	886	3.38			7			1			0	22.128	0.93502	1.0929	43.518	7	0	Median	0.83779	1.0867	21.065	3	1	Plateau	0.94397
Tb927.8.2030	Tb927.8.2030	22	22	22	>Tb927.8.2030 | organism=Trypanosoma_brucei_TREU927 | product=hypothetical protein, conserved | location=Tb927_08_v5.1:638854-640119(+) | length=421 | sequence_SO=chromosome | SO=protein_coding	0.9747	1.01905	0.996873	0.0332595	1	22	22	22	18	19	18	19	18	19	47.5	47.5	47.5	48.238	421	421	5.02					47	1			0	94.413	0.79099	0.9747	29.063	43	0	Median	0.752	0.9747	15.104	25	0	Median	0.8649
Tb927.11.550	Tb927.11.550	22	22	22	>Tb927.11.550 | organism=Trypanosoma_brucei_TREU927 | product=hypothetical protein SCD6.10 | location=Tb927_11_v5.1:138085-138927(-) | length=280 | sequence_SO=chromosome | SO=protein_coding	1.0001	0.993739	0.99692	0.00477042	1	22	22	22	19	18	19	18	19	18	69.6	69.6	69.6	31.292	280	280	6.82		1	1		1	30	30	25	0	179.81	0.85313	1.0008	12.771	80	0	Median	0.77414	1.0001	11.196	43	0	Median	0.89625
Tb927.5.2410	Tb927.5.2410	57	57	57	>Tb927.5.2410 | organism=Trypanosoma_brucei_TREU927 | product=kinesin, putative | location=Tb927_05_v5.1:825029-829048(+) | length=1339 | sequence_SO=chromosome | SO=protein_coding	1.0079	0.985999	0.996949	0.0164259	1	57	57	57	52	31	52	31	52	31	50.7	50.7	50.7	149.64	1339	1339	2.15		90	14	1					0	193.75	0.82129	1.0121	18.745	93	0	Median	0.79582	1.0079	16.637	60	0	Median	0.8969
Tb927.3.3130	Tb927.3.3130	19	19	19	>Tb927.3.3130 | organism=Trypanosoma_brucei_TREU927 | product=hypothetical protein, conserved | location=Tb927_03_v5.1:802511-807439(-) | length=1642 | sequence_SO=chromosome | SO=protein_coding	0.97737	1.01654	0.996955	0.0293768	1	19	19	19	11	14	11	14	11	14	18.1	18.1	18.1	178.08	1642	1642	2.44	5	22	7	3		1	1		0	120.15	0.8266	0.98373	19.571	32	0	Median	0.76039	0.97737	21.873	16	0	Median	0.85275
Tb927.10.7690	Tb927.10.7690	24	24	24	>Tb927.10.7690 | organism=Trypanosoma_brucei_TREU927 | product=rib72 protein- like protein | location=Tb927_10_v5.1:1934767-1936941(-) | length=724 | sequence_SO=chromosome | SO=protein_coding	0.98638	1.00761	0.996994	0.0159206	1	24	24	24	16	18	16	18	16	18	51	51	51	82.837	724	724	3.63			14	24					0	42.888	0.846	0.98638	16.873	34	0	Median	0.78878	0.98638	20.67	18	0	Median	0.88891
Tb927.8.4870	Tb927.8.4870	28	28	28	>Tb927.8.4870 | organism=Trypanosoma_brucei_TREU927 | product=DIGIT | location=Tb927_08_v5.1:1433298-1436912(-) | length=1204 | sequence_SO=chromosome | SO=protein_coding	1.0515	0.942507	0.997004	0.0817447	1	28	28	28	28	13	28	13	28	13	32.7	32.7	32.7	136.49	1204	1204	2.09		42				1			0	133.74	0.85687	1.0569	11.337	38	0	Median	0.8346	1.0515	10.242	26	0	Median	0.93626
Tb927.7.2390	Tb927.7.2390	26	26	26	>Tb927.7.2390 | organism=Trypanosoma_brucei_TREU927 | product=hypothetical protein, conserved | location=Tb927_07_v5.1:613757-616612(-) | length=951 | sequence_SO=chromosome | SO=protein_coding	0.97526	1.01881	0.997034	0.0326604	1	26	26	26	20	18	20	18	20	18	32.5	32.5	32.5	102.86	951	951	1.12	39	2		1					0	75.474	0.78012	0.97526	20.181	39	0	Median	0.76989	0.97526	19.447	21	0	Median	0.81495
Tb927.7.3550	Tb927.7.3550	70	70	70	>Tb927.7.3550 | organism=Trypanosoma_brucei_TREU927 | product=hypothetical protein, conserved | location=Tb927_07_v5.1:914750-918475(-) | length=1241 | sequence_SO=chromosome | SO=protein_coding	0.98021	1.01392	0.997066	0.0252834	1	70	70	70	64	59	64	59	64	59	55.6	55.6	55.6	138.16	1241	1241	2.76	137	75	66	63	23	26	6	8	0	323.31	0.80254	0.98423	14.821	361	0	Median	0.77501	0.98021	12.773	207	0	Median	0.86211
Tb927.11.10800	Tb927.11.10800	9	9	9	>Tb927.11.10800 | organism=Trypanosoma_brucei_TREU927 | product=hypothetical protein, conserved | location=Tb927_11_v5.1:2888236-2889024(+) | length=262 | sequence_SO=chromosome | SO=protein_coding	1.0306	0.963855	0.997228	0.0500584	1	9	9	9	9	2	9	2	9	2	55.3	55.3	55.3	29.847	262	262	6.85						2	11		0	32.725	0.81805	1.0306	10.775	12	0	Median	0.79881	1.0306	11.426	10	0	Median	0.90504
Tb927.8.4400	Tb927.8.4400	18	18	18	>Tb927.8.4400 | organism=Trypanosoma_brucei_TREU927 | product=hypothetical protein, conserved | location=Tb927_08_v5.1:1309036-1311042(-) | length=668 | sequence_SO=chromosome | SO=protein_coding	1.0368	0.957671	0.997235	0.0593468	1	18	18	18	12	16	12	16	12	16	37	37	37	75.932	668	668	3.81			6	25					0	56.013	0.8968	1.0442	11.762	26	0	Median	0.81201	1.0368	13.311	14	0	Median	0.90876
Tb927.11.9590	Tb927.11.9590	37	37	37	>Tb927.11.9590 | organism=Trypanosoma_brucei_TREU927 | product=S-adenosylhomocysteine hydrolase, putative | location=Tb927_11_v5.1:2610177-2611490(-) | length=437 | sequence_SO=chromosome | SO=protein_coding	1.0214	0.973236	0.997318	0.036123	1	37	37	37	35	31	35	31	35	31	77.6	77.6	77.6	48.447	437	437	5.54	8	1	1	8	100	42	33	17	0	203.51	0.84176	1.0244	13.602	193	0	Median	0.79588	1.0214	13.621	104	0	Median	0.89417
Tb927.9.9230	Tb927.9.9230	5	5	5	>Tb927.9.9230 | organism=Trypanosoma_brucei_TREU927 | product=hypothetical protein, conserved | location=Tb927_09_v5.1:1472128-1472637(-) | length=169 | sequence_SO=chromosome | SO=protein_coding	1.1251	0.869565	0.997333	0.191651	1	5	5	5	4	3	4	3	4	3	46.2	46.2	46.2	19.876	169	169	7							8		0	19.885	0.91889	1.15	9.1989	7	0	Median	0.87943	1.1251	9.1005	4	0	Median	0.95609
Tb927.11.15230	Tb927.11.15230	8	8	8	>Tb927.11.15230 | organism=Trypanosoma_brucei_TREU927 | product=cytosolic coat protein, putative | location=Tb927_11_v5.1:4043487-4044173(-) | length=228 | sequence_SO=chromosome | SO=protein_coding	0.99538	0.9993	0.99734	0.00294037	1	8	8	8	6	4	6	4	6	4	30.3	30.3	30.3	25.564	228	228	7							11		0	46.761	0.80775	0.99806	9.8227	8	0	Median	0.80281	0.99538	11.199	5	0	Median	0.8387
Tb927.11.8160	Tb927.11.8160	85	83	81	>Tb927.11.8160 | organism=Trypanosoma_brucei_TREU927 | product=dynein heavy chain, putative | location=Tb927_11_v5.1:2283465-2295923(+) | length=4152 | sequence_SO=chromosome | SO=protein_coding	1.0346	0.960154	0.997377	0.0558348	1	85	83	81	50	66	49	64	47	62	26.4	26	25.4	473.83	4152	4152	1.54	85	66	2	3			1		0	323.31	0.85701	1.0404	20.617	129	0	Median	0.82512	1.0346	23.235	55	0	Median	0.90812
Tb927.8.3150	Tb927.8.3150	37	37	37	>Tb927.8.3150 | organism=Trypanosoma_brucei_TREU927 | product=T-complex protein 1, gamma subunit, putative (TCP-1-gamma) | location=Tb927_08_v5.1:937585-939276(+) | length=556 | sequence_SO=chromosome | SO=protein_coding	0.9657	1.02911	0.997407	0.0475602	1	37	37	37	35	34	35	34	35	34	83.8	83.8	83.8	60.817	556	556	4.23		1	2	96	16	5	2		0	166.92	0.79278	0.96701	19.506	104	0	Median	0.76378	0.9657	23.461	58	0	Median	0.84243
Tb927.10.13790	Tb927.10.13790	40	40	40	>Tb927.10.13790 | organism=Trypanosoma_brucei_TREU927 | product=hypothetical protein, conserved | location=Tb927_10_v5.1:3366096-3368138(-) | length=680 | sequence_SO=chromosome | SO=protein_coding	1.0307	0.964227	0.997464	0.0498546	1	40	40	40	32	34	32	34	32	34	67.2	67.2	67.2	74.674	680	680	4.18			1	83	2		1	3	0	178.31	0.848	1.0307	15.214	78	0	Median	0.80824	1.0307	17.9	38	0	Median	0.89325
Tb927.10.14240;Tb11.v5.0859	Tb927.10.14240;Tb11.v5.0859	9;7	9;7	9;7	>Tb927.10.14240 | organism=Trypanosoma_brucei_TREU927 | product=N-myristoyltransferase (NMT) | location=Tb927_10_v5.1:3456872-3458212(-) | length=446 | sequence_SO=chromosome | SO=protein_coding;>Tb11.v5.0859 | organism=Trypanosoma_brucei_TREU927 | product	1.0089	0.986582	0.997741	0.0167381	2	9	9	9	8	6	8	6	8	6	30	30	30	50.528	446	446;378	5				1	17	1			0	20.853	0.87255	1.0112	11.933	14	0	Median	0.79836	1.0089	13.082	9	0	Median	0.91926
Tb927.9.6560	Tb927.9.6560	13	13	13	>Tb927.9.6560 | organism=Trypanosoma_brucei_TREU927 | product=protein kinase, putative | location=Tb927_09_v5.1:1077469-1079649(+) | length=726 | sequence_SO=chromosome | SO=protein_coding	1.0554	0.940291	0.997846	0.0863314	1	13	13	13	11	11	11	11	11	11	27.8	27.8	27.8	80.198	726	726	4.79			3	19	19	8	3		0	71.115	0.86274	1.0554	11.788	50	0	Median	0.83429	1.0554	12.005	32	0	Median	0.93948
Tb927.3.3300	Tb927.3.3300	27	27	27	>Tb927.3.3300 | organism=Trypanosoma_brucei_TREU927 | product=hypothetical protein, conserved | location=Tb927_03_v5.1:847432-849876(-) | length=814 | sequence_SO=chromosome | SO=protein_coding	0.9886	1.00712	0.99786	0.0138903	1	27	27	27	20	22	20	22	20	22	40.8	40.8	40.8	89.197	814	814	3.76		14	38	5	1	9	3	5	0	214.47	0.80411	0.9886	30.541	60	0	Median	0.77432	0.9886	38.924	32	0	Median	0.8348
Tb927.11.15140	Tb927.11.15140	21	21	21	>Tb927.11.15140 | organism=Trypanosoma_brucei_TREU927 | product=hypothetical protein, conserved | location=Tb927_11_v5.1:4025337-4027043(-) | length=568 | sequence_SO=chromosome | SO=protein_coding	0.97079	1.02497	0.997879	0.0406337	1	21	21	21	15	14	15	14	15	14	40.1	40.1	40.1	62.089	568	568	4.56		2		24	10	4	2	1	0	52.339	0.80664	0.97079	21.239	36	0	Median	0.75699	0.97079	20.959	20	0	Median	0.83958
Tb927.10.14760	Tb927.10.14760	5	5	5	>Tb927.10.14760 | organism=Trypanosoma_brucei_TREU927 | product=hypothetical protein, conserved | location=Tb927_10_v5.1:3599574-3600143(-) | length=189 | sequence_SO=chromosome | SO=protein_coding	0.97968	1.01613	0.997903	0.0273344	1	5	5	5	5	2	5	2	5	2	25.4	25.4	25.4	20.51	189	189	6.86	1					1	7	5	0	17.643	0.76411	0.97029	14.209	12	0	Median	0.76411	0.97968	13.902	10	0	Median	0.82353
Tb927.11.3730	Tb927.11.3730	59	59	59	>Tb927.11.3730 | organism=Trypanosoma_brucei_TREU927 | product=leucyl-tRNA synthetase, putative (LeuRS) | location=Tb927_11_v5.1:1098860-1102084(+) | length=1074 | sequence_SO=chromosome | SO=protein_coding	0.98859	1.00733	0.997962	0.0140575	1	59	59	59	59	51	59	51	59	51	65.8	65.8	65.8	121.82	1074	1074	2.39		142	37	19	1				0	323.31	0.81795	0.99159	11.669	180	0	Median	0.78057	0.98859	11.652	95	0	Median	0.85312
Tb927.5.520	Tb927.5.520	10	10	10	>Tb927.5.520 | organism=Trypanosoma_brucei_TREU927 | product=stomatin-like protein, putative | location=Tb927_05_v5.1:219996-221591(-) | length=531 | sequence_SO=chromosome | SO=protein_coding	0.89395	1.10223	0.998091	0.156212	1	10	10	10	5	6	5	6	5	6	21.7	21.7	21.7	55.979	531	531	5.33					8	4			0	47.59	0.77918	0.90058	9.8862	10	0	Median	0.69895	0.89395	7.3466	5	0	Median	0.82091
Tb927.10.730;Tb11.v5.0822	Tb927.10.730;Tb11.v5.0822	16;14	16;14	16;14	>Tb927.10.730 | organism=Trypanosoma_brucei_TREU927 | product=ATP synthase, putative | location=Tb927_10_v5.1:187414-188820(+) | length=468 | sequence_SO=chromosome | SO=protein_coding;>Tb11.v5.0822 | organism=Trypanosoma_brucei_TREU927 | product=ATP synth	1.023	0.973236	0.998118	0.037323	2	16	16	16	10	13	10	13	10	13	43.2	43.2	43.2	52.901	468	468;499	5.1					26	3			0	89.108	0.8869	1.0253	16.189	24	0	Median	0.8125	1.023	20.121	13	0	Median	0.93109
Tb927.6.4670	Tb927.6.4670	19	19	19	>Tb927.6.4670 | organism=Trypanosoma_brucei_TREU927 | product=MORN repeat-containing protein (TbMORN1) | location=Tb927_06_v5.1:1303156-1304232(+) | length=358 | sequence_SO=chromosome | SO=protein_coding	1.0084	0.987947	0.998174	0.0153397	1	19	19	19	18	12	18	12	18	12	52.2	52.2	52.2	40.686	358	358	6.08						37	1	1	0	74.511	0.79159	1.0089	17.984	36	0	Median	0.76973	1.0084	12.742	23	0	Median	0.90459
Tb927.11.1020	Tb927.11.1020	12	12	12	>Tb927.11.1020 | organism=Trypanosoma_brucei_TREU927 | product=ribokinase, putative | location=Tb927_11_v5.1:260682-261683(+) | length=333 | sequence_SO=chromosome | SO=protein_coding	1.0296	0.967118	0.998359	0.0468615	1	12	12	12	10	10	10	10	10	10	52	52	52	35.288	333	333	6.67						25	10	10	0	105.57	0.81915	1.03	11.011	40	0	Median	0.80232	1.0296	10.959	27	0	Median	0.87514
Tb927.8.1840	Tb927.8.1840	23	23	23	>Tb927.8.1840 | organism=Trypanosoma_brucei_TREU927 | product=hypothetical protein, conserved | location=Tb927_08_v5.1:596869-603060(-) | length=2063 | sequence_SO=chromosome | SO=protein_coding	0.94717	1.04981	0.998492	0.0769827	1	23	23	23	17	15	17	15	17	15	15.2	15.2	15.2	225.88	2063	2063	1.85	16	26	3					1	0	96.085	0.77976	0.95255	20.964	35	0	Median	0.75552	0.94717	17.092	16	0	Median	0.83886
Tb927.3.1040	Tb927.3.1040	15	15	15	>Tb927.3.1040 | organism=Trypanosoma_brucei_TREU927 | product=hypothetical protein, conserved (pseudogene),hypothetical protein, conserved, interrupted | location=Tb927_03_v5.1:259855-261048(+) | length=398 | sequence_SO=chromosome | SO=protein_coding	0.98363	1.01336	0.998493	0.0222945	1	15	15	15	10	13	10	13	10	13	49.5	49.5	49.5	46.322	398	398	3			26						0	148.38	0.81953	0.98682	13.779	22	0	Median	0.77612	0.98363	9.0971	10	0	Median	0.86818
Tb927.6.2700	Tb927.6.2700	4	4	4	>Tb927.6.2700 | organism=Trypanosoma_brucei_TREU927 | product=small nuclear ribonucleoprotein Sm-E (Sm-E) | location=Tb927_06_v5.1:811050-811333(+) | length=86 | sequence_SO=chromosome | SO=protein_coding	0.90825	1.08884	0.998544	0.135441	1	4	4	4	4	2	4	2	4	2	67.4	67.4	67.4	9.6554	86	86	8								7	0	14.932	0.74541	0.91841	5.2375	6	0	Median	0.7135	0.90825	6.7286	4	0	Median	0.76536
Tb927.9.11100	Tb927.9.11100	11	11	3	>Tb927.9.11100 | organism=Trypanosoma_brucei_TREU927 | product=protein kinase A catalytic subunit isoform 1,protein kinase A catalytic subunit (PKAC1) | location=Tb927_09_v5.1:1749829-1750833(-) | length=334 | sequence_SO=chromosome | SO=protein_coding	1.0613	0.935891	0.998596	0.0940564	1	11	11	3	10	8	10	8	3	3	44.6	44.6	11.7	38.039	334	334	6.08						23		1	0	91.544	0.85935	1.0613	10.256	24	0	Median	0.80894	1.0613	11.168	14	0	Median	0.92705
Tb927.2.5270	Tb927.2.5270	81	79	79	>Tb927.2.5270 | organism=Trypanosoma_brucei_TREU927 | product=dynein heavy chain, putative | location=Tb927_02_v5.1:925431-938171(+) | length=4246 | sequence_SO=chromosome | SO=protein_coding	0.97983	1.0174	0.998614	0.0281756	1	81	79	79	49	72	48	70	48	70	25.8	25.4	25.4	485.74	4246	4246	1.64	83	58	2	2				4	0	323.31	0.81122	0.98175	19.542	116	0	Median	0.7744	0.97983	19.765	49	0	Median	0.83993
Tb927.11.260	Tb927.11.260	65	65	65	>Tb927.11.260 | organism=Trypanosoma_brucei_TREU927 | product=predicted WD40 repeat protein (PIFTF6) | location=Tb927_11_v5.1:57995-62065(-) | length=1356 | sequence_SO=chromosome | SO=protein_coding	1.0174	0.979912	0.998656	0.0281161	1	65	65	65	61	41	61	41	61	41	62.2	62.2	62.2	149.06	1356	1356	2.25		121	12	12					0	323.31	0.82606	1.0174	17.087	131	0	Median	0.80495	1.0174	14.436	82	0	Median	0.85111
Tb927.10.14700	Tb927.10.14700	5	5	5	>Tb927.10.14700 | organism=Trypanosoma_brucei_TREU927 | product=hypothetical protein, conserved | location=Tb927_10_v5.1:3590505-3591533(-) | length=342 | sequence_SO=chromosome | SO=protein_coding	0.8709	1.12644	0.998672	0.191657	1	5	5	5	4	5	4	5	4	5	15.8	15.8	15.8	37.7	342	342	6.67					3	5	1	6	0	7.8683	0.75183	0.88775	10.796	9	0	Median	0.70152	0.8709	11.868	4	0	Median	0.8064
Tb927.8.5140	Tb927.8.5140	11	11	11	>Tb927.8.5140 | organism=Trypanosoma_brucei_TREU927 | product=diacylglycerol kinase, putative | location=Tb927_08_v5.1:1532194-1533921(+) | length=575 | sequence_SO=chromosome | SO=protein_coding	1.0565	0.940999	0.99875	0.0866255	1	11	11	11	6	10	6	10	6	10	38.1	38.1	38.1	62.699	575	575	4				17					0	29.201	0.88124	1.0565	22.675	16	0	Median	0.83801	1.0565	15.393	6	0	Median	0.93182
Tb927.11.720;Tb11.0840	Tb927.11.720;Tb11.0840	9;8	9;8	9;8	>Tb927.11.720 | organism=Trypanosoma_brucei_TREU927 | product=hypothetical protein, conserved | location=Tb927_11_v5.1:172561-173355(-) | length=264 | sequence_SO=chromosome | SO=protein_coding;>Tb11.0840 | organism=Trypanosoma_brucei_TREU927 | product=hyp	0.97298	1.02455	0.998764	0.0386761	2	9	9	9	7	7	7	7	7	7	45.8	45.8	45.8	30.18	264	264;261	6.52						17	6	4	0	35.759	0.77514	0.97298	10.049	26	0	Median	0.76795	0.97298	6.8284	18	0	Median	0.81907
Tb927.5.1680	Tb927.5.1680	15	15	15	>Tb927.5.1680 | organism=Trypanosoma_brucei_TREU927 | product=hypothetical protein, conserved | location=Tb927_05_v5.1:586032-591287(+) | length=1751 | sequence_SO=chromosome | SO=protein_coding	0.98866	1.00897	0.998815	0.0152323	1	15	15	15	9	13	9	13	9	13	10.9	10.9	10.9	194.69	1751	1751	1.96	3	21	2						0	76.489	0.83671	0.99111	12.457	26	0	Median	0.79777	0.98866	14.096	12	0	Median	0.86499
Tb927.8.1860	Tb927.8.1860	7	7	7	>Tb927.8.1860 | organism=Trypanosoma_brucei_TREU927 | product=pitrilysin-like metalloprotease,metallo-peptidase, Clan ME, Family M16C | location=Tb927_08_v5.1:605726-608818(-) | length=1030 | sequence_SO=chromosome | SO=protein_coding	1.0585	0.939144	0.998822	0.0895174	1	7	7	7	5	4	5	4	5	4	11	11	11	114.53	1030	1030	3.5			7	4	1				0	36.155	0.87368	1.0648	19.793	11	0	Median	0.84588	1.0585	23.201	6	0	Median	0.98704
Tb927.6.5030	Tb927.6.5030	9	9	9	>Tb927.6.5030 | organism=Trypanosoma_brucei_TREU927 | product=leucine-rich repeat protein (LRRP), putative | location=Tb927_06_v5.1:1378650-1380308(+) | length=552 | sequence_SO=chromosome | SO=protein_coding	1.0665	0.931272	0.998886	0.101421	1	9	9	9	8	6	8	6	8	6	25	25	25	64.845	552	552	4				14					0	26.154	0.86315	1.0701	19.998	12	0	Median	0.86168	1.0665	18.36	7	0	Median	0.89464
Tb927.4.110	Tb927.4.110	21	3	1	>Tb927.4.110 | organism=Trypanosoma_brucei_TREU927 | product=retrotransposon hot spot protein (RHS, pseudogene), putative,retrotransposon hot spot protein 1 (RHS1), interrupted | location=Tb927_04_v5.1:3639-4715(-) | length=359 | sequence_SO=chromosome | S	1.0268	0.971062	0.998931	0.0418032	1	21	3	1	17	20	2	3	0	1	59.3	8.9	5.3	40.669	359	359	3.46	2	1	6	2			1	1	0	32.082	0.85512	1.0298	10.727	13	0	Median	0.81449	1.0268	10.636	6	0	Median	0.89872
Tb927.7.2500	Tb927.7.2500	13	12	12	>Tb927.7.2500 | organism=Trypanosoma_brucei_TREU927 | product=proteasome regulatory ATPase subunit 1 | location=Tb927_07_v5.1:641555-642868(-) | length=437 | sequence_SO=chromosome | SO=protein_coding	0.98724	1.01071	0.998977	0.0176052	1	13	12	12	9	10	8	9	8	9	35.5	32.7	32.7	48.475	437	437	5.14					19	1	1		0	37.375	0.84995	0.98832	15.189	18	0	Median	0.79484	0.98724	16.887	9	0	Median	0.90287
Tb927.8.2080	Tb927.8.2080	9	9	6	>Tb927.8.2080 | organism=Trypanosoma_brucei_TREU927 | product=hypothetical protein, conserved | location=Tb927_08_v5.1:656024-656584(+) | length=186 | sequence_SO=chromosome | SO=protein_coding	0.97364	1.02439	0.999015	0.0380631	1	9	9	6	7	4	7	4	5	2	50.5	50.5	42.5	20.204	186	186	7.6							8	12	0	38.44	0.77978	0.97364	17.927	20	0	Median	0.77978	0.97364	16.053	16	0	Median	0.80606
Tb927.7.5210	Tb927.7.5210	24	24	24	>Tb927.7.5210 | organism=Trypanosoma_brucei_TREU927 | product=hypothetical protein, conserved | location=Tb927_07_v5.1:1372414-1375115(+) | length=898 | sequence_SO=chromosome | SO=protein_coding	1.0102	0.988045	0.999122	0.0166165	1	24	24	24	18	16	18	16	18	16	35.7	35.7	35.7	100.48	898	898	3.08			37	1	1				0	125.5	0.87635	1.0102	14.882	35	0	Median	0.79912	1.0102	13.78	19	0	Median	0.90243
Tb927.3.3270	Tb927.3.3270	51	51	51	>Tb927.3.3270 | organism=Trypanosoma_brucei_TREU927 | product=ATP-dependent phosphofructokinase (TbPFK) | location=Tb927_03_v5.1:839799-841262(-) | length=487 | sequence_SO=chromosome | SO=protein_coding	1.0204	0.977995	0.999198	0.0318037	1	51	51	51	49	45	49	45	49	45	85.8	85.8	85.8	53.517	487	487	4.86	38	40	59	67	182	82	70	50	0	323.31	0.83643	1.0209	14.043	523	0	Median	0.80602	1.0204	11.096	295	0	Median	0.90198
Tb927.5.1160	Tb927.5.1160	20	20	20	>Tb927.5.1160 | organism=Trypanosoma_brucei_TREU927 | product=hypothetical protein, conserved | location=Tb927_05_v5.1:452897-453583(+) | length=228 | sequence_SO=chromosome | SO=protein_coding	0.97507	1.02335	0.999211	0.0362122	1	20	20	20	20	14	20	14	20	14	64.9	64.9	64.9	25.569	228	228	7.21						1	54	16	0	148.92	0.7873	0.97718	14.029	64	0	Median	0.75507	0.97507	13.833	40	0	Median	0.80526
Tb927.4.2040	Tb927.4.2040	17	17	9	>Tb927.4.2040 | organism=Trypanosoma_brucei_TREU927 | product=ALBA-Domain Protein (ALBA3) | location=Tb927_04_v5.1:512242-512814(-) | length=190 | sequence_SO=chromosome | SO=protein_coding	0.98059	1.01784	0.999216	0.0279396	1	17	17	9	17	14	17	14	9	7	54.7	54.7	28.9	20.808	190	190	6.98						25	47	23	0	100.84	0.80413	0.98247	12.578	86	0	Median	0.75709	0.98059	9.1649	44	0	Median	0.85369
Tb927.7.210	Tb927.7.210	7	7	7	>Tb927.7.210 | organism=Trypanosoma_brucei_TREU927 | product=proline dehydrogenase | location=Tb927_07_v5.1:39714-41384(+) | length=556 | sequence_SO=chromosome | SO=protein_coding	1.1122	0.886289	0.999245	0.169433	1	7	7	7	6	3	6	3	6	3	17.4	17.4	17.4	63.858	556	556	4				10					0	16.101	0.87057	1.1193	14.076	10	0	Median	0.86492	1.1122	16.84	7	0	Median	0.93532
Tb927.2.2160	Tb927.2.2160	15	15	15	>Tb927.2.2160 | organism=Trypanosoma_brucei_TREU927 | product=paraflagellar rod component, putative (PFC11) | location=Tb927_02_v5.1:411120-412109(-) | length=329 | sequence_SO=chromosome | SO=protein_coding	1.0271	0.97144	0.99927	0.0417452	1	15	15	15	14	13	14	13	14	13	52.9	52.9	52.9	37.731	329	329	6						34			0	76.104	0.87509	1.0283	7.4455	28	0	Median	0.81542	1.0271	7.5978	15	0	Median	0.93139
Tb927.10.3520	Tb927.10.3520	13	12	12	>Tb927.10.3520 | organism=Trypanosoma_brucei_TREU927 | product=protease regulatory ATPase subunit 4 (RPT4) | location=Tb927_10_v5.1:909983-911182(+) | length=399 | sequence_SO=chromosome | SO=protein_coding	0.97358	1.02509	0.999337	0.0386357	1	13	12	12	11	7	10	6	10	6	41.6	38.6	38.6	44.855	399	399	5.71					6	10	1		0	52.663	0.77561	0.97455	14.123	16	0	Median	0.77357	0.97358	8.6899	11	0	Median	0.89048
Tb927.9.9940	Tb927.9.9940	11	11	11	>Tb927.9.9940 | organism=Trypanosoma_brucei_TREU927 | product=PACRGB | location=Tb927_09_v5.1:1572161-1573099(-) | length=312 | sequence_SO=chromosome | SO=protein_coding	1.0339	0.964785	0.999343	0.051836	1	11	11	11	9	9	9	9	9	9	45.8	45.8	45.8	35.353	312	312	6.17						19	4		0	45.889	0.84384	1.0352	11.935	18	0	Median	0.8166	1.0339	10.274	9	0	Median	0.9221
Tb927.3.3450	Tb927.3.3450	17	17	17	>Tb927.3.3450 | organism=Trypanosoma_brucei_TREU927 | product=ADP-ribosylation factor-like protein 3A, putative | location=Tb927_03_v5.1:979573-980109(+) | length=178 | sequence_SO=chromosome | SO=protein_coding	0.9988	0.9999	0.99935	0.000825007	1	17	17	17	17	14	17	14	17	14	87.6	87.6	87.6	19.881	178	178	7.17	1					1	43	18	0	299.75	0.79704	0.99944	12.685	56	0	Median	0.78025	0.9988	7.6758	27	0	Median	0.82906
Tb927.5.2570	Tb927.5.2570	39	39	39	>Tb927.5.2570 | organism=Trypanosoma_brucei_TREU927 | product=translation initiation factor, putative (EIF3B) | location=Tb927_05_v5.1:882648-884738(+) | length=696 | sequence_SO=chromosome | SO=protein_coding	0.97063	1.02831	0.99947	0.0432595	1	39	39	39	31	38	31	38	31	38	70.8	70.8	70.8	79.81	696	696	3.76		4	17	82					0	83.506	0.78194	0.97247	16.146	94	0	Median	0.75921	0.97063	15.14	50	0	Median	0.8312
Tb927.9.4210;Tb11.v5.0561	Tb927.9.4210;Tb11.v5.0561	37;20	37;20	6;2	>Tb927.9.4210 | organism=Trypanosoma_brucei_TREU927 | product=fatty acyl CoA synthetase 3 (ACS3) | location=Tb927_09_v5.1:797487-800028(+) | length=702 | sequence_SO=chromosome | SO=protein_coding;>Tb11.v5.0561 | organism=Trypanosoma_brucei_TREU927 | produ	0.97447	1.02461	0.999541	0.0376059	2	37	37	6	34	35	34	35	5	6	49.4	49.4	12.5	77.853	702	702;403	4.43	7	5	7	99	22	7	21	3	0	189.06	0.79874	0.97582	15.766	150	0	Median	0.75515	0.97447	15.643	85	0	Median	0.83624
Tb927.3.1670	Tb927.3.1670	33	33	33	>Tb927.3.1670 | organism=Trypanosoma_brucei_TREU927 | product=hypothetical protein, conserved | location=Tb927_03_v5.1:438858-441941(-) | length=1027 | sequence_SO=chromosome | SO=protein_coding	1.0518	0.947508	0.999654	0.078219	1	33	33	33	32	15	32	15	32	15	52.8	52.8	52.8	112.56	1027	1027	2.39		43	28						0	112.9	0.86009	1.0518	15.36	60	0	Median	0.84251	1.0518	16.046	38	0	Median	0.88924
Tb927.11.4530	Tb927.11.4530	6	6	6	>Tb927.11.4530 | organism=Trypanosoma_brucei_TREU927 | product=N-acetyltransferase subunit ARD1 (ARD1) | location=Tb927_11_v5.1:1315704-1316432(+) | length=239 | sequence_SO=chromosome | SO=protein_coding	0.94832	1.05103	0.999674	0.0770305	1	6	6	6	4	2	4	2	4	2	31.8	31.8	31.8	27.484	239	239	6.67						2	4		0	8.9062	0.73798	0.94832	20.092	5	0	Median	0.73798	0.94832	20.998	3	0	Median	0.7987
Tb927.6.3650	Tb927.6.3650	12	12	12	>Tb927.6.3650 | organism=Trypanosoma_brucei_TREU927 | product=ADP-ribosylation factor, putative | location=Tb927_06_v5.1:1086752-1087303(-) | length=183 | sequence_SO=chromosome | SO=protein_coding	0.96211	1.03751	0.999808	0.0565469	1	12	12	12	12	10	12	10	12	10	73.2	73.2	73.2	20.072	183	183	7.28							29	11	0	78.869	0.79042	0.96385	14.02	35	0	Median	0.76017	0.96211	11.826	22	0	Median	0.82742
Tb927.9.9630	Tb927.9.9630	9	9	9	>Tb927.9.9630 | organism=Trypanosoma_brucei_TREU927 | product=hypothetical protein, conserved | location=Tb927_09_v5.1:1532826-1533893(-) | length=355 | sequence_SO=chromosome | SO=protein_coding	0.98533	1.01436	0.999847	0.021775	1	9	9	9	8	5	8	5	8	5	30.1	30.1	30.1	38.92	355	355	6.38						12	2	2	0	22.792	0.82724	0.98558	18.162	12	0	Median	0.78146	0.98533	22.788	7	0	Median	0.89541
Tb11.v5.0996;Tb11.1220;Tb927.10.15250	Tb11.v5.0996;Tb11.1220;Tb927.10.15250	22;22;21	22;22;21	22;22;21	>Tb11.v5.0996 | organism=Trypanosoma_brucei_TREU927 | product=hypothetical protein, conserved | location=Tb927_11_bin_v5.1:5170885-5172342(+) | length=485 | sequence_SO=random_sequence | SO=protein_coding;>Tb11.1220 | organism=Trypanosoma_brucei_TREU927 |	1.0113	0.988728	1.00001	0.0169286	3	22	22	22	19	15	19	15	19	15	48.7	48.7	48.7	57.799	485	485;485;485	4.66	1	1		16	39	1	1		0	69.126	0.81387	1.0113	29.335	57	0	Median	0.79501	1.0113	33.464	35	0	Median	0.88299
Tb927.5.1300	Tb927.5.1300	26	26	26	>Tb927.5.1300 | organism=Trypanosoma_brucei_TREU927 | product=vacuolar proton translocating ATPase subunit A, putative | location=Tb927_05_v5.1:481692-484043(+) | length=783 | sequence_SO=chromosome | SO=protein_coding	1.0125	0.987557	1.00003	0.0187074	1	26	26	26	26	23	26	23	26	23	40.2	40.2	40.2	89.63	783	783	4				59					0	103.72	0.83442	1.0125	9.5192	56	0	Median	0.79047	1.0125	9.7845	29	0	Median	0.88618
Tb927.7.2330	Tb927.7.2330	2	2	2	>Tb927.7.2330 | organism=Trypanosoma_brucei_TREU927 | product=hypothetical protein, conserved | location=Tb927_07_v5.1:599448-602747(-) | length=1099 | sequence_SO=chromosome | SO=protein_coding	0.88487	1.11524	1.00005	0.172776	1	2	2	2	1	2	1	2	1	2	5.4	5.4	5.4	123.84	1099	1099	3.4	1	1	4	2	1	1			0.0019216	1.7886	0.81103	0.89667	24.693	8	0	Median	0.7154	0.88487	18.329	2	0	Median	0.81417
Tb927.11.2420	Tb927.11.2420	4	4	4	>Tb927.11.2420 | organism=Trypanosoma_brucei_TREU927 | product=hypothetical protein, conserved | location=Tb927_11_v5.1:702137-704077(-) | length=646 | sequence_SO=chromosome | SO=protein_coding	1.1012	0.898957	1.00008	0.151682	1	4	4	4	3	2	3	2	3	2	13.8	13.8	13.8	73.98	646	646	4				5					0	2.4201	0.88505	1.0914	6.2361	4	0	Median	0.8744	1.1012	7.5233	3	0	Median	0.93845
Tb927.3.5020	Tb927.3.5020	41	41	41	>Tb927.3.5020 | organism=Trypanosoma_brucei_TREU927 | product=hypothetical protein, conserved | location=Tb927_03_v5.1:1408124-1412365(+) | length=1413 | sequence_SO=chromosome | SO=protein_coding	1.0352	0.965065	1.00013	0.0526015	1	41	41	41	34	32	34	32	34	32	40.9	40.9	40.9	155.86	1413	1413	2.03	18	66	15	3					0	260.73	0.86428	1.0352	18.466	90	0	Median	0.83064	1.0352	20.194	54	0	Median	0.91296
Tb927.5.3220	Tb927.5.3220	10	10	10	>Tb927.5.3220 | organism=Trypanosoma_brucei_TREU927 | product=signal peptidase type I, putative | location=Tb927_05_v5.1:1056244-1056870(-) | length=208 | sequence_SO=chromosome | SO=protein_coding	0.92174	1.07856	1.00015	0.117617	1	10	10	10	10	6	10	6	10	6	43.3	43.3	43.3	23.706	208	208	7							17		0	15.078	0.79403	0.92448	11.823	13	0	Median	0.74549	0.92174	8.4158	7	0	Median	0.82215
Tb927.11.2430	Tb927.11.2430	174	174	172	>Tb927.11.2430 | organism=Trypanosoma_brucei_TREU927 | product=Cytoplasmic dynein 2 heavy chain (DYNC2H1), putative,Cytoplasmic dynein 2 heavy chain (DYNC2H2), putative (DHC1b) | location=Tb927_11_v5.1:705448-718371(-) | length=4307 | sequence_SO=chromosom	1.0352	0.965344	1.00027	0.0523919	1	174	174	172	144	149	144	149	142	147	50.8	50.8	50.2	484.96	4307	4307	1.68	244	241	50	8				1	0	323.31	0.84696	1.0352	17.725	461	0	Median	0.81884	1.0352	20.588	221	0	Median	0.88272
Tb927.11.11690	Tb927.11.11690	31	31	31	>Tb927.11.11690 | organism=Trypanosoma_brucei_TREU927 | product=vacuolar ATP synthase subunit b, putative,v- ATPase B subunit,vacuolar proton pump B subunit | location=Tb927_11_v5.1:3135820-3137307(+) | length=495 | sequence_SO=chromosome | SO=protein_codi	1.0162	0.984349	1.00027	0.0238884	1	31	31	31	29	22	29	22	29	22	78.4	78.4	78.4	55.619	495	495	5.52					63	6	12	5	0	262.74	0.85076	1.0161	16.387	76	0	Median	0.80778	1.0162	17.451	45	0	Median	0.92035
Tb927.11.12210	Tb927.11.12210	12	12	12	>Tb927.11.12210 | organism=Trypanosoma_brucei_TREU927 | product=hypothetical protein, conserved | location=Tb927_11_v5.1:3264668-3265543(+) | length=291 | sequence_SO=chromosome | SO=protein_coding	0.96805	1.03258	1.00031	0.0483959	1	12	12	12	12	5	12	5	12	5	45	45	45	32.43	291	291	6.52						17	6	4	0	55.514	0.76827	0.96805	14.001	23	0	Median	0.75766	0.96805	15.422	17	0	Median	0.86575
Tb927.9.13520	Tb927.9.13520	10	10	10	>Tb927.9.13520 | organism=Trypanosoma_brucei_TREU927 | product=hypothetical protein, conserved | location=Tb927_09_v5.1:2144251-2146977(-) | length=908 | sequence_SO=chromosome | SO=protein_coding	0.93105	1.06986	1.00046	0.104109	1	10	10	10	8	8	8	8	8	8	14.3	14.3	14.3	99.86	908	908	3			18						0	61.871	0.77807	0.93356	8.5185	14	0	Median	0.73514	0.93105	7.9176	6	0	Median	0.82964
Tb927.3.2440	Tb927.3.2440	4	4	4	>Tb927.3.2440 | organism=Trypanosoma_brucei_TREU927 | product=serine/threonine-protein kinase, putative,protein kinase, putative | location=Tb927_03_v5.1:614482-615702(+) | length=406 | sequence_SO=chromosome | SO=protein_coding	1.0844	0.91659	1.0005	0.125857	1	4	4	4	4	3	4	3	4	3	12.6	12.6	12.6	45.811	406	406	1.88	4	3			1				0	20.273	0.90773	1.0844	20.597	7	0	Median	0.88111	1.0844	32.157	3	0	Median	0.93473
Tb927.3.4040	Tb927.3.4040	13	13	13	>Tb927.3.4040 | organism=Trypanosoma_brucei_TREU927 | product=hypothetical protein, conserved | location=Tb927_03_v5.1:1140493-1142352(-) | length=619 | sequence_SO=chromosome | SO=protein_coding	1.0222	0.979048	1.00062	0.0323637	1	13	13	13	12	11	12	11	12	11	28.3	28.3	28.3	67.631	619	619	4.21				24	2	2			0	52.645	0.86101	1.0214	12.04	25	0	Median	0.81034	1.0222	14.022	14	0	Median	0.90012
Tb927.10.11300	Tb927.10.11300	20	20	20	>Tb927.10.11300 | organism=Trypanosoma_brucei_TREU927 | product=paraflagellar rod component, putative (PFC16) | location=Tb927_10_v5.1:2760514-2760894(+) | length=126 | sequence_SO=chromosome | SO=protein_coding	1.0025	0.999001	1.00075	0.00262425	1	20	20	20	20	13	20	13	20	13	96.8	96.8	96.8	14.328	126	126	7.92							5	56	0	140.44	0.81779	1.0022	9.7468	54	0	Median	0.78955	1.0025	9.5317	34	0	Median	0.88351
Tb927.11.8380	Tb927.11.8380	26	26	11	>Tb927.11.8380 | organism=Trypanosoma_brucei_TREU927 | product=NADPH--cytochrome p450 reductase, putative (CPR) | location=Tb927_11_v5.1:2348833-2350740(+) | length=635 | sequence_SO=chromosome | SO=protein_coding	0.99788	1.00368	1.00078	0.00435264	1	26	26	11	20	21	20	21	10	9	51.7	51.7	23.9	70.946	635	635	4				47					0	114.67	0.82465	0.99788	10.82	44	0	Median	0.78584	0.99788	9.6323	22	0	Median	0.86607
Tb927.8.5330	Tb927.8.5330	15	15	15	>Tb927.8.5330 | organism=Trypanosoma_brucei_TREU927 | product=tyrosyl/methionyl-tRNA synthetase, putative | location=Tb927_08_v5.1:1584470-1585141(+) | length=223 | sequence_SO=chromosome | SO=protein_coding	1.0217	0.979912	1.00081	0.0313411	1	15	15	15	15	7	15	7	15	7	75.8	75.8	75.8	24.204	223	223	7.44						2	14	16	0	95.258	0.81694	1.0217	17.046	29	0	Median	0.80786	1.0217	14.588	22	0	Median	0.89484
Tb927.10.13320	Tb927.10.13320	4	4	4	>Tb927.10.13320 | organism=Trypanosoma_brucei_TREU927 | product=DNA-directed RNA polymerase II/III subunit, putative (RPB5) | location=Tb927_10_v5.1:3251030-3251689(-) | length=219 | sequence_SO=chromosome | SO=protein_coding	0.97502	1.02668	1.00085	0.0387476	1	4	4	4	4	2	4	2	4	2	31.5	31.5	31.5	25.21	219	219	6.88						1	7		0	18.406	0.78862	0.97451	15.467	8	0	Median	0.75842	0.97502	11.116	5	0	Median	0.80979
Tb927.4.3890	Tb927.4.3890	31	31	31	>Tb927.4.3890 | organism=Trypanosoma_brucei_TREU927 | product=ATP-dependent RNA helicase, putative | location=Tb927_04_v5.1:1021651-1024932(-) | length=1093 | sequence_SO=chromosome | SO=protein_coding	0.98805	1.01366	1.00086	0.0192106	1	31	31	31	28	23	28	23	28	23	39.7	39.7	39.7	122.8	1093	1093	2.44		44	34						0	214.3	0.79456	0.98805	15.152	69	0	Median	0.78052	0.98805	13.53	37	0	Median	0.88786
Tb927.9.11140	Tb927.9.11140	5	5	5	>Tb927.9.11140 | organism=Trypanosoma_brucei_TREU927 | product=hypothetical protein, conserved | location=Tb927_09_v5.1:1764248-1765678(-) | length=476 | sequence_SO=chromosome | SO=protein_coding	1.0101	0.991768	1.00093	0.0137488	1	5	5	5	4	2	4	2	4	2	12.8	12.8	12.8	51.895	476	476	5					7				0	7.6358	0.84741	1.0083	6.2606	4	0	Median	0.78253	1.0101	28.035	4	2	Median	0.89272
Tb927.9.12110	Tb927.9.12110	25	25	25	>Tb927.9.12110 | organism=Trypanosoma_brucei_TREU927 | product=6-phosphogluconate dehydrogenase, decarboxylating (gnD) | location=Tb927_09_v5.1:1894375-1895814(+) | length=479 | sequence_SO=chromosome | SO=protein_coding	0.97317	1.02883	1.001	0.0417433	1	25	25	25	23	21	23	21	23	21	72	72	72	52.165	479	479	5.31			1	1	55	5	7	2	0	177.27	0.81072	0.9722	14.309	55	0	Median	0.76852	0.97317	14.432	31	0	Median	0.8374
Tb927.11.2610	Tb927.11.2610	37	37	37	>Tb927.11.2610 | organism=Trypanosoma_brucei_TREU927 | product=hypothetical protein, conserved | location=Tb927_11_v5.1:766107-767492(-) | length=461 | sequence_SO=chromosome | SO=protein_coding	1.0257	0.976467	1.00108	0.0369246	1	37	37	37	33	37	33	37	33	37	69.2	69.2	69.2	50.887	461	461	5.04	3	11	8	92	8	34	31	22	0	271.51	0.82883	1.0241	15.192	189	0	Median	0.80966	1.0257	12.325	106	0	Median	0.88061
Tb927.1.120	Tb927.1.120	61	61	15	>Tb927.1.120 | organism=Trypanosoma_brucei_TREU927 | product=retrotransposon hot spot protein 4 (RHS4), putative | location=Tb927_01_v5.1:60266-62836(-) | length=856 | sequence_SO=chromosome | SO=protein_coding	0.97587	1.02633	1.0011	0.0378414	1	61	61	15	55	51	55	51	12	13	64.8	64.8	21.3	98.024	856	856	3.15	25	44	150	44	9	7	6	6	0	323.31	0.79764	0.97499	19.172	255	0	Median	0.77557	0.97587	14.042	141	0	Median	0.84029
Tb927.11.9470	Tb927.11.9470	6	6	6	>Tb927.11.9470 | organism=Trypanosoma_brucei_TREU927 | product=ADP-ribosylation factor GTPase activating protein, putative | location=Tb927_11_v5.1:2589022-2590083(-) | length=353 | sequence_SO=chromosome | SO=protein_coding	0.99399	1.00842	1.00121	0.0108227	1	6	6	6	6	4	6	4	6	4	28.9	28.9	28.9	37.113	353	353	7.57							6	8	0	73.815	0.82921	0.99399	4.3946	9	0	Median	0.78733	0.99399	4.7683	5	0	Median	0.87238
Tb927.10.13720	Tb927.10.13720	11	11	11	>Tb927.10.13720 | organism=Trypanosoma_brucei_TREU927 | product=RNA-binding protein, putative (RBP29) | location=Tb927_10_v5.1:3351198-3352331(-) | length=377 | sequence_SO=chromosome | SO=protein_coding	0.91508	1.08737	1.00123	0.129218	1	11	11	11	10	8	10	8	10	8	30	30	30	40.678	377	377	6.5					13		6	11	0	30.575	0.77786	0.91736	13.99	26	0	Median	0.71952	0.91508	16.679	15	0	Median	0.79348
[truncated: 1,815 more rows]
[truncated: 16 more columns]

## Sheet: Usp7_48h
Protein IDs	Majority protein IDs	Peptide counts (all)	Peptide counts (razor+unique)	Peptide counts (unique)	Fasta headers	experiment1 ratio L/H normalized	experiment2 ratio H/L normalized	average	SD	Number of proteins	Peptides	Razor + unique peptides	Unique peptides	Peptides 1	Peptides 2	Razor + unique peptides 1	Razor + unique peptides 2	Unique peptides 1	Unique peptides 2	Sequence coverage [%]	Unique + razor sequence coverage [%]	Unique sequence coverage [%]	Mol. weight [kDa]	Sequence length	Sequence lengths	Fraction average	Fraction 1	Fraction 2	Fraction 3	Fraction 4	Fraction 5	Fraction 6	Fraction 7	Fraction 8	Q-value	Score	Ratio H/L	Ratio H/L normalized	Ratio H/L variability [%]	Ratio H/L count	Ratio H/L iso-count	Ratio H/L type	Ratio H/L 1	Ratio H/L normalized 1	Ratio H/L variability [%] 1	Ratio H/L count 1	Ratio H/L iso-count 1	Ratio H/L type 1	Ratio H/L 2
[truncated: 3,151 more rows]
[truncated: 16 more columns]

[truncated: 1 more sheets: Vdu1_48h]
